# Supplementary material for: “Candidatus Galacturonibacter soehngenii” Shows Acetogenic Catabolism of Galacturonic Acid but Lacks a Canonical Carbon Monoxide Dehydrogenase/Acetyl-CoA Synthase Complex
Source: Front Microbiol. 2020 Jan 29;11:63. doi: 10.3389/fmicb.2020.00063 (PMC7000372; doi:10.3389/fmicb.2020.00063)
Supplement: Supplementary file 1 [file Data_Sheet_1.xlsx]

## Sheet: RPKM
	Supplementary Data Sheet S1: Transcriptome analysis in RPKM of "Candidatus Galacturonibacter soehngenii" as described in the manuscript (DOI: 10.3389/fmicb.2020.00063). Sample 1A-C are technical triplicates of one enrichment culture, samples 3A-C are technical triplicate samples of the duplicate enrichment culture.
NCBI locus tag	RAST locus tag	Size	average (RPKM)	average deviation (RPKM)	1A	1B	1C	3A	3B	3C
locus_tag=F7O84_RS12565]	6666666.269962.peg.1	252	5.15982	2.86018	2.71742	2.35825	3.72222	11.2102	3.26087	7.69003
locus_tag=F7O84_RS12615]	6666666.269962.peg.10	1014	321.958	82.6575	428.838	399.263	385.745	213.404	267.835	236.662
locus_tag=F7O84_RS07955]	6666666.269962.peg.100	639	156.84	4.24947	164.392	145.315	158.829	155.616	158.175	158.711
locus_tag=F7O84_RS16570]	6666666.269962.peg.1000	1476	137.116	34.4511	107.451	94.4164	106.129	180.292	185.392	149.018
locus_tag=F7O84_RS16565]	6666666.269962.peg.1001	837	116.624	6.53782	119.94	120.702	102.205	118.129	111.431	127.34
locus_tag=F7O84_RS16560]	6666666.269962.peg.1002	906	19.4478	2.97517	16.4773	21.6459	18.4287	19.9556	14.5119	25.6674
locus_tag=F7O84_RS16555]	6666666.269962.peg.1003	1320	40.0821	11.4021	28.7404	29.1512	28.4242	39.8062	62.2529	52.1174
locus_tag=F7O84_RS16550]	6666666.269962.peg.1004	759	23.3364	1.64372	24.1797	25.0553	25.7054	20.0985	23.2772	21.7023
locus_tag=F7O84_RS16545]	6666666.269962.peg.1005	2322	9.06755	0.678522	9.2013	9.02169	10.2606	9.24621	7.07785	9.59764
locus_tag=F7O84_RS16540]	6666666.269962.peg.1006	1314	15.7131	1.75121	17.4064	16.6208	18.1318	12.8994	15.947	13.2732
locus_tag=F7O84_RS16535]	6666666.269962.peg.1007	636	8.46256	4.03348	4.95288	4.20481	4.12956	15.102	9.69031	12.6958
locus_tag=F7O84_RS16530]	6666666.269962.peg.1008	837	148.006	51.5535	193.737	200.756	204.186	105.303	93.7587	90.2959
locus_tag=F7O84_RS16525]	6666666.269962.peg.1009	921	186.003	60.8625	240.16	235.841	264.595	121.464	139.633	114.323
locus_tag=F7O84_RS07950]	6666666.269962.peg.101	804	68.6974	21.5541	42.9271	46.9363	51.5666	78.7053	94.0298	98.0192
locus_tag=F7O84_RS16520]	6666666.269962.peg.1010	603	32.3502	10.589	16.5803	32.5228	34.5333	60.9029	16.353	33.2087
locus_tag=F7O84_RS16515]	6666666.269962.peg.1011	873	63.1535	9.76784	73.7345	67.5627	72.848	51.1276	67.7723	45.8759
locus_tag=F7O84_RS16510]	6666666.269962.peg.1012	1029	24.3524	3.15406	30.8787	20.6467	18.5959	26.3553	25.1553	24.4826
locus_tag=F7O84_RS16505]	6666666.269962.peg.1013	225	44.5438	11.8148	57.8267	56.1264	50.8604	22.5997	31.0435	48.8061
locus_tag=F7O84_RS16500]	6666666.269962.peg.1014	165	3.70983	1.28785	3.32019	6.30297	2.27394	3.42419	4.98023	1.95746
locus_tag=F7O84_RS16495]	6666666.269962.peg.1015	615	5.55147	1.22344	7.34896	6.03943	6.71089	2.75606	4.67656	5.7769
locus_tag=F7O84_RS16490]	6666666.269962.peg.1016	741	13.6362	2.66614	12.0138	17.0424	18.2283	11.4371	12.1985	10.8968
locus_tag=F7O84_RS16485]	6666666.269962.peg.1017	855	4.76714	1.16375	5.60646	4.86545	6.80187	2.64324	5.28604	3.3998
locus_tag=F7O84_RS16480]	6666666.269962.peg.1018	1215	6.31009	0.926538	8.11602	5.62487	6.94814	5.11515	5.41062	6.64571
locus_tag=F7O84_RS16475]	6666666.269962.peg.1019	1062	67.8587	4.93537	77.1194	73.1658	67.4794	68.0969	58.0324	63.2581
locus_tag=F7O84_RS07945]	6666666.269962.peg.102	1425	72.7051	15.9966	49.5932	52.3383	68.1942	85.2444	103.799	77.0622
locus_tag=F7O84_RS16470]	6666666.269962.peg.1020	429	30.0217	5.44768	30.3287	33.939	26.675	18.438	42.1404	28.6091
locus_tag=F7O84_RS11400]	6666666.269962.peg.1021	129	272.922	28.7401	264.361	268.347	241.408	359.142	238.878	265.396
locus_tag=F7O84_RS16465]	6666666.269962.peg.1022	495	56.1085	8.61837	55.8899	70.233	67.8391	51.3629	45.6521	45.6741
locus_tag=F7O84_RS16455]	6666666.269962.peg.1023	495	40.2872	6.61849	36.2454	45.0212	46.6157	49.0801	28.2213	36.5393
locus_tag=F7O84_RS16490]	6666666.269962.peg.1024	144	38.0367	5.62593	47.5548	45.3964	37.7805	35.312	28.5326	33.6439
locus_tag=F7O84_RS16450]	6666666.269962.peg.1025	1041	68.2002	13.146	78.412	76.7825	88.8441	63.5005	38.6793	62.9829
locus_tag=F7O84_RS16445]	6666666.269962.peg.1026	549	8.05175	2.29234	11.4755	5.95362	6.83424	11.3204	4.49037	8.23632
locus_tag=F7O84_RS16440]	6666666.269962.peg.1027	618	23.26	9.90514	29.4748	33.897	36.1236	12.7992	12.6319	14.6335
locus_tag=F7O84_RS16435]	6666666.269962.peg.1028	1578	0.424445	0.146345	0.347168	0.282452	0.475538	0.716086	0.520747	0.204678
locus_tag=F7O84_RS16430]	6666666.269962.peg.1029	414	0.0598108	0.0996846	0	0.358865	0	0	0	0
locus_tag=F7O84_RS07940]	6666666.269962.peg.103	1197	49.4739	22.6115	31.4648	24.2031	24.9193	71.273	74.8283	70.1547
locus_tag=F7O84_RS17130]	6666666.269962.peg.1030	294	126.11	28.8871	151.865	168.278	144.847	63.4175	111.801	116.449
locus_tag=F7O84_RS10620]	6666666.269962.peg.1031	663	44.0872	6.59856	40.0752	46.6102	37.0672	52.8348	35.3236	52.6123
locus_tag=F7O84_RS16420]	6666666.269962.peg.1032	228	6.46542	1.74758	6.00692	9.12271	9.05087	4.95607	5.40618	4.24975
locus_tag=F7O84_RS16415]	6666666.269962.peg.1033	1038	0.512167	0.0775581	0.395832	0.572524	0.542196	0.544308	0.395828	0.622315
locus_tag=F7O84_RS16410]	6666666.269962.peg.1034	381	0.439698	0.586264	0	1.55979	0	0	1.0784	0
locus_tag=F7O84_RS16405]	6666666.269962.peg.1035	1017	0.0531887	0.0709183	0.134669	0	0.184464	0	0	0
locus_tag=F7O84_RS02590]	6666666.269962.peg.1036	132	0	0	0	0	0	0	0	0
locus_tag=F7O84_RS16400]	6666666.269962.peg.1037	177	27.6611	11.5406	26.3083	41.1295	38.1559	12.7682	9.28518	38.3198
locus_tag=F7O84_RS16395]	6666666.269962.peg.1038	474	28.3815	8.6622	42.1853	38.8664	30.0793	10.7277	22.5371	25.893
locus_tag=F7O84_RS16390]	6666666.269962.peg.1039	765	12.1349	4.43186	14.6805	17.673	15.4494	14.0325	5.90792	5.06637
locus_tag=F7O84_RS07935]	6666666.269962.peg.104	306	69.9333	25.8378	42.9672	42.726	46.5934	105.244	106.074	75.9956
locus_tag=F7O84_RS16385]	6666666.269962.peg.1040	864	64.155	8.01885	78.1484	70.8458	67.5273	49.6984	60.394	58.3161
locus_tag=F7O84_RS16380]	6666666.269962.peg.1041	2247	0.979738	0.326568	1.09713	1.12403	1.16885	1.50866	0.548557	0.431217
locus_tag=F7O84_RS16375]	6666666.269962.peg.1042	945	2.69785	0.908076	2.89858	3.45877	4.16889	2.98937	1.30435	1.36712
locus_tag=F7O84_RS16365]	6666666.269962.peg.1043	798	7.55414	1.08782	8.75295	8.00565	8.93333	7.78811	6.17849	5.66634
locus_tag=F7O84_RS16360]	6666666.269962.peg.1044	903	9.53853	1.92564	8.64518	7.56835	7.06356	11.2623	9.1001	13.5917
locus_tag=F7O84_RS16355]	6666666.269962.peg.1045	780	2.89951	0.782697	3.33615	2.28569	4.08871	3.62174	1.58027	2.48447
locus_tag=F7O84_RS16350]	6666666.269962.peg.1046	5793	69.6213	6.70491	67.8288	71.6049	64.6058	82.608	56.3146	74.7658
locus_tag=F7O84_RS16345]	6666666.269962.peg.1047	1356	197.526	69.6153	254.927	272.707	273.791	119.998	140.592	123.143
locus_tag=F7O84_RS16340]	6666666.269962.peg.1048	516	74.9947	23.2615	101.922	99.0466	93.7999	40.513	62.1082	52.5784
locus_tag=F7O84_RS16335]	6666666.269962.peg.1049	1191	79.8226	11.7056	64.6266	67.9854	92.3035	77.799	102.459	73.7623
locus_tag=F7O84_RS07930]	6666666.269962.peg.105	279	452.185	61.7619	415.783	482.985	541.955	407.037	516.9	348.449
locus_tag=F7O84_RS16330]	6666666.269962.peg.1050	402	1.50065	1.28781	0	0.739154	1.4	0	2.04413	4.82062
locus_tag=F7O84_RS16675]	6666666.269962.peg.1051	135	0.398742	0.664571	0	0	0	0	0	2.39245
locus_tag=F7O84_RS16325]	6666666.269962.peg.1052	1065	8.9609	1.51921	9.64492	11.5787	10.2167	8.48814	6.55848	7.27845
locus_tag=F7O84_RS16320]	6666666.269962.peg.1053	903	97.0407	35.2168	104.652	127.346	142.31	119.505	25.4803	62.951
locus_tag=F7O84_RS16310]	6666666.269962.peg.1054	954	76.2133	6.25712	72.068	78.957	76.6918	79.9517	61.5873	88.0243
locus_tag=F7O84_RS16305]	6666666.269962.peg.1055	942	359.5	57.1682	322.912	300.294	283.79	393.455	378.593	477.958
locus_tag=F7O84_RS16300]	6666666.269962.peg.1056	1311	245.269	33.8156	252.082	285.241	299.931	184.883	233.171	216.306
locus_tag=F7O84_RS16295]	6666666.269962.peg.1057	2373	152.042	7.15321	153.003	154.392	140.008	142.617	164.486	157.748
locus_tag=F7O84_RS16290]	6666666.269962.peg.1058	699	279.823	45.3452	312.907	248.679	217.927	236.828	345.624	316.975
locus_tag=F7O84_RS16285]	6666666.269962.peg.1059	1428	94.9359	17.5315	73.9457	85.1052	73.4372	130.961	94.6611	111.505
locus_tag=F7O84_RS07925]	6666666.269962.peg.106	297	354.7	32.7255	289.133	342.161	403.624	334.81	403.952	354.518
locus_tag=F7O84_RS16280]	6666666.269962.peg.1060	477	10.2422	4.92882	13.2077	17.7536	14.5518	4.73788	1.72272	9.47954
locus_tag=F7O84_RS16275]	6666666.269962.peg.1061	903	18.6237	4.66996	20.0204	24.5149	25.3457	14.3907	11.3751	16.0954
locus_tag=F7O84_RS16270]	6666666.269962.peg.1062	1743	2.2007	0.480087	2.2787	2.64238	3.12128	1.94489	1.17863	2.03832
locus_tag=F7O84_RS16265]	6666666.269962.peg.1063	120	46.6918	14.4906	49.0766	66.8565	67.2233	47.0827	6.84782	43.0642
locus_tag=F7O84_RS03670]	6666666.269962.peg.1064	120	139.326	74.3945	45.6526	100.285	109.433	329.579	78.7499	172.257
locus_tag=F7O84_RS16260]	6666666.269962.peg.1065	2307	1.17	0.406335	1.30606	1.09479	1.46372	1.95923	0.356194	0.840004
locus_tag=F7O84_RS16255]	6666666.269962.peg.1066	300	0.443159	0.443159	0.913053	0.495233	1.25067	0	0	0
locus_tag=F7O84_RS02185]	6666666.269962.peg.1067	144	2.67697	2.13383	0	2.06347	3.90833	7.84711	0	2.24293
locus_tag=F7O84_RS16250]	6666666.269962.peg.1068	696	0.402502	0.536669	0	1.06731	1.3477	0	0	0
locus_tag=F7O84_RS16245]	6666666.269962.peg.1069	414	0.562061	0.629793	1.65408	0.358865	1.35942	0	0	0
locus_tag=F7O84_RS07920]	6666666.269962.peg.107	450	1054.56	88.7765	1066.14	1032.4	942.168	966.764	1309.3	1010.57
locus_tag=F7O84_RS16240]	6666666.269962.peg.1070	1161	1.76231	0.590868	1.41559	2.68731	1.93902	2.43321	0.707785	1.39096
locus_tag=F7O84_RS16235]	6666666.269962.peg.1071	285	29.0984	6.95566	33.6388	36.4909	24.3551	37.6661	12.9748	29.465
locus_tag=F7O84_RS16230]	6666666.269962.peg.1072	549	176.905	16.7878	191.342	166.701	147.961	165.69	202.067	187.67
locus_tag=F7O84_RS16225]	6666666.269962.peg.1073	1455	140.335	24.5767	164.82	157.658	172.257	118.046	120.013	109.214
locus_tag=F7O84_RS16220]	6666666.269962.peg.1074	633	197.548	80.7774	248.169	285.404	301.404	116.033	122.028	112.253
locus_tag=F7O84_RS16215]	6666666.269962.peg.1075	1974	18.7673	1.95645	18.2472	23.2564	20.1475	16.6006	16.0268	18.3252
locus_tag=F7O84_RS16210]	6666666.269962.peg.1076	768	21.1653	6.15376	24.0746	29.7914	28.0911	12.5063	14.4446	18.0836
locus_tag=F7O84_RS16205]	6666666.269962.peg.1077	747	147.403	11.7212	167.943	151.354	140.135	158.077	119.906	147.006
locus_tag=F7O84_RS16200]	6666666.269962.peg.1078	675	85.3609	17.8391	94.5517	99.0466	92.5493	108.813	53.5652	63.6393
locus_tag=F7O84_RS16195]	6666666.269962.peg.1079	381	97.5655	7.36873	116.109	100.216	98.4776	90.458	97.0557	83.0766
locus_tag=F7O84_RS07915]	6666666.269962.peg.108	642	188.329	33.4497	154.878	147.876	161.885	225.293	229.754	210.29
locus_tag=F7O84_RS16190]	6666666.269962.peg.1080	435	70.0242	14.107	87.2123	55.3295	58.2206	89.6194	75.5622	54.2015
locus_tag=F7O84_RS16185]	6666666.269962.peg.1081	297	6.91535	2.08101	7.3782	9.50447	10.1064	5.70699	5.53359	3.26244
locus_tag=F7O84_RS10595]	6666666.269962.peg.1082	525	0.42163	0.42163	0.782616	1.13196	0	0	0	0.615203
locus_tag=F7O84_RS10590]	6666666.269962.peg.1083	657	22.6121	3.77732	21.0544	26.4577	22.2721	30.0985	15.6343	20.1556
locus_tag=F7O84_RS10585]	6666666.269962.peg.1084	435	69.3797	22.7719	57.6168	41.6679	40.5388	109.102	91.6191	75.7336
locus_tag=F7O84_RS10580]	6666666.269962.peg.1085	3876	59.0553	6.80167	54.133	55.2729	68.3413	52.9133	70.1743	53.4969
locus_tag=F7O84_RS10575]	6666666.269962.peg.1086	345	43.6018	5.76961	47.2405	30.5753	46.2203	45.8544	52.4007	39.3195
locus_tag=F7O84_RS13855]	6666666.269962.peg.1087	528	49.2231	7.99797	45.912	46.4281	66.7969	55.6431	42.0207	38.5375
locus_tag=F7O84_RS13850]	6666666.269962.peg.1088	654	80.656	19.7939	60.94	83.1446	92.9394	125.266	44.6051	77.0414
locus_tag=F7O84_RS13845]	6666666.269962.peg.1089	471	28.1801	11.783	12.2128	18.6107	19.1185	61.1775	30.5317	27.4294
locus_tag=F7O84_RS07910]	6666666.269962.peg.109	276	16.8635	3.57719	14.3905	16.1489	14.2739	24.5649	11.9093	19.8938
locus_tag=F7O84_RS13840]	6666666.269962.peg.1090	1650	160.668	2.41836	166.425	162.166	160.199	157.17	158.122	159.925
locus_tag=F7O84_RS13835]	6666666.269962.peg.1091	672	776.299	93.9317	899.601	898.715	812.374	596.941	773.437	676.723
locus_tag=F7O84_RS13830]	6666666.269962.peg.1092	1875	64.5874	14.8509	62.0145	84.15	81.2432	72.9216	29.1443	58.0505
locus_tag=F7O84_RS17150]	6666666.269962.peg.1093	141	41.0625	6.96017	44.6813	37.9327	50.5588	44.0774	23.3117	45.813
locus_tag=F7O84_RS17155]	6666666.269962.peg.1094	1398	40.3598	10.7433	34.3864	38.5772	62.3991	26.6734	50.5504	29.572
locus_tag=F7O84_RS17160]	6666666.269962.peg.1095	216	45.8984	8.91137	65.9427	51.5868	46.9	26.157	39.9456	44.8585
locus_tag=F7O84_RS17165]	6666666.269962.peg.1096	666	61.3148	3.6904	56.7573	58.8926	57.463	65.3219	61.0752	68.3789
locus_tag=F7O84_RS17170]	6666666.269962.peg.1097	1014	116.448	36.6497	148.979	166.006	144.308	81.9071	76.5821	80.9046
locus_tag=F7O84_RS17175]	6666666.269962.peg.1098	768	100.976	15.4001	92.1969	87.4396	144.364	92.694	103.787	85.3714
locus_tag=F7O84_RS17180]	6666666.269962.peg.1099	2214	78.4476	12.6355	84.9337	96.2953	92.0205	58.6938	63.4676	75.2748
locus_tag=F7O84_RS12620]	6666666.269962.peg.11	144	9.73087	4.99196	10.4621	13.4126	14.3305	15.6942	0	4.48585
locus_tag=F7O84_RS07905]	6666666.269962.peg.110	1335	113.842	13.3454	106.694	102.051	92.746	124.848	133.571	123.144
locus_tag=F7O84_RS17185]	6666666.269962.peg.1100	420	0.798447	0.590868	0.65218	2.47617	0.893333	0	0	0.769003
locus_tag=F7O84_RS17195]	6666666.269962.peg.1101	267	6.0699	2.13157	8.72016	7.23374	7.02621	2.11607	7.69418	3.629
locus_tag=F7O84_RS17200]	6666666.269962.peg.1102	1680	112.319	11.9134	102.555	113.638	103.627	97.1921	146.739	110.16
locus_tag=F7O84_RS17205]	6666666.269962.peg.1103	474	132.061	25.0161	83.7928	107.196	142.481	150.188	178.563	130.146
locus_tag=F7O84_RS17210]	6666666.269962.peg.1104	1083	0.594661	0.41046	1.01169	0.960286	0.173222	1.04338	0.379381	0
locus_tag=F7O84_RS17215]	6666666.269962.peg.1105	1002	7.25132	2.28176	5.46738	6.22748	5.61676	14.0966	5.33064	6.76907
locus_tag=F7O84_RS17225]	6666666.269962.peg.1106	660	49.6017	14.778	67.6489	58.9778	66.5127	34.2419	35.4842	34.745
locus_tag=F7O84_RS17230]	6666666.269962.peg.1107	678	54.5621	24.3681	64.8429	75.3806	96.5669	27.4996	32.1181	30.9643
locus_tag=F7O84_RS17235]	6666666.269962.peg.1108	756	81.4629	21.7664	110.69	99.2431	99.7555	52.3141	67.3913	59.3841
locus_tag=F7O84_RS17240]	6666666.269962.peg.1109	915	392.514	40.2402	445.749	459.998	386.271	342.7	365.966	354.397
locus_tag=F7O84_RS07900]	6666666.269962.peg.111	549	121.244	18.2161	105.525	110.954	92.6039	131.729	143.692	142.959
locus_tag=F7O84_RS17245]	6666666.269962.peg.1110	801	23.385	2.01771	24.9636	27.8221	23.4207	23.2768	17.4401	23.3869
locus_tag=F7O84_RS17250]	6666666.269962.peg.1111	2316	9.46673	1.35903	8.81119	12.1242	10.7732	6.58669	9.57985	8.92522
locus_tag=F7O84_RS17255]	6666666.269962.peg.1112	765	32.8361	3.43665	31.5093	29.714	26.9751	35.4505	37.0588	36.309
locus_tag=F7O84_RS17260]	6666666.269962.peg.1113	1413	26.635	2.86893	30.6289	26.7068	27.0845	28.7894	18.0282	28.5723
locus_tag=F7O84_RS17265]	6666666.269962.peg.1114	660	22.8042	4.93797	18.2611	22.7357	20.4654	35.954	14.9407	24.4683
locus_tag=F7O84_RS17270]	6666666.269962.peg.1115	3312	76.3717	5.19042	76.9148	73.2084	69.5003	83.4182	70.8353	84.3535
locus_tag=F7O84_RS17275]	6666666.269962.peg.1116	1134	534.176	57.4709	551.455	494.054	412.422	523.639	605.434	618.051
locus_tag=F7O84_RS17280]	6666666.269962.peg.1117	1290	192.904	24.2804	227.732	230.917	191.09	175.191	147.467	185.026
locus_tag=F7O84_RS17285]	6666666.269962.peg.1118	753	37.9645	1.96622	40.5599	37.6851	37.8688	41.2677	34.3755	36.0298
locus_tag=F7O84_RS17290]	6666666.269962.peg.1119	888	17.5297	1.42115	16.8113	17.2328	18.591	16.5426	15.2688	20.7319
locus_tag=F7O84_RS07895]	6666666.269962.peg.112	897	68.7782	5.24025	70.5402	74.0365	75.0818	71.1751	64.5848	57.2509
locus_tag=F7O84_RS17295]	6666666.269962.peg.1120	828	7.1735	1.8256	8.76663	8.79218	7.25024	3.41179	5.45841	9.36178
locus_tag=F7O84_RS17300]	6666666.269962.peg.1121	1083	1.18705	0.304816	0.505846	1.09747	1.38578	1.04338	1.8969	1.19291
locus_tag=F7O84_RS17305]	6666666.269962.peg.1122	675	49.1956	4.65185	49.9135	52.8249	58.0865	45.1993	49.913	39.2363
locus_tag=F7O84_RS17310]	6666666.269962.peg.1123	708	149.369	11.3195	142.955	133.881	153.154	161.198	167.714	137.313
locus_tag=F7O84_RS17315]	6666666.269962.peg.1124	1725	25.3966	3.375	24.2951	20.3261	21.7507	29.4778	31.4404	25.0896
locus_tag=F7O84_RS17320]	6666666.269962.peg.1125	498	6.11251	3.05792	3.02517	3.87833	2.26024	12.4797	6.60031	8.43124
locus_tag=F7O84_RS17325]	6666666.269962.peg.1126	1278	47.0458	6.26274	42.2233	39.7581	40.3677	49.5142	60.1194	50.2921
locus_tag=F7O84_RS17330]	6666666.269962.peg.1127	1230	52.3443	3.48508	49.4385	50.4896	51.2468	49.1497	62.7995	50.9418
locus_tag=F7O84_RS17335]	6666666.269962.peg.1128	1197	78.1365	5.44699	74.3714	83.1594	85.4151	78.8251	65.5606	81.4874
locus_tag=F7O84_RS17340]	6666666.269962.peg.1129	1569	87.6159	4.98849	97.9393	90.4297	89.1966	87.8636	74.6321	85.6343
locus_tag=F7O84_RS07890]	6666666.269962.peg.113	765	47.9558	16.8883	29.0028	39.036	38.7461	79.025	34.3734	67.5517
locus_tag=F7O84_RS17345]	6666666.269962.peg.1130	711	80.5984	12.9801	98.8177	96.957	84.9608	74.6965	55.476	72.6822
locus_tag=F7O84_RS17350]	6666666.269962.peg.1131	723	39.3836	10.7398	28.7934	36.1664	37.6238	60.9535	22.7314	50.0331
locus_tag=F7O84_RS17355]	6666666.269962.peg.1132	216	4.97725	2.32131	5.70658	5.50259	7.81666	7.84711	0	2.99057
locus_tag=F7O84_RS17360]	6666666.269962.peg.1133	1407	5851.88	2397.77	3595.56	3695.03	3071.73	8051.64	7827.83	8869.48
locus_tag=F7O84_RS17365]	6666666.269962.peg.1134	1002	226.7	91.5901	123.426	155.984	136.113	375.534	216.506	352.636
locus_tag=F7O84_RS17370]	6666666.269962.peg.1135	1494	3066.74	1236.15	1712.62	1954.38	1824.77	4929.12	3434.91	4544.65
locus_tag=F7O84_RS17375]	6666666.269962.peg.1136	1482	8426.49	2211.82	6327.51	6379.88	5936.61	9188.93	12036.6	10689.3
locus_tag=F7O84_RS17380]	6666666.269962.peg.1137	945	901.166	175.575	913.487	1126.62	1190.12	716.852	718.26	741.661
locus_tag=F7O84_RS17385]	6666666.269962.peg.1138	3756	15.5211	3.14049	18.9612	19.3426	17.6811	11.7331	11.0484	14.3605
locus_tag=F7O84_RS17390]	6666666.269962.peg.1139	1032	2419.32	815.589	1783.64	1603.46	1424.09	3260.2	2839.46	3605.06
locus_tag=F7O84_RS07885]	6666666.269962.peg.114	1425	181.384	10.4353	187.704	205.287	182.466	169.299	169.249	174.297
locus_tag=F7O84_RS17395]	6666666.269962.peg.1140	963	1752.02	245.271	1722.14	1504.98	1293.13	1887.41	1917.39	2187.08
locus_tag=F7O84_RS17400]	6666666.269962.peg.1141	786	131.74	14.017	147.587	142.899	146.786	115.011	125.979	112.181
locus_tag=F7O84_RS17405]	6666666.269962.peg.1142	411	7.60056	2.85486	4.66523	5.78374	6.39026	15.1214	4.99841	8.64427
locus_tag=F7O84_RS17410]	6666666.269962.peg.1143	477	106.864	9.51699	113.127	119.603	116.414	88.8352	101.641	101.566
locus_tag=F7O84_RS17415]	6666666.269962.peg.1144	1794	8.09354	2.04691	5.80201	8.94401	11.0845	10.3928	5.49658	6.8413
locus_tag=F7O84_RS17420]	6666666.269962.peg.1145	420	1364.72	197.849	1231.97	1210.49	1058.15	1505.3	1608.26	1574.15
locus_tag=F7O84_RS17425]	6666666.269962.peg.1146	2319	38.2201	4.31883	37.7387	36.3897	35.6755	46.7781	30.1198	42.6185
locus_tag=F7O84_RS17430]	6666666.269962.peg.1147	972	10.6904	1.31276	9.72232	11.0052	7.72016	11.6253	13.1039	10.9654
locus_tag=F7O84_RS17435]	6666666.269962.peg.1148	924	12.5829	1.2824	11.8578	13.9887	15.0242	12.2293	11.5613	10.836
locus_tag=F7O84_RS17440]	6666666.269962.peg.1149	1662	231.541	50.0653	172.31	178.874	193.244	252.581	293.937	298.301
locus_tag=F7O84_RS07880]	6666666.269962.peg.115	1875	1556.99	128.555	1507.34	1502.89	1275.08	1622.66	1721.93	1712.06
locus_tag=F7O84_RS17445]	6666666.269962.peg.1150	1032	110.65	18.4851	95.6847	92.2803	88.5282	129.751	126.207	131.446
locus_tag=F7O84_RS17450]	6666666.269962.peg.1151	267	44.4454	8.38959	55.3987	40.0638	33.0232	50.7858	52.3204	35.0804
locus_tag=F7O84_RS17455]	6666666.269962.peg.1152	1557	6.63712	2.89153	4.04628	3.81682	3.37366	10.5233	6.86102	11.2017
locus_tag=F7O84_RS17460]	6666666.269962.peg.1153	873	115.55	36.1681	130.839	147.889	176.426	87.3699	75.3025	75.4733
locus_tag=F7O84_RS17465]	6666666.269962.peg.1154	675	253.481	77.2405	311.452	331.916	348.797	185.82	182.609	160.294
locus_tag=F7O84_RS17470]	6666666.269962.peg.1155	642	59.1235	6.10762	67.8389	68.7309	58.4423	54.5631	51.8387	53.3271
locus_tag=F7O84_RS17475]	6666666.269962.peg.1156	849	171.455	28.2066	159.865	199.493	228.037	138.42	158.734	144.181
locus_tag=F7O84_RS17480]	6666666.269962.peg.1157	450	75.5595	12.29	65.1311	72.6342	83.7946	97.9319	52.0434	81.8219
locus_tag=F7O84_RS17485]	6666666.269962.peg.1158	2724	0.981658	0.22553	0.905008	0.981739	1.58399	0.414825	1.05583	0.94855
locus_tag=F7O84_RS17490]	6666666.269962.peg.1159	2772	1.27051	0.459721	0.988152	1.12553	1.21818	2.64967	0.592885	1.04864
locus_tag=F7O84_RS07875]	6666666.269962.peg.116	549	69.2963	9.72094	49.8936	59.5362	81.6691	71.0099	83.0719	70.597
locus_tag=F7O84_RS17495]	6666666.269962.peg.1160	741	71.9779	6.76462	73.3769	83.6082	79.2426	69.385	60.4383	65.8167
locus_tag=F7O84_RS17500]	6666666.269962.peg.1161	1377	6.31763	0.799709	5.8682	6.58153	5.99448	8.20613	6.56436	4.69109
locus_tag=F7O84_RS17505]	6666666.269962.peg.1162	921	5.87106	0.95711	5.79952	8.38831	4.48121	6.13455	4.46112	5.96165
locus_tag=F7O84_RS17510]	6666666.269962.peg.1163	861	10.4222	1.85161	8.27156	13.2867	9.80487	11.1555	7.6352	12.3791
locus_tag=F7O84_RS17515]	6666666.269962.peg.1164	459	1179.17	73.1313	1326.61	1136.77	1142.36	1158.29	1059.85	1251.11
locus_tag=F7O84_RS17520]	6666666.269962.peg.1165	1731	25.2581	6.51393	19.4637	18.4532	18.3156	30.0285	36.5534	28.7343
locus_tag=F7O84_RS17525]	6666666.269962.peg.1166	597	10.4065	2.4055	6.88231	7.46582	11.941	16.0885	10.3233	9.73813
locus_tag=F7O84_RS13250]	6666666.269962.peg.1167	120	742.854	143.929	897.074	815.896	947.379	663.865	451.956	680.952
locus_tag=F7O84_RS17530]	6666666.269962.peg.1168	3129	380.165	106.817	489.836	494.046	477.064	258.751	287.963	273.332
locus_tag=F7O84_RS10580]	6666666.269962.peg.1169	132	7.10925	2.97641	9.33804	10.1298	2.84242	8.56048	9.33794	2.44683
locus_tag=F7O84_RS07870]	6666666.269962.peg.117	477	371.77	119.441	547.257	493.364	433.013	233.34	267.022	256.625
locus_tag=F7O84_RS17535]	6666666.269962.peg.1170	2463	39.0997	1.868	40.7037	41.0181	40.8256	39.4554	34.6979	37.8975
locus_tag=F7O84_RS17540]	6666666.269962.peg.1171	1437	106.387	8.37139	89.3038	113.935	106.398	121.098	98.357	109.234
locus_tag=F7O84_RS17545]	6666666.269962.peg.1172	912	8.36207	1.36326	8.25952	7.33075	8.63947	9.91214	5.40618	10.6244
locus_tag=F7O84_RS17550]	6666666.269962.peg.1173	840	13.9554	3.34794	9.78271	11.3196	10.72	17.4878	17.1196	17.3026
locus_tag=F7O84_RS17555]	6666666.269962.peg.1174	186	46.8249	13.6433	49.3343	49.5233	59.5075	69.8646	11.0449	41.675
locus_tag=F7O84_RS17560]	6666666.269962.peg.1175	669	190.084	25.0456	187.114	226.963	215.361	190.864	117.918	202.286
locus_tag=F7O84_RS17565]	6666666.269962.peg.1176	444	189.84	111.649	83.2852	64.2464	87.0396	399.566	285.943	218.958
locus_tag=F7O84_RS17570]	6666666.269962.peg.1177	921	1636.83	186.708	1379.69	1403.27	1567.41	1775.34	2038.29	1656.99
locus_tag=F7O84_RS17575]	6666666.269962.peg.1178	1161	19.1457	7.39253	10.4989	12.1569	12.6036	36.9848	19.818	22.8118
locus_tag=F7O84_RS17580]	6666666.269962.peg.1179	990	145.545	13.2526	159.923	143.768	167.892	141.533	148.577	111.575
locus_tag=F7O84_RS07865]	6666666.269962.peg.118	1137	0.97945	0.41975	1.44547	1.30668	0.329991	0.496915	1.44545	0.852194
locus_tag=F7O84_RS17585]	6666666.269962.peg.1180	258	28.0297	5.84458	22.8263	25.3375	34.1752	39.418	23.8878	22.5336
locus_tag=F7O84_RS17590]	6666666.269962.peg.1181	981	352.571	12.9544	353.354	351.055	377.112	346.137	321.659	366.111
locus_tag=F7O84_RS17595]	6666666.269962.peg.1182	342	72.1635	20.5107	82.0946	87.3174	108.61	69.385	46.8535	38.72
locus_tag=F7O84_RS17600]	6666666.269962.peg.1183	783	164.13	22.0564	176.663	164.888	209.403	171.734	139.58	122.51
locus_tag=F7O84_RS17605]	6666666.269962.peg.1184	960	250.735	64.7624	309.725	301.628	335.139	171.852	217.846	168.219
locus_tag=F7O84_RS08860]	6666666.269962.peg.1185	117	169.754	41.7041	204.852	208.252	221.272	140.041	147.492	96.6184
locus_tag=F7O84_RS17610]	6666666.269962.peg.1186	483	140.832	11.8408	146.315	149.8	160.023	142.71	128.45	117.691
locus_tag=F7O84_RS17615]	6666666.269962.peg.1187	1491	607.245	118.392	714.459	692.928	769.524	513.836	475.076	477.648
locus_tag=F7O84_RS17620]	6666666.269962.peg.1188	1770	37.4431	7.73393	33.8139	39.9544	47.3769	48.1999	19.731	35.5827
locus_tag=F7O84_RS17625]	6666666.269962.peg.1189	591	14.035	11.2747	18.7709	22.8762	34.2822	2.86798	4.86647	0.5465
locus_tag=F7O84_RS07860]	6666666.269962.peg.119	864	1.32661	0.437159	1.58516	0.687824	1.73704	0.653926	1.42663	1.86911
locus_tag=F7O84_RS17630]	6666666.269962.peg.1190	267	5.38847	2.65378	2.0518	4.45153	13.3498	4.23215	4.61651	3.629
locus_tag=F7O84_RS17635]	6666666.269962.peg.1191	582	4.08213	1.6757	3.0592	2.0422	4.51271	7.76621	2.11788	4.99456
locus_tag=F7O84_RS17640]	6666666.269962.peg.1192	705	2.18569	0.9799	2.52546	4.00401	0.266099	2.40422	1.16559	2.74878
locus_tag=F7O84_RS17645]	6666666.269962.peg.1193	1092	1.60495	0.963672	1.00335	0.544212	1.71795	3.62174	0.376254	2.36616
locus_tag=F7O84_RS17650]	6666666.269962.peg.1194	198	2.39155	1.3638	0.691706	3.75177	3.7899	2.85349	0	3.26244
locus_tag=F7O84_RS17655]	6666666.269962.peg.1195	1251	169.12	83.5738	90.4294	77.4321	88.7763	286.335	229.574	242.171
locus_tag=F7O84_RS17660]	6666666.269962.peg.1196	1587	80.712	5.68438	72.5782	77.7956	74.7089	81.1709	84.4004	93.6178
locus_tag=F7O84_RS17665]	6666666.269962.peg.1197	333	152.578	24.0871	133.668	129.385	125.63	184.937	192.479	149.367
locus_tag=F7O84_RS17670]	6666666.269962.peg.1198	279	5.74155	4.93709	5.39977	1.59753	8.06881	18.2255	0	1.15764
locus_tag=F7O84_RS17675]	6666666.269962.peg.1199	516	43.763	10.7187	35.832	36.2787	30.1759	68.9816	40.6092	50.7006
locus_tag=F7O84_RS12625]	6666666.269962.peg.12	933	24.1534	8.72674	34.2028	30.2554	34.1822	21.8003	9.24786	15.2317
locus_tag=F7O84_RS07855]	6666666.269962.peg.120	909	0.930461	0.3981	0.602675	2.12476	0.619141	0.621553	0.904003	0.71063
locus_tag=F7O84_RS17680]	6666666.269962.peg.1200	1812	72.7393	3.13099	73.3163	66.1677	74.0253	71.7153	80.2692	70.9418
locus_tag=F7O84_RS17685]	6666666.269962.peg.1201	2046	92.1098	4.77974	86.9542	82.9261	94.1667	96.0983	97.7973	94.7159
locus_tag=F7O84_RS17690]	6666666.269962.peg.1202	1743	76.4521	27.3713	50.21	47.3071	49.7253	118.314	97.3546	95.8011
locus_tag=F7O84_RS17695]	6666666.269962.peg.1203	465	14.9985	4.0285	13.5485	10.2242	13.717	18.2255	23.8569	10.4188
locus_tag=F7O84_RS17700]	6666666.269962.peg.1204	222	11.1149	4.59799	4.93542	8.70004	5.91531	15.2701	12.9553	18.9133
locus_tag=F7O84_RS17705]	6666666.269962.peg.1205	399	6.09134	1.67497	7.20831	3.3512	4.23158	9.91214	6.17849	5.66634
locus_tag=F7O84_RS17710]	6666666.269962.peg.1206	1545	58.5064	17.5196	42.9046	34.5221	45.5339	87.7657	74.4618	65.8506
locus_tag=F7O84_RS17715]	6666666.269962.peg.1207	372	152.605	62.5847	93.1461	88.6627	88.2526	250.601	157.942	237.027
locus_tag=F7O84_RS17720]	6666666.269962.peg.1208	483	175.031	35.1592	123.064	148.57	147.982	232.781	177.788	220.002
locus_tag=F7O84_RS17725]	6666666.269962.peg.1209	810	12571.7	2960.14	10894.1	9816.8	8123.77	16382.7	13159	17053.8
locus_tag=F7O84_RS07850]	6666666.269962.peg.121	1428	4.52145	0.722153	4.50772	3.3293	5.12352	3.56087	5.17902	5.42826
locus_tag=F7O84_RS17730]	6666666.269962.peg.1210	309	17.189	9.94566	23.4912	24.5212	33.3916	12.7992	2.65935	6.27148
locus_tag=F7O84_RS17735]	6666666.269962.peg.1211	1869	69.7708	11.6668	67.4164	62.401	60.6262	97.6417	53.6394	76.9003
locus_tag=F7O84_RS17740]	6666666.269962.peg.1212	1245	45.5028	11.4199	49.7229	60.6213	60.4237	41.2966	25.4112	35.5409
locus_tag=F7O84_RS17750]	6666666.269962.peg.1213	363	82.8763	27.1048	59.6125	72.8525	71.3189	157.202	46.4067	89.8653
locus_tag=F7O84_RS17755]	6666666.269962.peg.1214	1287	144.171	54.2044	150.154	217.141	227.831	132.578	42.4597	94.8617
locus_tag=F7O84_RS17765]	6666666.269962.peg.1215	207	1411.04	219.289	1883.01	1596.95	1377.54	1244.62	1161.15	1202.99
locus_tag=F7O84_RS17770]	6666666.269962.peg.1216	516	6186.47	2325.55	8974.99	8593.16	7967.9	3569.52	4243.26	3769.99
locus_tag=F7O84_RS17775]	6666666.269962.peg.1217	426	1992.56	656.171	2416.05	2739.48	2790.66	1294.44	1193.06	1521.65
locus_tag=F7O84_RS17780]	6666666.269962.peg.1218	693	10300.2	3945.13	12944.2	14420.3	15371.5	5393.1	7208.3	6463.82
locus_tag=F7O84_RS17785]	6666666.269962.peg.1219	2061	11.5945	3.6826	13.224	15.859	16.7484	7.12751	6.57869	10.0295
locus_tag=F7O84_RS07845]	6666666.269962.peg.122	732	28.1729	2.85928	33.4911	24.5587	26.3972	26.2428	31.4326	26.9151
locus_tag=F7O84_RS17790]	6666666.269962.peg.1220	1587	8.56815	3.83619	9.49298	12.8255	14.8945	6.40823	3.10676	4.68089
locus_tag=F7O84_RS17795]	6666666.269962.peg.1221	1191	84.9258	25.7911	107.519	116.261	108.37	66.4138	47.262	63.7285
locus_tag=F7O84_RS17800]	6666666.269962.peg.1222	1194	275.448	121.535	335.168	418.833	436.947	153.314	154.506	153.917
locus_tag=F7O84_RS17805]	6666666.269962.peg.1223	489	3498.57	347.834	4161.11	3879.53	3322.7	2918.55	3261.75	3447.78
locus_tag=F7O84_RS17810]	6666666.269962.peg.1224	372	10002.6	5241.36	11702.2	15615.8	18414	4158.46	5650.56	4474.85
locus_tag=F7O84_RS17815]	6666666.269962.peg.1225	3861	1339.64	314.945	1717.45	1624.26	1622.03	949.701	1073.2	1051.17
locus_tag=F7O84_RS17820]	6666666.269962.peg.1226	3696	2357.37	703.518	2896.98	3066.55	3219.14	1528.35	1751.98	1681.23
locus_tag=F7O84_RS17825]	6666666.269962.peg.1227	918	39.8832	6.1544	38.939	35.2813	35.9669	48.6213	30.8823	49.6082
locus_tag=F7O84_RS17830]	6666666.269962.peg.1228	1047	79.1405	17.7421	93.3982	94.222	103.028	53.9629	65.1426	65.0898
locus_tag=F7O84_RS17835]	6666666.269962.peg.1229	999	133.075	13.0505	144.635	141.283	148.164	108.021	137.368	118.976
locus_tag=F7O84_RS07840]	6666666.269962.peg.123	996	22.5844	7.86974	13.7508	15.5133	14.8799	34.0357	23.9261	33.4007
locus_tag=F7O84_RS17840]	6666666.269962.peg.1230	990	161.235	16.6701	194.646	177.834	158.418	137.538	153.142	145.831
locus_tag=F7O84_RS17845]	6666666.269962.peg.1231	1689	4186.82	447.909	4836.26	4505.57	4562.37	3343.45	4090.45	3782.84
locus_tag=F7O84_RS17850]	6666666.269962.peg.1232	1029	1444.14	527.731	878.314	931.269	939.64	2174.31	1648.67	2092.63
locus_tag=F7O84_RS17855]	6666666.269962.peg.1233	1185	93.3127	15.3618	81.2501	99.2974	104.011	107.277	59.29	108.751
locus_tag=F7O84_RS17860]	6666666.269962.peg.1234	420	19196.2	3347.87	25324.8	23111.1	18736.8	13898.8	18698.5	15407
locus_tag=F7O84_RS17865]	6666666.269962.peg.1235	471	14040.2	5564.22	19052.3	19611.9	20149.3	6987.43	10049.3	8391.34
locus_tag=F7O84_RS17870]	6666666.269962.peg.1236	2118	5565.7	2413.93	7769.55	8109.48	8059.88	2759.34	3525.95	3170.04
locus_tag=F7O84_RS17875]	6666666.269962.peg.1237	1194	20629.6	1716.26	23025	22674.6	20250.7	16479.9	21338	20009.4
locus_tag=F7O84_RS17880]	6666666.269962.peg.1238	351	86.2822	16.5514	69.0642	93.544	88.7224	109.457	53.8461	103.06
locus_tag=F7O84_RS17885]	6666666.269962.peg.1239	1908	183.37	17.1804	208.954	207.359	185.338	180.335	143.201	175.033
locus_tag=F7O84_RS07835]	6666666.269962.peg.124	840	42.3752	18.6741	55.4353	60.4892	67.2233	26.2318	21.0326	23.8391
locus_tag=F7O84_RS17890]	6666666.269962.peg.1240	693	462.555	133.956	313.244	319.007	353.543	730.495	490.909	568.13
locus_tag=F7O84_RS17895]	6666666.269962.peg.1241	666	133.892	11.5124	143.333	141.878	127.32	151.004	119.066	120.754
locus_tag=F7O84_RS17900]	6666666.269962.peg.1242	1464	1022.57	70.9195	1003.42	1141.78	1116.12	918.498	973.85	981.74
locus_tag=F7O84_RS17905]	6666666.269962.peg.1243	246	64.2402	16.7706	75.7166	83.3441	79.3105	68.9014	21.7126	56.4561
locus_tag=F7O84_RS17910]	6666666.269962.peg.1244	693	65.5182	17.1723	58.1033	81.0381	101.515	59.5157	44.4664	48.4705
locus_tag=F7O84_RS17915]	6666666.269962.peg.1245	942	133.228	16.6357	118.639	139.265	143.588	166.739	101.191	129.947
locus_tag=F7O84_RS17920]	6666666.269962.peg.1246	1335	1.36735	0.713663	0.410361	1.66932	0.281048	1.26964	2.15437	2.41934
locus_tag=F7O84_RS17925]	6666666.269962.peg.1247	813	1.03437	0.445937	0.842299	1.46194	0.923	1.38989	0	1.58908
locus_tag=F7O84_RS17930]	6666666.269962.peg.1248	1281	5.02524	1.7754	3.95585	3.47939	2.92896	4.41055	7.0563	8.32036
locus_tag=F7O84_RS17935]	6666666.269962.peg.1249	1866	14.0762	2.26787	13.3582	11.2263	12.3659	19.3781	12.5507	15.5779
locus_tag=F7O84_RS07830]	6666666.269962.peg.125	2100	6.41871	0.834308	6.45659	4.52784	5.80666	8.6094	6.65217	6.45963
locus_tag=F7O84_RS17940]	6666666.269962.peg.1250	1986	82.4763	17.5709	65.9963	68.0758	60.6441	103.838	101.166	95.138
locus_tag=F7O84_RS17945]	6666666.269962.peg.1251	675	2.83747	1.41736	1.6232	1.98093	1.66755	4.18512	1.82609	5.74189
locus_tag=F7O84_RS17950]	6666666.269962.peg.1252	1374	3.56514	0.85344	2.19292	4.32518	3.54992	4.93443	2.39225	3.99613
locus_tag=F7O84_RS17955]	6666666.269962.peg.1253	984	2.6041	1.08736	2.64451	2.56676	5.14756	1.14836	0.8351	3.28233
locus_tag=F7O84_RS17960]	6666666.269962.peg.1254	2835	107.563	16.9918	130.436	114.192	129.037	89.2827	98.6956	83.7359
locus_tag=F7O84_RS18870]	6666666.269962.peg.1255	324	38.0554	6.70962	32.9713	44.9378	40.5308	48.8265	29.1666	31.8994
locus_tag=F7O84_RS18865]	6666666.269962.peg.1256	711	2779.32	463.567	2316.92	2026.9	2603.44	3788.86	2872.62	3067.19
locus_tag=F7O84_RS18860]	6666666.269962.peg.1257	2142	272.308	26.9891	306.077	289.649	239.974	223.676	289.642	284.833
locus_tag=F7O84_RS18855]	6666666.269962.peg.1258	540	132.846	38.2976	156.994	191.765	164.671	121.369	62.3913	99.885
locus_tag=F7O84_RS18850]	6666666.269962.peg.1259	738	85.831	23.0277	97.9861	118.775	109.815	76.5572	52.3329	59.5196
locus_tag=F7O84_RS07825]	6666666.269962.peg.126	981	14.4327	2.02845	12.5649	13.7817	10.9003	14.3984	17.1719	17.7788
locus_tag=F7O84_RS18845]	6666666.269962.peg.1260	426	42.7323	16.0028	58.5125	58.2422	59.4507	41.1144	12.5383	26.536
locus_tag=F7O84_RS18840]	6666666.269962.peg.1261	1203	1022.82	74.6608	1015.63	968.236	928.643	954.803	1222.02	1047.61
locus_tag=F7O84_RS18835]	6666666.269962.peg.1262	1218	384.859	42.3956	328.789	350.81	348.092	445.314	384.557	451.591
locus_tag=F7O84_RS18830]	6666666.269962.peg.1263	444	164.874	14.8658	184.77	173.332	128.024	179.423	166.569	157.126
locus_tag=F7O84_RS18825]	6666666.269962.peg.1264	465	640.962	164.818	401.449	554.661	493.004	923.428	620.28	852.949
locus_tag=F7O84_RS18820]	6666666.269962.peg.1265	1002	1454.5	94.0345	1434.5	1517.87	1673.23	1327.34	1448.29	1325.77
locus_tag=F7O84_RS18815]	6666666.269962.peg.1266	2565	343.805	19.6469	368.211	350.602	371.543	335.911	312.197	324.366
locus_tag=F7O84_RS18810]	6666666.269962.peg.1267	159	11.6705	5.61242	13.7819	17.7536	5.89937	7.10682	5.16817	20.3133
locus_tag=F7O84_RS18805]	6666666.269962.peg.1268	576	12.3989	3.19345	7.371	13.9284	16.9361	13.7324	7.84646	14.579
locus_tag=F7O84_RS18800]	6666666.269962.peg.1269	528	452.996	158.093	345.507	371.706	381.595	886.01	238.896	494.259
locus_tag=F7O84_RS07820]	6666666.269962.peg.127	849	2.64093	0.450131	1.29053	3.67487	2.65159	2.66192	2.90367	2.66298
locus_tag=F7O84_RS05620]	6666666.269962.peg.1270	177	0	0	0	0	0	0	0	0
locus_tag=F7O84_RS00025]	6666666.269962.peg.1271	123	0.37116	0.618599	2.22696	0	0	0	0	0
locus_tag=F7O84_RS18795]	6666666.269962.peg.1272	1155	763.329	136.257	941.274	854.245	903.24	588.961	686.561	605.695
locus_tag=F7O84_RS18790]	6666666.269962.peg.1273	918	65.8766	5.80047	69.0757	54.5404	69.8901	75.7015	66.2404	59.8114
locus_tag=F7O84_RS18785]	6666666.269962.peg.1274	738	141.964	42.2087	119.513	91.7993	87.9533	185.268	192.63	174.62
locus_tag=F7O84_RS18780]	6666666.269962.peg.1275	1284	30.2641	6.24509	25.3863	22.5632	24.1075	38.7222	32.3192	38.4861
locus_tag=F7O84_RS18775]	6666666.269962.peg.1276	1371	19.5947	3.68136	15.5838	16.1465	16.0096	22.2535	26.3724	21.2023
locus_tag=F7O84_RS18770]	6666666.269962.peg.1277	1041	164.501	2.49472	162.481	161.272	167.957	166.078	166.953	162.266
locus_tag=F7O84_RS18765]	6666666.269962.peg.1278	2262	43.0018	11.1847	29.7892	33.7599	33.6718	63.4429	41.2322	56.1148
locus_tag=F7O84_RS18760]	6666666.269962.peg.1279	990	29.3236	2.5328	32.2335	29.1137	26.7188	24.5401	30.7114	32.6244
locus_tag=F7O84_RS07815]	6666666.269962.peg.128	864	2.52708	0.746227	4.27993	2.92325	1.95416	1.96178	1.42663	2.61675
locus_tag=F7O84_RS18755]	6666666.269962.peg.1280	1554	6.09155	0.71524	5.72861	6.30992	5.67387	4.72644	7.66745	6.443
locus_tag=F7O84_RS18750]	6666666.269962.peg.1281	1983	3.333	0.583487	3.72956	2.62226	2.93273	4.27377	2.69355	3.74613
locus_tag=F7O84_RS18745]	6666666.269962.peg.1282	2169	1.21513	0.387368	0.75772	1.64393	0.778423	1.82339	0.94714	1.34017
locus_tag=F7O84_RS18740]	6666666.269962.peg.1283	1692	1.73232	0.706895	1.69983	0.614651	0.776122	2.67136	2.91397	1.71799
locus_tag=F7O84_RS18735]	6666666.269962.peg.1284	873	0.574371	0.574371	0	0	0	1.29437	1.41192	0.739934
locus_tag=F7O84_RS18730]	6666666.269962.peg.1285	957	0.311587	0.298358	0	0.155245	0.196029	1.18076	0	0.337494
locus_tag=F7O84_RS18725]	6666666.269962.peg.1286	864	3.01155	0.779177	4.12142	3.26716	3.25694	1.30785	2.37772	3.73821
locus_tag=F7O84_RS18720]	6666666.269962.peg.1287	3384	39.4474	9.28663	28.8567	32.5765	29.0491	45.9139	48.0805	52.2077
locus_tag=F7O84_RS18715]	6666666.269962.peg.1288	951	20.3814	2.60039	18.0018	16.4036	18.9375	23.17	25.0583	20.717
locus_tag=F7O84_RS18710]	6666666.269962.peg.1289	282	1.04442	1.06879	0.971332	2.63422	2.66099	0	0	0
locus_tag=F7O84_RS07810]	6666666.269962.peg.129	750	3.56322	1.50439	3.83482	1.98093	0.750399	7.53322	3.83478	3.44513
locus_tag=F7O84_RS18705]	6666666.269962.peg.1290	1200	2375.27	262.139	1811.72	2161.57	2366.1	2851.8	2391.26	2669.17
locus_tag=F7O84_RS18850]	6666666.269962.peg.1291	138	119.758	51.1769	99.2448	170.102	222.945	77.7887	92.2967	56.1707
locus_tag=F7O84_RS18700]	6666666.269962.peg.1292	930	28.5081	4.92708	29.4533	36.1041	32.8804	30.3759	17.23	25.005
locus_tag=F7O84_RS18695]	6666666.269962.peg.1293	2739	34.822	3.60246	41.4024	38.1866	35.6844	29.2913	34.6516	29.7157
locus_tag=F7O84_RS18690]	6666666.269962.peg.1294	525	18.7647	5.06704	11.2175	11.6026	18.5813	26.9044	25.8261	18.4561
locus_tag=F7O84_RS18685]	6666666.269962.peg.1295	873	24.8412	7.83023	17.7277	17.1885	16.1168	36.2423	25.8852	35.8868
locus_tag=F7O84_RS18680]	6666666.269962.peg.1296	453	87.7992	6.50839	80.1188	87.8957	95.2494	99.7778	78.9087	84.845
locus_tag=F7O84_RS18675]	6666666.269962.peg.1297	684	78.6025	13.1786	73.8852	62.3385	61.1619	116.468	77.4885	80.2731
locus_tag=F7O84_RS18670]	6666666.269962.peg.1298	612	83.7974	7.94786	84.1441	77.4409	69.8901	87.703	103.389	80.2176
locus_tag=F7O84_RS02080]	6666666.269962.peg.1299	129	430.478	63.8277	400.257	426.131	283.581	420.459	554.196	498.243
locus_tag=F7O84_RS14750]	6666666.269962.peg.13	1410	4.36896	1.26262	3.59393	5.16307	5.72113	6.01055	3.20536	2.51971
locus_tag=F7O84_RS07805]	6666666.269962.peg.130	642	22.7349	4.84617	22.8263	15.7364	15.195	27.2815	30.7192	24.6512
locus_tag=F7O84_RS02085]	6666666.269962.peg.1300	2481	18.296	2.47709	16.2848	18.7434	21.5502	16.8518	22.0256	14.32
locus_tag=F7O84_RS02090]	6666666.269962.peg.1301	675	12.0111	2.58381	9.33343	11.2253	14.7301	9.20727	17.0435	10.5268
locus_tag=F7O84_RS02095]	6666666.269962.peg.1302	1032	414.96	127.975	467.276	539.286	622.242	242.53	351.15	267.273
locus_tag=F7O84_RS02100]	6666666.269962.peg.1303	672	293.713	46.9565	223.576	294.708	420.983	251.388	306.318	265.306
locus_tag=F7O84_RS02105]	6666666.269962.peg.1304	618	252.932	81.6352	177.957	233.913	497.838	196.559	249.314	162.013
locus_tag=F7O84_RS03430]	6666666.269962.peg.1305	1284	730.497	384.406	273.489	289.503	475.282	1687.5	852.778	804.435
locus_tag=F7O84_RS00025]	6666666.269962.peg.1306	168	535.72	264.886	229.894	226.392	356.216	1237.6	616.304	547.915
locus_tag=F7O84_RS02185]	6666666.269962.peg.1307	1542	690.082	358.362	259.35	291.263	444.546	1576.99	818.275	750.062
locus_tag=F7O84_RS17440]	6666666.269962.peg.1308	987	674.613	337.383	273.916	281.033	456.74	1498.06	781.359	756.568
locus_tag=F7O84_RS12450]	6666666.269962.peg.1309	669	187.703	15.9068	216.594	206.532	172.177	173.129	183.018	174.767
locus_tag=F7O84_RS07800]	6666666.269962.peg.131	669	10.0703	5.56436	8.59825	1.55454	3.36502	20.2688	11.6689	14.9663
locus_tag=F7O84_RS12445]	6666666.269962.peg.1310	219	167.2	12.8563	191.366	158.068	181.603	152.212	165.098	154.854
locus_tag=F7O84_RS12440]	6666666.269962.peg.1311	804	189.624	13.0171	197.09	197.908	172.667	212.926	169.151	188.004
locus_tag=F7O84_RS12435]	6666666.269962.peg.1312	453	58.3825	7.21125	71.0488	49.8513	50.5236	67.35	58.0478	53.4737
locus_tag=F7O84_RS12430]	6666666.269962.peg.1313	1794	9.31447	4.38674	11.2223	12.8363	17.045	5.66881	3.89341	5.22099
locus_tag=F7O84_RS12425]	6666666.269962.peg.1314	1419	22.13	8.5205	16.0219	26.3845	33.3158	32.2511	6.37007	18.4366
locus_tag=F7O84_RS12420]	6666666.269962.peg.1315	1233	51.3418	18.0655	42.5425	64.4646	71.3579	72.3996	17.9943	39.2921
locus_tag=F7O84_RS12415]	6666666.269962.peg.1316	234	8985.72	1319.02	7896.73	8761.18	12942.8	8528	8747.65	7037.96
locus_tag=F7O84_RS12410]	6666666.269962.peg.1317	186	6.87453	6.68084	4.418	9.58516	24.2064	3.03759	0	0
locus_tag=F7O84_RS12405]	6666666.269962.peg.1318	858	34.3198	12.4679	28.0939	38.9606	57.9417	43.4609	22.028	15.4338
locus_tag=F7O84_RS12400]	6666666.269962.peg.1319	633	26.5239	7.56897	23.1509	33.0938	35.2676	33.9174	16.8761	16.8379
locus_tag=F7O84_RS07795]	6666666.269962.peg.132	1668	26.5242	5.73074	20.9378	19.0611	22.3815	37.5984	31.2832	27.8833
locus_tag=F7O84_RS12395]	6666666.269962.peg.1320	729	20.9632	9.57311	24.2353	28.5319	33.454	26.3508	7.89049	5.31657
locus_tag=F7O84_RS12390]	6666666.269962.peg.1321	369	5.11284	2.17361	4.82507	10.0657	2.542	3.06229	6.6808	3.50115
locus_tag=F7O84_RS12385]	6666666.269962.peg.1322	357	4.42273	1.01429	4.21999	5.82627	5.78039	1.58261	4.60358	4.52355
locus_tag=F7O84_RS12380]	6666666.269962.peg.1323	1539	220.758	23.4808	246.684	247.906	234.896	178.418	223.989	192.656
locus_tag=F7O84_RS12375]	6666666.269962.peg.1324	1245	58.7769	9.98287	54.2331	46.898	50.4787	53.5494	79.5337	67.9688
locus_tag=F7O84_RS12370]	6666666.269962.peg.1325	2925	9.19681	1.82551	10.1138	11.53	10.6467	5.40847	9.97324	7.50863
locus_tag=F7O84_RS12365]	6666666.269962.peg.1326	711	18.0682	4.49404	12.906	16.9257	14.5119	24.634	14.4469	24.9845
locus_tag=F7O84_RS12360]	6666666.269962.peg.1327	1314	45.9466	7.9723	39.5031	41.1564	35.1214	58.0471	44.0887	57.763
locus_tag=F7O84_RS12355]	6666666.269962.peg.1328	2418	4.26973	1.03987	3.7383	5.5299	6.12919	3.73857	4.07811	2.40433
locus_tag=F7O84_RS12350]	6666666.269962.peg.1329	600	5.53681	1.75332	5.93484	7.18088	8.75466	3.76661	2.73913	4.84472
locus_tag=F7O84_RS07790]	6666666.269962.peg.133	378	14.485	5.7202	8.69574	11.0052	6.94814	23.915	14.1304	22.2156
locus_tag=F7O84_RS12345]	6666666.269962.peg.1330	810	91.8669	8.51686	81.1602	108.768	100.516	90.6777	81.1594	88.9196
locus_tag=F7O84_RS12340]	6666666.269962.peg.1331	582	52.93	10.3999	65.1844	57.4368	67.3683	33.9772	45.8875	47.7258
locus_tag=F7O84_RS12335]	6666666.269962.peg.1332	744	28.8214	5.889	27.6125	37.5419	28.2408	23.5413	18.224	37.768
locus_tag=F7O84_RS12330]	6666666.269962.peg.1333	891	36.3675	4.76566	40.119	46.8554	36.4251	29.8032	32.7404	32.2619
locus_tag=F7O84_RS12325]	6666666.269962.peg.1334	513	43.5496	5.62565	52.594	33.8844	36.9349	42.9526	46.4531	48.4787
locus_tag=F7O84_RS12320]	6666666.269962.peg.1335	1386	21.1981	10.7415	10.3756	9.21862	11.7757	33.019	26.6798	36.1198
locus_tag=F7O84_RS12315]	6666666.269962.peg.1336	888	6.71796	2.09734	3.70156	8.19811	5.07027	5.09002	8.79112	9.45666
locus_tag=F7O84_RS12310]	6666666.269962.peg.1337	864	1.72496	0.818391	1.74368	1.37565	0.868518	3.26963	0.475543	2.61675
locus_tag=F7O84_RS12305]	6666666.269962.peg.1338	1551	3.69835	0.710797	3.0906	3.54422	2.9029	3.64276	3.17887	5.83074
locus_tag=F7O84_RS12300]	6666666.269962.peg.1339	1566	4.31019	0.59619	3.84811	3.70002	3.59387	4.69023	4.46027	5.56864
locus_tag=F7O84_RS07785]	6666666.269962.peg.134	873	28.3566	5.02251	27.7681	33.1857	35.8868	31.0648	19.2963	22.938
locus_tag=F7O84_RS12295]	6666666.269962.peg.1340	978	218.359	17.8573	246.188	224.678	215.606	190.064	237.783	195.836
locus_tag=F7O84_RS12290]	6666666.269962.peg.1341	2736	119.652	25.1005	101.217	93.7793	88.6574	153.225	133.352	147.679
locus_tag=F7O84_RS12285]	6666666.269962.peg.1342	1212	146.014	20.6201	121.929	125.647	129.865	182.27	144.753	171.617
locus_tag=F7O84_RS12280]	6666666.269962.peg.1343	2049	117.546	34.6451	95.0484	79.0343	74.6188	157.448	144.175	154.949
locus_tag=F7O84_RS12275]	6666666.269962.peg.1344	1695	3.76228	0.479836	3.79765	3.41842	4.75917	2.66663	4.12081	3.81099
locus_tag=F7O84_RS12270]	6666666.269962.peg.1345	954	20.5166	1.46311	16.9403	20.2454	21.631	21.9127	22.3954	19.9747
locus_tag=F7O84_RS12265]	6666666.269962.peg.1346	1917	39.0373	4.28075	45.5812	42.8582	39.8295	31.5358	40.7226	33.6965
locus_tag=F7O84_RS12260]	6666666.269962.peg.1347	1209	196.73	25.0205	238.232	230.29	171.773	167.768	179.437	192.881
locus_tag=F7O84_RS12255]	6666666.269962.peg.1348	309	39.635	17.5435	21.7182	24.5212	20.0349	63.9958	53.187	54.3528
locus_tag=F7O84_RS12250]	6666666.269962.peg.1349	2769	126.104	11.3291	131.863	135.21	140.31	111.611	131.021	106.611
locus_tag=F7O84_RS07780]	6666666.269962.peg.135	2925	98.7677	13.224	106.148	122.462	107.365	95.2277	66.4414	94.962
locus_tag=F7O84_RS12245]	6666666.269962.peg.1350	1014	328.127	85.8574	307.277	214.357	205.176	442.41	429.103	370.441
locus_tag=F7O84_RS12240]	6666666.269962.peg.1351	1332	488.405	97.9393	369.025	399.533	404.495	656.188	486.751	614.44
locus_tag=F7O84_RS12235]	6666666.269962.peg.1352	2445	26.6205	3.22311	31.2566	31.0508	25.5504	19.4108	27.2232	25.2309
locus_tag=F7O84_RS12230]	6666666.269962.peg.1353	987	1.03472	0.618824	0.277524	0.602107	0.570212	2.28973	0.832562	1.63618
locus_tag=F7O84_RS12225]	6666666.269962.peg.1354	906	1.2142	0.406358	0.755838	1.80383	1.24238	1.24722	0.453498	1.78246
locus_tag=F7O84_RS12220]	6666666.269962.peg.1355	960	1.01425	0.669276	0.142664	0.464281	0.586249	2.35413	0.855978	1.68219
locus_tag=F7O84_RS12215]	6666666.269962.peg.1356	1548	7.02017	3.59061	3.27354	3.74304	3.27209	8.39458	13.0056	10.4322
locus_tag=F7O84_RS12210]	6666666.269962.peg.1357	2766	3.37446	0.31462	3.66409	3.43763	3.459	3.881	3.1194	2.68567
locus_tag=F7O84_RS12205]	6666666.269962.peg.1358	2340	4.40387	0.559823	3.97997	3.6825	4.16889	4.10464	5.79431	4.69289
locus_tag=F7O84_RS12200]	6666666.269962.peg.1359	1602	1515.37	121.58	1682.91	1554.42	1364.26	1301.74	1614.5	1574.38
locus_tag=F7O84_RS07775]	6666666.269962.peg.136	906	169.598	40.4011	137.109	132.663	117.819	197.061	214.051	218.886
locus_tag=F7O84_RS12195]	6666666.269962.peg.1360	2100	863.194	45.3883	930.27	855.409	819.543	798.522	932.282	843.135
locus_tag=F7O84_RS12190]	6666666.269962.peg.1361	1857	58.5095	2.39855	61.4356	61.2041	58.4924	59.633	51.331	58.9611
locus_tag=F7O84_RS12185]	6666666.269962.peg.1362	930	239.618	14.525	226.938	246.978	265.262	247.26	242.545	208.722
locus_tag=F7O84_RS12180]	6666666.269962.peg.1363	933	58.9567	22.9847	41.836	30.8924	35.1875	105.974	74.4233	65.4271
locus_tag=F7O84_RS12175]	6666666.269962.peg.1364	912	203.69	25.3862	176.453	168.281	229.769	223.643	233.817	190.177
locus_tag=F7O84_RS12170]	6666666.269962.peg.1365	879	221.414	40.8769	192.582	166.486	183.331	315.598	220.626	249.86
locus_tag=F7O84_RS12165]	6666666.269962.peg.1366	963	97.358	27.3459	70.2567	58.9343	80.8452	130.834	132.263	111.014
locus_tag=F7O84_RS12160]	6666666.269962.peg.1367	261	580.412	192.131	346.33	321.617	556.331	891.865	845.352	520.978
locus_tag=F7O84_RS12155]	6666666.269962.peg.1368	948	120.643	16.9484	94.4836	98.263	118.338	157.935	132.189	122.651
locus_tag=F7O84_RS12150]	6666666.269962.peg.1369	867	1060.17	381.294	753.663	628.209	654.76	1397.82	1537.8	1388.78
locus_tag=F7O84_RS07770]	6666666.269962.peg.137	762	149.255	40.6546	194.832	184.835	190.062	100.097	121.859	103.846
locus_tag=F7O84_RS12145]	6666666.269962.peg.1370	1770	27.2607	13.7636	12.4578	11.4995	16.5342	38.6237	42.4797	41.9693
locus_tag=F7O84_RS12140]	6666666.269962.peg.1371	1407	15.4568	7.25228	8.56595	8.44747	7.59999	18.4717	23.9455	25.71
locus_tag=F7O84_RS12135]	6666666.269962.peg.1372	1002	33.0497	3.54076	32.8043	31.8788	38.9429	37.7789	27.8833	29.0103
locus_tag=F7O84_RS12130]	6666666.269962.peg.1373	729	57.6674	8.45474	45.2769	45.6511	75.1429	61.2268	61.9967	56.71
locus_tag=F7O84_RS12125]	6666666.269962.peg.1374	363	345.314	19.4465	346.734	302.051	330.238	367.323	367.858	357.682
locus_tag=F7O84_RS12120]	6666666.269962.peg.1375	525	1644.88	706.315	2067.41	2305.81	2680.36	848.026	1013.48	954.179
locus_tag=F7O84_RS12115]	6666666.269962.peg.1376	879	12.7745	5.00733	7.16731	8.45108	7.68327	24.4251	14.9577	13.9628
locus_tag=F7O84_RS12110]	6666666.269962.peg.1377	786	22.8844	2.49088	24.046	19.6581	19.3328	28.0339	24.0458	22.1896
locus_tag=F7O84_RS12105]	6666666.269962.peg.1378	231	99.9448	22.2329	75.8901	78.4655	83.6484	149.197	117.391	95.0768
locus_tag=F7O84_RS02155]	6666666.269962.peg.1379	123	3.37532	3.37532	7.79435	4.83154	7.62601	0	0	0
locus_tag=F7O84_RS07765]	6666666.269962.peg.138	582	85.1522	14.0728	85.1869	82.1985	85.4192	118.435	45.8875	93.7867
locus_tag=F7O84_RS12100]	6666666.269962.peg.1380	1146	106.032	12.6393	102.061	92.1756	85.9423	111.421	131.579	113.015
locus_tag=F7O84_RS12095]	6666666.269962.peg.1381	1197	351.16	91.1307	388.791	442.359	495.721	261.02	263.272	255.795
locus_tag=F7O84_RS12085]	6666666.269962.peg.1382	705	55.1168	9.24186	68.1875	59.428	65.4604	46.4816	51.2858	39.8573
locus_tag=F7O84_RS12080]	6666666.269962.peg.1383	837	132.6	7.36499	139.249	126.205	123.946	125.554	134.011	146.634
locus_tag=F7O84_RS12075]	6666666.269962.peg.1384	1920	14.7377	3.29473	12.6258	10.3689	11.3342	20.5987	15.8356	17.663
locus_tag=F7O84_RS12070]	6666666.269962.peg.1385	327	9.00954	2.20338	10.052	10.4499	7.4581	12.0946	10.0518	3.95084
locus_tag=F7O84_RS12065]	6666666.269962.peg.1386	306	17.8555	7.23663	9.39907	10.196	12.2614	35.0812	20.1407	20.0544
locus_tag=F7O84_RS12060]	6666666.269962.peg.1387	1278	27.0668	3.96185	19.6113	23.1341	26.5693	31.3884	27.327	34.3705
locus_tag=F7O84_RS12055]	6666666.269962.peg.1388	2289	6.83612	1.11008	5.38498	6.94495	6.22874	8.14536	5.56442	8.74829
locus_tag=F7O84_RS12050]	6666666.269962.peg.1389	714	248.276	44.3926	258.954	209.746	182.082	276.165	219.821	342.885
locus_tag=F7O84_RS07760]	6666666.269962.peg.139	1392	529.094	26.7783	548.127	532.162	587.328	525.621	482.004	499.322
locus_tag=F7O84_RS12045]	6666666.269962.peg.1390	1071	103.554	12.1471	101.28	119.577	99.3176	123.971	78.2608	98.9149
locus_tag=F7O84_RS12040]	6666666.269962.peg.1391	798	185.429	23.7123	197.714	215.78	213.93	147.974	170.423	166.752
locus_tag=F7O84_RS12035]	6666666.269962.peg.1392	1083	63.4264	5.56372	76.3828	65.5738	53.6989	58.4294	61.4597	65.0138
locus_tag=F7O84_RS12030]	6666666.269962.peg.1393	996	9.61223	2.76826	9.21303	11.4858	15.445	10.2107	2.88764	8.43124
locus_tag=F7O84_RS12025]	6666666.269962.peg.1394	1092	376.006	13.1737	407.111	368.704	348.056	384.422	372.115	375.628
locus_tag=F7O84_RS12020]	6666666.269962.peg.1395	420	227.036	41.8343	268.698	251.154	286.76	188.331	203.478	163.798
locus_tag=F7O84_RS12015]	6666666.269962.peg.1396	948	324.676	47.6355	300.065	257.176	273.88	405.268	364.495	347.171
locus_tag=F7O84_RS12010]	6666666.269962.peg.1397	489	56.4893	19.7251	45.0925	68.3604	81.7153	78.5674	17.6447	47.5555
locus_tag=F7O84_RS12005]	6666666.269962.peg.1398	1053	98.8065	25.5896	75.0472	90.2989	82.4869	150.772	70.6243	123.61
locus_tag=F7O84_RS12000]	6666666.269962.peg.1399	2190	29.548	4.53359	29.7055	37.3799	34.2648	30.4425	18.9488	26.5464
locus_tag=F7O84_RS14745]	6666666.269962.peg.14	591	11.8915	1.67071	11.1235	12.5694	14.6017	13.3839	7.64731	12.023
locus_tag=F7O84_RS07755]	6666666.269962.peg.140	2628	1130.34	302.465	914.929	812.668	756.039	1263.71	1568.28	1466.44
locus_tag=F7O84_RS11995]	6666666.269962.peg.1400	1569	97.1062	28.0838	113.739	126.602	135.23	67.6982	62.5862	76.7827
locus_tag=F7O84_RS11990]	6666666.269962.peg.1401	921	107.857	22.6117	142.609	135.342	113.456	80.976	82.5307	92.2303
locus_tag=F7O84_RS11985]	6666666.269962.peg.1402	840	264.913	55.4628	317.775	323.316	320.036	197.747	224.511	206.093
locus_tag=F7O84_RS11980]	6666666.269962.peg.1403	1896	14.4006	8.39116	15.2416	23.3512	29.7825	6.55581	5.85099	5.62151
locus_tag=F7O84_RS11975]	6666666.269962.peg.1404	999	77.3135	7.91591	79.1038	84.7696	89.9503	79.178	61.6921	69.1872
locus_tag=F7O84_RS11970]	6666666.269962.peg.1405	768	110.475	18.0373	128.398	123.034	134.105	104.465	72.7581	100.091
locus_tag=F7O84_RS11965]	6666666.269962.peg.1406	1038	16.1027	10.6921	19.7916	27.338	33.2547	8.70893	3.16662	4.3562
locus_tag=F7O84_RS11960]	6666666.269962.peg.1407	765	23.6778	4.95066	24.5271	25.8298	31.8797	27.3264	11.8158	20.6877
locus_tag=F7O84_RS11955]	6666666.269962.peg.1408	918	66.9916	13.7873	60.5718	41.7549	58.0374	107.09	66.2404	68.2553
locus_tag=F7O84_RS11950]	6666666.269962.peg.1409	2067	173.827	19.0414	160.281	176.314	203.301	198.991	141.727	162.35
locus_tag=F7O84_RS07750]	6666666.269962.peg.141	336	146.874	26.9274	119.838	123.366	125.625	137.885	200.543	173.987
locus_tag=F7O84_RS11945]	6666666.269962.peg.1410	1212	378.327	20.0248	347.706	378.289	436.804	379.924	356.29	370.949
locus_tag=F7O84_RS11940]	6666666.269962.peg.1411	783	57.9788	12.6458	58.4214	73.4311	77.3879	60.6122	33.0584	44.9616
locus_tag=F7O84_RS11935]	6666666.269962.peg.1412	732	74.9951	11.1531	71.2855	61.2952	58.9453	98.7964	78.0203	81.6278
locus_tag=F7O84_RS11930]	6666666.269962.peg.1413	786	92.5058	17.8628	92.6992	106.418	131.988	84.1018	71.6146	68.2123
locus_tag=F7O84_RS11925]	6666666.269962.peg.1414	696	177.796	12.7305	176.51	157.749	165.767	205.378	172.967	188.406
locus_tag=F7O84_RS11920]	6666666.269962.peg.1415	1065	216.52	10.8549	243.309	209.393	205.039	215.387	203.699	222.296
locus_tag=F7O84_RS11915]	6666666.269962.peg.1416	1221	107.649	21.5144	85.136	108.416	112.007	142.983	65.6179	131.732
locus_tag=F7O84_RS11910]	6666666.269962.peg.1417	2286	22.012	7.3556	24.9232	28.4662	34.7134	21.9966	8.26771	13.7048
locus_tag=F7O84_RS11905]	6666666.269962.peg.1418	1161	39.5327	6.67421	35.3896	38.7741	47.9907	51.0975	29.727	34.2177
locus_tag=F7O84_RS11900]	6666666.269962.peg.1419	1008	69.7777	17.7815	45.7885	57.9246	74.0722	118.828	53.8043	68.249
locus_tag=F7O84_RS07745]	6666666.269962.peg.142	273	14.8704	2.91789	14.5486	14.1495	11.682	10.3478	19.5652	18.9293
locus_tag=F7O84_RS11895]	6666666.269962.peg.1420	1131	145.651	27.1003	151.489	186.796	179.97	128.385	95.9058	131.363
locus_tag=F7O84_RS11890]	6666666.269962.peg.1421	570	132.881	12.6165	136.237	109.473	120.13	154.629	131.19	145.625
locus_tag=F7O84_RS11885]	6666666.269962.peg.1422	1086	19.895	13.0432	24.2135	32.9699	41.6313	7.2835	6.43166	6.8403
locus_tag=F7O84_RS11880]	6666666.269962.peg.1423	888	18.1695	13.363	20.5128	31.6213	42.4635	3.18126	8.32843	2.90974
locus_tag=F7O84_RS11875]	6666666.269962.peg.1424	810	162.196	26.2105	191.403	181.585	192.232	160.43	115.145	132.382
locus_tag=F7O84_RS11870]	6666666.269962.peg.1425	1056	60.5116	19.2961	66.1444	78.0836	88.2927	67.4138	20.6213	42.5136
locus_tag=F7O84_RS11865]	6666666.269962.peg.1426	1524	15.8426	9.28437	19.8607	23.8843	31.6359	9.63897	4.31359	5.72211
locus_tag=F7O84_RS11860]	6666666.269962.peg.1427	669	10.1375	2.99221	5.11801	6.66233	12.058	16.8906	10.4406	9.65565
locus_tag=F7O84_RS11855]	6666666.269962.peg.1428	1419	51.9508	6.48049	43.7223	47.534	56.4518	66.8912	47.486	49.6194
locus_tag=F7O84_RS11850]	6666666.269962.peg.1429	1290	131.793	28.5955	98.1001	116.898	140.045	187.893	94.5955	153.228
locus_tag=F7O84_RS07740]	6666666.269962.peg.143	222	12.358	4.23501	11.7216	4.68464	10.1405	10.18	18.5076	18.9133
locus_tag=F7O84_RS11845]	6666666.269962.peg.1430	951	291.159	42.7561	332.674	331.353	337.719	257.247	220.34	267.623
locus_tag=F7O84_RS11840]	6666666.269962.peg.1431	1068	790.334	42.0299	758.141	834.106	869.142	772.367	714.405	793.845
locus_tag=F7O84_RS11835]	6666666.269962.peg.1432	1104	54.3579	8.14727	49.6224	45.3515	45.5405	71.1358	52.4752	62.0218
locus_tag=F7O84_RS11830]	6666666.269962.peg.1433	1725	281.383	9.91335	290.033	277.761	289.937	271.524	293.92	265.126
locus_tag=F7O84_RS11825]	6666666.269962.peg.1434	747	347.193	35.6835	394.189	400.761	345.565	279.849	309.115	353.68
locus_tag=F7O84_RS11820]	6666666.269962.peg.1435	1434	235.427	63.1201	265.225	313.302	317.114	167.055	169.906	179.96
locus_tag=F7O84_RS11815]	6666666.269962.peg.1436	3303	1779.91	129.308	1578.02	1646.14	1832.21	1913.75	1981.7	1727.65
locus_tag=F7O84_RS11810]	6666666.269962.peg.1437	2421	169.137	20.6024	144.878	143.967	156.759	199.066	188.718	181.435
locus_tag=F7O84_RS11805]	6666666.269962.peg.1438	1077	669.055	151.424	547.196	559.379	522.911	900.21	592.461	892.172
locus_tag=F7O84_RS11800]	6666666.269962.peg.1439	870	479.457	14.1885	481.556	495.745	480.428	471.476	444.872	502.663
locus_tag=F7O84_RS07735]	6666666.269962.peg.144	582	96.0983	13.9527	109.19	114.363	92.1882	69.8959	106.6	84.3525
locus_tag=F7O84_RS11795]	6666666.269962.peg.1440	552	621.679	111.383	550.313	499.001	481.574	738.993	726.465	733.729
locus_tag=F7O84_RS11790]	6666666.269962.peg.1441	816	327.38	25.0694	337.863	367.965	351.52	285.265	315.705	305.961
locus_tag=F7O84_RS11785]	6666666.269962.peg.1442	1272	72.5622	11.7489	54.4817	64.4737	65.6304	91.5003	70.4163	88.8707
locus_tag=F7O84_RS11780]	6666666.269962.peg.1443	894	54.8107	9.79167	45.8058	42.8759	46.3754	77.7338	57.9078	58.1655
locus_tag=F7O84_RS11775]	6666666.269962.peg.1444	2925	86.4691	8.80962	86.7634	79.0341	80.6198	110.294	73.3244	88.7785
locus_tag=F7O84_RS11770]	6666666.269962.peg.1445	396	21.272	7.16265	23.8639	28.1382	30.3192	24.2547	3.11265	17.9434
locus_tag=F7O84_RS11765]	6666666.269962.peg.1446	936	257.376	56.154	290.743	313.33	336.517	188.934	206.313	208.42
locus_tag=F7O84_RS11760]	6666666.269962.peg.1447	813	127.934	16.6871	123.313	124.813	113.991	171.652	99.5587	134.278
locus_tag=F7O84_RS11755]	6666666.269962.peg.1448	873	56.6104	9.71753	57.5756	60.2448	74.997	62.7769	31.5329	52.5353
locus_tag=F7O84_RS11750]	6666666.269962.peg.1449	1470	51.3098	12.2414	47.8887	63.6728	61.2571	65.7235	28.2298	41.0867
locus_tag=F7O84_RS07730]	6666666.269962.peg.145	537	14.4312	1.41428	12.7521	13.28	17.4674	13.6776	13.7722	15.6378
locus_tag=F7O84_RS11745]	6666666.269962.peg.1450	405	142.016	4.91213	143.383	132.062	141.279	150.664	137.971	146.737
locus_tag=F7O84_RS11740]	6666666.269962.peg.1451	648	181.594	25.8831	218.329	198.552	205.549	157.814	145.833	163.484
locus_tag=F7O84_RS11735]	6666666.269962.peg.1452	1611	168.504	30.8866	151.24	135.382	126.231	212.179	176.488	209.507
locus_tag=F7O84_RS11730]	6666666.269962.peg.1453	699	87.8884	14.9772	77.0021	76.0916	73.0002	104.269	80.528	116.44
locus_tag=F7O84_RS11725]	6666666.269962.peg.1454	675	48.6416	9.22953	37.3337	51.7243	52.25	66.125	32.2608	52.1555
locus_tag=F7O84_RS11720]	6666666.269962.peg.1455	726	119.667	12.4158	135.826	109.893	102.069	135.411	109.792	125.011
locus_tag=F7O84_RS11715]	6666666.269962.peg.1456	1614	43.8636	4.76694	45.1435	46.6697	48.934	49.008	30.8025	42.6239
locus_tag=F7O84_RS11710]	6666666.269962.peg.1457	2022	121.38	11.9593	126.256	131.229	131.747	132.167	93.4717	113.411
locus_tag=F7O84_RS11705]	6666666.269962.peg.1458	1632	250.995	11.5131	239.76	252.35	245.305	277.303	233.38	257.871
locus_tag=F7O84_RS11700]	6666666.269962.peg.1459	969	89.2667	21.8695	113.213	107.326	112.87	57.7236	80.1386	64.3296
locus_tag=F7O84_RS07725]	6666666.269962.peg.146	450	1.20298	0.659392	1.52175	1.98093	2.08444	0	0.913043	0.717736
locus_tag=F7O84_RS11695]	6666666.269962.peg.1460	1434	223.788	45.2041	280.792	266.369	259.814	190.301	155.58	189.87
locus_tag=F7O84_RS11690]	6666666.269962.peg.1461	1116	460.244	47.1563	485.243	449.704	429.496	539.172	360.063	497.785
locus_tag=F7O84_RS11685]	6666666.269962.peg.1462	918	23.7262	3.36439	19.9917	21.0393	24.9316	27.6957	28.6445	20.0544
locus_tag=F7O84_RS11680]	6666666.269962.peg.1463	1482	628.919	133.878	756.318	699.141	832.933	463.202	580.817	441.103
locus_tag=F7O84_RS10560]	6666666.269962.peg.1464	1713	31.2954	8.31496	24.7851	21.596	22.5602	37.93	41.4947	39.4064
locus_tag=F7O84_RS10555]	6666666.269962.peg.1465	1326	0.732403	0.352926	0.206573	0.672262	0.565912	0.426087	1.54928	0.974303
locus_tag=F7O84_RS10550]	6666666.269962.peg.1466	912	1.34622	0.562225	1.80208	0.651622	1.43991	2.47803	1.35154	0.354146
locus_tag=F7O84_RS10545]	6666666.269962.peg.1467	894	1.52469	1.15764	0.153197	0.830928	2.09843	4.42387	0.919171	0.722553
locus_tag=F7O84_RS10540]	6666666.269962.peg.1468	1608	1.97054	0.620153	1.19242	1.10873	1.75	2.45954	2.29964	3.01289
locus_tag=F7O84_RS10535]	6666666.269962.peg.1469	1017	32.4495	2.98532	31.1084	24.8347	33.5724	36.1106	36.3601	32.711
locus_tag=F7O84_RS07715]	6666666.269962.peg.147	750	3.99768	1.18293	2.73916	4.35805	6.25333	2.25997	4.93043	3.44513
locus_tag=F7O84_RS10530]	6666666.269962.peg.1470	2046	124.792	11.1963	115.537	112.553	116.814	120.675	145.993	137.18
locus_tag=F7O84_RS10525]	6666666.269962.peg.1471	1695	19.5686	2.92718	14.4634	16.1279	21.4716	19.3331	21.8161	24.1998
locus_tag=F7O84_RS10520]	6666666.269962.peg.1472	348	184.848	32.9445	149.158	151.558	215.632	198.072	239.674	154.994
locus_tag=F7O84_RS10515]	6666666.269962.peg.1473	834	294.442	82.8569	240.087	191.324	203.346	361.08	409.884	360.934
locus_tag=F7O84_RS10510]	6666666.269962.peg.1474	270	1.20618	0.673579	0.507251	1.10052	1.38963	0	3.04348	1.19623
locus_tag=F7O84_RS10505]	6666666.269962.peg.1475	1359	0.149447	0.103433	0.302335	0.218646	0.138043	0	0	0.237661
locus_tag=F7O84_RS10495]	6666666.269962.peg.1476	486	0.732613	0.732613	0	0.917098	2.31605	1.16253	0	0
locus_tag=F7O84_RS10490]	6666666.269962.peg.1477	798	0.313206	0.251147	0	0.186178	0.470175	0.70801	0.514874	0
locus_tag=F7O84_RS10485]	6666666.269962.peg.1478	474	0.754982	0.327058	0.288941	0.313439	1.18734	1.19197	0.866813	0.681395
locus_tag=F7O84_RS10480]	6666666.269962.peg.1479	1833	0.625359	0.230803	0.523025	0.648423	1.02346	0.308233	0.896605	0.352407
locus_tag=F7O84_RS07710]	6666666.269962.peg.148	549	23.3676	2.96094	27.192	27.8738	23.9198	20.5826	19.4583	21.1791
locus_tag=F7O84_RS10475]	6666666.269962.peg.1480	213	0	0	0	0	0	0	0	0
locus_tag=F7O84_RS10470]	6666666.269962.peg.1481	867	0.533595	0.328791	0.63187	0.342722	0.432756	0	1.42169	0.372528
locus_tag=F7O84_RS10465]	6666666.269962.peg.1482	462	0.517966	0.41915	0.296446	0	0	1.22293	0.889327	0.699094
locus_tag=F7O84_RS10460]	6666666.269962.peg.1483	294	0.190572	0.254097	0	0.50534	0.638095	0	0	0
locus_tag=F7O84_RS10455]	6666666.269962.peg.1484	159	2.72865	2.33815	0	1.8688	4.71949	0	7.75225	2.03133
locus_tag=F7O84_RS10450]	6666666.269962.peg.1485	2364	1.0558	0.682596	0.231739	1.50832	2.14264	0.477996	1.56422	0.409875
locus_tag=F7O84_RS10445]	6666666.269962.peg.1486	2004	0.458609	0.43569	0.205027	0	1.40419	0	0.820098	0.322337
locus_tag=F7O84_RS10440]	6666666.269962.peg.1487	270	0.199371	0.332285	0	0	0	0	0	1.19623
locus_tag=F7O84_RS10435]	6666666.269962.peg.1488	678	2.70146	0.385611	1.81802	2.62956	2.76696	2.49996	3.63601	2.85824
locus_tag=F7O84_RS10425]	6666666.269962.peg.1489	471	6.47771	2.05358	3.48937	3.78522	6.77112	5.99779	7.85101	10.9718
locus_tag=F7O84_RS11625]	6666666.269962.peg.149	1380	25.8212	4.87833	26.7961	29.8216	35.4808	24.1554	16.673	22.0002
locus_tag=F7O84_RS10420]	6666666.269962.peg.1490	588	7.47253	2.8064	3.49382	3.03204	8.29523	8.64783	12.5776	8.78861
locus_tag=F7O84_RS10415]	6666666.269962.peg.1491	183	14.1752	6.91832	5.23883	12.1779	26.6535	6.17477	22.4519	12.3545
locus_tag=F7O84_RS10405]	6666666.269962.peg.1492	621	107.906	19.7419	81.8219	115.315	124.764	122.824	74.7637	127.944
locus_tag=F7O84_RS10400]	6666666.269962.peg.1493	1143	39.2111	7.53009	34.3892	43.6741	36.9291	49.9249	23.7247	46.6246
locus_tag=F7O84_RS10390]	6666666.269962.peg.1494	1401	31.4651	10.3119	17.9873	25.7691	46.0631	27.4229	47.8028	23.7452
locus_tag=F7O84_RS10385]	6666666.269962.peg.1495	573	44.5506	7.84296	44.4575	51.079	61.5511	29.5807	42.3059	38.3294
locus_tag=F7O84_RS10380]	6666666.269962.peg.1496	726	24.5811	3.85056	21.8831	24.3524	28.6826	24.125	16.4121	32.0312
locus_tag=F7O84_RS10430]	6666666.269962.peg.1497	462	0.116516	0.194193	0	0	0	0	0	0.699094
locus_tag=F7O84_RS10370]	6666666.269962.peg.1498	156	1.49755	1.49755	1.75587	0	3.60769	3.62174	0	0
locus_tag=F7O84_RS10360]	6666666.269962.peg.1499	264	12.5081	5.49969	6.74414	8.44147	13.5015	8.56048	28.0138	9.78731
locus_tag=F7O84_RS14740]	6666666.269962.peg.15	441	68.9973	21.6708	45.9632	61.6515	44.6666	116.586	58.6956	86.4213
locus_tag=F7O84_RS11620]	6666666.269962.peg.150	822	14.6055	4.39534	14.8288	8.67562	10.2701	11.6847	24.4922	17.6815
locus_tag=F7O84_RS10355]	6666666.269962.peg.1500	1674	55.2366	7.07876	45.4072	53.3396	70.6021	56.7017	59.6423	45.7268
locus_tag=F7O84_RS10350]	6666666.269962.peg.1501	639	8.35527	6.43584	1.50032	2.79005	1.46792	24.7571	9.00183	10.6144
locus_tag=F7O84_RS10345]	6666666.269962.peg.1502	201	10.8763	8.41201	5.45106	5.17408	5.6	30.92	2.04413	16.0687
locus_tag=F7O84_RS10340]	6666666.269962.peg.1503	342	31.7929	10.5034	27.2314	45.1792	49.9169	28.0844	12.0137	28.3317
locus_tag=F7O84_RS10330]	6666666.269962.peg.1504	300	121.135	25.3275	160.697	143.618	135.072	71.5656	108.196	107.66
locus_tag=F7O84_RS10325]	6666666.269962.peg.1505	261	0.884994	0.884994	0	1.7077	1.43755	2.16472	0	0
locus_tag=F7O84_RS10320]	6666666.269962.peg.1506	1668	6.06791	1.02112	5.33709	6.50216	5.06115	4.74214	8.37503	6.38992
locus_tag=F7O84_RS10315]	6666666.269962.peg.1507	1302	192.975	41.87	209.118	250.469	244.946	157.955	134.116	161.243
locus_tag=F7O84_RS10310]	6666666.269962.peg.1508	1287	0.560436	0.300962	0.106416	1.38527	0.29153	0.438999	0.638492	0.501914
locus_tag=F7O84_RS10305]	6666666.269962.peg.1509	873	13.6468	2.82039	13.1781	16.678	17.1913	15.5324	8.94217	10.3591
locus_tag=F7O84_RS11615]	6666666.269962.peg.151	1164	287.811	72.8868	239.794	200.135	204.845	387.825	364.629	329.641
locus_tag=F7O84_RS10300]	6666666.269962.peg.1510	471	15.6797	2.24115	13.0851	16.7181	11.5507	19.1929	15.702	17.8291
locus_tag=F7O84_RS10295]	6666666.269962.peg.1511	894	18.4618	2.09481	16.3921	19.4437	20.7745	18.9595	14.2471	20.954
locus_tag=F7O84_RS10290]	6666666.269962.peg.1512	942	66.322	10.6973	49.7236	56.4629	73.4866	70.7739	86.7972	60.6876
locus_tag=F7O84_RS10285]	6666666.269962.peg.1513	831	78.5301	13.1372	79.1092	94.7558	101.137	73.4285	68.7254	54.0246
locus_tag=F7O84_RS10280]	6666666.269962.peg.1514	438	80.7801	17.1238	95.3702	104.474	90.8017	83.8458	39.3984	70.7904
locus_tag=F7O84_RS10275]	6666666.269962.peg.1515	774	132.038	41.9727	149.698	176.979	195.356	94.8953	74.3174	100.984
locus_tag=F7O84_RS10270]	6666666.269962.peg.1516	2433	9.01827	0.8279	10.414	8.97648	9.32987	8.82437	9.79466	6.77026
locus_tag=F7O84_RS10265]	6666666.269962.peg.1517	1368	15.8974	6.71835	7.809	9.99154	9.73654	23.1283	22.5257	22.1932
locus_tag=F7O84_RS10260]	6666666.269962.peg.1518	2100	1.53589	0.39767	0.782616	1.20271	1.42933	2.15235	1.95652	1.69181
locus_tag=F7O84_RS10255]	6666666.269962.peg.1519	444	1.98784	0.998273	1.54232	1.00385	0.422522	2.54501	2.77614	3.63718
locus_tag=F7O84_RS06990]	6666666.269962.peg.152	159	37.9446	9.39064	31.0093	48.5889	40.1157	53.3011	18.0886	36.5639
locus_tag=F7O84_RS10250]	6666666.269962.peg.1520	930	3.12129	1.8034	0.883599	1.59753	1.81548	5.46766	6.18513	2.77833
locus_tag=F7O84_RS10245]	6666666.269962.peg.1521	1263	10.6957	5.54982	5.85568	4.23477	5.34726	19.683	12.6872	16.3664
locus_tag=F7O84_RS10240]	6666666.269962.peg.1522	264	8.95619	4.88667	7.26292	2.81382	2.13182	12.8407	14.0069	14.681
locus_tag=F7O84_RS10235]	6666666.269962.peg.1523	1323	2.3811	0.726877	1.55281	2.13366	1.27619	3.84348	2.79503	2.68541
locus_tag=F7O84_RS10230]	6666666.269962.peg.1524	612	16.7274	1.95529	14.9938	15.0512	17.166	15.6942	22.1547	15.3047
locus_tag=F7O84_RS10225]	6666666.269962.peg.1525	468	11.8695	0.915191	13.169	11.4285	10.0214	12.0725	11.413	13.1125
locus_tag=F7O84_RS10220]	6666666.269962.peg.1526	1377	35.7872	1.53743	37.099	33.2313	35.4219	34.4657	39.0878	35.4177
locus_tag=F7O84_RS10215]	6666666.269962.peg.1527	909	105.075	10.7926	89.1959	102.479	94.935	101.313	113.904	128.624
locus_tag=F7O84_RS10210]	6666666.269962.peg.1528	1725	2.93406	2.09325	1.11154	0.775147	0.761275	5.2405	6.90737	2.80853
locus_tag=F7O84_RS10205]	6666666.269962.peg.1529	1602	7.08031	4.18689	3.24869	2.50399	2.92759	10.9331	10.7719	12.0967
locus_tag=F7O84_RS11610]	6666666.269962.peg.153	465	309.926	127.112	369.934	433.249	507.932	142.159	227.083	179.203
locus_tag=F7O84_RS10200]	6666666.269962.peg.1530	1371	37.7084	6.56306	30.4684	30.3425	34.8927	35.4408	53.6438	41.4622
locus_tag=F7O84_RS10195]	6666666.269962.peg.1531	879	9.42664	0.848784	9.03704	8.45108	8.32354	9.6415	9.34856	11.7581
locus_tag=F7O84_RS10190]	6666666.269962.peg.1532	828	6.05422	2.37711	3.30816	2.51205	5.21111	9.553	7.9395	7.80148
locus_tag=F7O84_RS10185]	6666666.269962.peg.1533	1854	8.536	2.3464	5.31875	8.49429	4.75577	10.9707	9.30772	12.3688
locus_tag=F7O84_RS10180]	6666666.269962.peg.1534	165	3.51305	1.27551	2.49014	0.900424	3.41091	3.42419	4.98023	5.87239
locus_tag=F7O84_RS10175]	6666666.269962.peg.1535	1191	2646.55	1004.43	1904.07	1597.1	1425.19	3368.13	3872.04	3712.79
locus_tag=F7O84_RS10170]	6666666.269962.peg.1536	888	202.515	49.1284	183.536	252.636	299.779	152.701	167.494	158.945
locus_tag=F7O84_RS10165]	6666666.269962.peg.1537	972	148.632	6.87684	140.199	148.111	152.666	163.336	136.956	150.525
locus_tag=F7O84_RS10160]	6666666.269962.peg.1538	759	505.037	16.9072	542.238	496.016	465.91	502.463	506.143	517.451
locus_tag=F7O84_RS10155]	6666666.269962.peg.1539	711	605.385	67.5417	626.038	563.981	521.111	528.438	749.504	643.237
locus_tag=F7O84_RS11610]	6666666.269962.peg.154	390	194.703	48.8987	218.43	228.569	283.805	143.421	166.455	127.536
locus_tag=F7O84_RS10150]	6666666.269962.peg.1540	627	733.708	108.857	622.754	618.686	633.112	869.565	878.749	779.379
locus_tag=F7O84_RS10145]	6666666.269962.peg.1541	315	99.5201	13.7025	99.1314	107.536	124.471	73.5386	84.7826	107.66
locus_tag=F7O84_RS10140]	6666666.269962.peg.1542	1089	123.303	18.4919	94.1978	116.646	115.592	162.39	111.301	139.692
locus_tag=F7O84_RS11980]	6666666.269962.peg.1543	120	0.448585	0.747642	0	0	0	0	0	2.69151
locus_tag=F7O84_RS10135]	6666666.269962.peg.1544	1518	95.4256	11.9713	82.9146	81.0381	87.3736	113.147	94.462	113.618
locus_tag=F7O84_RS10130]	6666666.269962.peg.1545	1530	37.4267	4.5439	32.0464	37.191	37.0295	45.4209	29.8082	43.0642
locus_tag=F7O84_RS10125]	6666666.269962.peg.1546	2814	7.45104	2.85294	4.33165	4.32933	5.13333	10.0389	12.2648	8.60824
locus_tag=F7O84_RS10120]	6666666.269962.peg.1547	777	16.9124	5.3947	10.5759	11.6638	12.3135	24.7229	24.3243	17.8741
locus_tag=F7O84_RS10115]	6666666.269962.peg.1548	273	22.729	8.8281	19.5654	12.5169	9.6205	28.9739	36.1204	29.577
locus_tag=F7O84_RS10110]	6666666.269962.peg.1549	798	47.7882	14.9846	33.8104	27.9267	36.6737	89.9173	49.4279	48.9734
locus_tag=F7O84_RS08680]	6666666.269962.peg.155	171	28.7817	23.3888	40.8471	39.9662	75.6982	3.30405	7.20823	5.66634
locus_tag=F7O84_RS10105]	6666666.269962.peg.1550	978	193.931	79.0892	125.055	106.49	112.982	312.536	276.013	230.512
locus_tag=F7O84_RS10100]	6666666.269962.peg.1551	1512	68.5214	13.1004	49.2759	60.0372	56.95	69.1293	97.5543	78.182
locus_tag=F7O84_RS10095]	6666666.269962.peg.1552	747	16.7573	3.94304	17.7844	11.1378	10.5478	21.9341	19.2509	19.8891
locus_tag=F7O84_RS10090]	6666666.269962.peg.1553	678	79.0085	25.447	59.1868	53.9059	47.5917	100.832	120.594	91.9401
locus_tag=F7O84_RS10085]	6666666.269962.peg.1554	468	65.2721	17.7666	48.5791	57.4597	36.4777	85.7146	70.2341	93.1677
locus_tag=F7O84_RS10990]	6666666.269962.peg.1555	132	130.168	66.3534	70.5541	75.4105	45.4787	192.611	208.547	188.406
locus_tag=F7O84_RS10080]	6666666.269962.peg.1556	1770	4.8908	1.15913	3.09509	5.28808	3.92158	7.0225	4.17833	5.83921
locus_tag=F7O84_RS10075]	6666666.269962.peg.1557	1590	7.37539	0.904892	6.54641	6.91457	6.60729	9.94954	6.71862	7.51592
locus_tag=F7O84_RS10070]	6666666.269962.peg.1558	1716	21.2128	4.31006	17.5587	16.9695	16.1799	24.0352	28.2533	24.2801
locus_tag=F7O84_RS10065]	6666666.269962.peg.1559	978	5.07218	1.39749	3.64101	4.70927	3.45276	6.35471	7.98212	4.29321
locus_tag=F7O84_RS11605]	6666666.269962.peg.156	747	662.935	55.8976	580.1	664.885	685.857	727.607	578.077	741.084
locus_tag=F7O84_RS10060]	6666666.269962.peg.1560	909	5.34316	0.941944	5.87608	4.24952	7.63608	4.35087	4.97202	4.97441
locus_tag=F7O84_RS10055]	6666666.269962.peg.1561	1137	9.13456	1.42234	10.6001	6.66409	10.2297	7.95063	10.8409	8.52194
locus_tag=F7O84_RS10050]	6666666.269962.peg.1562	1551	12.2763	1.05041	12.3624	10.6327	12.2164	13.8425	13.7751	10.8285
locus_tag=F7O84_RS10045]	6666666.269962.peg.1563	1533	23.7027	5.67771	20.0121	19.8675	14.1954	29.8528	29.2138	29.0746
locus_tag=F7O84_RS10040]	6666666.269962.peg.1564	2706	62.8357	7.74023	60.887	51.2253	53.1741	69.9454	74.7035	67.0789
locus_tag=F7O84_RS10035]	6666666.269962.peg.1565	1239	70.5752	12.7174	82.02	83.2183	84.6395	51.9847	62.675	58.9135
locus_tag=F7O84_RS10030]	6666666.269962.peg.1566	699	100.541	10.5287	107.568	85.0185	89.64	95.3777	115.208	110.433
locus_tag=F7O84_RS10025]	6666666.269962.peg.1567	1005	138.793	8.89656	156.445	147.831	132.16	126.491	131.642	138.191
locus_tag=F7O84_RS10020]	6666666.269962.peg.1568	597	480.847	40.8037	456.067	435.755	428.306	504.423	498.962	561.566
locus_tag=F7O84_RS10015]	6666666.269962.peg.1569	663	367.71	25.8297	405.503	379.828	395.29	361.322	320.391	343.929
locus_tag=F7O84_RS11600]	6666666.269962.peg.157	552	118.056	27.413	138.447	136.189	161.771	80.8593	102.717	88.3518
locus_tag=F7O84_RS10010]	6666666.269962.peg.1570	732	457.3	77.2989	541.657	509.846	552.292	339.613	424.902	375.488
locus_tag=F7O84_RS10005]	6666666.269962.peg.1571	894	440.79	15.3079	427.112	438.564	453.052	445.547	469.696	410.772
locus_tag=F7O84_RS10000]	6666666.269962.peg.1572	732	274.369	120.318	408.067	406.944	369.049	151.282	159.97	150.901
locus_tag=F7O84_RS09995]	6666666.269962.peg.1573	540	5.20993	1.46682	4.05801	4.6772	7.64296	3.13884	4.56521	7.17736
locus_tag=F7O84_RS09990]	6666666.269962.peg.1574	2712	27.2729	3.64325	22.8768	22.6251	25.3869	30.2079	33.4816	29.0588
locus_tag=F7O84_RS09985]	6666666.269962.peg.1575	633	60.1525	8.80007	62.0962	68.0652	72.017	60.6942	33.7523	64.2901
locus_tag=F7O84_RS09980]	6666666.269962.peg.1576	795	18.1665	7.81128	14.2987	8.03586	8.73106	27.7166	25.8408	24.376
locus_tag=F7O84_RS09975]	6666666.269962.peg.1577	279	56.8801	10.3117	52.0342	62.3035	68.5849	50.6265	70.6872	37.0445
locus_tag=F7O84_RS09970]	6666666.269962.peg.1578	1665	48.4369	4.5094	44.0897	46.7571	46.3084	49.2035	61.1986	43.0642
locus_tag=F7O84_RS09965]	6666666.269962.peg.1579	639	50.4707	9.46407	41.366	36.7356	44.9183	57.4718	66.2278	56.1047
locus_tag=F7O84_RS11595]	6666666.269962.peg.158	528	46.9589	6.63732	48.7653	38.8308	35.175	58.8533	50.5805	49.5483
locus_tag=F7O84_RS09960]	6666666.269962.peg.1580	393	49.5102	21.7374	31.7129	32.5115	19.0941	84.8207	64.8191	64.1032
locus_tag=F7O84_RS09955]	6666666.269962.peg.1581	1821	57.5721	5.6602	50.9173	54.6633	61.5031	55.2271	70.6217	52.5
locus_tag=F7O84_RS09950]	6666666.269962.peg.1582	309	24.7736	7.25902	22.6047	18.7515	13.3566	34.7406	22.6045	36.5836
locus_tag=F7O84_RS09945]	6666666.269962.peg.1583	996	33.3906	7.94444	29.8392	20.8833	25.616	47.0827	41.2519	35.6706
locus_tag=F7O84_RS09940]	6666666.269962.peg.1584	600	38.3729	10.6296	50.6744	52.2471	44.086	34.8412	19.8587	28.53
locus_tag=F7O84_RS09935]	6666666.269962.peg.1585	996	1.18026	0.436866	1.10006	1.49167	1.13012	0	2.0626	1.29711
locus_tag=F7O84_RS09930]	6666666.269962.peg.1586	1296	8.24369	1.68828	9.93367	10.8905	7.81666	7.41116	4.4384	8.9717
locus_tag=F7O84_RS09925]	6666666.269962.peg.1587	1395	11.777	2.79392	12.4686	14.5907	14.2549	14.1754	7.06872	8.10347
locus_tag=F7O84_RS09920]	6666666.269962.peg.1588	873	39.3465	6.35861	46.5939	45.6091	44.9122	36.8895	27.2972	34.7769
locus_tag=F7O84_RS09915]	6666666.269962.peg.1589	504	4490.38	756.736	3794.06	3858.1	3548.76	4573.74	5118.75	6048.85
locus_tag=F7O84_RS03215]	6666666.269962.peg.159	1437	133.237	62.9923	73.7685	67.513	69.4524	208.383	191.282	189.024
locus_tag=F7O84_RS09910]	6666666.269962.peg.1590	477	0.310263	0.413684	0	0	0	1.18447	0	0.67711
locus_tag=F7O84_RS12205]	6666666.269962.peg.1591	210	0	0	0	0	0	0	0	0
locus_tag=F7O84_RS09900]	6666666.269962.peg.1592	249	23.1722	7.73068	17.051	22.6733	30.1365	34.0357	6.60031	28.5365
locus_tag=F7O84_RS09895]	6666666.269962.peg.1593	336	60.462	14.084	58.2886	73.8428	89.3333	50.4457	42.7989	48.0627
locus_tag=F7O84_RS09890]	6666666.269962.peg.1594	1155	3.04843	0.463168	2.37156	2.70127	3.57333	2.93502	3.91304	2.79638
locus_tag=F7O84_RS09885]	6666666.269962.peg.1595	426	5.17656	0.629591	4.50096	5.23133	3.96338	5.30509	6.75137	5.30721
locus_tag=F7O84_RS09880]	6666666.269962.peg.1596	1437	51.6374	10.8075	45.8432	53.3487	44.9091	68.8056	31.7373	65.1806
locus_tag=F7O84_RS09875]	6666666.269962.peg.1597	294	0.106349	0.177249	0	0	0.638095	0	0	0
locus_tag=F7O84_RS09870]	6666666.269962.peg.1598	1131	1.74777	0.506105	0.484378	1.83906	1.49284	1.9982	1.8164	2.85571
locus_tag=F7O84_RS09865]	6666666.269962.peg.1599	2886	9.55345	6.49791	12.1962	15.5468	20.4111	3.32809	2.70496	3.13357
locus_tag=F7O84_RS14735]	6666666.269962.peg.16	990	76.2823	16.5267	52.708	65.4308	75.9874	112.428	61.4229	89.717
locus_tag=F7O84_RS03220]	6666666.269962.peg.160	723	96.0412	34.8369	57.7761	67.1955	58.6412	159.417	110.815	122.402
locus_tag=F7O84_RS09860]	6666666.269962.peg.1600	660	5.57309	4.41681	6.43287	11.0302	12.5067	0	2.49012	0.978731
locus_tag=F7O84_RS09855]	6666666.269962.peg.1601	1059	64.6092	7.21791	64.6638	56.8185	61.4704	53.885	83.4154	67.4022
locus_tag=F7O84_RS09850]	6666666.269962.peg.1602	1725	18.5264	1.82328	20.4047	21.3596	18.8144	18.9968	18.1021	13.481
locus_tag=F7O84_RS09845]	6666666.269962.peg.1603	2382	168.436	13.9406	153.575	155.743	193.9	171.253	181.976	154.169
locus_tag=F7O84_RS09840]	6666666.269962.peg.1604	738	20.1072	9.36531	10.7636	9.26046	12.2016	33.6852	26.7232	28.0092
locus_tag=F7O84_RS09835]	6666666.269962.peg.1605	1878	45.155	12.0578	33.5467	29.983	35.7618	64.3814	58.4143	48.8428
locus_tag=F7O84_RS09830]	6666666.269962.peg.1606	861	79.8951	22.4267	70.9445	45.8996	55.5609	118.773	106.416	81.7769
locus_tag=F7O84_RS09825]	6666666.269962.peg.1607	291	49.9729	24.0162	27.2974	31.1435	19.9849	100.961	49.4173	71.0337
locus_tag=F7O84_RS01515]	6666666.269962.peg.1608	1017	12.8387	2.40581	11.8508	13.586	18.8153	10.5554	13.332	8.89231
locus_tag=F7O84_RS01510]	6666666.269962.peg.1609	456	3.36839	1.44111	2.40277	5.53879	5.34824	2.47803	0.901029	3.54146
locus_tag=F7O84_RS03225]	6666666.269962.peg.161	402	240.9	62.3719	157.059	168.527	210	310.605	314.795	284.416
locus_tag=F7O84_RS01505]	6666666.269962.peg.1610	417	4.83051	1.28174	4.92654	6.05681	5.39856	5.41959	0.985298	6.19628
locus_tag=F7O84_RS01500]	6666666.269962.peg.1611	624	3.94723	1.27051	5.26761	4.04758	3.60769	6.33805	1.31689	3.10559
locus_tag=F7O84_RS07465]	6666666.269962.peg.1612	162	3.21492	1.15915	2.53626	6.41969	2.31605	3.4876	2.53623	1.99371
locus_tag=F7O84_RS01495]	6666666.269962.peg.1613	720	9.90363	1.85833	8.36965	7.4285	8.33777	10.986	10.8424	13.4576
locus_tag=F7O84_RS01490]	6666666.269962.peg.1614	438	48.7671	11.9611	53.1572	27.8145	33.8365	61.9169	59.0976	56.7798
locus_tag=F7O84_RS01485]	6666666.269962.peg.1615	336	6.6765	2.81907	5.70658	4.8639	6.14166	15.1337	2.44565	5.76752
locus_tag=F7O84_RS01480]	6666666.269962.peg.1616	1374	199.014	41.1984	143.238	191.389	178.452	265.637	159.384	255.987
locus_tag=F7O84_RS00625]	6666666.269962.peg.1617	147	131.915	35.6713	95.032	103.089	90.6094	180.644	139.751	182.364
locus_tag=F7O84_RS01475]	6666666.269962.peg.1618	1344	71.6549	2.99245	73.676	67.3207	68.3958	78.6112	70.3125	71.6134
locus_tag=F7O84_RS01470]	6666666.269962.peg.1619	1401	463.289	11.7762	452.225	464.798	492.634	448.848	467.763	453.465
locus_tag=F7O84_RS03230]	6666666.269962.peg.162	1152	172.978	69.6606	89.6408	94.9197	125.392	245.713	264.64	217.564
locus_tag=F7O84_RS01465]	6666666.269962.peg.1620	2019	54.3719	8.02738	66.41	62.6216	58.1662	43.6546	45.7878	49.591
locus_tag=F7O84_RS01460]	6666666.269962.peg.1621	2643	246.019	35.4653	309.619	280.726	254.108	204.363	208.311	218.987
locus_tag=F7O84_RS01455]	6666666.269962.peg.1622	1167	5.25202	1.57949	5.28115	6.36546	8.84147	4.35726	1.40829	5.25848
locus_tag=F7O84_RS01450]	6666666.269962.peg.1623	1140	4.23554	1.16183	6.00692	4.04006	3.78491	3.46925	2.16247	5.94966
locus_tag=F7O84_RS01445]	6666666.269962.peg.1624	942	7.35375	0.967173	7.7057	7.72816	6.57197	8.99669	5.234	7.88596
locus_tag=F7O84_RS01440]	6666666.269962.peg.1625	879	71.1627	56.6444	126.051	119.498	137.872	16.0692	11.6857	15.8
locus_tag=F7O84_RS01435]	6666666.269962.peg.1626	903	91.3147	73.3556	163.955	165.516	164.539	16.2678	23.6602	13.9494
locus_tag=F7O84_RS01430]	6666666.269962.peg.1627	1200	60.4612	48.4632	108.767	106.227	111.778	14.1248	11.6413	10.2277
locus_tag=F7O84_RS01425]	6666666.269962.peg.1628	630	54.5611	19.0255	41.3048	43.156	36.9244	85.1972	39.7826	81.0017
locus_tag=F7O84_RS01420]	6666666.269962.peg.1629	618	23.736	4.09432	22.3831	19.4728	20.9456	33.8264	25.9286	19.8597
locus_tag=F7O84_RS03235]	6666666.269962.peg.163	1413	988.609	243.192	722.203	744.532	769.518	1112.79	1447.49	1135.12
locus_tag=F7O84_RS01415]	6666666.269962.peg.1630	696	7.41734	1.80621	7.28081	4.69618	10.5121	9.74124	5.31297	6.9608
locus_tag=F7O84_RS01415]	6666666.269962.peg.1631	132	0.187588	0.312647	0	1.12553	0	0	0	0
locus_tag=F7O84_RS01410]	6666666.269962.peg.1632	345	1352.97	45.3272	1346.95	1381.48	1295.25	1351.07	1282.63	1460.44
locus_tag=F7O84_RS01405]	6666666.269962.peg.1633	1470	58.4884	5.86254	65.8702	65.0878	59.0876	61.4957	45.559	53.8302
locus_tag=F7O84_RS01400]	6666666.269962.peg.1634	840	804.525	130.239	695.876	666.265	681.166	1033.13	784.076	966.637
locus_tag=F7O84_RS01395]	6666666.269962.peg.1635	1662	644.714	15.3601	631.555	658.016	659.308	662.897	620.259	636.246
locus_tag=F7O84_RS01390]	6666666.269962.peg.1636	1494	41.4476	13.7584	54.6365	56.4844	54.4969	26.8503	22.276	33.9411
locus_tag=F7O84_RS01385]	6666666.269962.peg.1637	1452	422.957	75.0142	460.205	508.637	525.073	323.353	383.704	336.773
locus_tag=F7O84_RS01380]	6666666.269962.peg.1638	186	24.4661	13.1551	45.6526	35.9443	31.2666	12.1504	4.41795	17.3646
locus_tag=F7O84_RS01375]	6666666.269962.peg.1639	201	14.2203	10.1924	15.6718	29.5662	28	8.43271	2.04413	1.60687
locus_tag=F7O84_RS03240]	6666666.269962.peg.164	915	74.5686	6.63571	72.4455	70.9563	65.8137	88.9168	69.1518	80.1276
locus_tag=F7O84_RS01370]	6666666.269962.peg.1640	417	62.5272	12.0241	65.0304	80.5199	71.5309	69.0997	39.4119	49.5703
locus_tag=F7O84_RS01365]	6666666.269962.peg.1641	696	177.8	16.5717	178.675	191.903	150.134	175.342	158.208	212.537
locus_tag=F7O84_RS01360]	6666666.269962.peg.1642	1479	12.198	8.17616	2.77805	4.72129	4.56632	24.0666	18.0571	18.9989
locus_tag=F7O84_RS01355]	6666666.269962.peg.1643	1167	9.42807	6.81605	1.52567	2.29157	4.01885	22.2705	13.7309	12.7311
locus_tag=F7O84_RS01350]	6666666.269962.peg.1644	1065	9.05816	0.54296	9.38772	8.64914	9.33595	10.0797	8.10165	8.7948
locus_tag=F7O84_RS01345]	6666666.269962.peg.1645	1611	5.5356	0.999654	4.7608	4.88777	3.95928	5.61134	6.376	7.61843
locus_tag=F7O84_RS01340]	6666666.269962.peg.1646	924	0.112139	0.112139	0.148223	0.32158	0.20303	0	0	0
locus_tag=F7O84_RS01335]	6666666.269962.peg.1647	960	0.598902	0.399268	0.713322	0.619041	0.977082	0	1.28397	0
locus_tag=F7O84_RS01330]	6666666.269962.peg.1648	2055	16.853	4.30203	20.1938	21.5444	21.7269	16.4961	7.79752	13.3593
locus_tag=F7O84_RS01325]	6666666.269962.peg.1649	978	41.7435	13.9114	61.1969	53.0173	52.7505	34.6621	26.0469	22.787
locus_tag=F7O84_RS03245]	6666666.269962.peg.165	1230	107.61	24.4031	114.354	142.893	138.793	90.0312	79.5015	80.0889
locus_tag=F7O84_RS01320]	6666666.269962.peg.1650	1554	12.227	3.18276	15.3351	13.5759	16.6594	6.18073	8.72502	12.886
locus_tag=F7O84_RS01315]	6666666.269962.peg.1651	1101	0.519657	0.564966	0.248788	0.134941	0.681562	2.05265	0	0
locus_tag=F7O84_RS01310]	6666666.269962.peg.1652	384	39.3437	17.1627	44.226	64.2255	61.0677	38.2547	6.41983	21.8685
locus_tag=F7O84_RS01300]	6666666.269962.peg.1653	618	54.8433	25.3629	31.2477	29.5697	27.6239	102.393	67.1485	71.0768
locus_tag=F7O84_RS01295]	6666666.269962.peg.1654	744	75.844	11.3254	73.4492	72.6874	91.7827	63.7894	93.8814	59.4737
locus_tag=F7O84_RS01290]	6666666.269962.peg.1655	447	56.7914	9.66989	53.6189	40.2169	48.6836	74.5739	68.0186	55.6366
locus_tag=F7O84_RS01285]	6666666.269962.peg.1656	1398	58.6656	10.392	65.6379	67.0584	74.4763	55.3676	39.0884	50.3648
locus_tag=F7O84_RS01280]	6666666.269962.peg.1657	669	66.2621	16.2836	76.9748	77.283	93.3793	51.5164	51.589	46.8299
locus_tag=F7O84_RS01275]	6666666.269962.peg.1658	1161	112.59	23.3068	98.0293	128.991	166.109	107.061	81.0414	94.3072
locus_tag=F7O84_RS01270]	6666666.269962.peg.1659	567	85.6269	9.44779	93.7207	83.3249	105.876	71.745	83.3333	75.7611
locus_tag=F7O84_RS03250]	6666666.269962.peg.166	669	66.8714	16.5571	65.1011	49.9675	52.9991	108.1	49.7465	75.314
locus_tag=F7O84_RS01255]	6666666.269962.peg.1660	180	541.864	19.9918	556.201	531.55	538.828	558.714	570.652	495.238
locus_tag=F7O84_RS01250]	6666666.269962.peg.1661	675	195.019	34.854	169.625	154.953	155.916	251.945	211.826	225.848
locus_tag=F7O84_RS01245]	6666666.269962.peg.1662	1716	13.1224	3.3036	14.047	16.5366	18.6944	10.536	8.3802	10.5402
locus_tag=F7O84_RS01240]	6666666.269962.peg.1663	705	23.3727	3.54095	23.1177	20.2308	22.6184	31.2549	16.901	26.1134
locus_tag=F7O84_RS03745]	6666666.269962.peg.1664	123	1.27792	1.70389	0	2.41577	0	0	0	5.25173
locus_tag=F7O84_RS01235]	6666666.269962.peg.1665	759	1.31871	0.552949	0.902226	0.978721	1.23584	2.97756	0.54133	1.27661
locus_tag=F7O84_RS01230]	6666666.269962.peg.1666	489	2.00282	0.873544	1.12031	1.51912	1.9182	1.1554	1.68045	4.62345
locus_tag=F7O84_RS06340]	6666666.269962.peg.1667	132	0.236868	0.394781	0	0	1.42121	0	0	0
locus_tag=F7O84_RS01225]	6666666.269962.peg.1668	195	0.117058	0.195097	0.702348	0	0	0	0	0
locus_tag=F7O84_RS01220]	6666666.269962.peg.1669	330	1.01356	0.72503	0	0.900424	0	1.7121	2.49012	0.978731
locus_tag=F7O84_RS03260]	6666666.269962.peg.167	1857	852.29	169.74	679.184	641.403	727.063	1082.83	921.967	1061.3
locus_tag=F7O84_RS01215]	6666666.269962.peg.1670	831	0.545969	0.348394	0.329622	0.357569	0.451504	1.35979	0	0.777332
locus_tag=F7O84_RS01210]	6666666.269962.peg.1671	378	1.74208	0.86105	0.362322	0.786084	1.98518	1.49469	3.26087	2.56334
locus_tag=F7O84_RS01205]	6666666.269962.peg.1672	3750	189.152	35.8913	223.698	220.359	231.073	143.885	158.541	157.357
locus_tag=F7O84_RS01200]	6666666.269962.peg.1673	720	39.1993	10.353	34.4297	47.8725	46.6394	54.1451	17.1196	34.9896
locus_tag=F7O84_RS01195]	6666666.269962.peg.1674	936	97.379	25.8356	122.472	125.713	121.459	67.6059	75.9406	71.0835
locus_tag=F7O84_RS01190]	6666666.269962.peg.1675	939	86.094	18.2102	106.912	104.11	101.891	59.5678	77.0106	67.0728
locus_tag=F7O84_RS01185]	6666666.269962.peg.1676	795	680.039	60.3072	618.119	618.574	622.501	700.732	797.965	722.341
locus_tag=F7O84_RS01180]	6666666.269962.peg.1677	963	525.825	27.1677	461.931	533.34	595.722	518.643	515.4	529.917
locus_tag=F7O84_RS01175]	6666666.269962.peg.1678	1032	5213.33	401.504	4804.41	5291.94	5531.65	4521.58	6020.91	5109.49
locus_tag=F7O84_RS01170]	6666666.269962.peg.1679	447	529.8	408.501	628.719	979.165	1207.02	78.3658	152.582	132.95
locus_tag=F7O84_RS03265]	6666666.269962.peg.168	774	174.116	46.9788	122.625	157.208	171.118	258.407	104.575	230.761
locus_tag=F7O84_RS01165]	6666666.269962.peg.1680	624	819.614	364.062	773.9	1239.03	1492.38	603.926	384.532	423.913
locus_tag=F7O84_RS01160]	6666666.269962.peg.1681	789	352.925	84.9569	254.822	297.14	374.962	585.758	332.237	272.631
locus_tag=F7O84_RS01155]	6666666.269962.peg.1682	1707	596.833	144.271	391.377	443.795	531.808	991.301	587.541	635.178
locus_tag=F7O84_RS01150]	6666666.269962.peg.1683	1263	1295.22	78.4515	1271.98	1332.31	1422.97	1365.73	1217.32	1160.99
locus_tag=F7O84_RS01145]	6666666.269962.peg.1684	738	392.41	143.978	347.22	492.012	542.209	574.944	128.049	270.026
locus_tag=F7O84_RS01140]	6666666.269962.peg.1685	846	3434.54	1592.41	1579.39	1967.59	2032.78	6711.11	3381.17	4935.2
locus_tag=F7O84_RS17385]	6666666.269962.peg.1686	117	44044	32803.8	13187.8	9926.25	10606.6	107049	65272	58222.2
locus_tag=F7O84_RS01135]	6666666.269962.peg.1687	594	53.3717	13.9078	29.7434	57.277	54.006	69.435	35.2767	74.4923
locus_tag=F7O84_RS01130]	6666666.269962.peg.1688	1638	14.5754	2.46143	13.7961	15.4193	17.0649	18.6261	9.53177	13.0139
locus_tag=F7O84_RS01125]	6666666.269962.peg.1689	924	6.92341	3.27788	8.30048	10.9337	11.3697	5.50317	0.889327	4.54411
locus_tag=F7O84_RS03270]	6666666.269962.peg.169	1134	14.5468	8.79554	16.1837	24.8927	28.9506	6.97521	1.44927	8.8293
locus_tag=F7O84_RS01120]	6666666.269962.peg.1690	876	138.516	24.2095	149.153	171.127	167.898	115.449	105.062	122.408
locus_tag=F7O84_RS01115]	6666666.269962.peg.1691	2352	41.3378	8.7719	48.3895	48.26	53.6797	35.7924	30.0466	31.8587
locus_tag=F7O84_RS01110]	6666666.269962.peg.1692	231	101.386	45.9919	138.144	150.499	153.491	95.3882	10.6719	60.1221
locus_tag=F7O84_RS01105]	6666666.269962.peg.1693	822	6.64166	0.983735	4.99846	6.8682	5.47737	8.93539	6.49793	7.07258
locus_tag=F7O84_RS01100]	6666666.269962.peg.1694	1344	48.6542	5.52626	42.2898	46.0965	42.5729	53.8087	47.0788	60.0784
locus_tag=F7O84_RS01095]	6666666.269962.peg.1695	186	36.0545	8.5146	24.299	27.9567	33.2838	57.7142	33.1346	39.9386
locus_tag=F7O84_RS01090]	6666666.269962.peg.1696	885	10.5017	4.66393	6.03543	5.70777	6.78327	21.0675	13.9278	9.48872
locus_tag=F7O84_RS01085]	6666666.269962.peg.1697	717	6.28825	3.80155	3.43827	2.48653	2.09316	14.9719	5.73039	9.00924
locus_tag=F7O84_RS01080]	6666666.269962.peg.1698	327	3.78204	2.74551	2.09416	0.454342	0.5737	6.91122	3.76944	8.88939
locus_tag=F7O84_RS01075]	6666666.269962.peg.1699	186	465.621	57.7878	560.349	509.611	500.266	437.413	444.004	342.082
locus_tag=F7O84_RS14730]	6666666.269962.peg.17	909	268.941	91.6595	206.416	173.74	151.69	358.015	378.777	345.011
locus_tag=F7O84_RS03275]	6666666.269962.peg.170	1317	328.957	21.73	328.928	351.175	365.513	289.145	335.372	303.607
locus_tag=F7O84_RS01070]	6666666.269962.peg.1700	1350	85.249	11.0112	78.4211	93.434	92.8272	98.7689	59.0434	88.9993
locus_tag=F7O84_RS01065]	6666666.269962.peg.1701	603	26.4681	7.32932	35.2048	32.2764	33.9111	16.8654	21.804	18.7468
locus_tag=F7O84_RS01060]	6666666.269962.peg.1702	495	212.234	23.3231	184.547	192.691	189.495	223.714	250.672	232.286
locus_tag=F7O84_RS01055]	6666666.269962.peg.1703	381	81.3851	8.26513	81.959	67.0709	70.9039	91.9409	91.6638	84.772
locus_tag=F7O84_RS01050]	6666666.269962.peg.1704	3702	34.7777	4.53781	33.3701	29.3769	27.9727	39.2228	39.289	39.4348
locus_tag=F7O84_RS01045]	6666666.269962.peg.1705	3432	36.9441	2.63421	37.6714	36.0602	32.6332	44.1194	35.7954	35.3849
locus_tag=F7O84_RS01040]	6666666.269962.peg.1706	1431	221.282	22.8219	236.877	250.939	244.496	185.567	217.063	192.751
locus_tag=F7O84_RS01035]	6666666.269962.peg.1707	1473	86.9322	4.24545	87.5861	88.0526	95.0098	84.3844	89.8166	76.7437
locus_tag=F7O84_RS01030]	6666666.269962.peg.1708	294	22.574	9.2968	14.907	14.6549	14.6762	42.2783	18.1677	30.7601
locus_tag=F7O84_RS01025]	6666666.269962.peg.1709	195	48.0679	11.3445	33.0104	35.8092	54.8369	75.3322	46.3545	43.0642
locus_tag=F7O84_RS03285]	6666666.269962.peg.171	1479	101.235	12.9987	94.5463	80.8646	89.297	119.951	116.399	106.35
locus_tag=F7O84_RS05620]	6666666.269962.peg.1710	141	0.443498	0.739164	0	0	2.66099	0	0	0
locus_tag=F7O84_RS01020]	6666666.269962.peg.1711	1758	30.2174	4.8909	31.2401	37.2692	36.8157	28.9245	22.4365	24.6186
locus_tag=F7O84_RS01015]	6666666.269962.peg.1712	885	140.137	18.6246	119.935	126.914	120.403	160.241	137.421	175.906
locus_tag=F7O84_RS01010]	6666666.269962.peg.1713	2178	15.4057	4.0492	12.3878	14.3249	12.5756	22.0497	10.1868	20.9093
locus_tag=F7O84_RS01005]	6666666.269962.peg.1714	954	192.842	16.6186	204.001	207.593	201.365	206.098	142.986	195.008
locus_tag=F7O84_RS01000]	6666666.269962.peg.1715	1446	113.963	9.58489	112.616	118.465	113.001	137.145	87.5157	115.031
locus_tag=F7O84_RS00995]	6666666.269962.peg.1716	558	965.565	219.488	675.953	613.184	949.094	1244.4	1296.67	1014.09
locus_tag=F7O84_RS00990]	6666666.269962.peg.1717	843	105.729	10.8036	89.5181	89.5297	109.934	113.937	123.797	107.66
locus_tag=F7O84_RS00985]	6666666.269962.peg.1718	834	14.3349	4.39764	12.3164	19.2393	19.3448	17.6137	3.94119	13.5544
locus_tag=F7O84_RS00980]	6666666.269962.peg.1719	1716	46.613	2.13046	50.2817	47.8783	43.0736	48.0704	45.0137	45.3604
locus_tag=F7O84_RS03290]	6666666.269962.peg.172	672	142.598	9.06557	134.308	124.472	141.817	152.178	146.128	156.684
locus_tag=F7O84_RS00975]	6666666.269962.peg.1720	885	56.161	6.67242	55.2474	50.6984	60.8375	71.5018	45.0331	53.6477
locus_tag=F7O84_RS00970]	6666666.269962.peg.1721	690	104.984	45.9953	82.1747	46.9395	47.8516	180.961	142.316	129.661
locus_tag=F7O84_RS00965]	6666666.269962.peg.1722	606	160.309	24.6335	119.33	154.454	190.386	190.195	174.247	133.243
locus_tag=F7O84_RS00960]	6666666.269962.peg.1723	432	16.3055	2.6369	18.3879	20.6347	17.8046	13.0785	15.2174	12.7099
locus_tag=F7O84_RS00955]	6666666.269962.peg.1724	1569	135.713	8.64443	146.298	138.059	133.675	148.36	111.817	136.068
locus_tag=F7O84_RS00950]	6666666.269962.peg.1725	1182	606.394	105.135	742.84	691.818	699.928	485.644	510.98	507.152
locus_tag=F7O84_RS00945]	6666666.269962.peg.1726	897	182.018	27.3065	231.775	189.149	207.05	159.987	159.401	144.747
locus_tag=F7O84_RS00940]	6666666.269962.peg.1727	1224	250.242	85.4394	327.289	336.589	343.167	158.327	195.7	140.381
locus_tag=F7O84_RS00935]	6666666.269962.peg.1728	441	104.534	11.7519	117.703	89.6136	116.559	98.6494	114.596	90.0832
locus_tag=F7O84_RS00930]	6666666.269962.peg.1729	1041	502.384	209.697	705.84	688.474	741.929	274.083	324.433	279.545
locus_tag=F7O84_RS03295]	6666666.269962.peg.173	576	57.6345	5.10701	54.2125	51.8447	72.9555	54.9298	56.3519	55.5124
locus_tag=F7O84_RS00925]	6666666.269962.peg.1730	1224	10022.9	4019.22	13062.8	14530.4	14533.3	5285.26	6572.9	6153.01
locus_tag=F7O84_RS00920]	6666666.269962.peg.1731	591	1471.52	139.892	1573.05	1646.84	1415.73	1279.12	1300.04	1614.36
locus_tag=F7O84_RS00915]	6666666.269962.peg.1732	978	643.575	75.677	654.261	742.546	760.949	592.722	514.217	596.756
locus_tag=F7O84_RS00910]	6666666.269962.peg.1733	249	319.974	73.2586	255.765	378.883	302.872	385.737	181.509	415.076
locus_tag=F7O84_RS00905]	6666666.269962.peg.1734	840	716.154	195.666	803.975	944.126	987.356	513.201	493.043	555.22
locus_tag=F7O84_RS00900]	6666666.269962.peg.1735	1299	107.565	5.19028	108.175	100.419	110.48	119.61	105.01	101.693
locus_tag=F7O84_RS00895]	6666666.269962.peg.1736	132	59.175	28.7212	31.1268	30.3893	29.8454	81.3246	74.7035	107.66
locus_tag=F7O84_RS00890]	6666666.269962.peg.1737	504	80.0045	17.3355	90.49	94.3301	107.2	71.745	43.2065	73.0553
locus_tag=F7O84_RS00885]	6666666.269962.peg.1738	2064	67.1058	12.2452	59.6536	69.9661	80.348	86.7744	37.8223	68.0702
locus_tag=F7O84_RS00880]	6666666.269962.peg.1739	852	4.07188	1.14349	3.21497	2.26691	3.96338	5.30509	6.26913	3.41177
locus_tag=F7O84_RS03300]	6666666.269962.peg.174	792	260.956	40.4507	233.105	268.064	375.2	226.139	238.117	225.108
locus_tag=F7O84_RS00875]	6666666.269962.peg.1740	2049	58.3626	22.0467	35.8938	29.656	43.3979	102.575	66.7738	71.8787
locus_tag=F7O84_RS00870]	6666666.269962.peg.1741	381	296.801	149.617	127.971	152.079	161.503	510.124	356.949	472.18
locus_tag=F7O84_RS00865]	6666666.269962.peg.1742	1065	64.5902	16.8125	56.8407	48.2678	38.2246	89.656	67.5137	87.0382
locus_tag=F7O84_RS00860]	6666666.269962.peg.1743	1413	92.6044	13.486	77.1539	80.5411	79.6602	107.161	112.822	98.2887
locus_tag=F7O84_RS00855]	6666666.269962.peg.1744	618	65.9911	7.73798	71.8032	77.1698	62.2297	71.3097	46.5386	66.8958
locus_tag=F7O84_RS00850]	6666666.269962.peg.1745	741	19.4941	9.48313	9.42625	14.4359	12.9117	34.3112	12.753	33.1263
locus_tag=F7O84_RS00845]	6666666.269962.peg.1746	687	8.31025	1.19389	6.18005	9.08288	8.73827	10.6913	7.17676	7.99226
locus_tag=F7O84_RS00840]	6666666.269962.peg.1747	1272	124.68	15.7269	141.48	137.123	142.617	110.6	112.408	103.852
locus_tag=F7O84_RS00835]	6666666.269962.peg.1748	837	452.233	36.4459	400.074	432.22	440.871	449.563	561.57	429.098
locus_tag=F7O84_RS00830]	6666666.269962.peg.1749	1344	48.0115	4.80773	46.8755	51.4025	59.0437	46.2419	40.0475	44.458
locus_tag=F7O84_RS03305]	6666666.269962.peg.175	984	26.0183	3.86773	25.1925	31.405	31.2666	26.9864	17.9547	23.3045
locus_tag=F7O84_RS00825]	6666666.269962.peg.1750	966	31.7043	2.68911	30.7659	31.0674	31.4608	39.7717	28.0718	29.0884
locus_tag=F7O84_RS00820]	6666666.269962.peg.1751	1227	243.774	25.1493	234.96	260.572	302.423	216.88	234.065	213.742
locus_tag=F7O84_RS00815]	6666666.269962.peg.1752	1380	31.1198	2.41716	33.7432	31.3289	34.8011	31.1155	31.8573	23.8725
locus_tag=F7O84_RS00810]	6666666.269962.peg.1753	1539	52.9561	9.88555	62.739	65.9345	59.8515	46.2566	36.5751	46.38
locus_tag=F7O84_RS00805]	6666666.269962.peg.1754	186	19.1108	15.7586	3.68166	7.18887	5.04301	57.7142	13.2538	27.7833
locus_tag=F7O84_RS00800]	6666666.269962.peg.1755	246	18.8118	13.0679	5.56739	7.85126	3.813	32.154	26.7232	36.7621
locus_tag=F7O84_RS00795]	6666666.269962.peg.1756	1182	199.335	59.8475	147.039	141.28	130.145	264.332	250.623	262.593
locus_tag=F7O84_RS00775]	6666666.269962.peg.1757	1356	83.9739	3.15623	89.2852	78.4484	86.4675	84.1655	85.4463	80.0308
locus_tag=F7O84_RS00770]	6666666.269962.peg.1758	414	2198.31	540.584	1913.77	1598.02	1461.38	2856.35	2362.99	2997.33
locus_tag=F7O84_RS00765]	6666666.269962.peg.1759	2475	312.485	18.8065	311.102	294.559	275.374	338.082	332.68	323.112
locus_tag=F7O84_RS03310]	6666666.269962.peg.176	1266	96.3334	15.8218	87.3025	81.3262	72.9061	106.661	121.378	108.426
locus_tag=F7O84_RS00760]	6666666.269962.peg.1760	369	153.752	21.4998	144.01	142.933	109.815	185.268	163.68	176.808
locus_tag=F7O84_RS00755]	6666666.269962.peg.1761	594	19.5668	8.37386	21.2123	29.764	32.8458	13.3163	8.30039	11.9623
locus_tag=F7O84_RS00750]	6666666.269962.peg.1762	1434	64.8768	28.3316	40.1132	33.1537	36.3687	87.4674	95.9841	96.1737
locus_tag=F7O84_RS00745]	6666666.269962.peg.1763	1902	73.3605	33.9666	34.4195	40.4623	43.2999	119.118	94.1846	108.679
locus_tag=F7O84_RS00740]	6666666.269962.peg.1764	1500	247.791	11.9778	242.324	229.986	271.144	248.22	259.943	235.13
locus_tag=F7O84_RS00735]	6666666.269962.peg.1765	1632	1328.96	454.527	879.736	883.499	860.062	1873.61	1661.86	1814.99
locus_tag=F7O84_RS00730]	6666666.269962.peg.1766	258	859.314	366.946	565.88	445.134	466.091	1412.48	1248.53	1017.77
locus_tag=F7O84_RS00725]	6666666.269962.peg.1767	1413	154.184	56.959	94.31	94.7357	102.629	237.912	188.424	207.092
locus_tag=F7O84_RS00720]	6666666.269962.peg.1768	819	53.7636	29.763	24.0805	26.8478	21.0735	97.9595	68.2274	84.3932
locus_tag=F7O84_RS00715]	6666666.269962.peg.1769	834	739.042	163.827	558.506	578.247	588.893	1057.5	779.371	871.74
locus_tag=F7O84_RS03315]	6666666.269962.peg.177	1185	10.4607	3.76128	8.55264	15.5466	14.723	12.3964	1.73363	9.81209
locus_tag=F7O84_RS00710]	6666666.269962.peg.1770	7770	19.7148	2.52806	16.9919	16.2911	18.2771	21.6689	23.3196	21.7399
locus_tag=F7O84_RS00705]	6666666.269962.peg.1771	474	2070.9	520.477	1911.63	2567.06	3136.16	1737.89	1590.6	1482.03
locus_tag=F7O84_RS00700]	6666666.269962.peg.1772	2607	8.54432	0.595509	9.61384	7.80747	7.84364	8.88556	8.19532	8.92008
locus_tag=F7O84_RS00695]	6666666.269962.peg.1773	1368	9.13075	1.78099	8.30958	7.81947	7.54239	13.2162	7.50858	10.3883
locus_tag=F7O84_RS00690]	6666666.269962.peg.1774	996	22.7313	8.29542	25.0264	31.325	36.7289	19.2869	10.7255	13.2954
locus_tag=F7O84_RS00685]	6666666.269962.peg.1775	1899	50.4723	10.9663	57.4084	59.9287	66.9788	38.6777	40.8922	38.9483
locus_tag=F7O84_RS00680]	6666666.269962.peg.1776	1740	18.8127	1.17382	21.2521	19.8947	18.1131	18.5084	17.4738	17.634
locus_tag=F7O84_RS00675]	6666666.269962.peg.1777	429	35.3943	11.7488	29.3709	32.2075	52.0382	53.9969	19.1547	25.5976
locus_tag=F7O84_RS00670]	6666666.269962.peg.1778	1719	537.764	339.339	188.347	202.847	204.079	946.583	760.311	924.414
locus_tag=F7O84_RS00665]	6666666.269962.peg.1779	933	290.96	159.948	118.609	137.901	136.528	511.702	382.685	458.336
locus_tag=F7O84_RS03320]	6666666.269962.peg.178	537	4.02447	2.80382	2.29538	7.19333	9.08305	4.20851	0.76512	0.601455
locus_tag=F7O84_RS00660]	6666666.269962.peg.1780	1077	102.366	45.9897	60.7854	55.0412	53.3013	178.363	130.853	135.85
locus_tag=F7O84_RS00655]	6666666.269962.peg.1781	201	13443.4	7921.48	5990.71	5402.48	5172.53	28109	14053.4	21932.2
locus_tag=F7O84_RS00650]	6666666.269962.peg.1782	795	310.719	47.6026	310.266	337.132	427.114	273.612	282.182	234.009
locus_tag=F7O84_RS00645]	6666666.269962.peg.1783	411	339.506	131.112	351.892	467.037	592.925	180.083	243.922	201.176
locus_tag=F7O84_RS00640]	6666666.269962.peg.1784	585	9.75911	5.20146	10.067	20.0633	14.7514	9.65798	0.702341	3.31263
locus_tag=F7O84_RS00635]	6666666.269962.peg.1785	1458	36.8716	7.39364	42.3649	41.5751	43.8762	41.8512	25.6441	25.9183
locus_tag=F7O84_RS00630]	6666666.269962.peg.1786	864	12.693	4.84496	13.6324	18.5712	20.4102	10.4628	5.23097	7.85024
locus_tag=F7O84_RS00625]	6666666.269962.peg.1787	1026	22.2206	5.71962	30.1681	28.237	25.4156	15.9696	14.016	19.5174
locus_tag=F7O84_RS00620]	6666666.269962.peg.1788	1959	171.378	17.2141	162.546	185.959	186.738	182.274	128.567	182.182
locus_tag=F7O84_RS00615]	6666666.269962.peg.1789	1005	43.1027	1.74798	42.7908	43.0188	48.3466	38.7905	42.9266	42.7428
locus_tag=F7O84_RS03325]	6666666.269962.peg.179	1155	75.0034	20.7134	52.0559	40.905	79.7502	109.574	97.826	69.9094
locus_tag=F7O84_RS00610]	6666666.269962.peg.1790	1272	227.809	26.4771	216.204	188.983	198.809	258.066	274.236	230.556
locus_tag=F7O84_RS00605]	6666666.269962.peg.1791	627	74.96	35.8159	48.0554	33.1735	36.2035	128.858	103.536	99.9336
locus_tag=F7O84_RS00600]	6666666.269962.peg.1792	1026	136.708	24.7155	116.401	98.9018	125.798	187.78	159.783	131.585
locus_tag=F7O84_RS00595]	6666666.269962.peg.1793	516	116.762	14.0927	120.767	100.486	127.975	120.444	140.141	90.7603
locus_tag=F7O84_RS00590]	6666666.269962.peg.1794	1128	156.904	8.01882	173.504	155.814	162.487	158.779	144.241	146.601
locus_tag=F7O84_RS00585]	6666666.269962.peg.1795	2082	289.562	57.371	324.962	362.434	348.528	294.436	164.387	242.624
locus_tag=F7O84_RS00580]	6666666.269962.peg.1796	204	78.9578	10.731	101.376	76.4698	84.6038	83.087	66.4642	61.7464
locus_tag=F7O84_RS00575]	6666666.269962.peg.1797	465	38.2986	11.2721	26.508	36.1041	30.258	63.1819	26.5077	47.2317
locus_tag=F7O84_RS02305]	6666666.269962.peg.1798	153	420.469	110.102	388.495	249.559	293.048	572.377	561.253	458.085
locus_tag=F7O84_RS00570]	6666666.269962.peg.1799	675	554.95	109.873	531.397	397.507	406.327	662.087	717.043	615.339
locus_tag=F7O84_RS14725]	6666666.269962.peg.18	738	171.237	29.2618	143.268	141.323	141.335	222.781	178.711	200.003
locus_tag=F7O84_RS03330]	6666666.269962.peg.180	939	103.838	36.4803	71.9065	64.2379	65.9297	152.229	133.894	134.834
locus_tag=F7O84_RS00565]	6666666.269962.peg.1800	903	500.806	39.5384	557.387	472.857	474.297	481.776	562.841	455.679
locus_tag=F7O84_RS00560]	6666666.269962.peg.1801	777	363.535	19.5159	389.898	329.263	339.949	362.845	389.718	369.537
locus_tag=F7O84_RS00555]	6666666.269962.peg.1802	924	419.702	22.0729	398.719	385.896	460.472	433.527	431.324	408.271
locus_tag=F7O84_RS00550]	6666666.269962.peg.1803	1287	726.202	136.498	848.564	857.365	882.171	550.505	654.454	564.151
locus_tag=F7O84_RS00545]	6666666.269962.peg.1804	2469	35.3325	4.40884	36.4999	37.9097	44.6775	35.4693	26.9586	30.4798
locus_tag=F7O84_RS00540]	6666666.269962.peg.1805	1680	37.2654	9.82901	45.1635	46.4281	49.6916	26.5681	24.2119	31.5291
locus_tag=F7O84_RS00535]	6666666.269962.peg.1806	2418	408.463	13.5731	425.94	412.1	401.113	428.067	379.094	404.461
locus_tag=F7O84_RS00530]	6666666.269962.peg.1807	1251	500.716	59.3344	555.386	558.889	557.851	402.856	508.742	420.573
locus_tag=F7O84_RS00525]	6666666.269962.peg.1808	1050	207.589	25.0693	174.654	196.82	207.61	261.511	176.087	228.855
locus_tag=F7O84_RS00520]	6666666.269962.peg.1809	1491	104.099	42.3343	60.8089	62.0785	62.4075	168.247	118.769	152.284
locus_tag=F7O84_RS03335]	6666666.269962.peg.181	411	31.0056	16.7756	40.3209	49.1618	53.8608	15.1214	14.9952	12.5735
locus_tag=F7O84_RS00515]	6666666.269962.peg.1810	993	76.0174	18.8543	51.5833	56.5553	64.2336	97.2947	111.303	75.1346
locus_tag=F7O84_RS00510]	6666666.269962.peg.1811	1164	32.1287	11.867	22.944	19.1456	18.6955	54.3635	39.8868	37.7367
locus_tag=F7O84_RS00505]	6666666.269962.peg.1812	870	116.746	25.9699	97.6022	99.9005	74.8243	144.17	121.372	162.604
locus_tag=F7O84_RS00500]	6666666.269962.peg.1813	756	313.265	67.3607	257.068	265.5	215.144	376.661	365.761	399.454
locus_tag=F7O84_RS00495]	6666666.269962.peg.1814	891	203.137	29.4668	174.464	192.424	154.122	229.548	230.105	238.158
locus_tag=F7O84_RS09865]	6666666.269962.peg.1815	162	60.7124	30.3849	36.353	25.6787	28.9506	101.141	68.4782	103.673
locus_tag=F7O84_RS00490]	6666666.269962.peg.1816	1152	408.898	30.7162	443.568	452.545	409.398	343.311	382.337	422.231
locus_tag=F7O84_RS00485]	6666666.269962.peg.1817	930	137.836	23.8881	135.338	156.877	147.256	181.04	77.3141	129.193
locus_tag=F7O84_RS00480]	6666666.269962.peg.1818	516	296.289	36.5922	290.107	324.205	319.574	326.294	192.695	324.859
locus_tag=F7O84_RS00475]	6666666.269962.peg.1819	1326	104.845	8.35836	86.8639	100.279	104.128	115.47	119.295	103.033
locus_tag=F7O84_RS03340]	6666666.269962.peg.182	909	179.02	28.5052	194.061	212.64	215.874	156.631	132.888	162.024
locus_tag=F7O84_RS00470]	6666666.269962.peg.1820	690	14.4489	2.55317	11.1154	13.5651	12.5067	22.1084	14.2911	13.1065
locus_tag=F7O84_RS00465]	6666666.269962.peg.1821	174	38.6005	6.57	43.2913	43.5464	40.9701	42.212	18.8905	42.6929
locus_tag=F7O84_RS00460]	6666666.269962.peg.1822	2586	149.674	35.7046	185.629	180.513	189.994	103.778	121.227	116.903
locus_tag=F7O84_RS00455]	6666666.269962.peg.1823	1872	52.9208	3.23191	54.2857	51.6661	47.6015	49.799	59.4795	54.6929
locus_tag=F7O84_RS00450]	6666666.269962.peg.1824	222	161.994	18.7693	180.76	182.701	164.784	160.336	107.344	176.039
locus_tag=F7O84_RS00445]	6666666.269962.peg.1825	363	26.968	8.59504	25.2787	33.152	34.6259	38.9113	14.7143	15.1258
locus_tag=F7O84_RS00440]	6666666.269962.peg.1826	1248	2929.39	159.438	3036.01	3171.04	2836.24	2992.46	2544.23	2996.38
locus_tag=F7O84_RS00435]	6666666.269962.peg.1827	1161	2191.98	125.216	2152.87	2062.19	1985.23	2274.08	2199.09	2478.42
locus_tag=F7O84_RS00430]	6666666.269962.peg.1828	984	156.512	26.3064	182.054	190.242	176.161	148.138	113.156	129.324
locus_tag=F7O84_RS00425]	6666666.269962.peg.1829	921	107.776	18.3168	103.499	121.308	115.9	133.12	57.1024	115.726
locus_tag=F7O84_RS03345]	6666666.269962.peg.183	1308	170.119	40.6066	142.822	115.63	130.086	228.502	199.466	204.209
locus_tag=F7O84_RS00420]	6666666.269962.peg.1830	594	150.529	10.379	151.945	170.08	147.49	157.893	122.431	153.335
locus_tag=F7O84_RS00415]	6666666.269962.peg.1831	2337	184.722	31.8475	197.789	217.038	234.881	159.803	158.405	140.415
locus_tag=F7O84_RS00410]	6666666.269962.peg.1832	1299	1026.14	76.5582	1105.68	913.265	919.802	1105.19	1097.23	1015.69
locus_tag=F7O84_RS00405]	6666666.269962.peg.1833	582	400.421	41.0236	419.11	394.144	374.555	504.804	350.863	359.053
locus_tag=F7O84_RS00400]	6666666.269962.peg.1834	1290	3027.97	679.103	2499.96	2445.53	2101.12	3852.46	3254.79	4013.98
locus_tag=F7O84_RS00395]	6666666.269962.peg.1835	669	127.619	35.4044	83.3212	93.4947	99.8289	163.839	157.224	168.008
locus_tag=F7O84_RS00390]	6666666.269962.peg.1836	204	105.892	74.5065	28.1972	42.9687	22.9902	235.413	149.041	156.741
locus_tag=F7O84_RS00385]	6666666.269962.peg.1837	453	39.2703	24.8412	13.0004	10.823	19.464	91.0473	43.5358	57.7516
locus_tag=F7O84_RS00380]	6666666.269962.peg.1838	555	45.4085	11.4642	29.6125	31.3201	40.9001	69.2242	49.6004	51.7934
locus_tag=F7O84_RS00375]	6666666.269962.peg.1839	582	36.2893	9.04309	41.6521	45.6942	42.2261	42.7142	12.7073	32.7421
locus_tag=F7O84_RS03350]	6666666.269962.peg.184	864	535.299	46.7639	575.413	488.011	517.419	563.03	607.744	460.174
locus_tag=F7O84_RS00370]	6666666.269962.peg.1840	1776	145.161	10.1497	134.644	138.364	138.482	138.703	163.098	157.672
locus_tag=F7O84_RS00365]	6666666.269962.peg.1841	738	10.8225	0.88923	12.6194	9.26046	11.6932	10.718	10.5779	10.0658
locus_tag=F7O84_RS00360]	6666666.269962.peg.1842	1281	137.369	53.9726	181.114	182.32	210.592	76.7436	89.4868	83.96
locus_tag=F7O84_RS00355]	6666666.269962.peg.1843	1410	2.90695	0.715549	4.0796	3.58254	2.39489	2.80492	3.20536	1.37439
locus_tag=F7O84_RS00350]	6666666.269962.peg.1844	831	11.0438	4.08777	14.0089	17.1633	14.2224	7.47883	4.44985	8.93932
locus_tag=F7O84_RS00345]	6666666.269962.peg.1845	999	24.9287	3.64839	24.9513	28.7027	27.7926	28.2779	13.9835	25.8644
locus_tag=F7O84_RS00340]	6666666.269962.peg.1846	456	50.5097	23.1555	55.5641	84.3851	81.0464	28.4974	15.3175	38.2478
locus_tag=F7O84_RS00335]	6666666.269962.peg.1847	1293	3982.08	1405.43	6467.84	5399.3	4295.35	2215.4	2867.51	2647.05
locus_tag=F7O84_RS00330]	6666666.269962.peg.1848	468	205.823	81.6814	265.136	289.521	307.856	143.662	98.3277	130.435
locus_tag=F7O84_RS00325]	6666666.269962.peg.1849	579	15385.9	2104.36	15535.8	18617.9	18317.1	13706.2	11635.6	14502.9
locus_tag=F7O84_RS03355]	6666666.269962.peg.185	771	320.347	82.2311	240.698	263.803	216.312	460.934	313.881	426.453
locus_tag=F7O84_RS00320]	6666666.269962.peg.1850	753	1313.33	571.524	837.389	742.258	645.762	1854.04	1801.71	1998.8
locus_tag=F7O84_RS00315]	6666666.269962.peg.1851	909	558.294	35.096	587.909	554.399	569.404	515.268	622.858	499.928
locus_tag=F7O84_RS00310]	6666666.269962.peg.1852	669	169.999	25.8191	148.013	147.682	136.844	191.709	193.459	202.286
locus_tag=F7O84_RS00305]	6666666.269962.peg.1853	1284	102.358	32.3557	70.2922	93.8397	95.1149	170.73	53.1186	131.054
locus_tag=F7O84_RS07660]	6666666.269962.peg.1854	174	38199.5	9138.92	35554	27895.3	23732.5	40296.3	59382.4	42336.5
locus_tag=F7O84_RS13570]	6666666.269962.peg.1855	147	5767.09	1783.51	3503.14	4270.12	5411.04	10673.3	4533.54	6211.35
locus_tag=F7O84_RS00295]	6666666.269962.peg.1856	348	25.996	8.71082	34.633	37.1425	32.3448	24.3531	7.08395	20.4184
locus_tag=F7O84_RS00290]	6666666.269962.peg.1857	894	35.2237	9.62713	24.8179	34.899	25.1812	55.6144	27.1155	43.7145
locus_tag=F7O84_RS00810]	6666666.269962.peg.1858	153	0.204357	0.340595	0	0	1.22614	0	0	0
locus_tag=F7O84_RS00285]	6666666.269962.peg.1859	3006	25.1633	3.85866	23.9198	22.7352	19.5963	32.1403	22.8261	29.7624
locus_tag=F7O84_RS03360]	6666666.269962.peg.186	366	49.5009	16.4318	30.6846	31.2565	44.5934	98.7964	44.9037	46.7705
locus_tag=F7O84_RS00280]	6666666.269962.peg.1860	789	208.307	33.9556	216.633	248.37	261.784	187.615	174.971	160.467
locus_tag=F7O84_RS00275]	6666666.269962.peg.1861	1014	75.1006	6.7491	74.2868	75.1641	77.3341	93.0509	60.3743	70.3934
locus_tag=F7O84_RS00235]	6666666.269962.peg.1862	960	544.727	44.7909	493.619	489.662	558.305	522.617	665.523	538.639
locus_tag=F7O84_RS00230]	6666666.269962.peg.1863	489	63.6088	22.0295	40.0511	39.8009	44.8859	110.919	68.0581	77.9382
locus_tag=F7O84_RS00225]	6666666.269962.peg.1864	600	152.544	51.7956	100.892	98.799	102.555	240.122	200.641	172.257
locus_tag=F7O84_RS00220]	6666666.269962.peg.1865	1077	272.201	30.9584	228.39	257.549	255.533	347.284	254.457	289.993
locus_tag=F7O84_RS00215]	6666666.269962.peg.1866	1713	210.903	15.5922	199.88	186.905	201.618	247.04	208.433	221.543
locus_tag=F7O84_RS00210]	6666666.269962.peg.1867	1149	426.906	110.81	349.368	311.234	287.686	586.628	470.229	556.293
locus_tag=F7O84_RS00205]	6666666.269962.peg.1868	543	152.931	24.5141	123.59	138.994	145.45	212.262	130.146	167.141
locus_tag=F7O84_RS00200]	6666666.269962.peg.1869	303	1.54783	0.740517	1.80802	1.96132	3.09571	0	1.356	1.06595
locus_tag=F7O84_RS03365]	6666666.269962.peg.187	1611	25.602	7.51938	16.8328	20.0122	19.7964	40.6822	23.2086	33.08
locus_tag=F7O84_RS06515]	6666666.269962.peg.1870	240	4.24191	3.78712	0	0.619041	1.56333	11.7707	3.42391	8.07453
locus_tag=F7O84_RS00190]	6666666.269962.peg.1871	552	3628.23	1210.81	4359.08	5118.66	5039.37	2689.85	2011.92	2550.5
locus_tag=F7O84_RS00185]	6666666.269962.peg.1872	486	225.353	34.2773	189.656	227.746	202.654	290.634	180.918	260.512
locus_tag=F7O84_RS00180]	6666666.269962.peg.1873	528	4280.64	1484.52	5782.58	5975.16	5537.75	3206.97	2125.94	3055.48
locus_tag=F7O84_RS00175]	6666666.269962.peg.1874	1161	7881.08	2946.2	8968.09	11334.3	12179.4	5455.75	4110.82	5238.08
locus_tag=F7O84_RS03205]	6666666.269962.peg.1875	717	19.3422	4.62255	18.5285	20.5138	26.1646	25.2158	10.3147	15.3157
locus_tag=F7O84_RS03200]	6666666.269962.peg.1876	3546	4145.07	277.64	4332.87	3892.9	3615.82	4093.56	4468.35	4466.91
locus_tag=F7O84_RS03195]	6666666.269962.peg.1877	1482	553.633	315.628	205.899	236.589	271.526	1081.19	708.902	817.696
locus_tag=F7O84_RS03190]	6666666.269962.peg.1878	3750	180.976	26.4521	180.383	227.094	214.214	164.224	141.12	158.821
locus_tag=F7O84_RS03185]	6666666.269962.peg.1879	738	20.8663	2.01032	18.9291	18.3196	19.3192	26.0294	21.1559	21.4446
locus_tag=F7O84_RS03370]	6666666.269962.peg.188	864	38.348	2.885	43.2749	38.5181	41.906	35.312	35.1902	35.8868
locus_tag=F7O84_RS03180]	6666666.269962.peg.1880	219	223.133	44.2872	168.227	145.178	233.001	268.307	285.17	238.918
locus_tag=F7O84_RS00415]	6666666.269962.peg.1881	153	1.02906	0.730679	0.89515	1.94209	1.22614	0	0	2.11099
locus_tag=F7O84_RS03175]	6666666.269962.peg.1882	462	7.87386	2.08962	5.33602	5.46686	7.30908	12.2293	7.11462	9.78731
locus_tag=F7O84_RS03170]	6666666.269962.peg.1883	270	27.0036	4.31994	27.8988	26.9627	27.7926	16.7405	24.3478	38.2793
locus_tag=F7O84_RS03165]	6666666.269962.peg.1884	789	73.794	9.91395	74.6412	60.0682	57.7779	75.189	87.4855	87.602
locus_tag=F7O84_RS03160]	6666666.269962.peg.1885	2526	27.5398	3.55719	22.2299	23.056	26.6621	31.5376	32.8565	28.897
locus_tag=F7O84_RS03155]	6666666.269962.peg.1886	834	124.23	24.4132	97.3813	133.428	145.761	155.813	77.8385	135.156
locus_tag=F7O84_RS03150]	6666666.269962.peg.1887	1557	164.64	5.13218	157.629	171.662	171.936	157.849	165.72	163.046
locus_tag=F7O84_RS03145]	6666666.269962.peg.1888	1779	195.766	7.88051	188.769	190.076	195.614	193.73	219.407	186.999
locus_tag=F7O84_RS03140]	6666666.269962.peg.1889	504	29.1982	10.2235	20.3806	25.9408	21.2166	51.5667	37.5	18.5842
locus_tag=F7O84_RS03375]	6666666.269962.peg.189	1647	29.914	2.31531	28.273	31.3016	26.084	34.9904	28.439	30.3959
locus_tag=F7O84_RS03135]	6666666.269962.peg.1890	1176	3168.85	101.509	3087.14	3306.06	3266.89	2946.03	3199.96	3207.02
locus_tag=F7O84_RS03130]	6666666.269962.peg.1891	2406	345.346	27.3211	371.824	374.018	372.159	298.934	327.193	327.948
locus_tag=F7O84_RS03125]	6666666.269962.peg.1892	219	95.6514	26.6676	63.1632	73.2674	87.3753	144.473	78.7969	126.833
locus_tag=F7O84_RS03120]	6666666.269962.peg.1893	1020	46.9193	12.189	33.8367	33.938	36.4164	66.4696	60.8248	50.0304
locus_tag=F7O84_RS03115]	6666666.269962.peg.1894	1188	8.95822	0.580149	10.0297	8.75412	7.42188	9.03607	8.99209	9.51544
locus_tag=F7O84_RS03110]	6666666.269962.peg.1895	930	241.061	20.4718	256.686	240.907	194.257	226.604	266.402	261.511
locus_tag=F7O84_RS03105]	6666666.269962.peg.1896	576	12.8402	2.21909	19.4975	12.3808	12.0507	10.7898	9.98641	12.3361
locus_tag=F7O84_RS03100]	6666666.269962.peg.1897	552	39.9634	13.4945	43.1715	64.8648	52.3376	25.5884	24.5628	29.2556
locus_tag=F7O84_RS03095]	6666666.269962.peg.1898	1173	149.692	8.02674	143.496	143.757	146.977	167.619	140.459	155.846
locus_tag=F7O84_RS03090]	6666666.269962.peg.1899	720	266.904	40.9266	233.399	234.204	211.31	351.55	265.924	305.038
locus_tag=F7O84_RS14720]	6666666.269962.peg.19	846	105.967	8.97772	90.6577	97.9929	105.331	132.9	103.931	104.988
locus_tag=F7O84_RS03380]	6666666.269962.peg.190	1293	32.6096	5.15535	27.7517	25.7383	28.8727	37.5787	34.0008	41.7153
locus_tag=F7O84_RS03085]	6666666.269962.peg.1900	1476	61.8601	14.8028	44.2608	47.1075	53.7634	91.103	57.9003	77.0254
locus_tag=F7O84_RS03080]	6666666.269962.peg.1901	684	66.7824	17.3222	58.2672	44.3103	45.8029	90.8613	79.2906	82.1619
locus_tag=F7O84_RS03075]	6666666.269962.peg.1902	540	22.0839	10.4255	12.9349	20.0845	20.8444	53.3603	9.13043	16.1491
locus_tag=F7O84_RS03070]	6666666.269962.peg.1903	180	0.137565	0.229275	0	0.825388	0	0	0	0
locus_tag=F7O84_RS03065]	6666666.269962.peg.1904	771	0.64421	0.498655	0.355273	0.192698	1.94656	0	0.532904	0.837825
locus_tag=F7O84_RS05840]	6666666.269962.peg.1905	129	8111.47	1868.24	11699.8	8276.15	9963.15	5991.54	7873.4	4864.75
locus_tag=F7O84_RS03055]	6666666.269962.peg.1906	885	41.7579	7.60014	40.391	51.2021	55.1141	35.1125	32.9624	35.7652
locus_tag=F7O84_RS03050]	6666666.269962.peg.1907	813	17.0138	1.31164	16.3406	17.9088	17.9985	14.5939	16.172	19.069
locus_tag=F7O84_RS03045]	6666666.269962.peg.1908	1245	12.9045	1.27288	15.1809	12.53	12.5067	13.1605	14.1907	9.85807
locus_tag=F7O84_RS03040]	6666666.269962.peg.1909	867	10.7686	2.44004	12.3215	13.0234	14.281	10.4266	7.10847	7.45055
locus_tag=F7O84_RS03385]	6666666.269962.peg.191	2307	73.4138	2.62762	73.9703	74.1884	72.2101	68.328	79.9655	71.8203
locus_tag=F7O84_RS03035]	6666666.269962.peg.1910	234	224.375	9.36793	206.022	226.029	223.677	248.693	226.505	215.321
locus_tag=F7O84_RS03030]	6666666.269962.peg.1911	468	50.8926	17.1887	29.5571	40.317	36.4777	76.0566	45.6521	77.2947
locus_tag=F7O84_RS03025]	6666666.269962.peg.1912	2151	48.5245	6.17077	40.3042	39.9226	46.8345	56.9982	55.5848	51.5028
locus_tag=F7O84_RS03020]	6666666.269962.peg.1913	240	885.309	254.504	966.124	1063.51	1389.8	548.513	802.907	540.994
locus_tag=F7O84_RS03015]	6666666.269962.peg.1914	876	45.0222	6.58233	42.5257	53.2545	56.5369	43.8578	33.7701	40.1883
locus_tag=F7O84_RS03010]	6666666.269962.peg.1915	1542	470.419	8.39591	473.313	468.641	470.824	447.01	491.871	470.857
locus_tag=F7O84_RS03005]	6666666.269962.peg.1916	1092	572.9	22.4692	587.088	573.055	581.01	505.492	598.62	592.132
locus_tag=F7O84_RS03000]	6666666.269962.peg.1917	528	147.668	32.1017	158.747	178.396	202.167	99.5156	117.502	129.682
locus_tag=F7O84_RS02995]	6666666.269962.peg.1918	1854	64.3767	8.28906	55.6253	59.2997	62.5333	76.795	55.1815	76.8257
locus_tag=F7O84_RS02990]	6666666.269962.peg.1919	1797	59.0726	6.2465	73.0137	59.6099	51.4673	50.9342	63.3338	56.0769
locus_tag=F7O84_RS03390]	6666666.269962.peg.192	1104	157.986	7.67132	141.176	154.491	168.908	155.577	170.079	157.687
locus_tag=F7O84_RS02985]	6666666.269962.peg.1920	621	24.8746	3.85414	22.9366	22.0104	19.334	23.6551	26.465	34.8466
locus_tag=F7O84_RS02980]	6666666.269962.peg.1921	2214	18.2376	2.03786	16.5166	17.313	16.862	21.436	16.1453	21.1528
locus_tag=F7O84_RS02975]	6666666.269962.peg.1922	831	9.46465	0.881431	9.0646	8.76044	9.70733	8.83862	11.8663	8.55065
locus_tag=F7O84_RS02970]	6666666.269962.peg.1923	897	6.06605	2.01241	6.71811	4.80326	3.97369	4.40908	11.4512	5.04096
locus_tag=F7O84_RS02965]	6666666.269962.peg.1924	1293	11.6352	4.97658	7.5205	5.05574	7.39953	16.1676	18.4303	15.2373
locus_tag=F7O84_RS02960]	6666666.269962.peg.1925	861	25.0797	4.3817	20.3608	22.7773	18.9561	27.5606	30.0636	30.7601
locus_tag=F7O84_RS02955]	6666666.269962.peg.1926	372	362.476	138.168	253.667	220.059	199.199	496.646	417.496	587.791
locus_tag=F7O84_RS02950]	6666666.269962.peg.1927	459	242.513	12.5057	230.65	227.872	235.011	257.262	239.002	265.281
locus_tag=F7O84_RS02945]	6666666.269962.peg.1928	165	59.8335	18.006	49.8029	58.5275	54.5745	99.3016	22.4111	74.3836
locus_tag=F7O84_RS02940]	6666666.269962.peg.1929	639	61.0831	9.4327	56.3692	53.2434	47.2669	82.2289	59.1549	68.2355
locus_tag=F7O84_RS03395]	6666666.269962.peg.193	1833	38.1585	7.97407	30.0366	34.2854	31.2155	51.7832	33.1744	48.456
locus_tag=F7O84_RS02935]	6666666.269962.peg.1930	579	54.2657	15.2252	32.8794	48.2403	46.981	80.0161	43.2867	74.1909
locus_tag=F7O84_RS02930]	6666666.269962.peg.1931	402	30.0124	4.14828	29.6401	28.4574	37.3333	35.1363	28.6178	20.8893
locus_tag=F7O84_RS02925]	6666666.269962.peg.1932	1869	31.2099	3.82959	28.9451	27.9016	25.2944	40.2054	33.6346	31.2786
locus_tag=F7O84_RS02925]	6666666.269962.peg.1933	1161	53.462	4.60628	56.6234	46.708	49.6065	60.8303	50.2527	56.7512
locus_tag=F7O84_RS02920]	6666666.269962.peg.1934	465	4.95479	1.83138	3.5344	3.51456	3.63096	3.64511	7.06872	8.335
locus_tag=F7O84_RS02915]	6666666.269962.peg.1935	456	2.89878	1.46322	1.20138	1.30324	3.70263	3.71705	1.80206	5.66634
locus_tag=F7O84_RS02910]	6666666.269962.peg.1936	981	1.99658	0.75381	1.11688	1.21158	1.7211	2.30374	1.67531	3.95084
locus_tag=F7O84_RS02905]	6666666.269962.peg.1937	402	18.3401	2.87875	18.3973	14.0439	14	22.4872	19.4192	21.6928
locus_tag=F7O84_RS02900]	6666666.269962.peg.1938	750	1275.66	282.219	1029.56	987.495	963.263	1594.03	1465.98	1613.61
locus_tag=F7O84_RS02895]	6666666.269962.peg.1939	1191	1787.75	75.4584	1720.66	1697.76	1732.98	1773.25	2008.81	1793.08
locus_tag=F7O84_RS03400]	6666666.269962.peg.194	1632	31.5158	16.8253	17.1197	15.1119	11.8399	64.0463	41.7919	39.1852
locus_tag=F7O84_RS02890]	6666666.269962.peg.1940	1014	5897.47	428.85	5705.77	5965.65	5220.6	6195.97	5479.47	6817.33
locus_tag=F7O84_RS02885]	6666666.269962.peg.1941	1665	91.0608	26.4856	62.9266	65.6741	65.1247	132.34	99.4476	120.851
locus_tag=F7O84_RS02880]	6666666.269962.peg.1942	1089	74.5811	6.10461	76.465	81.311	68.2181	83.5296	62.6302	75.3327
locus_tag=F7O84_RS02875]	6666666.269962.peg.1943	1179	0.625074	0.365741	0.813151	0.504054	1.11382	0	1.04547	0.273945
locus_tag=F7O84_RS02870]	6666666.269962.peg.1944	1398	1.11415	0.436245	0.587802	0.637639	1.20772	0.808286	2.05729	1.38619
locus_tag=F7O84_RS02865]	6666666.269962.peg.1945	1032	659.287	110.256	787.242	810.8	710.589	563.897	491.69	591.507
locus_tag=F7O84_RS02860]	6666666.269962.peg.1946	885	351.181	114.611	213.407	302.344	267.515	527.964	277.627	518.23
locus_tag=F7O84_RS02855]	6666666.269962.peg.1947	609	25.1233	12.9167	27.2117	38.5452	48.3632	13.9161	9.44527	13.2587
locus_tag=F7O84_RS02850]	6666666.269962.peg.1948	537	72.4603	6.15968	76.7678	73.87	70.2189	85.2222	58.9142	69.7688
locus_tag=F7O84_RS02845]	6666666.269962.peg.1949	798	90.6137	16.1436	96.6257	107.983	115.663	81.4211	77.2311	64.7582
locus_tag=F7O84_RS03405]	6666666.269962.peg.195	612	1.61569	0.501509	1.7903	2.18485	2.14575	1.84638	0.671355	1.05549
locus_tag=F7O84_RS02840]	6666666.269962.peg.1950	1554	2828.52	536.127	2486.92	2201.59	2188.66	3307.06	3608.19	3178.69
locus_tag=F7O84_RS02835]	6666666.269962.peg.1951	633	7.91913	1.45189	10.3854	7.74535	7.11279	8.03306	4.54358	9.69454
locus_tag=F7O84_RS02830]	6666666.269962.peg.1952	1038	209.46	39.2817	196.86	153.866	162.659	265.622	271.142	206.608
locus_tag=F7O84_RS02825]	6666666.269962.peg.1953	177	4118.46	2136.92	2207.58	2553.39	2414.42	8184.4	2887.69	6463.28
locus_tag=F7O84_RS02820]	6666666.269962.peg.1954	2880	192.362	6.32794	197.828	197.835	177.568	196.962	188.172	195.807
locus_tag=F7O84_RS02815]	6666666.269962.peg.1955	5367	2.47448	0.591308	2.37322	4.01391	2.55167	2.63179	1.53109	1.74519
locus_tag=F7O84_RS02805]	6666666.269962.peg.1956	1800	250.051	53.698	322.079	291.197	297.971	190.528	219.815	178.716
locus_tag=F7O84_RS02800]	6666666.269962.peg.1957	1260	118.344	20.7357	153.915	128.879	134.447	98.201	103.369	91.255
locus_tag=F7O84_RS02795]	6666666.269962.peg.1958	582	25.5305	8.41566	26.8268	40.844	34.1677	23.2986	9.17749	18.8683
locus_tag=F7O84_RS02790]	6666666.269962.peg.1959	1473	121.051	46.8296	157.134	179.03	167.477	80.5487	61.6443	80.4713
locus_tag=F7O84_RS03410]	6666666.269962.peg.196	1746	4.73132	0.645675	5.09866	4.85022	2.90103	5.50107	5.41237	4.62459
locus_tag=F7O84_RS02785]	6666666.269962.peg.1960	633	142.569	30.4701	193.645	174.622	150.85	122.281	108.397	105.619
locus_tag=F7O84_RS02780]	6666666.269962.peg.1961	2304	159.883	26.2477	188.912	182.94	186.541	144.436	133.39	123.081
locus_tag=F7O84_RS02775]	6666666.269962.peg.1962	525	407.744	158.057	256.176	292.329	285.866	672.609	322.435	617.048
locus_tag=F7O84_RS02770]	6666666.269962.peg.1963	435	207.635	18.2456	227.948	195.702	232.451	193.526	217.241	178.939
locus_tag=F7O84_RS02765]	6666666.269962.peg.1964	1185	64.881	6.27285	56.8635	54.4129	64.5913	79.6233	64.8376	68.9572
locus_tag=F7O84_RS02760]	6666666.269962.peg.1965	1290	331.365	54.5964	392.613	396.762	368.51	270.671	269.454	290.182
locus_tag=F7O84_RS18720]	6666666.269962.peg.1966	156	17.8377	7.5404	14.9249	13.3332	26.4564	28.9739	2.63378	20.7039
locus_tag=F7O84_RS02755]	6666666.269962.peg.1967	438	289.08	48.3098	318.63	343.61	349.929	190.91	271.099	260.302
locus_tag=F7O84_RS02750]	6666666.269962.peg.1968	645	35.7651	9.06572	36.7344	54.1301	43.6279	28.0306	21.0212	31.0463
locus_tag=F7O84_RS02745]	6666666.269962.peg.1969	2385	144.315	19.0633	181.864	163.956	140.484	118.447	133.166	127.974
locus_tag=F7O84_RS03415]	6666666.269962.peg.197	1734	3.29402	0.596558	3.87021	3.76994	3.78662	1.95499	2.84339	3.53901
locus_tag=F7O84_RS02740]	6666666.269962.peg.1970	867	558.086	36.5471	513.711	541.672	528.395	538.925	643.553	582.26
locus_tag=F7O84_RS02735]	6666666.269962.peg.1971	264	10.4387	3.41907	8.81926	8.44147	7.81666	6.42036	14.0069	17.1278
locus_tag=F7O84_RS02730]	6666666.269962.peg.1972	273	10.7869	3.06958	7.02348	11.9727	17.1795	12.4174	9.03009	7.09849
locus_tag=F7O84_RS02725]	6666666.269962.peg.1973	531	8.8068	1.98353	6.70604	7.83419	7.7725	13.8322	6.96389	9.73202
locus_tag=F7O84_RS02720]	6666666.269962.peg.1974	459	11.3715	4.51457	10.145	14.8894	14.305	18.4638	2.68542	7.74029
locus_tag=F7O84_RS02715]	6666666.269962.peg.1975	303	34.825	7.86515	27.5724	34.3231	41.4825	50.3458	18.9841	36.2421
locus_tag=F7O84_RS02710]	6666666.269962.peg.1976	384	4.92664	3.69178	3.56661	7.73802	13.1906	1.47133	1.06997	2.52329
locus_tag=F7O84_RS02705]	6666666.269962.peg.1977	783	10.0121	3.83782	11.7193	16.318	11.9796	11.5452	3.14842	5.3624
locus_tag=F7O84_RS02700]	6666666.269962.peg.1978	1203	722.719	55.9399	792.602	820.654	710.946	686.162	613.401	712.546
locus_tag=F7O84_RS02695]	6666666.269962.peg.1979	801	237.863	46.5008	274.6	276.366	302.127	205.259	172.863	195.966
locus_tag=F7O84_RS03420]	6666666.269962.peg.198	2178	278.314	45.0733	239.33	243.592	216.799	304.546	341.448	324.168
locus_tag=F7O84_RS02690]	6666666.269962.peg.1980	2088	1150.13	147.189	1358.76	1326.1	1207.09	895.923	1059.64	1053.25
locus_tag=F7O84_RS02685]	6666666.269962.peg.1981	267	8373.21	1115.57	8261.07	7142.48	6663.66	10015.4	8078.89	10077.7
locus_tag=F7O84_RS02680]	6666666.269962.peg.1982	1251	503.799	94.8759	596.768	596.417	602.839	375.306	459.806	391.657
locus_tag=F7O84_RS02675]	6666666.269962.peg.1983	549	155.411	4.7599	155.668	152.9	150.695	153.34	150.428	169.433
locus_tag=F7O84_RS02670]	6666666.269962.peg.1984	1338	246.658	13.8023	259.79	274.932	244.525	232.246	227.544	240.908
locus_tag=F7O84_RS02665]	6666666.269962.peg.1985	1050	1.28069	0.279848	0.913053	1.27346	1.78667	1.61426	1.17391	0.922804
locus_tag=F7O84_RS02660]	6666666.269962.peg.1986	933	1.24279	0.461502	1.46793	1.43315	2.21179	1.21113	0.440374	0.69235
locus_tag=F7O84_RS02655]	6666666.269962.peg.1987	462	20.6266	15.1383	4.74313	8.68266	12.9939	48.917	10.6719	37.7511
locus_tag=F7O84_RS02650]	6666666.269962.peg.1988	594	2.88096	2.21023	0.922275	1.25059	1.89495	9.51165	2.0751	1.63122
locus_tag=F7O84_RS02645]	6666666.269962.peg.1989	1029	3.02643	0.96055	1.86337	2.16574	2.37007	4.94162	3.9929	2.82491
locus_tag=F7O84_RS03425]	6666666.269962.peg.199	642	74.6587	10.5427	68.2656	66.8796	70.423	99.4456	61.4384	81.5
locus_tag=F7O84_RS02640]	6666666.269962.peg.1990	960	1.67916	0.495268	1.28398	1.85712	1.75875	0.588533	2.56793	2.01863
locus_tag=F7O84_RS02635]	6666666.269962.peg.1991	1047	1.40661	0.503307	1.3081	1.41901	1.61261	2.69815	0.784851	0.616965
locus_tag=F7O84_RS02630]	6666666.269962.peg.1992	1221	0.275437	0.183625	0.336506	0.365037	0.614578	0	0.336502	0
locus_tag=F7O84_RS13230]	6666666.269962.peg.1993	213	49.8499	6.59096	41.7947	39.7581	53.7258	61.0085	48.2241	54.5884
locus_tag=F7O84_RS13235]	6666666.269962.peg.1994	1242	52.5939	5.40103	53.3717	55.0259	58.304	43.216	59.8771	45.7687
locus_tag=F7O84_RS13240]	6666666.269962.peg.1995	456	5.67674	2.58724	8.10935	10.1001	6.58245	4.95607	3.60412	0.708292
locus_tag=F7O84_RS13245]	6666666.269962.peg.1996	2595	48.4569	11.241	36.4165	46.8897	50.2435	77.9449	28.3413	50.9053
locus_tag=F7O84_RS13250]	6666666.269962.peg.1997	3207	11.1646	3.97684	11.1462	13.6664	18.1926	13.5654	3.97161	6.44553
locus_tag=F7O84_RS13255]	6666666.269962.peg.1998	1032	50.8212	3.91604	55.3405	47.9397	56.7162	47.0827	52.1549	45.6931
locus_tag=F7O84_RS07035]	6666666.269962.peg.1999	120	11.4515	6.3556	15.9784	9.90466	20.3233	0	17.1196	5.38302
locus_tag=F7O84_RS12570]	6666666.269962.peg.2	918	3.54203	0.71117	2.98383	2.75129	3.67843	5.53914	3.13299	3.16648
locus_tag=F7O84_RS14715]	6666666.269962.peg.20	1719	7.63163	0.983899	7.72828	6.30925	6.00232	9.20289	8.84361	7.70345
locus_tag=F7O84_RS03430]	6666666.269962.peg.200	2436	21.9955	2.96488	22.7701	24.6397	24.3356	15.0757	25.1312	20.0206
locus_tag=F7O84_RS13260]	6666666.269962.peg.2000	381	1.37425	1.20274	0.718939	1.16984	0	2.96584	0	3.39088
locus_tag=F7O84_RS13265]	6666666.269962.peg.2001	969	2.6833	1.24348	1.27205	1.68655	2.51682	6.41374	2.54408	1.66657
locus_tag=F7O84_RS13270]	6666666.269962.peg.2002	375	1.34877	1.26778	0.730442	1.98093	0	4.51993	0	0.861284
locus_tag=F7O84_RS13275]	6666666.269962.peg.2003	1077	1.9178	0.42299	2.16182	1.51743	2.09025	1.0492	2.28897	2.39912
locus_tag=F7O84_RS13280]	6666666.269962.peg.2004	195	1.77454	1.52058	2.80939	0.761897	0	0	2.10702	4.96894
locus_tag=F7O84_RS13285]	6666666.269962.peg.2005	540	28.6828	1.8903	30.1815	26.9627	27.0978	30.3422	31.1956	26.317
locus_tag=F7O84_RS13290]	6666666.269962.peg.2006	900	5.84544	4.28266	6.69572	11.3904	12.2982	1.88331	1.36956	1.43547
locus_tag=F7O84_RS13295]	6666666.269962.peg.2007	921	3.82324	2.6228	5.50211	5.48467	8.35135	2.45382	0.446112	0.701371
locus_tag=F7O84_RS13300]	6666666.269962.peg.2008	1542	1156.24	223.737	1487.62	1229.99	1422.33	853.35	1083.93	860.236
locus_tag=F7O84_RS13305]	6666666.269962.peg.2009	1344	129.91	30.4287	97.6232	100.041	100.779	149.235	191.678	140.103
locus_tag=F7O84_RS03435]	6666666.269962.peg.201	1020	18.1365	3.18294	16.6498	13.9831	15.2655	23.2644	22.5575	17.099
locus_tag=F7O84_RS13310]	6666666.269962.peg.2010	1188	99.2607	18.563	73.3209	74.5351	96.1686	133.163	121.047	97.3294
locus_tag=F7O84_RS13315]	6666666.269962.peg.2011	267	3.46811	2.06432	1.53885	0.556442	3.51311	2.11607	4.61651	8.46768
locus_tag=F7O84_RS13320]	6666666.269962.peg.2012	1098	511.746	22.4763	526.003	564.917	490.869	496.555	496.186	495.944
locus_tag=F7O84_RS13325]	6666666.269962.peg.2013	1119	43.6462	5.10326	49.4468	52.7098	44.0918	38.373	40.0221	37.2338
locus_tag=F7O84_RS13330]	6666666.269962.peg.2014	1158	22.3745	2.53727	23.7725	26.4295	23.9765	22.9314	18.4501	18.6872
locus_tag=F7O84_RS13335]	6666666.269962.peg.2015	1473	19.4905	4.14221	18.5028	13.5155	15.6652	26.8496	17.8518	24.558
locus_tag=F7O84_RS13340]	6666666.269962.peg.2016	174	3.52518	1.6428	5.5098	1.7077	6.46896	3.24708	2.36132	1.85621
locus_tag=F7O84_RS13340]	6666666.269962.peg.2017	117	0	0	0	0	0	0	0	0
locus_tag=F7O84_RS13345]	6666666.269962.peg.2018	1470	4.78324	1.64447	3.35407	3.13311	3.31809	8.07131	6.42857	4.3943
locus_tag=F7O84_RS13350]	6666666.269962.peg.2019	990	3.52925	1.11598	2.07512	2.70127	2.46343	4.56559	4.15019	5.2199
locus_tag=F7O84_RS03440]	6666666.269962.peg.202	1413	87.9664	14.9406	77.3478	63.9282	77.8015	102.762	109.042	96.9173
locus_tag=F7O84_RS13355]	6666666.269962.peg.2020	1644	7.27573	1.07569	8.58069	6.32597	8.33016	7.56072	4.99841	7.85843
locus_tag=F7O84_RS13360]	6666666.269962.peg.2021	897	5.89009	1.66325	7.02348	8.94401	6.69252	3.77921	4.58048	4.32082
locus_tag=F7O84_RS13365]	6666666.269962.peg.2022	936	2.74144	1.28406	4.09703	5.23804	2.60555	1.81087	1.31689	1.38026
locus_tag=F7O84_RS13370]	6666666.269962.peg.2023	1056	122.524	11.0009	117.244	138.581	116.895	115.567	107.386	139.469
locus_tag=F7O84_RS13375]	6666666.269962.peg.2024	642	83.6089	2.16377	87.0387	85.1616	79.4816	81.8446	85.1178	83.0092
locus_tag=F7O84_RS13380]	6666666.269962.peg.2025	1560	2256.34	284.334	1972.02	1915.89	2028.12	2391.07	2787.06	2443.89
locus_tag=F7O84_RS13385]	6666666.269962.peg.2026	780	112.491	18.1109	131.164	130.284	130.358	89.0949	92.1822	101.863
locus_tag=F7O84_RS13390]	6666666.269962.peg.2027	654	58.1005	6.34584	76.8556	58.383	57.6568	56.1536	52.144	47.4101
locus_tag=F7O84_RS13395]	6666666.269962.peg.2028	1386	41.4293	5.80535	43.7751	49.2017	48.7272	34.6496	35.8695	36.3529
locus_tag=F7O84_RS13400]	6666666.269962.peg.2029	975	733.648	90.5487	663.157	645.022	928.186	738.256	806.147	621.118
locus_tag=F7O84_RS00750]	6666666.269962.peg.203	123	2.58011	2.58011	3.34044	6.03943	6.10081	0	0	0
locus_tag=F7O84_RS13405]	6666666.269962.peg.2030	3483	260.544	25.0471	294.599	272.527	273.563	223.856	276.626	222.09
locus_tag=F7O84_RS13410]	6666666.269962.peg.2031	1380	130.487	11.8508	128.522	124.239	105.899	127.737	147.675	148.852
locus_tag=F7O84_RS13415]	6666666.269962.peg.2032	1074	164.489	32.3059	195.873	213.725	180.788	132.568	117.828	146.154
locus_tag=F7O84_RS13420]	6666666.269962.peg.2033	981	184.157	14.8999	188.335	187.038	164.461	186.027	159.154	219.93
locus_tag=F7O84_RS13425]	6666666.269962.peg.2034	1188	616.803	85.6993	772.867	717.838	604.33	533.603	511.857	560.324
locus_tag=F7O84_RS13430]	6666666.269962.peg.2035	462	277.674	13.923	298.817	260.801	267.594	292.279	283.695	262.859
locus_tag=F7O84_RS13435]	6666666.269962.peg.2036	1134	31.2274	9.11751	33.3337	43.3656	43.1777	32.3849	16.3043	18.7979
locus_tag=F7O84_RS13440]	6666666.269962.peg.2037	1818	427.803	22.4013	393.095	447.998	445.472	395.308	431.209	453.737
locus_tag=F7O84_RS13445]	6666666.269962.peg.2038	2157	180.257	42.5693	223.311	223.303	221.867	133.324	159.052	120.688
locus_tag=F7O84_RS13450]	6666666.269962.peg.2039	510	117.254	8.44374	126.753	117.982	111.824	107.459	107.148	132.359
locus_tag=F7O84_RS03445]	6666666.269962.peg.204	1005	28.6015	5.16753	22.8945	31.0445	30.4266	38.2283	18.806	30.2092
locus_tag=F7O84_RS13455]	6666666.269962.peg.2040	1167	989.55	306.747	1274.17	1325.8	1288.93	608.564	723.862	715.984
locus_tag=F7O84_RS13460]	6666666.269962.peg.2041	486	544.956	42.488	592.921	516.326	468.614	585.917	522.463	583.493
locus_tag=F7O84_RS13465]	6666666.269962.peg.2042	990	913.034	63.0486	917.064	753.054	887.594	1093.46	909.308	917.724
locus_tag=F7O84_RS13470]	6666666.269962.peg.2043	1521	412.239	25.9445	453.285	440.923	420.342	390.405	381.155	387.323
locus_tag=F7O84_RS13475]	6666666.269962.peg.2044	603	62.423	20.1804	59.0531	81.0605	88.0444	78.7053	18.3971	49.2774
locus_tag=F7O84_RS13480]	6666666.269962.peg.2045	711	57.5849	10.6442	63.1817	70.0013	71.5043	54.0358	40.4513	46.3349
locus_tag=F7O84_RS13485]	6666666.269962.peg.2046	660	36.8356	10.5254	25.7315	29.0387	24.1606	64.2036	39.2193	38.6599
locus_tag=F7O84_RS13490]	6666666.269962.peg.2047	1737	28.2525	3.65324	27.5966	32.4168	26.5685	31.8763	19.6328	31.4242
locus_tag=F7O84_RS13495]	6666666.269962.peg.2048	918	380.531	42.0714	383.422	420.301	460.417	320.654	314.194	384.2
locus_tag=F7O84_RS13500]	6666666.269962.peg.2049	927	5.38515	0.997941	5.31875	7.69294	6.07119	4.26639	4.43225	4.5294
locus_tag=F7O84_RS03450]	6666666.269962.peg.205	909	38.6147	3.60885	37.5165	41.678	34.0528	41.6441	33.4481	43.3484
locus_tag=F7O84_RS13505]	6666666.269962.peg.2050	876	1.81906	0.742965	2.8142	3.05281	1.71324	1.28994	0.938058	1.1061
locus_tag=F7O84_RS13510]	6666666.269962.peg.2051	1401	44.581	2.14844	44.284	42.8424	40.1713	46.7802	45.4566	47.9515
locus_tag=F7O84_RS13515]	6666666.269962.peg.2052	438	31.2786	6.67173	29.3928	24.7617	26.5552	41.2779	24.3895	41.2944
locus_tag=F7O84_RS13520]	6666666.269962.peg.2053	198	45.6881	13.1242	59.4868	57.0268	31.2666	59.9234	20.751	45.6741
locus_tag=F7O84_RS13525]	6666666.269962.peg.2054	1818	7.12756	1.50117	9.11546	9.64315	7.01694	4.0401	6.55402	6.39567
locus_tag=F7O84_RS13530]	6666666.269962.peg.2055	1557	13.581	3.27787	17.0648	17.3666	16.1454	9.43467	9.23598	12.2389
locus_tag=F7O84_RS13535]	6666666.269962.peg.2056	1482	165.852	50.0092	221.424	214.634	211.525	110.177	126.421	110.929
locus_tag=F7O84_RS13540]	6666666.269962.peg.2057	1791	72.9338	27.0138	93.1405	95.1478	111.554	43.5337	49.3227	44.9036
locus_tag=F7O84_RS13545]	6666666.269962.peg.2058	915	0.894172	0.453821	1.19745	1.94846	0.615081	0	0.898075	0.70597
locus_tag=F7O84_RS13550]	6666666.269962.peg.2059	948	0.45228	0.248137	0.433411	0.626877	0.19789	0	0.433406	1.02209
locus_tag=F7O84_RS03455]	6666666.269962.peg.206	1005	13.8171	5.85809	9.81191	8.27852	5.78666	22.4872	22.0766	14.4619
locus_tag=F7O84_RS13555]	6666666.269962.peg.2060	663	0.815532	0.323211	0.619719	0.896349	0.565912	1.70435	0.619712	0.487151
locus_tag=F7O84_RS13560]	6666666.269962.peg.2061	660	19.8961	10.2613	7.47043	8.10381	13.9279	36.8101	19.2984	33.7662
locus_tag=F7O84_RS13565]	6666666.269962.peg.2062	477	32.3799	21.468	12.9206	8.40962	11.4054	72.2526	53.4044	35.8868
locus_tag=F7O84_RS13570]	6666666.269962.peg.2063	1203	23.382	14.1241	7.62775	9.38596	10.7601	40.3901	40.9845	31.1437
locus_tag=F7O84_RS13575]	6666666.269962.peg.2064	648	45.4725	23.3043	25.7853	21.3225	19.3969	73.2397	72.2826	60.8082
locus_tag=F7O84_RS13580]	6666666.269962.peg.2065	1104	87.7571	31.3133	54.7087	57.8669	56.7557	108.495	128.769	119.948
locus_tag=F7O84_RS13585]	6666666.269962.peg.2066	1137	140.586	11.525	144.426	123.482	126.057	137.645	151.411	160.496
locus_tag=F7O84_RS13590]	6666666.269962.peg.2067	1479	36.6489	5.74385	32.5958	32.8481	27.2711	44.3131	40.2813	42.5837
locus_tag=F7O84_RS13595]	6666666.269962.peg.2068	426	145.486	41.5727	164.607	185.189	211.38	102.123	108.022	101.595
locus_tag=F7O84_RS13615]	6666666.269962.peg.2069	1341	5.33872	3.02202	7.55771	7.31217	10.2124	2.52793	1.53195	2.89021
locus_tag=F7O84_RS03460]	6666666.269962.peg.207	1434	14.739	4.24611	9.74177	10.8785	10.8583	22.8518	18.3373	15.7662
locus_tag=F7O84_RS13620]	6666666.269962.peg.2070	501	4.40926	3.17379	4.64727	9.4895	8.61237	1.12773	0	2.57869
locus_tag=F7O84_RS13635]	6666666.269962.peg.2071	2091	77.3123	4.18456	72.7036	71.8337	79.1311	74.8459	87.0469	78.3126
locus_tag=F7O84_RS13640]	6666666.269962.peg.2072	336	75.1129	34.1821	82.3378	121.597	123.95	57.1718	14.6739	50.9465
locus_tag=F7O84_RS13645]	6666666.269962.peg.2073	1584	105.337	43.3578	128.744	153.072	164.268	60.9934	61.7341	63.2097
locus_tag=F7O84_RS13650]	6666666.269962.peg.2074	2007	33.7801	4.95266	31.1857	31.8311	28.7896	42.5081	28.4558	39.91
locus_tag=F7O84_RS13655]	6666666.269962.peg.2075	852	17.1284	3.26149	17.2001	14.4734	23.1197	14.589	12.5383	20.8497
locus_tag=F7O84_RS13660]	6666666.269962.peg.2076	918	23.7246	6.81284	14.77	17.4788	22.0706	39.3894	20.1407	28.4984
locus_tag=F7O84_RS13665]	6666666.269962.peg.2077	1383	247.146	19.1652	207.764	229.032	247.556	281.066	258.464	258.992
locus_tag=F7O84_RS13670]	6666666.269962.peg.2078	1536	24.8737	7.43568	17.1197	20.0221	20.5187	43.0365	19.527	29.0179
locus_tag=F7O84_RS13675]	6666666.269962.peg.2079	1749	20.0173	2.50392	18.402	21.2364	21.1305	25.1969	17.1489	16.9893
locus_tag=F7O84_RS03465]	6666666.269962.peg.208	264	4.20596	2.65068	1.55634	1.68829	1.42121	8.56048	4.66897	7.34049
locus_tag=F7O84_RS13680]	6666666.269962.peg.2080	2526	97.1702	16.1793	89.2449	78.0492	75.6786	119.887	111.094	109.067
locus_tag=F7O84_RS13685]	6666666.269962.peg.2081	1182	63.767	9.0667	68.5948	76.4217	73.4845	55.4476	53.1836	55.4697
locus_tag=F7O84_RS13690]	6666666.269962.peg.2082	504	51.3719	12.6262	39.1308	33.8999	52.4833	77.3501	43.2065	62.1611
locus_tag=F7O84_RS13695]	6666666.269962.peg.2083	753	75.1289	6.40754	79.8466	77.1459	62.2841	79.534	68.751	83.2117
locus_tag=F7O84_RS13700]	6666666.269962.peg.2084	327	274.728	72.5269	355.588	358.022	328.156	190.058	183.446	233.1
locus_tag=F7O84_RS13710]	6666666.269962.peg.2085	408	4491.9	337.439	4449.12	4589.64	4774.6	3707.07	5123.78	4307.21
locus_tag=F7O84_RS13715]	6666666.269962.peg.2086	1392	2543.8	371.706	2721.15	2913.12	3112.24	1965.7	2430.09	2120.49
locus_tag=F7O84_RS13720]	6666666.269962.peg.2087	861	1210.06	142.912	1179.65	1069.84	951.944	1236.29	1440.67	1381.96
locus_tag=F7O84_RS13725]	6666666.269962.peg.2088	1506	1508.12	133.565	1662.14	1494.48	1424.81	1344.2	1754.79	1368.27
locus_tag=F7O84_RS13730]	6666666.269962.peg.2089	549	584.818	161.807	513.155	382.385	373.491	831.536	706.486	701.852
locus_tag=F7O84_RS03470]	6666666.269962.peg.209	1041	24.1573	8.81117	16.0508	14.1291	15.8586	36.3635	37.1006	25.4414
locus_tag=F7O84_RS13735]	6666666.269962.peg.2090	516	1233.26	389.703	977.55	768.187	784.938	1719.06	1610.03	1539.79
locus_tag=F7O84_RS13740]	6666666.269962.peg.2091	267	1751.46	333.794	1552.7	1899.69	2604.62	1398.73	1695.8	1357.25
locus_tag=F7O84_RS13745]	6666666.269962.peg.2092	744	479.775	92.293	359.883	444.512	463.957	641.691	373.869	594.737
locus_tag=F7O84_RS13750]	6666666.269962.peg.2093	387	85.161	14.4981	89.5358	103.27	103.737	87.5956	58.3923	68.4353
locus_tag=F7O84_RS13755]	6666666.269962.peg.2094	219	51.8844	27.7536	14.3837	23.744	34.2648	98.0351	65.664	75.2148
locus_tag=F7O84_RS13760]	6666666.269962.peg.2095	855	10.4075	2.70169	11.0527	5.90804	6.80187	12.5554	14.4165	11.7104
locus_tag=F7O84_RS13765]	6666666.269962.peg.2096	945	30.03	2.08821	33.6235	32.7011	29.1822	28.698	30	25.9752
locus_tag=F7O84_RS13770]	6666666.269962.peg.2097	528	5.61047	3.0656	4.40963	7.87871	10.6591	7.49042	0.778162	2.44683
locus_tag=F7O84_RS13775]	6666666.269962.peg.2098	1188	456.579	48.9193	471.167	514.742	530.585	370.479	429.199	423.301
locus_tag=F7O84_RS13780]	6666666.269962.peg.2099	1068	620.28	54.4572	607.59	675.381	715.268	569.753	520.127	633.564
locus_tag=F7O84_RS14710]	6666666.269962.peg.21	579	2.93517	0.521943	1.89234	2.56597	3.88808	2.92742	3.54809	2.78913
locus_tag=F7O84_RS03475]	6666666.269962.peg.210	1419	49.5576	8.32382	37.1591	42.6131	61.4756	57.7335	54.4351	43.9291
locus_tag=F7O84_RS13785]	6666666.269962.peg.2100	1293	509.035	48.9932	518.173	428.359	461.673	519.111	636.8	490.092
locus_tag=F7O84_RS13790]	6666666.269962.peg.2101	1551	612.835	138.25	642.669	760.762	849.824	417.096	504.381	502.277
locus_tag=F7O84_RS13795]	6666666.269962.peg.2102	516	60.6566	12.0761	47.2452	48.0837	54.5348	93.0704	56.5343	64.4711
locus_tag=F7O84_RS13800]	6666666.269962.peg.2103	1212	211.045	69.2994	253.688	298.979	288.365	115.609	163.06	146.567
locus_tag=F7O84_RS13805]	6666666.269962.peg.2104	588	9.57553	3.58936	10.9473	16.4235	12.1238	6.72609	6.28882	4.94359
locus_tag=F7O84_RS17975]	6666666.269962.peg.2105	993	468.792	27.402	500.524	454.687	483.263	442.093	504.794	427.389
locus_tag=F7O84_RS17980]	6666666.269962.peg.2106	774	732.402	36.2587	678.242	716.168	824.567	721.204	749.014	705.218
locus_tag=F7O84_RS17985]	6666666.269962.peg.2107	813	2261.47	162.154	2501.97	2432.49	2275.2	1969.48	2322.7	2067
locus_tag=F7O84_RS17990]	6666666.269962.peg.2108	333	995.031	256.829	801.594	721.88	738.569	1386.18	947.59	1374.37
locus_tag=F7O84_RS17995]	6666666.269962.peg.2109	2217	38.4272	4.10719	34.78	33.1719	36.5553	47.6561	36.88	41.5199
locus_tag=F7O84_RS03480]	6666666.269962.peg.211	1191	69.8493	11.6034	59.1069	60.5008	55.1301	73.5296	88.6595	82.1691
locus_tag=F7O84_RS18000]	6666666.269962.peg.2110	738	8.11615	2.19012	7.23761	6.64337	9.15121	13.0147	3.89713	8.75288
locus_tag=F7O84_RS18005]	6666666.269962.peg.2111	417	331.992	153.193	211.841	175.647	148.91	552.798	436.487	466.27
locus_tag=F7O84_RS18010]	6666666.269962.peg.2112	456	36.7954	17.364	33.6388	58.646	62.9447	40.8876	12.6144	12.041
locus_tag=F7O84_RS18015]	6666666.269962.peg.2113	1002	40.9331	18.7717	49.3431	67.6127	62.1588	37.215	10.2512	19.0179
locus_tag=F7O84_RS18020]	6666666.269962.peg.2114	882	179.365	6.40724	197.673	174.342	175.901	175.519	180.279	172.476
locus_tag=F7O84_RS18025]	6666666.269962.peg.2115	1275	74.1209	5.56585	73.1516	70.3814	71.8029	86.4105	64.4501	78.5288
locus_tag=F7O84_RS18030]	6666666.269962.peg.2116	1350	121.705	9.78905	133.61	122.047	138.824	120.113	117.783	97.8514
locus_tag=F7O84_RS18035]	6666666.269962.peg.2117	264	45.169	15.449	30.608	25.3244	34.8197	79.1845	43.577	57.5005
locus_tag=F7O84_RS18040]	6666666.269962.peg.2118	1659	204.503	21.321	180.216	174.72	194.611	237.031	230.572	209.87
locus_tag=F7O84_RS18045]	6666666.269962.peg.2119	657	163.813	15.5615	163.849	151.962	153.335	197.79	139.458	176.484
locus_tag=F7O84_RS11290]	6666666.269962.peg.212	1290	67.7453	24.8412	79.5205	97.8949	100.344	41.1699	41.7239	45.8183
locus_tag=F7O84_RS18050]	6666666.269962.peg.2120	2049	306.524	22.6175	361.545	302.215	266.796	284.84	304.392	319.356
locus_tag=F7O84_RS18055]	6666666.269962.peg.2121	1527	33.6931	4.12797	34.4413	37.2641	39.1908	36.2601	21.7946	33.2076
locus_tag=F7O84_RS18060]	6666666.269962.peg.2122	543	97.9591	2.89087	100.638	98.2258	101.573	99.8881	89.2865	98.1435
locus_tag=F7O84_RS18065]	6666666.269962.peg.2123	1041	48.9375	7.75153	41.9688	44.1	45.7736	68.3852	40.6528	52.7443
locus_tag=F7O84_RS18070]	6666666.269962.peg.2124	1008	76.9853	5.943	73.7779	68.5367	80.0277	89.6812	79.076	70.8124
locus_tag=F7O84_RS18075]	6666666.269962.peg.2125	1056	216.477	5.06638	214.386	219.338	228.815	214.012	211.271	211.039
locus_tag=F7O84_RS18080]	6666666.269962.peg.2126	777	79.8296	14.6244	72.9737	92.7367	95.3693	95.256	42.8319	79.8101
locus_tag=F7O84_RS18085]	6666666.269962.peg.2127	3018	146.316	5.8322	143.674	137.691	157.763	147.894	140.088	150.789
locus_tag=F7O84_RS18090]	6666666.269962.peg.2128	1206	60.2244	4.18731	55.192	66.2775	66.7333	57.6235	59.2797	56.2405
locus_tag=F7O84_RS18095]	6666666.269962.peg.2129	744	90.1871	8.19774	75.1059	80.6751	103.634	91.8871	93.8814	95.9394
locus_tag=F7O84_RS11295]	6666666.269962.peg.213	675	31.9639	3.90678	30.638	28.1733	34.1849	39.3402	34.0869	25.36
locus_tag=F7O84_RS07525]	6666666.269962.peg.2130	114	49.2977	24.0218	32.4374	28.6714	27.9754	94.1653	36.0412	76.4956
locus_tag=F7O84_RS18100]	6666666.269962.peg.2131	687	100.309	11.4671	85.9226	99.0466	96.9402	118.426	84.925	116.593
locus_tag=F7O84_RS18105]	6666666.269962.peg.2132	402	33.2176	12.6997	28.6181	46.5667	43.4	47.7854	11.2427	21.6928
locus_tag=F7O84_RS18110]	6666666.269962.peg.2133	1191	26.6072	10.6797	31.2784	37.4232	43.159	16.6035	15.1791	15.9999
locus_tag=F7O84_RS18115]	6666666.269962.peg.2134	1221	115.651	15.4479	118.787	135.429	138.126	116.608	79.4145	105.544
locus_tag=F7O84_RS18120]	6666666.269962.peg.2135	1146	67.6159	15.0344	74.2154	82.0635	91.6718	60.1475	41.2303	56.3667
locus_tag=F7O84_RS18125]	6666666.269962.peg.2136	1098	39.7605	8.45272	36.1728	45.8699	50.9151	47.8545	22.4519	35.2985
locus_tag=F7O84_RS18130]	6666666.269962.peg.2137	1812	25.6363	5.928	19.0471	21.8099	22.3629	34.2986	21.5412	34.7579
locus_tag=F7O84_RS18135]	6666666.269962.peg.2138	375	879.742	304.154	993.036	1103.38	1455.27	569.512	650.817	506.435
locus_tag=F7O84_RS18140]	6666666.269962.peg.2139	234	1307.61	187.132	1373.09	1084.43	1277.92	1666	999.08	1445.13
locus_tag=F7O84_RS11300]	6666666.269962.peg.214	480	6.98237	2.1067	8.55987	5.57137	11.725	5.88533	3.42391	6.72878
locus_tag=F7O84_RS18145]	6666666.269962.peg.2140	1020	140.174	33.1049	108.761	125.847	103.916	194.424	122.858	185.239
locus_tag=F7O84_RS18150]	6666666.269962.peg.2141	192	357.036	153.429	218.99	241.426	278.469	585.591	228.974	588.768
locus_tag=F7O84_RS18155]	6666666.269962.peg.2142	672	119.117	12.1955	128.194	122.261	143.212	119.388	84.3749	117.273
locus_tag=F7O84_RS18160]	6666666.269962.peg.2143	858	162.137	15.113	146.695	156.189	175.356	194.257	147.492	152.833
locus_tag=F7O84_RS18165]	6666666.269962.peg.2144	1086	204.335	5.90528	206.32	196.452	196.583	220.066	203.165	203.425
locus_tag=F7O84_RS18170]	6666666.269962.peg.2145	687	256.611	36.2338	275.511	221.017	183.504	306.757	263.746	289.132
locus_tag=F7O84_RS18175]	6666666.269962.peg.2146	909	174.639	19.3387	186.679	198.747	192.14	179.007	132.436	158.826
locus_tag=F7O84_RS18180]	6666666.269962.peg.2147	1269	382.744	32.9548	357.342	361.766	330.259	422.52	406.66	417.916
locus_tag=F7O84_RS18185]	6666666.269962.peg.2148	1248	531.364	60.876	640.783	536.423	450.21	463.583	599.514	497.671
locus_tag=F7O84_RS18190]	6666666.269962.peg.2149	903	353.305	36.9468	356.424	373.481	440.849	297.199	350.354	301.521
locus_tag=F7O84_RS11305]	6666666.269962.peg.215	798	41.0607	3.50764	42.5634	45.2412	37.614	33.9845	43.2494	43.7118
locus_tag=F7O84_RS18195]	6666666.269962.peg.2150	1554	42.1775	14.9573	55.9641	58.7014	56.7387	26.5408	29.3478	25.772
locus_tag=F7O84_RS18200]	6666666.269962.peg.2151	303	174.409	12.3258	160.01	167.693	163.453	193.925	169.501	191.87
locus_tag=F7O84_RS18205]	6666666.269962.peg.2152	318	1688.9	457.141	2276.6	2148.66	2012.86	1106.89	1312.71	1275.67
locus_tag=F7O84_RS18210]	6666666.269962.peg.2153	681	1848.33	260.989	2210.23	2086.09	2031.64	1579.65	1636.24	1546.14
locus_tag=F7O84_RS18215]	6666666.269962.peg.2154	621	1207.27	526.788	1607.33	1594.08	2000.76	605.023	801.89	634.521
locus_tag=F7O84_RS18220]	6666666.269962.peg.2155	300	1233.78	66.2143	1150.9	1232.14	1175.63	1348.45	1177.83	1317.76
locus_tag=F7O84_RS18225]	6666666.269962.peg.2156	849	1726.89	417.337	2115.35	2076.3	2241.03	1199.19	1466.84	1262.63
locus_tag=F7O84_RS18230]	6666666.269962.peg.2157	282	1234.08	85.99	1451.17	1274.96	1196.78	1146.01	1216.58	1118.98
locus_tag=F7O84_RS18235]	6666666.269962.peg.2158	390	644.762	74.6473	716.395	688.374	685.461	712.759	533.077	532.505
locus_tag=F7O84_RS18240]	6666666.269962.peg.2159	657	981.161	217.239	1236.58	1151.93	1206.69	824.699	742.942	724.127
locus_tag=F7O84_RS11310]	6666666.269962.peg.216	1167	6.2557	1.84587	7.39361	6.11084	8.68071	8.23039	3.52073	3.59791
locus_tag=F7O84_RS18245]	6666666.269962.peg.2160	438	1449.01	179.303	1856.12	1448.05	1521.36	1132.56	1507.46	1228.51
locus_tag=F7O84_RS18250]	6666666.269962.peg.2161	201	408.907	40.1307	395.202	384.36	367.733	517.206	367.943	421.001
locus_tag=F7O84_RS18255]	6666666.269962.peg.2162	255	200.355	53.2994	163.812	195.18	226.591	327.917	82.1739	206.455
locus_tag=F7O84_RS18260]	6666666.269962.peg.2163	369	1139.53	138.94	1385.17	1200.24	1247.11	955.433	1142.42	906.799
locus_tag=F7O84_RS18265]	6666666.269962.peg.2164	312	593.697	38.6781	565.829	512.376	586.851	664.59	603.135	629.4
locus_tag=F7O84_RS18270]	6666666.269962.peg.2165	540	1706.76	134.214	2109.4	1699.47	1542.49	1568.38	1700.54	1620.29
locus_tag=F7O84_RS18275]	6666666.269962.peg.2166	186	896.753	59.7065	1022.77	872.249	872.44	814.074	949.859	849.128
locus_tag=F7O84_RS18280]	6666666.269962.peg.2167	402	854.843	136.004	1184.58	930.225	857.733	718.186	691.937	746.392
locus_tag=F7O84_RS18285]	6666666.269962.peg.2168	540	1746.02	529.684	1955.71	2250.56	2620.84	1284.83	1151.19	1212.97
locus_tag=F7O84_RS18290]	6666666.269962.peg.2169	369	1782.6	87.734	2015.77	1812.63	1674.16	1754.69	1711.4	1726.94
locus_tag=F7O84_RS11315]	6666666.269962.peg.217	1077	192.839	21.4219	222.413	196.714	223.657	173.642	190.366	150.245
locus_tag=F7O84_RS18295]	6666666.269962.peg.2170	510	2427.39	978.686	3241.87	3295.34	3681	1276.22	1665.23	1404.65
locus_tag=F7O84_RS18300]	6666666.269962.peg.2171	183	1542.58	407.463	2050.63	1821	1978.51	969.44	1338.13	1097.78
locus_tag=F7O84_RS18305]	6666666.269962.peg.2172	441	2687.66	1057.13	2848.16	3523.9	4862.28	1602.73	1679.81	1609.05
locus_tag=F7O84_RS18310]	6666666.269962.peg.2173	1317	1441.46	267.204	1656.7	1726.77	1742.53	1181.03	998.316	1343.43
locus_tag=F7O84_RS18315]	6666666.269962.peg.2174	645	1280.71	494.12	1632.67	1741.38	1950.46	801.5	847.219	711.06
locus_tag=F7O84_RS18320]	6666666.269962.peg.2175	759	1446.04	567.54	1986.52	2067.26	1986.98	803.197	970.604	861.709
locus_tag=F7O84_RS18325]	6666666.269962.peg.2176	282	1141.1	176.346	1415.72	1306.57	1230.04	905.59	928.098	1060.57
locus_tag=F7O84_RS18330]	6666666.269962.peg.2177	219	431.024	78.0567	383.982	506.766	454.009	531.454	243.895	466.037
locus_tag=F7O84_RS18340]	6666666.269962.peg.2178	369	2937.16	674.004	4065.31	3615.6	3152.59	2042.55	2292.63	2454.31
locus_tag=F7O84_RS18345]	6666666.269962.peg.2179	396	5570.53	2122.83	6772.15	8093.31	8214.6	3331.45	3697.82	3313.82
locus_tag=F7O84_RS11320]	6666666.269962.peg.218	828	150.066	10.3766	143.905	141.034	134.129	156.26	159.286	165.781
locus_tag=F7O84_RS18350]	6666666.269962.peg.2180	594	2032.19	480.813	2558.16	2594.47	2386.37	1694.98	1187.65	1771.5
locus_tag=F7O84_RS18355]	6666666.269962.peg.2181	960	2924.44	454.678	3572.6	3361.08	3203.66	2280.57	2522.99	2605.72
locus_tag=F7O84_RS18360]	6666666.269962.peg.2182	534	2470.54	245.681	2819.18	2660.35	2340.43	2431.37	1902.77	2669.13
locus_tag=F7O84_RS18365]	6666666.269962.peg.2183	861	19.5605	4.23857	14.9524	21.2243	21.3528	26.2482	11.4528	22.1323
locus_tag=F7O84_RS18370]	6666666.269962.peg.2184	828	637.291	78.4089	778.41	717.191	638.247	480.38	650.543	558.976
locus_tag=F7O84_RS18375]	6666666.269962.peg.2185	804	668.948	30.7345	632.153	697.761	671.766	654.941	627.547	729.52
locus_tag=F7O84_RS18380]	6666666.269962.peg.2186	2637	63.8185	13.2802	77.5939	77.5809	76.1213	54.4209	46.1196	51.0744
locus_tag=F7O84_RS18385]	6666666.269962.peg.2187	606	191.792	53.1573	247.247	253.255	234.345	138.917	128.82	148.166
locus_tag=F7O84_RS18390]	6666666.269962.peg.2188	300	562.064	85.4796	761.029	619.537	499.016	474.593	542.347	475.859
locus_tag=F7O84_RS18395]	6666666.269962.peg.2189	1797	21.9982	1.83442	19.2823	22.7361	21.4012	19.8077	23.7787	24.983
locus_tag=F7O84_RS11325]	6666666.269962.peg.219	954	83.7376	13.8715	100.063	99.3581	93.4066	76.3983	76.6611	56.5387
locus_tag=F7O84_RS18400]	6666666.269962.peg.2190	1602	5.89526	0.992858	4.70205	6.58456	7.02621	7.05358	4.36004	5.64512
locus_tag=F7O84_RS18405]	6666666.269962.peg.2191	1791	7.99627	1.02577	7.4176	7.29992	9.53187	8.51747	6.19401	9.01679
locus_tag=F7O84_RS18410]	6666666.269962.peg.2192	1359	127.045	7.30439	114.887	122.442	121.892	136.779	131.514	134.754
locus_tag=F7O84_RS18415]	6666666.269962.peg.2193	912	11.7768	5.16244	17.1197	15.8018	17.896	6.19509	5.85669	7.79122
locus_tag=F7O84_RS18420]	6666666.269962.peg.2194	834	3.50856	2.50545	5.91185	6.05681	6.07338	1.3549	0.492649	1.1618
locus_tag=F7O84_RS18425]	6666666.269962.peg.2195	1161	12.8958	1.61977	10.145	11.517	15.8353	12.1661	13.8018	13.9096
locus_tag=F7O84_RS18430]	6666666.269962.peg.2196	1728	96.5021	6.23124	91.4638	89.761	99.8795	89.5878	105.333	102.988
locus_tag=F7O84_RS18435]	6666666.269962.peg.2197	375	13.0238	1.89733	12.4175	15.0551	10.0053	15.0664	10.9565	14.6418
locus_tag=F7O84_RS18440]	6666666.269962.peg.2198	1290	27.3319	1.87135	27.0731	27.8713	30.6849	27.5926	21.9767	28.7929
locus_tag=F7O84_RS18445]	6666666.269962.peg.2199	750	75.0503	25.769	38.7134	56.8528	52.2778	108.478	91.4869	102.493
locus_tag=F7O84_RS14705]	6666666.269962.peg.22	525	6.23762	0.864883	5.21744	5.9428	5.71733	6.45705	5.47826	8.61284
locus_tag=F7O84_RS11330]	6666666.269962.peg.220	210	3231.51	314.671	3283.73	2711.05	2905.12	3702.04	3134.35	3652.77
locus_tag=F7O84_RS18450]	6666666.269962.peg.2200	732	28.2778	5.50715	25.6328	21.9202	20.759	32.4176	31.4326	37.5047
locus_tag=F7O84_RS18455]	6666666.269962.peg.2201	744	27.0972	3.08328	24.299	27.5573	28.7451	24.3007	34.2391	23.4422
locus_tag=F7O84_RS18460]	6666666.269962.peg.2202	2625	131.327	39.7052	92.0879	93.4434	89.3333	156.045	167.322	189.728
locus_tag=F7O84_RS18465]	6666666.269962.peg.2203	1125	6.10726	0.960041	4.74787	7.6596	5.16942	5.52436	6.93913	6.60317
locus_tag=F7O84_RS18470]	6666666.269962.peg.2204	1473	71.5625	4.81971	63.6905	69.2923	67.2456	72.1103	81.1697	75.8666
locus_tag=F7O84_RS18475]	6666666.269962.peg.2205	1473	83.8506	12.4461	68.3395	71.1078	78.8352	79.7816	114.921	90.119
locus_tag=F7O84_RS18480]	6666666.269962.peg.2206	1236	1816.35	893.353	899.202	856.2	1013.59	2840.5	2885.06	2403.55
locus_tag=F7O84_RS18485]	6666666.269962.peg.2207	852	3549.34	1043.45	2486.14	2500.93	2530.62	4319.67	5262.21	4196.48
locus_tag=F7O84_RS18490]	6666666.269962.peg.2208	852	2846.01	1125.09	1631.28	1751.28	1780.22	3946.99	4023.82	3942.5
locus_tag=F7O84_RS18495]	6666666.269962.peg.2209	801	1577.64	662.392	875.607	888.823	981.327	2238.1	2202.59	2279.42
locus_tag=F7O84_RS11335]	6666666.269962.peg.221	1428	782.351	37.409	741.951	759.496	748.56	767.17	877.845	799.085
locus_tag=F7O84_RS18500]	6666666.269962.peg.2210	738	1831.81	1097.63	681.449	689.099	831.998	3031.66	3070.39	2686.26
locus_tag=F7O84_RS18505]	6666666.269962.peg.2211	966	380.87	282.424	98.8195	89.5111	107.006	851.582	519.754	618.546
locus_tag=F7O84_RS18510]	6666666.269962.peg.2212	429	1753.46	589.876	1266.78	1165.7	1058.26	2723.55	1798.63	2507.81
locus_tag=F7O84_RS18515]	6666666.269962.peg.2213	387	5994.34	432.96	5578.11	5975.04	6715.78	5214.86	6571.79	5910.48
locus_tag=F7O84_RS08915]	6666666.269962.peg.2214	117	6312.42	1097.47	8231.52	6714.85	5329.76	4206.05	7283.27	6109.04
locus_tag=F7O84_RS18520]	6666666.269962.peg.2215	1056	21.1999	7.11158	27.3656	27.0127	30.556	16.0509	12.4506	13.7634
locus_tag=F7O84_RS18525]	6666666.269962.peg.2216	588	16.7081	2.94342	20.0313	14.1495	17.5476	19.2174	18.8664	10.4365
locus_tag=F7O84_RS18530]	6666666.269962.peg.2217	249	0.806831	0.876887	1.65009	0.596666	0	0	0	2.59423
locus_tag=F7O84_RS18535]	6666666.269962.peg.2218	1383	19.4132	4.98288	17.3302	26.8565	26.7225	19.6093	8.91257	17.0482
locus_tag=F7O84_RS18540]	6666666.269962.peg.2219	951	23.5053	5.1342	24.6265	29.0578	27.2227	28.5169	15.9855	15.6227
locus_tag=F7O84_RS11340]	6666666.269962.peg.222	630	12.68	5.27018	9.78271	5.89563	6.55111	17.0394	16.3043	20.5068
locus_tag=F7O84_RS18545]	6666666.269962.peg.2220	765	35.7801	11.8049	30.077	18.0614	23.7872	60.5612	40.8184	41.3754
locus_tag=F7O84_RS18550]	6666666.269962.peg.2221	873	49.3403	11.9682	47.0646	31.3137	33.7379	67.9543	63.0658	52.9053
locus_tag=F7O84_RS18555]	6666666.269962.peg.2222	816	12.722	4.26066	10.2383	15.476	18.1622	17.3098	6.0422	9.10364
locus_tag=F7O84_RS18560]	6666666.269962.peg.2223	1029	79.9584	9.47535	87.3123	87.2072	91.8856	61.4957	81.8544	69.995
locus_tag=F7O84_RS18565]	6666666.269962.peg.2224	609	7.57123	2.28048	8.99559	5.1231	4.00459	12.9883	7.42128	6.89451
locus_tag=F7O84_RS18570]	6666666.269962.peg.2225	1146	7.70281	1.09396	7.40959	8.42674	7.03909	8.38121	5.37787	9.58234
locus_tag=F7O84_RS18575]	6666666.269962.peg.2226	996	36.2314	4.12794	37.5397	31.4741	35.9755	38.5737	44.9646	28.8608
locus_tag=F7O84_RS18580]	6666666.269962.peg.2227	975	39.8884	1.54197	39.3315	40.8377	40.7909	41.143	35.8194	41.4079
locus_tag=F7O84_RS18585]	6666666.269962.peg.2228	1758	3.68089	0.808465	3.11622	3.29592	2.98794	6.10628	3.272	3.30698
locus_tag=F7O84_RS18590]	6666666.269962.peg.2229	564	287.254	87.3156	218.55	182.024	199.242	341.6	411.598	370.512
locus_tag=F7O84_RS03865]	6666666.269962.peg.223	114	0.651622	1.08604	0	3.90973	0	0	0	0
locus_tag=F7O84_RS18595]	6666666.269962.peg.2230	888	10.6519	6.62187	6.32351	2.17501	3.59144	17.1788	20.8211	13.8213
locus_tag=F7O84_RS18600]	6666666.269962.peg.2231	747	20.3664	4.57054	24.2014	25.4578	22.6024	14.3706	12.6506	22.9157
locus_tag=F7O84_RS18605]	6666666.269962.peg.2232	969	153.16	12.9653	154.625	138.604	131.455	157.428	150.525	186.323
locus_tag=F7O84_RS18610]	6666666.269962.peg.2233	435	4.75946	1.08883	3.4633	4.09848	3.45011	5.19533	5.66716	6.68237
locus_tag=F7O84_RS18615]	6666666.269962.peg.2234	450	10.3751	1.94956	11.261	13.2062	12.5067	7.53322	9.13043	8.61284
locus_tag=F7O84_RS18620]	6666666.269962.peg.2235	348	25.9042	12.1728	12.5938	18.3578	10.2425	40.5885	31.8778	41.7648
locus_tag=F7O84_RS18625]	6666666.269962.peg.2236	537	73.0217	5.66415	65.5459	76.6366	78.9526	78.9095	63.5049	74.5804
locus_tag=F7O84_RS18630]	6666666.269962.peg.2237	474	8.93596	3.37233	5.77881	10.9704	17.0186	7.1518	5.20088	7.49535
locus_tag=F7O84_RS18635]	6666666.269962.peg.2238	309	12.5078	2.37979	9.75105	9.13537	12.7495	14.6276	17.2858	11.4977
locus_tag=F7O84_RS18640]	6666666.269962.peg.2239	903	15.4574	3.11294	11.3752	10.2008	16.4124	21.2732	17.7452	15.7377
locus_tag=F7O84_RS11345]	6666666.269962.peg.224	1827	310.458	100.664	426.241	417.655	389.472	186.475	227.586	215.321
locus_tag=F7O84_RS18645]	6666666.269962.peg.2240	438	15.7511	2.83287	19.3867	15.264	17.1324	7.73961	18.7612	16.2228
locus_tag=F7O84_RS18650]	6666666.269962.peg.2241	708	33.4979	2.52955	35.4001	31.4767	36.5661	27.9304	35.3998	34.2141
locus_tag=F7O84_RS18655]	6666666.269962.peg.2242	573	121.919	16.1315	149.626	142.606	120.483	99.5884	118.313	100.896
locus_tag=F7O84_RS18660]	6666666.269962.peg.2243	453	15.6296	4.60913	20.5588	18.0383	21.5346	16.2139	8.16297	9.26878
locus_tag=F7O84_RS16165]	6666666.269962.peg.2244	396	127.957	43.4646	101.681	64.1552	87.6413	228.28	147.332	138.654
locus_tag=F7O84_RS16170]	6666666.269962.peg.2245	465	43.4761	23.9545	46.5362	76.6812	79.0743	37.6661	3.53436	17.3646
locus_tag=F7O84_RS09865]	6666666.269962.peg.2246	231	19.8498	17.3827	29.0517	34.7306	47.9151	2.44585	3.55731	1.39819
locus_tag=F7O84_RS11275]	6666666.269962.peg.2247	2289	9.25246	1.03666	10.1118	9.28156	11.474	7.89853	7.71838	9.0305
locus_tag=F7O84_RS11270]	6666666.269962.peg.2248	888	9.5885	1.01559	8.48275	9.70389	11.1968	8.90753	8.32843	10.9115
locus_tag=F7O84_RS11265]	6666666.269962.peg.2249	846	8.61261	0.842717	8.5801	8.25388	7.31772	8.68191	7.77058	11.0715
locus_tag=F7O84_RS11350]	6666666.269962.peg.225	885	54.0508	6.51671	51.5333	65.9751	46.635	47.8807	50.6042	61.6767
locus_tag=F7O84_RS11260]	6666666.269962.peg.2250	1692	1.66082	0.564828	2.42833	1.14149	1.66312	2.33744	0.485661	1.90887
locus_tag=F7O84_RS11255]	6666666.269962.peg.2251	1020	7.66878	2.39767	9.2648	8.88506	9.74783	9.97044	4.02813	4.11643
locus_tag=F7O84_RS11250]	6666666.269962.peg.2252	666	157.718	25.8682	157.933	124.031	113.799	170.516	191.862	188.163
locus_tag=F7O84_RS11245]	6666666.269962.peg.2253	798	25.4936	12.6196	11.6706	12.8463	14.1053	46.7287	36.0412	31.5696
locus_tag=F7O84_RS11240]	6666666.269962.peg.2254	1263	48.8616	17.8464	30.905	26.9379	35.2028	51.8916	86.8584	61.3741
locus_tag=F7O84_RS11235]	6666666.269962.peg.2255	873	11.7475	3.58261	6.43216	7.31788	10.7445	14.8852	12.2367	18.8683
locus_tag=F7O84_RS11230]	6666666.269962.peg.2256	837	14.0825	7.81597	6.21792	5.8576	6.72401	24.9757	17.1809	23.5387
locus_tag=F7O84_RS11225]	6666666.269962.peg.2257	798	19.8148	11.9128	6.86506	8.378	8.46315	38.9405	33.9817	22.2606
locus_tag=F7O84_RS11220]	6666666.269962.peg.2258	939	12.7	4.2982	8.45959	9.01862	7.79169	12.6356	21.4405	16.8542
locus_tag=F7O84_RS11215]	6666666.269962.peg.2259	396	4.31362	3.40183	1.03756	0.750353	0.947474	7.13374	6.22529	9.78731
locus_tag=F7O84_RS11355]	6666666.269962.peg.226	819	38.1834	7.95272	30.9368	46.258	41.9179	48.9798	21.5719	39.4361
locus_tag=F7O84_RS11210]	6666666.269962.peg.2260	660	14.2107	7.33347	8.30048	6.07786	6.25333	28.2496	16.8083	19.5746
locus_tag=F7O84_RS11205]	6666666.269962.peg.2261	426	22.6331	15.2984	8.68043	6.2776	7.046	29.178	48.2241	36.3923
locus_tag=F7O84_RS11200]	6666666.269962.peg.2262	462	195.241	83.7683	110.278	128.31	95.8302	244.585	279.249	313.194
locus_tag=F7O84_RS11195]	6666666.269962.peg.2263	864	136.154	54.2008	93.683	88.5573	63.6189	185.061	179.28	206.723
locus_tag=F7O84_RS11190]	6666666.269962.peg.2264	873	35.9596	2.95998	32.4745	37.0999	34.8123	31.712	38.5925	41.0664
locus_tag=F7O84_RS11185]	6666666.269962.peg.2265	1746	65.19	4.78877	65.1844	73.0937	65.2194	71.5139	50.8292	65.2992
locus_tag=F7O84_RS11180]	6666666.269962.peg.2266	396	96.3847	6.06193	108.252	95.2948	84.3252	98.4456	100.642	91.3483
locus_tag=F7O84_RS11175]	6666666.269962.peg.2267	894	91.2907	15.4199	106.778	108.852	104.502	86.5815	64.8015	76.2294
locus_tag=F7O84_RS11170]	6666666.269962.peg.2268	1065	862.985	143.227	1225.03	930.62	796.727	718.839	748.824	757.869
locus_tag=F7O84_RS11165]	6666666.269962.peg.2269	891	106.717	27.0646	125.891	131.228	144.227	91.9459	58.5639	88.4483
locus_tag=F7O84_RS11360]	6666666.269962.peg.227	1761	9.70302	3.16572	5.9885	6.24314	8.0963	14.4376	14.4656	8.98699
locus_tag=F7O84_RS11160]	6666666.269962.peg.2270	1008	28.3564	10.9398	34.783	41.4168	41.6889	18.4968	15.4891	18.2638
locus_tag=F7O84_RS11155]	6666666.269962.peg.2271	753	33.3461	15.0274	44.7432	46.5637	53.8135	17.2574	15.8237	21.8752
locus_tag=F7O84_RS11150]	6666666.269962.peg.2272	885	75.3371	6.89874	65.616	66.143	73.5561	87.462	80.7811	78.4644
locus_tag=F7O84_RS11145]	6666666.269962.peg.2273	1911	144.633	53.7725	187.126	208.122	199.969	88.6957	92.451	91.4353
locus_tag=F7O84_RS11140]	6666666.269962.peg.2274	441	129.333	8.44196	136.337	128.693	104.648	135.803	131.366	139.153
locus_tag=F7O84_RS11135]	6666666.269962.peg.2275	1293	572.634	115.16	569.757	425.142	377.521	603.008	759.457	700.917
locus_tag=F7O84_RS18695]	6666666.269962.peg.2276	132	5.59545	2.30356	7.26292	9.00424	5.68484	4.28024	0	7.34049
locus_tag=F7O84_RS11130]	6666666.269962.peg.2277	1335	93.324	22.3961	107.412	120.303	119.446	63.4822	78.1729	71.1285
locus_tag=F7O84_RS11125]	6666666.269962.peg.2278	549	116.108	12.3775	120.992	143.158	121.308	91.5925	110.763	108.837
locus_tag=F7O84_RS11115]	6666666.269962.peg.2279	348	11.3925	6.56597	8.65826	18.7847	22.1023	12.9883	1.18066	4.64054
locus_tag=F7O84_RS11365]	6666666.269962.peg.228	1140	9.42451	2.68255	7.68886	6.3859	7.07613	11.399	15.4977	8.49951
locus_tag=F7O84_RS11110]	6666666.269962.peg.2280	444	12.965	3.67634	8.63698	14.0539	11.8306	22.9051	10.1792	10.1841
locus_tag=F7O84_RS11105]	6666666.269962.peg.2281	858	100.326	14.1545	82.3663	84.6745	119.382	108.652	115.407	91.4737
locus_tag=F7O84_RS11100]	6666666.269962.peg.2282	240	35.068	8.21858	26.2503	26.6188	40.6466	54.1451	29.1032	33.6439
locus_tag=F7O84_RS11095]	6666666.269962.peg.2283	1578	539.672	61.6033	481.956	574.32	611.899	420.701	617.606	531.548
locus_tag=F7O84_RS11090]	6666666.269962.peg.2284	936	634.416	77.1958	670.011	695.548	767.636	486.521	636.057	550.725
locus_tag=F7O84_RS11085]	6666666.269962.peg.2285	357	18.5148	5.09507	23.7854	23.3051	11.5608	23.7392	11.5089	17.1895
locus_tag=F7O84_RS11080]	6666666.269962.peg.2286	930	582.072	101.246	517.347	468.235	456.896	630.604	657.391	761.958
locus_tag=F7O84_RS11075]	6666666.269962.peg.2287	837	33.4035	8.54214	42.0528	39.4056	44.3785	20.9256	28.9621	24.6963
locus_tag=F7O84_RS11070]	6666666.269962.peg.2288	1029	48.4948	4.0403	43.9224	45.3362	47.4013	56.005	53.1056	45.1986
locus_tag=F7O84_RS11065]	6666666.269962.peg.2289	939	50.5461	6.27772	52.2161	44.4602	39.1582	56.5594	61.696	49.1867
locus_tag=F7O84_RS11370]	6666666.269962.peg.229	1263	23.8848	5.75889	16.2658	17.7625	20.3493	25.9458	33.8325	29.1527
locus_tag=F7O84_RS11060]	6666666.269962.peg.2290	192	1.97983	1.08763	1.42664	1.5476	0	2.94267	4.27989	1.68219
locus_tag=F7O84_RS11055]	6666666.269962.peg.2291	636	12.7649	2.98442	10.5518	11.68	19.4679	14.2136	13.5664	7.10965
locus_tag=F7O84_RS11050]	6666666.269962.peg.2292	654	15.5015	2.37656	13.1932	17.4922	18.9321	16.4141	10.6801	16.2972
locus_tag=F7O84_RS11045]	6666666.269962.peg.2293	321	409.295	118.791	372.048	274.461	225.003	563.232	492.787	528.241
locus_tag=F7O84_RS11040]	6666666.269962.peg.2294	1224	240.642	56.728	254.222	315.104	322.782	162.02	192.343	197.377
locus_tag=F7O84_RS11035]	6666666.269962.peg.2295	927	48.4617	8.87985	59.6882	53.8506	58.4858	36.5691	37.2309	44.9456
locus_tag=F7O84_RS11030]	6666666.269962.peg.2296	669	98.4572	30.9267	87.6203	122.365	134.04	131.747	38.6917	76.2796
locus_tag=F7O84_RS11025]	6666666.269962.peg.2297	333	28.2505	9.3865	22.2094	29.8924	30.4216	52.5968	11.1046	23.2779
locus_tag=F7O84_RS11020]	6666666.269962.peg.2298	1017	94.2903	15.0888	111.102	115.408	96.4746	99.443	64.2362	79.078
locus_tag=F7O84_RS11015]	6666666.269962.peg.2299	687	4622.75	304.738	4340.39	4701.9	5156.4	4329.14	4284.52	4924.17
locus_tag=F7O84_RS14700]	6666666.269962.peg.23	1005	11.9084	2.58404	8.7217	10.9395	8.77333	15.1789	11.4471	16.3901
locus_tag=F7O84_RS11375]	6666666.269962.peg.230	912	6.42692	3.49417	2.70312	3.42102	2.67412	9.29263	11.2629	9.2078
locus_tag=F7O84_RS11010]	6666666.269962.peg.2300	1107	28.9459	6.08094	19.5477	27.9156	23.7254	38.789	26.3521	37.3456
locus_tag=F7O84_RS11005]	6666666.269962.peg.2301	1017	119.938	16.5173	104.907	107.958	97.397	129.443	144.632	135.29
locus_tag=F7O84_RS11000]	6666666.269962.peg.2302	1026	0.7261	0.665152	0	0.86883	0.182846	1.10135	0	2.20358
locus_tag=F7O84_RS10995]	6666666.269962.peg.2303	675	0.470411	0.397043	0.811602	0.220104	0.833777	0	0	0.956982
locus_tag=F7O84_RS10990]	6666666.269962.peg.2304	2286	1.12662	0.26077	1.0185	1.03986	1.23097	1.23577	0.539199	1.69544
locus_tag=F7O84_RS10985]	6666666.269962.peg.2305	7629	3.97284	0.542887	4.27264	3.48591	4.69676	3.9251	4.57778	2.87885
locus_tag=F7O84_RS10980]	6666666.269962.peg.2306	324	5.71073	4.31931	1.69084	3.20984	8.68518	15.6942	0	4.98428
locus_tag=F7O84_RS10975]	6666666.269962.peg.2307	255	0.985683	0.985683	0	1.16525	0	2.21565	0	2.53319
locus_tag=F7O84_RS10970]	6666666.269962.peg.2308	357	0.307727	0.307727	0	0.416162	0.52549	0	0	0.90471
locus_tag=F7O84_RS10965]	6666666.269962.peg.2309	906	3.78948	0.803773	3.93036	4.75555	4.34834	3.74167	4.53498	1.42597
locus_tag=F7O84_RS11380]	6666666.269962.peg.231	1080	4.54946	2.92752	1.77538	2.06347	1.38963	12.5554	5.32608	4.1868
locus_tag=F7O84_RS10960]	6666666.269962.peg.2310	462	6.53381	1.95933	9.18981	7.39634	5.68484	2.44585	8.89327	5.59275
locus_tag=F7O84_RS10955]	6666666.269962.peg.2311	576	7.38716	1.38019	9.74874	6.96421	8.14235	3.92355	7.13315	8.41097
locus_tag=F7O84_RS10950]	6666666.269962.peg.2312	1233	1.82746	0.498078	2.11046	2.04841	2.28224	1.8329	0.333227	2.35753
locus_tag=F7O84_RS10945]	6666666.269962.peg.2313	273	39.8149	7.66348	44.6493	32.6527	28.1743	39.3218	36.1204	57.971
locus_tag=F7O84_RS10940]	6666666.269962.peg.2314	534	20.7039	6.14784	18.4662	19.1972	12.9985	39.1474	13.8495	20.5644
locus_tag=F7O84_RS10970]	6666666.269962.peg.2315	156	8.31647	7.86954	7.02348	16.1903	24.0513	0	2.63378	0
locus_tag=F7O84_RS10935]	6666666.269962.peg.2316	906	3.9816	0.976063	2.72102	3.44367	4.5554	6.23611	4.08148	2.85193
locus_tag=F7O84_RS07580]	6666666.269962.peg.2317	120	0	0	0	0	0	0	0	0
locus_tag=F7O84_RS10930]	6666666.269962.peg.2318	462	0.326713	0.336802	0.296446	0.96474	0	0	0	0.699094
locus_tag=F7O84_RS10925]	6666666.269962.peg.2319	687	1.5105	0.511835	1.79421	1.08129	1.09228	0.822404	2.39225	1.88053
locus_tag=F7O84_RS11385]	6666666.269962.peg.232	2514	5.04597	2.54141	2.01569	2.36388	3.13413	8.54005	7.0276	7.19449
locus_tag=F7O84_RS10920]	6666666.269962.peg.2320	354	0.73924	0.73924	1.16066	1.67876	0	1.59602	0	0
locus_tag=F7O84_RS10920]	6666666.269962.peg.2321	882	1.14323	0.497082	1.24225	2.18981	1.48889	0.64058	0.931676	0.366192
locus_tag=F7O84_RS10915]	6666666.269962.peg.2322	120	2.09053	2.78738	0	0	3.12666	9.41653	0	0
locus_tag=F7O84_RS10910]	6666666.269962.peg.2323	591	0.789841	0.538454	1.62217	0.754162	1.26971	0	0	1.093
locus_tag=F7O84_RS10905]	6666666.269962.peg.2324	255	16.5971	3.78717	13.9643	10.4873	13.978	19.9409	20.9463	20.2655
locus_tag=F7O84_RS10895]	6666666.269962.peg.2325	381	0.0820647	0.136774	0	0	0.492388	0	0	0
locus_tag=F7O84_RS10890]	6666666.269962.peg.2326	789	2.05053	1.3783	0.173584	1.12981	0.713307	4.29652	3.12448	2.86549
locus_tag=F7O84_RS10885]	6666666.269962.peg.2327	399	2.0267	1.56903	1.37301	3.72356	4.23158	2.83204	0	0
locus_tag=F7O84_RS10880]	6666666.269962.peg.2328	696	3.26738	0.805003	2.55812	3.20194	2.42586	5.68239	2.95165	2.78432
locus_tag=F7O84_RS10875]	6666666.269962.peg.2329	1005	6.20593	1.29749	4.90595	5.32191	6.53333	4.49745	8.58533	7.39161
locus_tag=F7O84_RS11390]	6666666.269962.peg.233	837	2.37768	1.20815	1.14541	1.24252	1.12067	4.72514	2.9453	3.08704
locus_tag=F7O84_RS10870]	6666666.269962.peg.2330	558	2.70523	1.15344	2.94533	4.26007	4.37061	2.02506	1.47265	1.15764
locus_tag=F7O84_RS10865]	6666666.269962.peg.2331	330	0.87866	1.03321	0.415024	3.15148	1.70545	0	0	0
locus_tag=F7O84_RS10860]	6666666.269962.peg.2332	1524	42.5913	9.74514	36.576	37.1425	35.3288	60.7996	32.0823	53.6183
locus_tag=F7O84_RS10855]	6666666.269962.peg.2333	1785	26.9333	3.74112	27.8519	34.8744	28.3764	27.8539	20.0256	22.6177
locus_tag=F7O84_RS10850]	6666666.269962.peg.2334	1338	109.478	21.9628	138.084	133.136	123.104	78.5415	93.9656	90.0389
locus_tag=F7O84_RS10845]	6666666.269962.peg.2335	933	14.4586	2.40711	16.7344	18.631	12.8686	12.7169	10.569	15.2317
locus_tag=F7O84_RS10840]	6666666.269962.peg.2336	852	25.2218	6.19847	25.559	34.3524	34.3493	14.589	23.1476	19.3334
locus_tag=F7O84_RS10835]	6666666.269962.peg.2337	3150	20.2389	6.75291	26.3481	27.8274	26.8	12.7347	15.5217	12.2015
locus_tag=F7O84_RS10830]	6666666.269962.peg.2338	1326	16.9525	6.77746	22	23.8653	25.3246	11.9304	11.7745	6.82012
locus_tag=F7O84_RS10825]	6666666.269962.peg.2339	1770	357.352	39.9925	390.059	416.919	385.057	294.626	319.875	337.579
locus_tag=F7O84_RS11395]	6666666.269962.peg.234	876	3.50426	1.22605	2.65786	2.0352	2.14155	3.86981	5.15932	5.1618
locus_tag=F7O84_RS10820]	6666666.269962.peg.2340	837	16.1358	5.67163	20.7809	21.4778	19.7238	19.5756	6.38148	8.87523
locus_tag=F7O84_RS10815]	6666666.269962.peg.2341	387	19.9567	4.57506	14.5097	22.6502	22.2987	27.7386	11.6785	20.8644
locus_tag=F7O84_RS10810]	6666666.269962.peg.2342	360	784.891	147.248	731.583	950.022	1061.5	706.24	588.913	671.083
locus_tag=F7O84_RS10805]	6666666.269962.peg.2343	1602	220.941	16.176	245.874	243.907	217.227	209.844	187.225	221.571
locus_tag=F7O84_RS04420]	6666666.269962.peg.2344	144	91.0326	35.7053	114.132	122.777	143.305	35.312	65.625	65.0449
locus_tag=F7O84_RS10800]	6666666.269962.peg.2345	900	314.9	22.1377	361.569	331.806	311.207	277.474	317.739	289.607
locus_tag=F7O84_RS10790]	6666666.269962.peg.2346	1002	8.25167	1.87756	8.33776	11.5653	10.4846	6.20251	6.15074	6.76907
locus_tag=F7O84_RS10785]	6666666.269962.peg.2347	540	5.49819	1.44486	5.57977	4.40207	2.43185	6.27769	5.32608	8.9717
locus_tag=F7O84_RS10780]	6666666.269962.peg.2348	711	64.2057	22.4533	82.637	85.2553	92.0849	44.5001	39.8734	40.8837
locus_tag=F7O84_RS10775]	6666666.269962.peg.2349	312	380.613	62.788	307.277	330.949	361.37	510.666	334.49	438.923
locus_tag=F7O84_RS11400]	6666666.269962.peg.235	2490	25.043	2.99285	20.4612	25.3583	22.7531	25.4133	22.9361	33.3358
locus_tag=F7O84_RS10770]	6666666.269962.peg.2350	411	350.304	111.507	182.944	251.231	302.625	552.62	329.895	482.507
locus_tag=F7O84_RS10765]	6666666.269962.peg.2351	609	123.977	44.4217	112.895	182.724	176.818	145.655	35.0824	90.6893
locus_tag=F7O84_RS10760]	6666666.269962.peg.2352	681	398.97	71.9797	330.63	342.082	308.259	478.708	466.979	467.161
locus_tag=F7O84_RS10755]	6666666.269962.peg.2353	987	70.3005	8.05448	64.2467	57.2002	73.7475	91.0169	67.8538	67.7377
locus_tag=F7O84_RS10750]	6666666.269962.peg.2354	2211	201.499	21.2703	205.839	180.69	158.497	227.172	213.147	223.647
locus_tag=F7O84_RS10745]	6666666.269962.peg.2355	258	384.665	131.082	355.666	468.168	514.082	564.992	132.179	272.907
locus_tag=F7O84_RS10740]	6666666.269962.peg.2356	1440	25.1792	2.70007	23.397	22.595	23.9711	30.2114	28.2473	22.6536
locus_tag=F7O84_RS10735]	6666666.269962.peg.2357	1197	1.02101	0.22758	0.915341	0.992948	1.09708	0.472007	1.02975	1.61895
locus_tag=F7O84_RS10730]	6666666.269962.peg.2358	456	57.6396	28.9126	27.6319	27.694	30.8552	112.751	67.5772	79.3288
locus_tag=F7O84_RS10725]	6666666.269962.peg.2359	1872	8.8681	0.899155	9.21832	8.25388	7.71645	10.8652	9.21822	7.93651
locus_tag=F7O84_RS11405]	6666666.269962.peg.236	822	129.521	9.27192	139.124	140.798	124.154	109.287	136.457	127.307
locus_tag=F7O84_RS16350]	6666666.269962.peg.2360	114	0.274269	0.457115	0	0	1.64561	0	0	0
locus_tag=F7O84_RS13155]	6666666.269962.peg.2361	315	12.1224	6.26934	6.08702	8.96136	10.72	28.698	3.91304	14.3547
locus_tag=F7O84_RS13150]	6666666.269962.peg.2362	696	68.1898	12.7223	42.7009	56.9945	73.0453	91.73	66.7072	77.961
locus_tag=F7O84_RS13145]	6666666.269962.peg.2363	192	3633.96	812.997	3591.58	2712.95	2158.38	4208.01	4585.9	4546.97
locus_tag=F7O84_RS13140]	6666666.269962.peg.2364	1398	26.7663	4.8394	28.8023	31.3506	34.353	27.0776	18.2217	20.7928
locus_tag=F7O84_RS13135]	6666666.269962.peg.2365	1056	26.9251	2.54774	27.8844	28.4196	25.7594	26.7515	20.6213	32.1146
locus_tag=F7O84_RS13130]	6666666.269962.peg.2366	1434	33.139	6.43826	28.1747	35.0186	32.444	41.3697	19.4833	42.3434
locus_tag=F7O84_RS13125]	6666666.269962.peg.2367	1668	9.96437	1.97689	8.70356	11.9355	12.3717	11.5166	6.15811	9.10079
locus_tag=F7O84_RS13120]	6666666.269962.peg.2368	726	0.841869	0.550401	0.754589	1.63713	0.516804	0	1.69781	0.444878
locus_tag=F7O84_RS13115]	6666666.269962.peg.2369	1305	4.07408	1.54817	3.35835	2.96001	5.17517	6.49416	1.25937	5.1974
locus_tag=F7O84_RS11410]	6666666.269962.peg.237	657	54.2965	7.96254	67.124	41.6086	48.2563	65.3567	53.782	49.6516
locus_tag=F7O84_RS13110]	6666666.269962.peg.2370	576	1301.05	281.196	1734.56	1505.3	1352.28	1455.64	729.008	1029.5
locus_tag=F7O84_RS13105]	6666666.269962.peg.2371	132	1950.89	741.293	1205.64	979.211	1443.95	3432.75	2412.3	2231.51
locus_tag=F7O84_RS15115]	6666666.269962.peg.2372	123	2002.48	368.582	1856.17	1768.34	3022.95	1777.66	2087.75	1501.99
locus_tag=F7O84_RS13100]	6666666.269962.peg.2373	873	1736.18	557.661	1300.55	1047.31	1187.7	2547.32	2284.96	2049.25
locus_tag=F7O84_RS13095]	6666666.269962.peg.2374	996	1524.08	859.27	714.354	567.728	712.352	3041.09	1951.22	2157.75
locus_tag=F7O84_RS13090]	6666666.269962.peg.2375	837	63.6373	9.07752	68.888	58.3984	85.619	58.7268	62.3422	47.8491
locus_tag=F7O84_RS13085]	6666666.269962.peg.2376	999	15.8971	1.6349	16.1772	16.8052	18.9666	16.4012	16.0399	10.9924
locus_tag=F7O84_RS13080]	6666666.269962.peg.2377	465	32.5742	6.48625	25.9189	27.797	28.6443	41.3112	43.2959	28.4779
locus_tag=F7O84_RS13075]	6666666.269962.peg.2378	822	126.388	15.5586	103.135	109.891	128.262	149.84	119.462	147.738
locus_tag=F7O84_RS13070]	6666666.269962.peg.2379	804	270.63	36.1358	330.811	298.988	290.5	215.737	251.939	235.809
locus_tag=F7O84_RS11415]	6666666.269962.peg.238	222	243.236	100.409	217.158	311.194	345.623	374.116	62.9259	148.397
locus_tag=F7O84_RS13065]	6666666.269962.peg.2380	744	692.467	112.179	730.442	864.262	819.236	548.285	603.05	589.528
locus_tag=F7O84_RS13060]	6666666.269962.peg.2381	1338	40.9643	3.43644	42.3771	43.6382	41.7823	34.2035	46.3687	37.4156
locus_tag=F7O84_RS13055]	6666666.269962.peg.2382	690	30.1705	6.9125	23.8188	27.3455	25.5571	45.0356	23.223	36.0428
locus_tag=F7O84_RS13050]	6666666.269962.peg.2383	705	18.7675	3.57384	15.9299	23.3919	18.893	16.8295	12.8215	24.739
locus_tag=F7O84_RS13045]	6666666.269962.peg.2384	1188	159.649	11.6435	152.291	141.567	150.964	158.845	190.563	163.666
locus_tag=F7O84_RS13040]	6666666.269962.peg.2385	1902	18.9529	4.73816	13.4654	13.904	17.1621	29.7051	17.0655	22.4151
locus_tag=F7O84_RS13035]	6666666.269962.peg.2386	1014	122.621	5.93355	131.555	130.109	115.446	111.995	123.99	122.631
locus_tag=F7O84_RS13030]	6666666.269962.peg.2387	756	30.9294	7.25029	27.3553	29.0851	27.0481	48.5773	18.4782	35.0324
locus_tag=F7O84_RS13025]	6666666.269962.peg.2388	753	33.1958	3.24294	31.102	30.3848	29.3981	39.0167	37.1037	32.1695
locus_tag=F7O84_RS13020]	6666666.269962.peg.2389	399	15.6561	11.3645	20.5952	27.5543	32.9123	0	7.20823	5.66634
locus_tag=F7O84_RS17815]	6666666.269962.peg.239	129	297.764	140.452	135.896	203.852	251.587	643.828	178.362	373.056
locus_tag=F7O84_RS13015]	6666666.269962.peg.2390	294	27.8229	7.02736	17.702	26.2777	36.3714	40.3566	20.9627	25.2672
locus_tag=F7O84_RS13010]	6666666.269962.peg.2391	2418	39.5696	7.23518	34.6643	39.8153	45.6198	53.2747	22.7694	41.2743
locus_tag=F7O84_RS13005]	6666666.269962.peg.2392	1104	3.38093	0.417834	2.48112	3.49893	3.05869	4.09414	3.34948	3.80322
locus_tag=F7O84_RS13000]	6666666.269962.peg.2393	915	4.98109	1.50242	3.74202	3.57217	4.5106	7.40973	3.5923	7.0597
locus_tag=F7O84_RS12995]	6666666.269962.peg.2394	1599	12.7462	3.4022	9.25044	12.3576	13.6095	19.0804	6.42385	15.7552
locus_tag=F7O84_RS12990]	6666666.269962.peg.2395	1032	13.0912	1.87624	14.8636	12.5248	12.3612	15.3292	8.75884	14.7094
locus_tag=F7O84_RS12985]	6666666.269962.peg.2396	1446	9.41289	1.37381	7.48248	9.24709	9.47081	13.2847	7.38769	9.60456
locus_tag=F7O84_RS12980]	6666666.269962.peg.2397	1017	73.0272	12.8043	65.4489	61.3563	53.8635	85.5543	94.1323	77.8077
locus_tag=F7O84_RS12975]	6666666.269962.peg.2398	2397	3.87082	1.14538	3.48537	3.84286	3.67843	7.30695	1.54269	3.3686
locus_tag=F7O84_RS12970]	6666666.269962.peg.2399	1419	6.24442	2.60391	3.9572	4.18802	2.77632	9.95405	8.39691	8.19403
locus_tag=F7O84_RS14695]	6666666.269962.peg.24	1401	1.64425	0.502031	1.66187	0.742319	1.07123	1.61311	2.93269	1.84429
locus_tag=F7O84_RS06790]	6666666.269962.peg.240	150	54.5071	36.5421	52.044	96.0752	122.565	15.0664	21.913	19.3789
locus_tag=F7O84_RS12965]	6666666.269962.peg.2400	2670	9.56239	1.48632	7.43779	7.62325	9.41512	13.1197	10.4641	9.31444
locus_tag=F7O84_RS12960]	6666666.269962.peg.2401	666	15.104	2.91233	13.778	11.6001	11.2673	22.9051	16.0399	15.0337
locus_tag=F7O84_RS12955]	6666666.269962.peg.2402	2325	6.74272	1.17878	7.00989	8.94615	7.50399	7.04721	4.9481	5.001
locus_tag=F7O84_RS12950]	6666666.269962.peg.2403	1821	6.41116	0.774561	5.56556	5.95585	5.76913	8.37714	6.76885	6.0304
locus_tag=F7O84_RS12945]	6666666.269962.peg.2404	1434	8.19869	1.18477	8.02264	6.21631	6.80278	9.84993	9.74167	8.55878
locus_tag=F7O84_RS12940]	6666666.269962.peg.2405	1476	4.4104	0.739361	3.34044	4.2276	5.46531	3.44507	4.73223	5.25173
locus_tag=F7O84_RS12935]	6666666.269962.peg.2406	975	9.09898	0.89182	10.6757	8.22849	10.1977	8.69218	8.84949	7.95031
locus_tag=F7O84_RS18405]	6666666.269962.peg.2407	258	2.10728	1.40486	2.65422	2.30341	2.90852	0	4.77755	0
locus_tag=F7O84_RS12930]	6666666.269962.peg.2408	960	0.672903	0.304861	0.285329	1.08332	0.390833	1.17707	0.427989	0.672878
locus_tag=F7O84_RS12925]	6666666.269962.peg.2409	1011	1.26695	0.68675	0.406403	1.46953	0.927793	2.79422	0.406399	1.59734
locus_tag=F7O84_RS11420]	6666666.269962.peg.241	2802	622.947	46.6832	629.752	649.582	684.585	527.084	667.919	578.761
locus_tag=F7O84_RS12920]	6666666.269962.peg.2410	393	1.67945	1.36347	1.39397	0.756081	0.477353	4.31291	3.13641	0
locus_tag=F7O84_RS12915]	6666666.269962.peg.2411	1059	5.13384	0.634585	4.26781	5.47141	4.96015	6.40217	5.4317	4.26982
locus_tag=F7O84_RS12910]	6666666.269962.peg.2412	1539	17.0713	3.1318	18.4212	18.0524	24.1357	16.8873	9.61098	15.3201
locus_tag=F7O84_RS12905]	6666666.269962.peg.2413	240	0	0	0	0	0	0	0	0
locus_tag=F7O84_RS12900]	6666666.269962.peg.2414	1749	2.04162	0.453564	1.95766	3.22793	1.82344	1.61519	1.4095	2.216
locus_tag=F7O84_RS12895]	6666666.269962.peg.2415	1014	0.790349	0.435489	0.675335	0.439556	0.740039	1.67157	1.21559	0
locus_tag=F7O84_RS12890]	6666666.269962.peg.2416	1125	0.351951	0.256253	0	0.792373	0.667022	0	0.365217	0.287095
locus_tag=F7O84_RS12885]	6666666.269962.peg.2417	543	0.440028	0.440028	1.0089	0	1.03646	0	0	0.594809
locus_tag=F7O84_RS12880]	6666666.269962.peg.2418	1278	4.73884	0.588689	4.3938	4.53382	4.40375	6.18927	3.85793	5.05448
locus_tag=F7O84_RS12875]	6666666.269962.peg.2419	915	12.4857	5.55799	5.68787	8.28095	7.17595	17.2894	12.124	24.356
locus_tag=F7O84_RS11425]	6666666.269962.peg.242	231	393.94	49.4426	394.273	450.855	464.533	298.394	414.427	341.158
locus_tag=F7O84_RS12870]	6666666.269962.peg.2420	1536	4.78588	0.895306	4.01244	4.44936	5.00755	5.5175	3.20992	6.5185
locus_tag=F7O84_RS12865]	6666666.269962.peg.2421	945	0.083444	0.083444	0.144929	0.157217	0.198518	0	0	0
locus_tag=F7O84_RS12860]	6666666.269962.peg.2422	1482	1.01477	0.317278	0.831728	0.501248	0.759514	1.14371	1.10896	1.74349
locus_tag=F7O84_RS12855]	6666666.269962.peg.2423	2091	1.74241	0.467423	1.57197	1.56315	2.33266	1.35101	2.55442	1.08124
locus_tag=F7O84_RS12850]	6666666.269962.peg.2424	1083	0.567885	0.211076	0.885231	0.548735	0.69289	0.521691	0.758761	0
locus_tag=F7O84_RS12845]	6666666.269962.peg.2425	684	16.1774	4.00744	13.2152	13.9013	15.3591	23.1283	10.2117	21.2488
locus_tag=F7O84_RS12840]	6666666.269962.peg.2426	540	1.34262	0.599926	1.0145	1.10052	0.694814	2.09256	0.760869	2.39245
locus_tag=F7O84_RS12835]	6666666.269962.peg.2427	1593	139.757	12.2584	146.587	122.736	120.003	144.706	159.138	145.372
locus_tag=F7O84_RS12830]	6666666.269962.peg.2428	831	839.332	197.262	889.485	992.433	1227.86	540.516	749.058	636.635
locus_tag=F7O84_RS12825]	6666666.269962.peg.2429	381	71.0709	3.56201	75.8481	73.7	74.3506	63.7655	70.0958	68.6653
locus_tag=F7O84_RS11430]	6666666.269962.peg.243	2604	15.0556	7.61557	6.73218	7.30298	8.28494	27.3383	15.6206	25.0546
locus_tag=F7O84_RS12820]	6666666.269962.peg.2430	1104	106.418	16.1999	121.699	117.349	128.805	74.7181	104.95	90.9848
locus_tag=F7O84_RS12815]	6666666.269962.peg.2431	999	77.0215	6.12688	74.5797	78.3747	86.7579	69.5636	84.3125	68.5406
locus_tag=F7O84_RS12810]	6666666.269962.peg.2432	1035	58.5762	5.78061	55.9741	60.2892	66.8834	51.8592	65.8979	50.5536
locus_tag=F7O84_RS12805]	6666666.269962.peg.2433	804	45.6199	3.17717	49.4002	51.3712	43.1666	41.4608	42.9266	45.3941
locus_tag=F7O84_RS12800]	6666666.269962.peg.2434	480	116.635	21.7186	121.835	143.927	149.298	91.8112	115.557	77.3809
locus_tag=F7O84_RS17785]	6666666.269962.peg.2435	153	2.74891	1.44506	4.47575	3.88418	1.22614	0	2.68542	4.22198
locus_tag=F7O84_RS12795]	6666666.269962.peg.2436	441	15.6661	5.25834	16.4598	11.4544	7.65714	24.3421	12.1118	21.9715
locus_tag=F7O84_RS12790]	6666666.269962.peg.2437	495	7.52437	1.66806	8.30048	9.00424	6.06383	10.2726	4.98023	6.52488
locus_tag=F7O84_RS12785]	6666666.269962.peg.2438	888	53.8806	4.83838	53.6727	51.8656	46.4774	48.9914	66.6275	55.6488
locus_tag=F7O84_RS12780]	6666666.269962.peg.2439	699	34.3943	5.17346	28.8023	32.7321	31.1324	43.6474	29.3898	40.6615
locus_tag=F7O84_RS11435]	6666666.269962.peg.244	771	11.8002	4.79263	7.63838	4.62474	8.75953	13.1905	20.2504	16.3376
locus_tag=F7O84_RS12775]	6666666.269962.peg.2440	2067	52.1718	14.3998	33.1959	37.7355	42.3847	72.7082	61.2229	65.7838
locus_tag=F7O84_RS12770]	6666666.269962.peg.2441	1299	8.1771	3.79725	4.1119	4.11741	4.91023	10.0037	14.2333	11.686
locus_tag=F7O84_RS12765]	6666666.269962.peg.2442	999	9.45181	0.996223	9.59665	7.43593	9.20159	11.8767	9.87073	8.72923
locus_tag=F7O84_RS12760]	6666666.269962.peg.2443	975	47.4525	9.66327	35.2579	42.5139	35.5959	52.1531	63.2107	55.9834
locus_tag=F7O84_RS12755]	6666666.269962.peg.2444	288	0.698483	0.383709	0.475548	0.515868	0.651388	0	1.42663	1.12146
locus_tag=F7O84_RS12750]	6666666.269962.peg.2445	339	4.92747	2.05563	8.08011	7.88867	4.98053	3.33329	2.42401	2.85824
locus_tag=F7O84_RS12745]	6666666.269962.peg.2446	1176	3.15406	1.01634	2.21275	4.54806	1.75476	3.84348	2.44565	4.11966
locus_tag=F7O84_RS12740]	6666666.269962.peg.2447	1410	4.22505	1.72201	3.30253	1.89664	2.52794	4.00703	5.82793	7.7882
locus_tag=F7O84_RS12735]	6666666.269962.peg.2448	657	22.1367	4.80007	20.0121	15.151	16.8469	30.0985	25.6402	25.0716
locus_tag=F7O84_RS12730]	6666666.269962.peg.2449	780	531.684	174.015	758.009	728.945	630.143	344.066	360.828	368.116
locus_tag=F7O84_RS11440]	6666666.269962.peg.245	603	3.33161	2.20147	0.227127	0.985538	2.17778	3.74787	7.49513	5.35624
locus_tag=F7O84_RS12725]	6666666.269962.peg.2450	849	18.4682	3.60108	15.4864	20.2993	22.5385	21.2953	10.6468	20.543
locus_tag=F7O84_RS12720]	6666666.269962.peg.2451	1392	21.3817	3.87401	25.0893	26.8963	23.5847	17.8589	13.2824	21.5785
locus_tag=F7O84_RS12715]	6666666.269962.peg.2452	660	11.7802	2.216	13.0733	13.5064	8.81151	15.4089	10.583	9.29795
locus_tag=F7O84_RS12710]	6666666.269962.peg.2453	765	59.989	8.72842	66.062	66.0311	74.059	46.5287	49.4117	57.8411
locus_tag=F7O84_RS12705]	6666666.269962.peg.2454	564	18.055	7.37705	9.47049	15.2785	21.6205	34.0598	7.28492	20.6158
locus_tag=F7O84_RS12700]	6666666.269962.peg.2455	852	1174.59	74.5008	1215.1	1090.38	1081.34	1267.25	1264.92	1128.54
locus_tag=F7O84_RS12695]	6666666.269962.peg.2456	651	1539.5	181.979	1398.4	1682.65	1942.28	1346.09	1465.5	1402.07
locus_tag=F7O84_RS12690]	6666666.269962.peg.2457	765	1537.75	216.888	1342.72	1337.32	1282.55	1623.34	1813.73	1826.85
locus_tag=F7O84_RS12685]	6666666.269962.peg.2458	246	21.6196	7.68244	18.9291	13.8907	20.5902	41.3409	10.0212	24.9457
locus_tag=F7O84_RS12680]	6666666.269962.peg.2459	1038	21.2355	3.52414	18.2083	15.7444	19.8805	30.4813	22.5622	20.5364
locus_tag=F7O84_RS11445]	6666666.269962.peg.246	579	0.740312	0.630076	0	0.513195	0	1.95161	1.41924	0.557826
locus_tag=F7O84_RS12675]	6666666.269962.peg.2460	951	1.90917	0.596764	1.58416	0.6249	2.16992	2.97051	1.72816	2.37736
locus_tag=F7O84_RS12670]	6666666.269962.peg.2461	897	1.74432	0.802323	0.916106	0.993779	2.5097	1.8896	0.916097	3.24062
locus_tag=F7O84_RS12665]	6666666.269962.peg.2462	1602	7.81647	3.00165	6.2409	3.98783	4.21573	10.2277	11.5413	10.6854
locus_tag=F7O84_RS12660]	6666666.269962.peg.2463	1749	22.2946	3.37312	25.9194	26.8428	24.241	15.8288	20.4378	20.498
locus_tag=F7O84_RS12655]	6666666.269962.peg.2464	903	21.2995	3.61214	25.0255	25.0084	23.4759	22.5246	11.3751	20.3875
locus_tag=F7O84_RS12650]	6666666.269962.peg.2465	2394	16.6264	1.78696	15.2748	15.6389	14.4187	15.8122	17.1625	21.4511
locus_tag=F7O84_RS12645]	6666666.269962.peg.2466	1287	27.9616	4.58278	23.4116	25.9738	28.1327	36.8759	20.751	32.6244
locus_tag=F7O84_RS12640]	6666666.269962.peg.2467	345	85.2925	31.5185	52.7983	38.3267	71.2336	129.375	135.766	84.256
locus_tag=F7O84_RS12635]	6666666.269962.peg.2468	1611	35.4894	2.50426	34.0907	34.86	38.1954	35.4216	40.2963	30.0728
locus_tag=F7O84_RS17035]	6666666.269962.peg.2469	126	1.69424	1.33192	1.08697	3.53738	2.97778	0	0	2.56334
locus_tag=F7O84_RS11450]	6666666.269962.peg.247	1083	0.782015	0.482331	0.379385	0.960286	0.519667	1.04338	0	1.78937
locus_tag=F7O84_RS02125]	6666666.269962.peg.2470	1332	5.0851	2.60987	2.77617	4.46156	11.8306	2.12084	6.16921	3.15222
locus_tag=F7O84_RS02130]	6666666.269962.peg.2471	186	12.4348	4.28771	12.5177	11.9814	25.215	9.11277	8.8359	6.94584
locus_tag=F7O84_RS02135]	6666666.269962.peg.2472	1623	824.16	197.922	581.333	817.546	1332.5	678.129	909.583	625.863
locus_tag=F7O84_RS02140]	6666666.269962.peg.2473	459	214.067	35.2334	154.861	194.856	186.782	260.955	243.478	243.467
locus_tag=F7O84_RS02145]	6666666.269962.peg.2474	1101	128.159	23.9099	124.643	166.517	161.53	125.725	72.0234	118.515
locus_tag=F7O84_RS02150]	6666666.269962.peg.2475	3567	21.9701	6.031	14.4368	18.6181	20.7217	35.3219	16.0109	26.7114
locus_tag=F7O84_RS02155]	6666666.269962.peg.2476	1293	30.008	4.65639	24.68	26.1979	27.8571	39.7635	27.3277	34.2215
locus_tag=F7O84_RS02160]	6666666.269962.peg.2477	801	17.6265	2.87981	15.7305	14.8384	19.205	24.6875	14.3625	16.9354
locus_tag=F7O84_RS02165]	6666666.269962.peg.2478	1185	30.248	9.69535	20.3414	20.1854	21.2138	53.8769	30.1651	35.7051
locus_tag=F7O84_RS02170]	6666666.269962.peg.2479	708	122.75	34.7732	86.0823	88.1347	96.9796	191.523	115.484	158.297
locus_tag=F7O84_RS11455]	6666666.269962.peg.248	387	0.139096	0.231827	0	0	0	0	0	0.834577
locus_tag=F7O84_RS02175]	6666666.269962.peg.2480	1446	525.863	103.315	605.987	612.363	669.184	354.781	493.839	419.027
locus_tag=F7O84_RS02180]	6666666.269962.peg.2481	1431	194.61	18.6295	239.748	205.361	188.386	156.35	194.093	183.722
locus_tag=F7O84_RS02185]	6666666.269962.peg.2482	1761	171.8	15.3441	161.145	189.741	181.315	151.435	156.788	190.377
locus_tag=F7O84_RS02190]	6666666.269962.peg.2483	885	4.43824	0.793537	3.24985	4.02901	5.51141	5.74568	3.71407	4.37941
locus_tag=F7O84_RS02195]	6666666.269962.peg.2484	1281	196.528	20.4583	213.188	189.859	238.271	183.038	199.501	155.313
locus_tag=F7O84_RS02200]	6666666.269962.peg.2485	651	10.3154	1.54729	9.67752	12.0956	11.2387	12.1504	6.31136	10.4188
locus_tag=F7O84_RS02205]	6666666.269962.peg.2486	255	52.4699	9.35754	46.1897	57.6801	43.4055	75.3322	40.2813	51.9303
locus_tag=F7O84_RS02210]	6666666.269962.peg.2487	597	24.7331	6.20152	15.5999	22.3975	17.5973	39.7482	25.4643	27.5914
locus_tag=F7O84_RS02215]	6666666.269962.peg.2488	645	155.586	36.3153	130.375	167.919	180.038	227.749	77.7148	149.723
locus_tag=F7O84_RS02225]	6666666.269962.peg.2489	1635	525.992	127.917	590.469	695.325	675.933	402.578	360.61	431.037
locus_tag=F7O84_RS11460]	6666666.269962.peg.249	195	1.52443	0.695814	0	1.52379	0.96205	2.89739	2.10702	1.65631
locus_tag=F7O84_RS02230]	6666666.269962.peg.2490	879	263.436	23.3588	260.516	277.026	319.923	255.821	250.541	216.791
locus_tag=F7O84_RS02235]	6666666.269962.peg.2491	246	200.24	31.5166	173.146	184.806	292.839	163.067	185.392	202.192
locus_tag=F7O84_RS02240]	6666666.269962.peg.2492	621	178.457	20.926	153.94	140.196	187.298	216.535	186.578	186.195
locus_tag=F7O84_RS02245]	6666666.269962.peg.2493	249	1143.36	221.015	1098.41	906.933	761.701	1390.92	1529.62	1172.59
locus_tag=F7O84_RS02250]	6666666.269962.peg.2494	1839	813.044	153.204	685.236	671.109	637.268	1048.26	798.95	1037.44
locus_tag=F7O84_RS02255]	6666666.269962.peg.2495	264	610.01	325.869	808.259	991.029	1008.35	293.197	200.766	358.46
locus_tag=F7O84_RS02260]	6666666.269962.peg.2496	1836	2.06434	0.780083	1.26813	1.05197	1.53268	3.38503	2.68542	2.46282
locus_tag=F7O84_RS02265]	6666666.269962.peg.2497	1758	1.5888	0.465104	1.4023	1.26766	1.70739	2.24968	0.701142	2.20465
locus_tag=F7O84_RS02270]	6666666.269962.peg.2498	972	0.981058	0.741627	0.986322	1.2228	0.386008	0	2.95894	0.332285
locus_tag=F7O84_RS02275]	6666666.269962.peg.2499	1296	3.04983	0.492931	3.91006	3.66839	2.89506	2.6157	2.2192	2.99057
locus_tag=F7O84_RS14690]	6666666.269962.peg.25	819	1.7413	0.756495	0.668903	0.544212	2.2906	2.06957	2.50836	2.36616
locus_tag=F7O84_RS11465]	6666666.269962.peg.250	519	1.15695	0.917242	0.791664	2.57636	1.08439	0	0	2.48926
locus_tag=F7O84_RS02280]	6666666.269962.peg.2500	1812	437.517	71.1304	530.372	512.697	482.873	335.503	397.718	365.939
locus_tag=F7O84_RS02285]	6666666.269962.peg.2501	1146	34.3806	8.82326	22.5873	25.9284	28.1563	47.8222	39.7962	41.9932
locus_tag=F7O84_RS02290]	6666666.269962.peg.2502	426	536.997	31.439	495.427	514.066	600.231	511.941	568.08	532.237
locus_tag=F7O84_RS02295]	6666666.269962.peg.2503	771	10.6156	1.8844	11.724	10.5984	9.73281	5.86243	12.7897	12.9863
locus_tag=F7O84_RS02300]	6666666.269962.peg.2504	906	8.6975	2.96971	6.50021	6.39539	6.21192	14.9667	11.3375	6.77334
locus_tag=F7O84_RS02305]	6666666.269962.peg.2505	1905	41.6121	7.79903	30.483	31.6637	39.2926	50.1226	50.469	47.6419
locus_tag=F7O84_RS12995]	6666666.269962.peg.2506	129	0.676705	0.902273	0	1.1517	2.90852	0	0	0
locus_tag=F7O84_RS02310]	6666666.269962.peg.2507	1293	144.131	11.1376	143.419	141.101	119.408	146.819	139.181	174.855
locus_tag=F7O84_RS02315]	6666666.269962.peg.2508	351	193.034	62.3451	135.007	128.253	128.808	284.91	223.578	257.649
locus_tag=F7O84_RS02320]	6666666.269962.peg.2509	1518	3.99317	1.89166	2.7969	2.64255	0.865085	5.95512	5.95463	5.74473
locus_tag=F7O84_RS11470]	6666666.269962.peg.251	957	0.854746	0.387549	0.429335	0.776227	0.196029	1.18076	0.858661	1.68747
locus_tag=F7O84_RS02325]	6666666.269962.peg.2510	1482	5.04949	3.21634	2.40277	1.70424	1.39244	10.6746	6.93099	7.19189
locus_tag=F7O84_RS02330]	6666666.269962.peg.2511	792	7.46034	2.92085	6.22536	4.8773	2.84242	7.13374	13.4881	10.1951
locus_tag=F7O84_RS02335]	6666666.269962.peg.2512	1725	3.42427	2.18665	1.11154	0.861275	1.74006	5.56804	7.14555	4.11918
locus_tag=F7O84_RS02340]	6666666.269962.peg.2513	1035	6.07212	3.34593	1.72024	3.01446	3.44386	9.28006	9.92438	9.04972
locus_tag=F7O84_RS02345]	6666666.269962.peg.2514	1392	17.5747	7.77199	9.1502	9.07216	11.1859	27.6002	23.6132	24.8269
locus_tag=F7O84_RS02350]	6666666.269962.peg.2515	882	3.09855	0.981078	1.39753	2.18981	2.76508	4.48406	3.72671	4.02811
locus_tag=F7O84_RS02355]	6666666.269962.peg.2516	843	1.02449	0.563104	0.487395	1.05744	0.667615	2.68086	0.487389	0.766267
locus_tag=F7O84_RS02360]	6666666.269962.peg.2517	1248	2.71436	1.09122	1.75587	1.30951	2.25481	2.26359	5.59678	3.10559
locus_tag=F7O84_RS02365]	6666666.269962.peg.2518	681	6.50797	1.67078	5.43005	6.32677	2.75477	10.7855	6.63666	7.11413
locus_tag=F7O84_RS02370]	6666666.269962.peg.2519	1968	4.35474	0.73123	3.20125	4.00112	4.00366	4.01925	6.47203	4.43115
locus_tag=F7O84_RS11475]	6666666.269962.peg.252	240	89.8394	25.9591	59.9191	97.8085	82.0749	127.123	49.6467	122.464
locus_tag=F7O84_RS02375]	6666666.269962.peg.2520	3066	6.63273	1.64819	5.44973	5.03955	5.38447	5.71257	9.7826	8.42743
locus_tag=F7O84_RS02380]	6666666.269962.peg.2521	1707	13.8964	2.48693	11.7943	13.3165	11.4296	11.5845	17.0895	18.1642
locus_tag=F7O84_RS02385]	6666666.269962.peg.2522	333	6.1503	1.99979	9.87084	6.69234	7.88708	1.69667	4.93537	5.81948
locus_tag=F7O84_RS02390]	6666666.269962.peg.2523	591	0.848144	0.587842	0.463478	1.00555	0.317428	1.91199	1.39042	0
locus_tag=F7O84_RS02395]	6666666.269962.peg.2524	363	2.54263	1.78876	1.50918	1.22785	2.06722	7.78226	0	2.66927
locus_tag=F7O84_RS02400]	6666666.269962.peg.2525	366	2.54894	2.03437	3.36782	7.30672	3.07541	1.54369	0	0
locus_tag=F7O84_RS02405]	6666666.269962.peg.2526	1563	39.7164	7.66147	45.0393	52.565	44.5295	32.5331	28.9159	34.7158
locus_tag=F7O84_RS02410]	6666666.269962.peg.2527	1116	57.4127	3.96999	57.8021	56.8453	59.8437	46.0701	65.1648	58.7502
locus_tag=F7O84_RS02415]	6666666.269962.peg.2528	2622	11.7797	2.84283	8.7231	9.85933	8.22806	14.2218	15.3567	14.289
locus_tag=F7O84_RS02420]	6666666.269962.peg.2529	141	592.107	368.247	255.46	258.153	263.438	1370.41	486.632	918.55
locus_tag=F7O84_RS11480]	6666666.269962.peg.253	738	30.042	6.17862	37.3015	35.6326	30.7582	23.7327	17.8155	35.0115
locus_tag=F7O84_RS02425]	6666666.269962.peg.2530	1413	170.355	24.1619	195.211	188.525	199.814	141.148	154.112	143.319
locus_tag=F7O84_RS02430]	6666666.269962.peg.2531	2148	585.025	82.6424	711.633	674.859	616.512	458.99	539.027	509.132
locus_tag=F7O84_RS02435]	6666666.269962.peg.2532	1191	9.81242	3.20114	12.3044	13.3476	13.3887	7.11577	6.20961	6.50844
locus_tag=F7O84_RS02440]	6666666.269962.peg.2533	705	289.092	72.5143	204.563	242.98	233.103	399.902	258.177	395.824
locus_tag=F7O84_RS02445]	6666666.269962.peg.2534	1470	233.921	41.9191	201.524	191.221	183.261	283.649	257.143	286.728
locus_tag=F7O84_RS02450]	6666666.269962.peg.2535	2226	232.888	14.0388	235.277	205.635	218.024	247.723	256.193	234.473
locus_tag=F7O84_RS02455]	6666666.269962.peg.2536	474	62.5738	14.0155	47.6752	46.3889	54.2219	91.7814	75.4127	59.9628
locus_tag=F7O84_RS02460]	6666666.269962.peg.2537	933	103.234	5.58171	94.9751	94.7472	110.388	110.818	103.928	104.545
locus_tag=F7O84_RS02465]	6666666.269962.peg.2538	714	303.003	27.2004	311.128	323.982	346.035	251.635	312.468	272.77
locus_tag=F7O84_RS02470]	6666666.269962.peg.2539	1356	32.5147	4.73637	32.3204	28.5964	26.1478	45.416	28.7851	33.8225
locus_tag=F7O84_RS11485]	6666666.269962.peg.254	690	86.0841	9.28042	91.1068	97.1087	97.8782	82.7017	75.6238	72.0857
locus_tag=F7O84_RS02475]	6666666.269962.peg.2540	1053	23.8587	2.98314	21.2005	22.7158	26.1892	28.9739	25.3623	18.7102
locus_tag=F7O84_RS02480]	6666666.269962.peg.2541	744	45.602	11.0649	36.2644	30.5527	36.8139	71.3834	53.0154	45.582
locus_tag=F7O84_RS02485]	6666666.269962.peg.2542	2082	209.115	29.3422	201.095	155.349	185.978	266.485	239.772	206.013
locus_tag=F7O84_RS02490]	6666666.269962.peg.2543	879	185.18	20.8035	187.129	189.811	210.863	215.327	139.294	168.656
locus_tag=F7O84_RS02495]	6666666.269962.peg.2544	666	170.838	39.9838	158.55	117.116	116.898	183.241	225.176	224.05
locus_tag=F7O84_RS02500]	6666666.269962.peg.2545	651	42.6342	4.86026	35.344	44.9589	42.9376	52.073	35.3436	45.1479
locus_tag=F7O84_RS02505]	6666666.269962.peg.2546	1098	47.9587	9.4142	40.0396	38.4279	49.5482	74.6119	40.4134	44.7114
locus_tag=F7O84_RS02510]	6666666.269962.peg.2547	855	76.1333	11.4319	75.1266	56.6477	77.0147	106.39	79.2906	62.3297
locus_tag=F7O84_RS02515]	6666666.269962.peg.2548	180	159.185	45.1673	101.958	139.491	136.531	238.552	123.261	215.321
locus_tag=F7O84_RS02520]	6666666.269962.peg.2549	432	948.528	528.315	2309.26	1172.74	844.199	438.13	502.174	424.661
locus_tag=F7O84_RS11490]	6666666.269962.peg.255	1056	102.893	40.5035	60.9566	55.151	71.0605	149.273	166.527	114.389
locus_tag=F7O84_RS02525]	6666666.269962.peg.2550	939	206.14	24.9185	196.613	183.062	184.603	256.924	185.526	230.111
locus_tag=F7O84_RS02530]	6666666.269962.peg.2551	516	310.58	38.1832	343.987	349.542	331.572	331.768	229.322	277.288
locus_tag=F7O84_RS02535]	6666666.269962.peg.2552	2067	56.5597	10.1297	45.9839	50.9608	70.8832	69.1548	60.0303	42.3454
locus_tag=F7O84_RS02540]	6666666.269962.peg.2553	1932	71.4984	4.08491	76.5603	73.2853	76.9043	66.9685	68.9035	66.3683
locus_tag=F7O84_RS02545]	6666666.269962.peg.2554	957	92.0486	15.9134	103.47	107.896	112.521	76.7492	65.2582	86.3984
locus_tag=F7O84_RS02550]	6666666.269962.peg.2555	1356	178.984	26.1389	191.095	210.803	213.471	147.081	152.106	159.347
locus_tag=F7O84_RS02555]	6666666.269962.peg.2556	1119	96.3368	17.4402	104.524	118.829	112.828	101.486	58.3809	81.972
locus_tag=F7O84_RS02560]	6666666.269962.peg.2557	1251	62.1969	10.5561	54.5204	45.3667	55.0353	84.9069	67.0003	66.3519
locus_tag=F7O84_RS02565]	6666666.269962.peg.2558	723	27.7656	6.24109	20.4584	24.0424	22.8337	33.6026	25.0045	40.6519
locus_tag=F7O84_RS02570]	6666666.269962.peg.2559	1179	1129.54	156.083	1163.74	1234.81	1458.31	887.502	1074.05	958.808
locus_tag=F7O84_RS11495]	6666666.269962.peg.256	147	2.7489	1.8326	2.79506	7.07476	3.82857	0	2.79503	0
locus_tag=F7O84_RS02575]	6666666.269962.peg.2560	855	2.32573	1.42614	0.480554	1.73766	2.8524	4.62566	0.480549	3.77756
locus_tag=F7O84_RS02580]	6666666.269962.peg.2561	741	8.41337	3.07048	4.99037	6.21548	6.58245	12.962	6.65375	13.0762
locus_tag=F7O84_RS02585]	6666666.269962.peg.2562	1620	3.41551	1.427	2.02901	2.65958	2.66345	7.32397	2.02898	3.78805
locus_tag=F7O84_RS02590]	6666666.269962.peg.2563	1473	3.44861	1.57364	1.95256	2.1181	1.65567	7.67131	3.3472	3.94682
locus_tag=F7O84_RS02595]	6666666.269962.peg.2564	1083	20.0366	8.28411	11.7609	9.46567	14.031	20.346	37.1793	27.437
locus_tag=F7O84_RS02600]	6666666.269962.peg.2565	1521	3.78362	1.77118	2.70134	1.8559	1.48008	5.20045	5.94288	5.52105
locus_tag=F7O84_RS02605]	6666666.269962.peg.2566	1053	3.49561	0.751871	2.47122	4.23276	3.02868	4.82899	2.73132	3.6807
locus_tag=F7O84_RS02610]	6666666.269962.peg.2567	1029	3.65733	1.42262	2.92816	1.58821	2.18775	4.94162	5.59006	4.70818
locus_tag=F7O84_RS02615]	6666666.269962.peg.2568	1071	14.7504	4.96487	9.97452	11.93	12.6118	26.9044	9.59079	17.4911
locus_tag=F7O84_RS02070]	6666666.269962.peg.2569	252	62.5175	14.9418	57.0658	53.6502	32.0111	80.7131	79.8913	71.7736
locus_tag=F7O84_RS11500]	6666666.269962.peg.257	876	11.0364	4.79852	15.0091	18.1472	14.3484	9.02955	5.62835	4.0557
locus_tag=F7O84_RS02065]	6666666.269962.peg.2570	1113	17.4973	5.54585	19.3193	21.8917	26.1258	19.2899	8.49056	9.86646
locus_tag=F7O84_RS02060]	6666666.269962.peg.2571	1350	21.765	1.62537	24.1452	22.0104	22.0951	20.0886	18.5652	23.6853
locus_tag=F7O84_RS02055]	6666666.269962.peg.2572	540	416.642	35.5793	464.135	461.117	408.551	362.013	431.413	372.625
locus_tag=F7O84_RS02050]	6666666.269962.peg.2573	228	444.306	138.361	310.558	359.044	269.058	678.981	423.484	624.714
locus_tag=F7O84_RS02045]	6666666.269962.peg.2574	987	22.856	8.14002	15.4026	14.3	14.4454	38.353	27.4745	27.1605
locus_tag=F7O84_RS02040]	6666666.269962.peg.2575	975	1257.55	254.381	1339.1	1544.67	1652.03	830.393	1166.45	1012.67
locus_tag=F7O84_RS02035]	6666666.269962.peg.2576	387	140.12	41.1349	96.2598	100.582	108.585	205.85	131.648	197.795
locus_tag=F7O84_RS02030]	6666666.269962.peg.2577	1368	210.882	3.33728	201.532	215.578	211.05	210.22	213.244	213.668
locus_tag=F7O84_RS02025]	6666666.269962.peg.2578	759	113.478	23.9956	119.996	133.498	158.928	93.7931	96.3567	78.2985
locus_tag=F7O84_RS02020]	6666666.269962.peg.2579	717	38.1764	3.94008	34.7648	45.3791	35.0605	37.8237	33.2363	42.7939
locus_tag=F7O84_RS11505]	6666666.269962.peg.258	999	51.8534	8.0538	47.7091	58.7439	61.5943	59.3835	34.5476	49.1423
locus_tag=F7O84_RS02015]	6666666.269962.peg.2580	327	11.2181	4.18636	11.3084	16.8107	15.4899	13.8224	0	9.87711
locus_tag=F7O84_RS02010]	6666666.269962.peg.2581	594	391.498	41.3692	385.511	448.211	458.893	350.029	353.458	352.887
locus_tag=F7O84_RS02005]	6666666.269962.peg.2582	768	174.358	10.725	190.457	180.876	151.448	183.917	173.335	166.117
locus_tag=F7O84_RS02000]	6666666.269962.peg.2583	393	19.4554	9.00946	13.9397	13.9875	12.4112	33.0657	10.4547	32.8734
locus_tag=F7O84_RS01995]	6666666.269962.peg.2584	981	83.2852	26.2268	100.38	107.679	120.477	68.5362	47.3275	55.3118
locus_tag=F7O84_RS01990]	6666666.269962.peg.2585	1113	26.4201	9.06224	33.1012	30.7018	42.644	19.2899	16.2428	16.5408
locus_tag=F7O84_RS01985]	6666666.269962.peg.2586	1539	32.288	6.46633	44.9407	34.7532	36.5692	28.6351	23.2265	25.6035
locus_tag=F7O84_RS01980]	6666666.269962.peg.2587	1254	657.131	254.078	950.623	889.287	893.717	361.793	458.706	388.659
locus_tag=F7O84_RS01975]	6666666.269962.peg.2588	2169	87.4868	25.1796	109.743	115.212	113.044	62.7769	63.8372	60.3077
locus_tag=F7O84_RS01970]	6666666.269962.peg.2589	513	277.743	43.6524	214.38	231.688	386.902	263.222	299.542	270.725
locus_tag=F7O84_RS11510]	6666666.269962.peg.259	900	104.533	3.58021	105.61	106.805	99.6364	107.348	109.109	98.6887
locus_tag=F7O84_RS01965]	6666666.269962.peg.2590	891	47.1917	17.2153	53.6457	68.1988	71.3764	45.0218	18.4453	26.462
locus_tag=F7O84_RS01960]	6666666.269962.peg.2591	681	33.356	3.47677	33.9881	27.925	34.7101	41.4825	28.3566	33.6735
locus_tag=F7O84_RS01955]	6666666.269962.peg.2592	1053	74.1599	31.8127	99.3692	106.666	111.883	41.8512	48.3835	36.807
locus_tag=F7O84_RS01950]	6666666.269962.peg.2593	717	60.5618	20.1386	69.9116	74.5958	97.5938	48.0676	38.9667	34.2351
locus_tag=F7O84_RS01945]	6666666.269962.peg.2594	906	21.7887	4.42314	17.2331	21.9739	22.3629	34.2986	16.3259	18.5376
locus_tag=F7O84_RS01940]	6666666.269962.peg.2595	1005	70.7289	30.4528	43.7448	37.6968	39.3866	112.436	104.659	86.4497
locus_tag=F7O84_RS01935]	6666666.269962.peg.2596	831	77.0787	23.0904	44.9934	56.1383	62.759	135.979	75.153	87.4498
locus_tag=F7O84_RS01930]	6666666.269962.peg.2597	1506	90.8829	40.6863	49.1084	58.2047	56.6786	174.075	77.4813	129.75
locus_tag=F7O84_RS01925]	6666666.269962.peg.2598	357	5161.6	4015.24	1048.48	1523.57	1504.48	11937.6	4524.17	10431.3
locus_tag=F7O84_RS01920]	6666666.269962.peg.2599	1293	3842.67	2476.92	1504.21	1289.44	1303.62	6301.87	6645.41	6011.5
locus_tag=F7O84_RS14685]	6666666.269962.peg.26	936	2.9742	1.06959	2.92645	1.74601	2.2047	1.81087	5.70652	3.45066
locus_tag=F7O84_RS11515]	6666666.269962.peg.260	459	109.371	21.5619	161.724	121.704	105.448	86.1643	80.5626	100.624
locus_tag=F7O84_RS01915]	6666666.269962.peg.2600	522	6645.91	4040.66	2520.86	2578.63	2716.24	11066	10296.9	10696.7
locus_tag=F7O84_RS01910]	6666666.269962.peg.2601	1077	25223.5	15891	10561.4	9337.01	8099.19	39120.8	42015.9	42206.8
locus_tag=F7O84_RS01905]	6666666.269962.peg.2602	933	117.595	23.4156	91.3053	104.461	96.9165	156.236	107.451	149.201
locus_tag=F7O84_RS01900]	6666666.269962.peg.2603	1956	72.1018	19.2429	94.3861	91.6029	88.0453	60.0809	47.4726	51.0231
locus_tag=F7O84_RS01895]	6666666.269962.peg.2604	783	59.502	10.2241	73.8138	71.1542	64.2104	56.2827	46.1769	45.3741
locus_tag=F7O84_RS01890]	6666666.269962.peg.2605	432	3.7117	1.20634	2.85329	5.15868	5.64537	3.92355	0.951086	3.73821
locus_tag=F7O84_RS01885]	6666666.269962.peg.2606	1203	1506.8	200.496	1477.85	1729.12	1885.98	1191.04	1495.25	1261.59
locus_tag=F7O84_RS01875]	6666666.269962.peg.2607	897	3.04437	0.818735	3.35906	3.3126	4.18283	3.77921	1.83219	1.80034
locus_tag=F7O84_RS01870]	6666666.269962.peg.2608	558	808.658	110.992	785.176	913.785	1036.51	803.949	594.214	718.315
locus_tag=F7O84_RS01865]	6666666.269962.peg.2609	507	17.6126	6.33657	19.9899	23.736	28.1215	14.487	4.05197	15.2891
locus_tag=F7O84_RS11520]	6666666.269962.peg.261	642	12.9564	2.80587	9.38652	12.4965	12.5651	13.2007	8.95977	21.1296
locus_tag=F7O84_RS01860]	6666666.269962.peg.2610	909	19.6074	6.11218	22.4496	26.6412	28.0677	19.2681	9.49203	11.7254
locus_tag=F7O84_RS01855]	6666666.269962.peg.2611	867	212.462	36.3534	233.634	238.877	273.935	166.826	185.294	176.206
locus_tag=F7O84_RS01850]	6666666.269962.peg.2612	1014	1173.12	592.684	598.211	557.357	585.741	1853.78	1608.63	1835.01
locus_tag=F7O84_RS01845]	6666666.269962.peg.2613	1062	22007.4	8499.52	15413.7	13353.7	11756.4	27400	33852.2	30268.7
locus_tag=F7O84_RS01840]	6666666.269962.peg.2614	1020	1357.83	279.025	1093.51	991.194	1151.72	1875	1472.28	1563.29
locus_tag=F7O84_RS01835]	6666666.269962.peg.2615	1530	1222.11	289.047	1053.68	883.166	862.346	1663.96	1326.6	1542.92
locus_tag=F7O84_RS01830]	6666666.269962.peg.2616	834	53.8066	13.0818	73.8981	62.8839	63.8829	46.7439	33.9928	41.4377
locus_tag=F7O84_RS01825]	6666666.269962.peg.2617	1398	79.8205	30.0547	104.531	108.08	117.015	50.922	47.3176	51.0579
locus_tag=F7O84_RS01820]	6666666.269962.peg.2618	1125	1667.58	850.999	2438.58	2537.44	2579.71	799.024	771.339	879.371
locus_tag=F7O84_RS01815]	6666666.269962.peg.2619	1203	1173.11	444.798	1754.5	1612.16	1487.08	699.782	748.991	736.172
locus_tag=F7O84_RS11525]	6666666.269962.peg.262	807	5.52484	0.831959	6.95821	4.78664	6.50904	4.20068	5.09132	5.60315
locus_tag=F7O84_RS01810]	6666666.269962.peg.2620	852	404.865	147.055	581.106	540.92	533.735	263.928	262.339	247.164
locus_tag=F7O84_RS01805]	6666666.269962.peg.2621	1446	892.172	512.247	1358.69	1366.62	1487.95	355.953	413.711	370.111
locus_tag=F7O84_RS01800]	6666666.269962.peg.2622	750	149.532	35.4336	177.132	180.661	197.105	122.792	92.0347	127.47
locus_tag=F7O84_RS01795]	6666666.269962.peg.2623	453	152.479	9.61672	172.633	155.457	158.197	145.925	141.491	141.171
locus_tag=F7O84_RS01790]	6666666.269962.peg.2624	1701	5.23594	1.03855	3.54271	4.71651	4.63209	7.30736	6.28019	4.93681
locus_tag=F7O84_RS01785]	6666666.269962.peg.2625	315	123.537	11.1943	127.393	126.402	136.978	91.4749	136.956	122.015
locus_tag=F7O84_RS01780]	6666666.269962.peg.2626	699	88.7336	10.7638	90.1296	108.611	98.765	89.7197	78.1768	66.999
locus_tag=F7O84_RS01775]	6666666.269962.peg.2627	789	21.244	11.3167	29.5093	34.6475	33.5254	12.8895	6.24896	10.6432
locus_tag=F7O84_RS01770]	6666666.269962.peg.2628	1557	364.787	60.7209	392.489	413.648	470.385	263.082	345.426	303.69
locus_tag=F7O84_RS01765]	6666666.269962.peg.2629	744	78.424	29.0324	94.2506	106.835	121.284	50.8796	53.0154	44.2797
locus_tag=F7O84_RS11530]	6666666.269962.peg.263	984	12.7238	1.78258	13.3617	14.4946	15.4427	10.9094	12.9441	9.19053
locus_tag=F7O84_RS01760]	6666666.269962.peg.2630	606	73.3969	14.3529	64.4109	92.4272	78.631	82.9774	39.3241	82.6107
locus_tag=F7O84_RS01755]	6666666.269962.peg.2631	720	115.211	15.3875	122.882	125.665	126.89	131.047	69.0489	115.735
locus_tag=F7O84_RS01750]	6666666.269962.peg.2632	648	62.0238	6.5332	69.5357	57.5479	56.7432	74.1116	53.8949	60.3098
locus_tag=F7O84_RS01745]	6666666.269962.peg.2633	1455	2916.52	1409.5	4232.05	4457.91	4288.11	1381.61	1703.91	1435.55
locus_tag=F7O84_RS01740]	6666666.269962.peg.2634	492	41.0532	10.4445	45.3743	47.1075	40.0366	62.0113	24.2179	27.5716
locus_tag=F7O84_RS01735]	6666666.269962.peg.2635	672	64.7746	17.028	49.1173	75.8326	74.8166	87.4392	29.3478	72.0941
locus_tag=F7O84_RS01730]	6666666.269962.peg.2636	777	8.07503	2.4868	8.81325	9.17806	11.5892	10.18	3.70153	4.98813
locus_tag=F7O84_RS01725]	6666666.269962.peg.2637	804	22.0986	4.93866	27.085	28.827	25.2	14.0545	15.3309	22.0945
locus_tag=F7O84_RS01720]	6666666.269962.peg.2638	801	63.5792	26.0413	85.8338	94.966	88.0618	36.6786	36.4191	39.5158
locus_tag=F7O84_RS01715]	6666666.269962.peg.2639	186	1.38134	1.04514	2.209	1.59753	1.0086	0	0	3.47292
locus_tag=F7O84_RS11535]	6666666.269962.peg.264	309	30.3912	4.78238	33.6854	31.2526	18.2136	31.0837	39.8902	28.2217
locus_tag=F7O84_RS01710]	6666666.269962.peg.2640	1623	744.089	59.6302	738.29	685.362	629.725	811.11	836.675	763.374
locus_tag=F7O84_RS01705]	6666666.269962.peg.2641	285	570.133	64.4368	593.004	620.866	689.841	531.291	513.226	472.573
locus_tag=F7O84_RS01700]	6666666.269962.peg.2642	906	24.5472	5.21015	23.5822	21.9739	33.5443	31.1806	16.3259	20.6765
locus_tag=F7O84_RS01695]	6666666.269962.peg.2643	1005	103.75	12.5372	104.115	118.56	126.187	102.879	75.6327	95.1268
locus_tag=F7O84_RS01690]	6666666.269962.peg.2644	690	41.8233	9.76188	52.5998	49.9539	52.2017	32.7532	33.9414	29.4896
locus_tag=F7O84_RS01685]	6666666.269962.peg.2645	552	23.2322	4.28479	23.8188	29.8755	28.5478	23.5413	14.8866	18.7236
locus_tag=F7O84_RS01680]	6666666.269962.peg.2646	1989	60.4456	4.51056	53.3647	60.7277	58.6662	72.4349	55.7741	61.7058
locus_tag=F7O84_RS01675]	6666666.269962.peg.2647	252	4.6385	3.35683	5.43484	5.89563	12.6555	0	0	3.84502
locus_tag=F7O84_RS01675]	6666666.269962.peg.2648	156	18.1899	6.04288	14.047	25.714	25.2538	21.7305	7.90133	14.4928
locus_tag=F7O84_RS01670]	6666666.269962.peg.2649	438	7.07909	2.30653	7.19185	9.15842	8.5662	10.3195	2.81417	4.4244
locus_tag=F7O84_RS11540]	6666666.269962.peg.265	2694	40.0496	11.4943	46.0593	51.1226	57.4498	26.2153	30.1975	29.253
locus_tag=F7O84_RS01665]	6666666.269962.peg.2650	915	14.5251	2.60759	21.4043	14.4511	14.5569	15.4369	12.124	9.17761
locus_tag=F7O84_RS01660]	6666666.269962.peg.2651	939	3.37801	0.554082	3.64638	3.32265	2.39744	4.21187	3.93804	2.7517
locus_tag=F7O84_RS01655]	6666666.269962.peg.2652	1485	108.045	18.4638	131.701	112.653	135.173	93.2141	100.711	74.8186
locus_tag=F7O84_RS01650]	6666666.269962.peg.2653	4557	82.1164	15.5515	96.715	96.9926	99.2958	68.9347	65.9086	64.8514
locus_tag=F7O84_RS01645]	6666666.269962.peg.2654	885	46.4327	8.67059	34.3555	49.6912	48.1188	58.0952	32.4981	55.8375
locus_tag=F7O84_RS01640]	6666666.269962.peg.2655	906	81.7818	16.4722	85.8632	112.821	96.0776	65.4792	54.8733	75.5762
locus_tag=F7O84_RS01635]	6666666.269962.peg.2656	3201	1010.65	212.269	1214.61	1219.42	1234.72	750.675	848.565	795.9
locus_tag=F7O84_RS01630]	6666666.269962.peg.2657	1086	463.121	49.8939	565.739	486.341	486.965	442.213	409.356	388.113
locus_tag=F7O84_RS01625]	6666666.269962.peg.2658	1266	99.8276	26.3488	134.362	117.471	126.697	70.5124	83.0826	66.8413
locus_tag=F7O84_RS01620]	6666666.269962.peg.2659	195	2.99513	1.01136	4.21409	2.28569	4.81025	2.89739	2.10702	1.65631
locus_tag=F7O84_RS11545]	6666666.269962.peg.266	1344	31.5529	1.88543	30.7748	31.947	35.8729	31.9489	32.0992	26.6748
locus_tag=F7O84_RS01615]	6666666.269962.peg.2660	1071	249.512	25.3821	259.721	205.445	276.408	263.768	274.296	217.432
locus_tag=F7O84_RS01610]	6666666.269962.peg.2661	492	106.639	8.08376	125.823	100.556	111.34	90.7202	104.388	107.004
locus_tag=F7O84_RS01605]	6666666.269962.peg.2662	849	59.3459	4.48913	60.8164	47.7734	57.4511	67.8789	62.4289	59.7268
locus_tag=F7O84_RS01600]	6666666.269962.peg.2663	759	160.378	22.5908	158.25	186.349	176.724	173.443	94.7327	172.767
locus_tag=F7O84_RS01595]	6666666.269962.peg.2664	753	2806.79	145.213	3073.28	2975.94	2659.03	2635.88	2708.57	2788.02
locus_tag=F7O84_RS01590]	6666666.269962.peg.2665	873	170.286	21.439	163	142.954	195.766	177.976	201.434	140.588
locus_tag=F7O84_RS01580]	6666666.269962.peg.2666	771	54.6381	24.2337	66.4361	76.501	93.6783	37.373	18.6517	35.1886
locus_tag=F7O84_RS01575]	6666666.269962.peg.2667	678	348.497	114.602	201.195	206.639	293.851	597.491	387.841	403.965
locus_tag=F7O84_RS01570]	6666666.269962.peg.2668	744	165.705	20.0713	139.167	139.384	158.35	204.278	168.987	184.065
locus_tag=F7O84_RS01565]	6666666.269962.peg.2669	1377	286.86	26.9852	255.317	240.388	283.92	321.68	326.428	293.428
locus_tag=F7O84_RS11550]	6666666.269962.peg.267	1365	86.9572	11.5441	95.5193	98.3936	100.053	64.9844	88.4949	74.2975
locus_tag=F7O84_RS01560]	6666666.269962.peg.2670	1647	431.881	20.6694	454.946	442.643	458.122	401.703	433.82	400.05
locus_tag=F7O84_RS01555]	6666666.269962.peg.2671	759	63.0173	8.27355	48.1789	61.268	61.5446	87.838	62.2529	57.0217
locus_tag=F7O84_RS01550]	6666666.269962.peg.2672	1035	26.4272	9.21254	16.6731	20.6706	20.4819	48.038	20.2457	32.4542
locus_tag=F7O84_RS03025]	6666666.269962.peg.2673	135	52.1682	15.6708	25.3626	52.8249	31.9615	66.962	76.0869	59.8114
locus_tag=F7O84_RS01545]	6666666.269962.peg.2674	1239	558.589	22.8385	541.973	535.883	558.106	529.879	625.755	559.939
locus_tag=F7O84_RS01540]	6666666.269962.peg.2675	1203	21.6844	3.33749	19.1263	18.1544	22.9237	25.8309	17.7599	26.311
locus_tag=F7O84_RS01535]	6666666.269962.peg.2676	879	12.6391	4.59754	7.94636	9.63423	13.8726	23.1396	6.54399	14.6977
locus_tag=F7O84_RS01530]	6666666.269962.peg.2677	1416	32.544	3.71378	30.2739	27.0699	29.1469	35.5115	38.5915	34.6703
locus_tag=F7O84_RS01525]	6666666.269962.peg.2678	1875	11.694	3.45773	9.71488	7.28983	7.7041	15.0664	14.0243	16.3644
locus_tag=F7O84_RS02120]	6666666.269962.peg.2679	216	4.86802	3.1507	2.53626	6.19041	12.1592	2.6157	5.70652	0
locus_tag=F7O84_RS11555]	6666666.269962.peg.268	1599	30.3896	3.19023	33.8326	27.0381	29.9174	31.4473	35.4596	24.6427
locus_tag=F7O84_RS02115]	6666666.269962.peg.2680	366	4.43852	1.83641	3.36782	5.27707	8.20109	0	4.49037	5.29478
locus_tag=F7O84_RS00110]	6666666.269962.peg.2681	804	34.5452	4.09284	29.2994	29.7509	37.8	43.569	32.706	34.146
locus_tag=F7O84_RS00105]	6666666.269962.peg.2682	1020	89.5274	24.2724	66.8677	61.0302	67.867	120.753	119.635	101.011
locus_tag=F7O84_RS00100]	6666666.269962.peg.2683	591	130.839	25.7141	87.1339	105.08	123.162	195.979	134.871	138.811
locus_tag=F7O84_RS00095]	6666666.269962.peg.2684	918	71.1337	28.6116	48.0397	41.1076	38.4191	107.09	103.836	88.3097
locus_tag=F7O84_RS00090]	6666666.269962.peg.2685	249	28.2203	4.9565	21.4512	26.85	32.3968	24.9595	24.7512	38.9134
locus_tag=F7O84_RS05480]	6666666.269962.peg.2686	138	28.4152	8.31284	26.7961	43.0637	20.3913	20.4707	38.7051	21.064
locus_tag=F7O84_RS00085]	6666666.269962.peg.2687	453	126.194	11.5901	151.47	132.171	110.986	129.711	125.165	107.66
locus_tag=F7O84_RS00080]	6666666.269962.peg.2688	702	171.076	58.7322	223.581	231.744	234.099	100.604	122.324	114.102
locus_tag=F7O84_RS00075]	6666666.269962.peg.2689	441	144.604	27.1913	187.269	179.227	148.889	112.742	126.708	112.787
locus_tag=F7O84_RS11560]	6666666.269962.peg.269	384	18.1081	5.41277	26.0363	22.0533	22.4729	13.242	13.9096	10.9343
locus_tag=F7O84_RS00070]	6666666.269962.peg.2690	501	29.0293	8.98104	32.5309	41.5165	39.6918	29.3209	9.84118	21.2742
locus_tag=F7O84_RS00065]	6666666.269962.peg.2691	1230	396.61	98.5822	316.562	292.308	285.213	506.196	487.03	492.35
locus_tag=F7O84_RS00060]	6666666.269962.peg.2692	1611	223.753	25.9481	206.84	191.638	194.936	276.709	236.422	235.971
locus_tag=F7O84_RS00055]	6666666.269962.peg.2693	702	94.4552	8.9814	87.0131	90.3694	96.7395	119.115	88.3779	85.1162
locus_tag=F7O84_RS00050]	6666666.269962.peg.2694	621	389.576	123.384	259.58	290.441	327.167	606.843	310.964	542.463
locus_tag=F7O84_RS00045]	6666666.269962.peg.2695	1146	709.634	57.8514	645.232	748.295	844.527	653.241	695.179	671.328
locus_tag=F7O84_RS00040]	6666666.269962.peg.2696	1755	981.662	35.4698	949.028	948.731	973.595	989.299	1080.43	948.884
locus_tag=F7O84_RS00035]	6666666.269962.peg.2697	882	330.516	61.2066	286.649	360.644	404.552	409.971	231.987	289.292
locus_tag=F7O84_RS00030]	6666666.269962.peg.2698	972	194.618	42.3903	198.11	254.342	249.747	203.444	98.913	163.152
locus_tag=F7O84_RS00025]	6666666.269962.peg.2699	2244	1357.27	275.984	1087	1232.52	1182.11	1837.48	1099.5	1705.01
locus_tag=F7O84_RS14680]	6666666.269962.peg.27	1455	4.70408	2.38188	2.63562	2.65486	1.67615	8.93114	6.77723	5.54951
locus_tag=F7O84_RS11565]	6666666.269962.peg.270	330	16.6428	5.70159	17.431	7.6536	8.52727	18.8331	24.9012	22.5108
locus_tag=F7O84_RS00020]	6666666.269962.peg.2700	1677	132.377	6.69616	124.953	130.94	121.151	143.522	136.956	136.742
locus_tag=F7O84_RS00015]	6666666.269962.peg.2701	717	93.9008	9.24855	84.6197	83.2986	107.013	105.591	96.8437	86.0383
locus_tag=F7O84_RS00010]	6666666.269962.peg.2702	711	134.166	18.5017	114.035	126.629	134.301	185.152	106.329	138.55
locus_tag=F7O84_RS00010]	6666666.269962.peg.2703	117	8.06813	4.45858	8.19406	10.1586	17.6376	9.65798	0	2.76052
locus_tag=F7O84_RS13865]	6666666.269962.peg.2704	738	51.6549	14.3693	56.4163	68.4468	73.2097	28.3262	40.6415	42.8891
locus_tag=F7O84_RS13870]	6666666.269962.peg.2705	750	2.57581	1.49286	4.20004	4.75424	3.25173	0	1.09565	2.15321
locus_tag=F7O84_RS13875]	6666666.269962.peg.2706	912	3.68678	1.19049	5.40623	5.53879	2.87982	1.85853	3.60412	2.83317
locus_tag=F7O84_RS13880]	6666666.269962.peg.2707	732	36.1483	9.02363	43.0332	48.9144	43.5683	28.5583	24.1358	28.68
locus_tag=F7O84_RS13885]	6666666.269962.peg.2708	1377	86.5263	4.30481	87.1279	86.7467	76.2933	89.4468	83.8448	95.6982
locus_tag=F7O84_RS13890]	6666666.269962.peg.2709	1788	40.9488	7.72063	45.8824	48.6093	51.5165	30.3351	32.8604	36.4889
locus_tag=F7O84_RS11570]	6666666.269962.peg.271	822	13.3179	2.73802	14.1623	6.32597	12.0959	17.1835	15.9949	14.1452
locus_tag=F7O84_RS13895]	6666666.269962.peg.2710	1794	11.7984	1.7624	10.9169	14.2442	14.6399	11.3376	9.38999	10.2619
locus_tag=F7O84_RS13900]	6666666.269962.peg.2711	783	45.158	3.33355	46.5272	51.231	47.1994	45.4591	35.1574	45.3741
locus_tag=F7O84_RS13905]	6666666.269962.peg.2712	117	3.21381	2.43342	2.34116	3.80948	9.6205	0	3.5117	0
locus_tag=F7O84_RS13910]	6666666.269962.peg.2713	1779	68.33	14.877	75.6771	86.1021	87.8419	51.7671	53.5816	55.0103
locus_tag=F7O84_RS13915]	6666666.269962.peg.2714	1350	472.053	44.6241	583.846	494.133	431.619	427.72	436.13	458.873
locus_tag=F7O84_RS13920]	6666666.269962.peg.2715	777	19.618	2.1864	17.8028	18.9298	18.8324	26.1772	18.5076	17.4585
locus_tag=F7O84_RS13925]	6666666.269962.peg.2716	657	173.998	9.42486	182.194	168.696	157.333	167.692	183.234	184.842
locus_tag=F7O84_RS13930]	6666666.269962.peg.2717	240	562.996	131.384	579.788	763.897	739.456	395.494	486.195	413.147
locus_tag=F7O84_RS13935]	6666666.269962.peg.2718	1062	314.601	13.2716	313.765	331.974	337.044	309.096	281.264	314.466
locus_tag=F7O84_RS13940]	6666666.269962.peg.2719	411	453.943	47.5232	409.541	430.889	393.914	538.873	438.86	511.584
locus_tag=F7O84_RS11575]	6666666.269962.peg.272	1077	1.34334	0.341339	1.52599	1.37948	1.3935	2.09839	0.762988	0.899669
locus_tag=F7O84_RS13945]	6666666.269962.peg.2720	741	389.514	68.1042	476.118	477.99	418.745	326.338	306.627	331.263
locus_tag=F7O84_RS13950]	6666666.269962.peg.2721	990	190.788	20.1064	190.773	185.337	168.271	251.107	159.367	189.874
locus_tag=F7O84_RS13955]	6666666.269962.peg.2722	636	187.304	76.648	184.118	243.178	311.487	237.19	47.8055	100.043
locus_tag=F7O84_RS13960]	6666666.269962.peg.2723	1323	1.27323	0.615024	0.931686	1.68447	1.41799	2.56232	0.310559	0.732384
locus_tag=F7O84_RS13965]	6666666.269962.peg.2724	441	0.0517603	0.0862672	0.310562	0	0	0	0	0
locus_tag=F7O84_RS13970]	6666666.269962.peg.2725	426	1.06048	0.682643	0	0.348756	0.88075	2.65254	0.964482	1.51634
locus_tag=F7O84_RS13975]	6666666.269962.peg.2726	915	0.531123	0.177041	0.598723	0.649486	0.615081	0.617477	0	0.70597
locus_tag=F7O84_RS13980]	6666666.269962.peg.2727	1548	0.84869	0.237253	0.530844	1.43963	0.969508	0.729964	0.796258	0.625933
locus_tag=F7O84_RS13985]	6666666.269962.peg.2728	174	7.02818	1.73363	7.87114	9.39235	8.62528	6.49416	2.36132	7.42486
locus_tag=F7O84_RS13990]	6666666.269962.peg.2729	1479	0.508071	0.307941	0.55561	1.00453	0.887896	0.382009	0	0.218378
locus_tag=F7O84_RS11580]	6666666.269962.peg.273	672	2.67317	0.708388	3.0571	1.5476	2.5125	4.20381	1.83424	2.88376
locus_tag=F7O84_RS13995]	6666666.269962.peg.2730	741	0.37582	0.439483	0.184828	0	0	0.762472	0	1.30762
locus_tag=F7O84_RS14000]	6666666.269962.peg.2731	1227	0.616027	0.500924	0.892961	0.363252	0	1.84186	0.334857	0.263228
locus_tag=F7O84_RS14005]	6666666.269962.peg.2732	1023	0.434088	0.52469	0.267757	0.14523	0.183382	0	2.00816	0
locus_tag=F7O84_RS14010]	6666666.269962.peg.2733	330	1.01394	0.875598	0.415024	2.25106	1.70545	1.7121	0	0
locus_tag=F7O84_RS14015]	6666666.269962.peg.2734	273	0.174315	0.23242	0.501677	0.544212	0	0	0	0
locus_tag=F7O84_RS14020]	6666666.269962.peg.2735	273	1.19376	0.801035	0.501677	2.72106	0.687179	2.06957	0	1.18308
locus_tag=F7O84_RS14025]	6666666.269962.peg.2736	477	137.043	21.7107	125.76	116.8	103.436	157.534	144.709	174.017
locus_tag=F7O84_RS14030]	6666666.269962.peg.2737	1524	202.274	16.3984	221.343	195.851	173.074	188.701	228.89	205.784
locus_tag=F7O84_RS14035]	6666666.269962.peg.2738	3147	73.3404	3.8646	75.725	71.0039	64.0832	74.6859	77.1604	77.3842
locus_tag=F7O84_RS14040]	6666666.269962.peg.2739	1680	36.1463	5.68928	37.0928	44.3057	44.1083	35.6483	25.9239	29.7989
locus_tag=F7O84_RS11585]	6666666.269962.peg.274	834	4.35838	0.813979	3.94123	3.20654	5.84844	4.74214	4.92649	3.48541
locus_tag=F7O84_RS14045]	6666666.269962.peg.2740	840	37.6821	3.57234	37.6634	44.9247	33.0533	31.6126	39.6195	39.2192
locus_tag=F7O84_RS14050]	6666666.269962.peg.2741	498	32.804	8.53209	46.7527	44.4516	32.3968	19.2869	24.7512	29.1851
locus_tag=F7O84_RS14055]	6666666.269962.peg.2742	837	59.0234	8.69253	50.3979	53.9609	64.5505	74.9272	46.6339	63.6702
locus_tag=F7O84_RS14060]	6666666.269962.peg.2743	729	94.0702	32.264	56.737	66.4387	66.136	144.929	90.1771	140.003
locus_tag=F7O84_RS14065]	6666666.269962.peg.2744	939	20.9202	6.52618	15.1689	22.4674	24.9734	34.8983	8.75121	19.2619
locus_tag=F7O84_RS14070]	6666666.269962.peg.2745	1251	10.6879	4.88442	11.4953	16.6265	18.595	9.03264	2.95589	5.42175
locus_tag=F7O84_RS14075]	6666666.269962.peg.2746	474	18.879	6.34959	14.736	19.7466	21.3721	34.567	11.2686	11.5837
locus_tag=F7O84_RS14080]	6666666.269962.peg.2747	480	5.49443	1.86552	3.9946	3.09521	3.90833	10.5936	5.99184	5.38302
locus_tag=F7O84_RS14085]	6666666.269962.peg.2748	1089	15.087	3.92748	11.1931	14.0521	14.6428	25.9409	8.67768	16.0156
locus_tag=F7O84_RS14090]	6666666.269962.peg.2749	1230	10.4087	3.47461	7.9057	7.85126	6.10081	16.5363	9.35312	14.7048
locus_tag=F7O84_RS14805]	6666666.269962.peg.275	708	22.047	13.1677	27.6624	39.0311	38.9508	14.3642	4.06227	8.21139
locus_tag=F7O84_RS14095]	6666666.269962.peg.2750	2325	34.6181	5.33469	30.3958	33.4202	31.7911	49.8165	26.8611	35.4238
locus_tag=F7O84_RS14100]	6666666.269962.peg.2751	1221	36.6305	1.40775	35.4453	36.0169	40.7158	35.1674	35.6692	36.7686
locus_tag=F7O84_RS14105]	6666666.269962.peg.2752	1491	88.7744	6.15537	90.9378	79.8152	79.2675	90.9444	98.1016	93.5801
locus_tag=F7O84_RS14110]	6666666.269962.peg.2753	1008	52.4184	12.0223	41.7124	39.6481	39.8277	62.2164	67.663	63.4428
locus_tag=F7O84_RS14115]	6666666.269962.peg.2754	945	37.5679	13.1686	20.7248	32.7011	32.557	63.3747	24.7826	51.2669
locus_tag=F7O84_RS14120]	6666666.269962.peg.2755	1920	108.418	17.0351	99.7938	86.1241	88.2305	125.946	136.528	113.885
locus_tag=F7O84_RS14125]	6666666.269962.peg.2756	1155	180.244	95.5899	83.0048	77.5651	93.3939	257.304	278.537	291.662
locus_tag=F7O84_RS14130]	6666666.269962.peg.2757	1539	88.7975	49.4686	39.6902	36.9735	41.3232	144.277	145.233	125.289
locus_tag=F7O84_RS14135]	6666666.269962.peg.2758	1158	918.093	588.603	311.644	311.509	365.317	1383.69	1701.67	1434.73
locus_tag=F7O84_RS14140]	6666666.269962.peg.2759	1032	29.0759	17.2359	9.42249	11.3731	14.7244	47.6301	49.368	41.9375
locus_tag=F7O84_RS14810]	6666666.269962.peg.276	537	84.5677	25.1649	109.668	103.197	116.333	59.9712	63.5049	54.7324
locus_tag=F7O84_RS14145]	6666666.269962.peg.2760	1605	8.35454	4.79215	4.77859	2.86957	3.039	13.3768	11.7757	14.2876
locus_tag=F7O84_RS14150]	6666666.269962.peg.2761	1524	4.34356	2.06586	2.06695	3.11958	2.21575	8.52678	3.77439	6.3579
locus_tag=F7O84_RS14155]	6666666.269962.peg.2762	1041	7.71077	4.42356	4.3416	2.99709	2.52296	13.0257	10.6566	12.7207
locus_tag=F7O84_RS14160]	6666666.269962.peg.2763	2523	218.476	34.919	195.367	185.55	169.754	266.932	240.04	253.213
locus_tag=F7O84_RS14165]	6666666.269962.peg.2764	2289	537.717	191.5	692.987	721.236	773.429	317.175	378.739	342.736
locus_tag=F7O84_RS14170]	6666666.269962.peg.2765	1392	29.9504	10.4554	36.2073	40.4511	44.4741	30.0355	9.74044	18.7942
locus_tag=F7O84_RS14175]	6666666.269962.peg.2766	258	21.1578	4.32215	16.987	26.4892	17.4511	19.709	17.5177	28.7929
locus_tag=F7O84_RS14180]	6666666.269962.peg.2767	213	3.01678	1.70272	3.21497	2.79005	7.92675	2.65254	0	1.51634
locus_tag=F7O84_RS14185]	6666666.269962.peg.2768	402	23.14	3.32052	22.1449	23.2833	30.8	25.2981	20.4413	16.8722
locus_tag=F7O84_RS14190]	6666666.269962.peg.2769	810	20.3239	8.33802	13.8649	9.3544	12.7383	29.9934	26.884	29.1082
locus_tag=F7O84_RS14815]	6666666.269962.peg.277	846	116.548	26.6376	113.16	154.014	158.994	86.8191	87.419	98.8796
locus_tag=F7O84_RS14195]	6666666.269962.peg.2770	795	0.957986	0.383	1.03364	0.747522	0.707924	0.710682	0.516817	2.03133
locus_tag=F7O84_RS14200]	6666666.269962.peg.2771	639	1.63444	0.646671	1.07166	1.86003	0.88075	1.76836	3.21494	1.0109
locus_tag=F7O84_RS14205]	6666666.269962.peg.2772	1209	2.30315	1.04071	1.35938	3.19505	4.49991	2.33661	1.35937	1.06859
locus_tag=F7O84_RS14210]	6666666.269962.peg.2773	804	5.46293	1.66816	7.8359	4.8045	7.93333	3.51363	3.06619	5.62405
locus_tag=F7O84_RS14215]	6666666.269962.peg.2774	1347	32.9961	3.17826	33.9599	34.9641	36.9072	26.0056	35.688	30.4518
locus_tag=F7O84_RS14220]	6666666.269962.peg.2775	1404	7.97093	0.636527	8.6818	7.30151	8.55156	8.04832	6.73076	8.51162
locus_tag=F7O84_RS14225]	6666666.269962.peg.2776	234	1.06416	1.06416	3.51174	1.26983	1.60342	0	0	0
locus_tag=F7O84_RS14230]	6666666.269962.peg.2777	1215	15.0554	1.82916	13.7521	14.429	15.9035	17.2055	11.4976	17.5447
locus_tag=F7O84_RS14235]	6666666.269962.peg.2778	2214	6.01474	0.771712	6.18599	5.03286	5.59241	5.10381	7.60869	6.56466
locus_tag=F7O84_RS14240]	6666666.269962.peg.2779	1470	1.93841	0.676052	2.23605	1.51602	3.19047	1.15304	1.11801	2.41687
locus_tag=F7O84_RS14820]	6666666.269962.peg.278	1590	10.0663	8.8386	11.7146	20.9306	24.0694	0.710682	1.55045	1.42193
locus_tag=F7O84_RS14245]	6666666.269962.peg.2780	2229	2.71956	0.570711	3.13363	3.1327	3.28237	3.04168	1.84329	1.8837
locus_tag=F7O84_RS14250]	6666666.269962.peg.2781	1800	9.71147	1.0991	8.14138	8.00627	10.318	11.6137	10.5	9.68944
locus_tag=F7O84_RS14255]	6666666.269962.peg.2782	1008	4.26412	1.09335	4.89135	5.74824	5.21111	2.80254	2.44565	4.48585
locus_tag=F7O84_RS14260]	6666666.269962.peg.2783	570	7.14074	3.68264	2.16249	9.38336	4.60772	8.92092	3.60412	14.1658
locus_tag=F7O84_RS16350]	6666666.269962.peg.2784	129	7.79219	7.62209	4.24676	1.1517	0	30.6585	3.18503	7.51119
locus_tag=F7O84_RS14265]	6666666.269962.peg.2785	612	83.5167	18.9004	67.1362	67.2449	59.4679	121.861	84.5907	100.8
locus_tag=F7O84_RS14270]	6666666.269962.peg.2786	474	339.081	38.9537	285.473	303.095	315.437	414.804	335.457	380.219
locus_tag=F7O84_RS14275]	6666666.269962.peg.2787	327	24.2884	6.49659	29.737	27.7149	33.2746	25.9171	11.3083	17.7788
locus_tag=F7O84_RS14280]	6666666.269962.peg.2788	273	11.9315	4.45492	10.0335	15.2379	21.9897	10.3478	4.51505	9.46465
locus_tag=F7O84_RS14285]	6666666.269962.peg.2789	309	8.22974	3.10717	7.5349	12.9818	7.89255	12.7992	3.98902	4.18099
locus_tag=F7O84_RS14825]	6666666.269962.peg.279	2499	414.767	77.5241	493.081	496.363	487.429	333.705	323.895	354.129
locus_tag=F7O84_RS14290]	6666666.269962.peg.2790	255	0.495853	0.495853	1.07418	1.16525	0.735686	0	0	0
locus_tag=F7O84_RS14295]	6666666.269962.peg.2791	165	0.438483	0.584643	0.830048	1.80085	0	0	0	0
locus_tag=F7O84_RS14300]	6666666.269962.peg.2792	201	0.736296	0.981728	0	0	0	2.8109	0	1.60687
locus_tag=F7O84_RS10910]	6666666.269962.peg.2793	123	0	0	0	0	0	0	0	0
locus_tag=F7O84_RS11805]	6666666.269962.peg.2794	171	1.86443	2.21893	0.800923	0	0	6.60809	0	3.77756
locus_tag=F7O84_RS14305]	6666666.269962.peg.2795	642	0.469058	0.300544	0.21333	0.925669	0.292212	0.88005	0	0.503086
locus_tag=F7O84_RS07580]	6666666.269962.peg.2796	249	25.5383	21.5201	28.0516	48.33	64.7935	2.26904	3.30016	6.48557
locus_tag=F7O84_RS14310]	6666666.269962.peg.2797	867	141.088	40.4563	102.521	98.1898	111.002	222.869	131.27	180.676
[truncated: 1,770 more rows]

## Sheet: Read-counts
	Transcriptome analysis in read counts of "Candidatus Galacturonibacter soehngenii" as described in the manuscript (DOI: 10.3389/fmicb.2020.00063). 1A-C are technical triplicate samples of one enrichment culture, samples 3A-C are technical triplicate samples of the duplicate enrichment culture.
NCBI locus tag	RAST locus tag	Size	1A	1B	1C	3A	3B	3C
locus_tag=F7O84_RS12565]	6666666.269962.peg.1	252	5	4	5	5	2	6
locus_tag=F7O84_RS12615]	6666666.269962.peg.10	1014	3175	2725	2085	383	661	743
locus_tag=F7O84_RS07955]	6666666.269962.peg.100	639	767	625	541	176	246	314
locus_tag=F7O84_RS16570]	6666666.269962.peg.1000	1476	1158	938	835	471	666	681
locus_tag=F7O84_RS16565]	6666666.269962.peg.1001	837	733	680	456	175	227	330
locus_tag=F7O84_RS16560]	6666666.269962.peg.1002	906	109	132	89	32	32	72
locus_tag=F7O84_RS16555]	6666666.269962.peg.1003	1320	277	259	200	93	200	213
locus_tag=F7O84_RS16550]	6666666.269962.peg.1004	759	134	128	104	27	43	51
locus_tag=F7O84_RS16545]	6666666.269962.peg.1005	2322	156	141	127	38	40	69
locus_tag=F7O84_RS16540]	6666666.269962.peg.1006	1314	167	147	127	30	51	54
locus_tag=F7O84_RS16535]	6666666.269962.peg.1007	636	23	18	14	17	15	25
locus_tag=F7O84_RS16530]	6666666.269962.peg.1008	837	1184	1131	911	156	191	234
locus_tag=F7O84_RS16525]	6666666.269962.peg.1009	921	1615	1462	1299	198	313	326
locus_tag=F7O84_RS07950]	6666666.269962.peg.101	804	252	254	221	112	184	244
locus_tag=F7O84_RS16520]	6666666.269962.peg.1010	603	73	132	111	65	24	62
locus_tag=F7O84_RS16515]	6666666.269962.peg.1011	873	470	397	339	79	144	124
locus_tag=F7O84_RS16510]	6666666.269962.peg.1012	1029	232	143	102	48	63	78
locus_tag=F7O84_RS16505]	6666666.269962.peg.1013	225	95	85	61	9	17	34
locus_tag=F7O84_RS16500]	6666666.269962.peg.1014	165	4	7	2	1	2	1
locus_tag=F7O84_RS16495]	6666666.269962.peg.1015	615	33	25	22	3	7	11
locus_tag=F7O84_RS16490]	6666666.269962.peg.1016	741	65	85	72	15	22	25
locus_tag=F7O84_RS16485]	6666666.269962.peg.1017	855	35	28	31	4	11	9
locus_tag=F7O84_RS16480]	6666666.269962.peg.1018	1215	72	46	45	11	16	25
locus_tag=F7O84_RS16475]	6666666.269962.peg.1019	1062	598	523	382	128	150	208
locus_tag=F7O84_RS07945]	6666666.269962.peg.102	1425	516	502	518	215	360	340
locus_tag=F7O84_RS16470]	6666666.269962.peg.1020	429	95	98	61	14	44	38
locus_tag=F7O84_RS11400]	6666666.269962.peg.1021	129	249	233	166	82	75	106
locus_tag=F7O84_RS16465]	6666666.269962.peg.1022	495	202	234	179	45	55	70
locus_tag=F7O84_RS16455]	6666666.269962.peg.1023	495	131	150	123	43	34	56
locus_tag=F7O84_RS16490]	6666666.269962.peg.1024	144	50	44	29	9	10	15
locus_tag=F7O84_RS16450]	6666666.269962.peg.1025	1041	596	538	493	117	98	203
locus_tag=F7O84_RS16445]	6666666.269962.peg.1026	549	46	22	20	11	6	14
locus_tag=F7O84_RS16440]	6666666.269962.peg.1027	618	133	141	119	14	19	28
locus_tag=F7O84_RS16435]	6666666.269962.peg.1028	1578	4	3	4	2	2	1
locus_tag=F7O84_RS16430]	6666666.269962.peg.1029	414	0	1	0	0	0	0
locus_tag=F7O84_RS07940]	6666666.269962.peg.103	1197	275	195	159	151	218	260
locus_tag=F7O84_RS17130]	6666666.269962.peg.1030	294	326	333	227	33	80	106
locus_tag=F7O84_RS10620]	6666666.269962.peg.1031	663	194	208	131	62	57	108
locus_tag=F7O84_RS16420]	6666666.269962.peg.1032	228	10	14	11	2	3	3
locus_tag=F7O84_RS16415]	6666666.269962.peg.1033	1038	3	4	3	1	1	2
locus_tag=F7O84_RS16410]	6666666.269962.peg.1034	381	0	4	0	0	1	0
locus_tag=F7O84_RS16405]	6666666.269962.peg.1035	1017	1	0	1	0	0	0
locus_tag=F7O84_RS02590]	6666666.269962.peg.1036	132	0	0	0	0	0	0
locus_tag=F7O84_RS16400]	6666666.269962.peg.1037	177	34	49	36	4	4	21
locus_tag=F7O84_RS16395]	6666666.269962.peg.1038	474	146	124	76	9	26	38
locus_tag=F7O84_RS16390]	6666666.269962.peg.1039	765	82	91	63	19	11	12
locus_tag=F7O84_RS07935]	6666666.269962.peg.104	306	96	88	76	57	79	72
locus_tag=F7O84_RS16385]	6666666.269962.peg.1040	864	493	412	311	76	127	156
locus_tag=F7O84_RS16380]	6666666.269962.peg.1041	2247	18	17	14	6	3	3
locus_tag=F7O84_RS16375]	6666666.269962.peg.1042	945	20	22	21	5	3	4
locus_tag=F7O84_RS16365]	6666666.269962.peg.1043	798	51	43	38	11	12	14
locus_tag=F7O84_RS16360]	6666666.269962.peg.1044	903	57	46	34	18	20	38
locus_tag=F7O84_RS16355]	6666666.269962.peg.1045	780	19	12	17	5	3	6
locus_tag=F7O84_RS16350]	6666666.269962.peg.1046	5793	2869	2792	1995	847	794	1341
locus_tag=F7O84_RS16345]	6666666.269962.peg.1047	1356	2524	2489	1979	288	464	517
locus_tag=F7O84_RS16340]	6666666.269962.peg.1048	516	384	344	258	37	78	84
locus_tag=F7O84_RS16335]	6666666.269962.peg.1049	1191	562	545	586	164	297	272
locus_tag=F7O84_RS07930]	6666666.269962.peg.105	279	847	907	806	201	351	301
locus_tag=F7O84_RS16330]	6666666.269962.peg.1050	402	0	2	3	0	2	6
locus_tag=F7O84_RS16675]	6666666.269962.peg.1051	135	0	0	0	0	0	1
locus_tag=F7O84_RS16325]	6666666.269962.peg.1052	1065	75	83	58	16	17	24
locus_tag=F7O84_RS16320]	6666666.269962.peg.1053	903	690	774	685	191	56	176
locus_tag=F7O84_RS16310]	6666666.269962.peg.1054	954	502	507	390	135	143	260
locus_tag=F7O84_RS16305]	6666666.269962.peg.1055	942	2221	1904	1425	656	868	1394
locus_tag=F7O84_RS16300]	6666666.269962.peg.1056	1311	2413	2517	2096	429	744	878
locus_tag=F7O84_RS16295]	6666666.269962.peg.1057	2373	2651	2466	1771	599	950	1159
locus_tag=F7O84_RS16290]	6666666.269962.peg.1058	699	1597	1170	812	293	588	686
locus_tag=F7O84_RS16285]	6666666.269962.peg.1059	1428	771	818	559	331	329	493
locus_tag=F7O84_RS07925]	6666666.269962.peg.106	297	627	684	639	176	292	326
locus_tag=F7O84_RS16280]	6666666.269962.peg.1060	477	46	57	37	4	2	14
locus_tag=F7O84_RS16275]	6666666.269962.peg.1061	903	132	149	122	23	25	45
locus_tag=F7O84_RS16270]	6666666.269962.peg.1062	1743	29	31	29	6	5	11
locus_tag=F7O84_RS16265]	6666666.269962.peg.1063	120	43	54	43	10	2	16
locus_tag=F7O84_RS03670]	6666666.269962.peg.1064	120	40	81	70	70	23	64
locus_tag=F7O84_RS16260]	6666666.269962.peg.1065	2307	22	17	18	8	2	6
locus_tag=F7O84_RS16255]	6666666.269962.peg.1066	300	2	1	2	0	0	0
locus_tag=F7O84_RS02185]	6666666.269962.peg.1067	144	0	2	3	2	0	1
locus_tag=F7O84_RS16250]	6666666.269962.peg.1068	696	0	5	5	0	0	0
locus_tag=F7O84_RS16245]	6666666.269962.peg.1069	414	5	1	3	0	0	0
locus_tag=F7O84_RS07920]	6666666.269962.peg.107	450	3503	3127	2260	770	1434	1408
locus_tag=F7O84_RS16240]	6666666.269962.peg.1070	1161	12	21	12	5	2	5
locus_tag=F7O84_RS16235]	6666666.269962.peg.1071	285	70	70	37	19	9	26
locus_tag=F7O84_RS16230]	6666666.269962.peg.1072	549	767	616	433	161	270	319
locus_tag=F7O84_RS16225]	6666666.269962.peg.1073	1455	1751	1544	1336	304	425	492
locus_tag=F7O84_RS16220]	6666666.269962.peg.1074	633	1147	1216	1017	130	188	220
locus_tag=F7O84_RS16215]	6666666.269962.peg.1075	1974	263	309	212	58	77	112
locus_tag=F7O84_RS16210]	6666666.269962.peg.1076	768	135	154	115	17	27	43
locus_tag=F7O84_RS16205]	6666666.269962.peg.1077	747	916	761	558	209	218	340
locus_tag=F7O84_RS16200]	6666666.269962.peg.1078	675	466	450	333	130	88	133
locus_tag=F7O84_RS16195]	6666666.269962.peg.1079	381	323	257	200	61	90	98
locus_tag=F7O84_RS07915]	6666666.269962.peg.108	642	726	639	554	256	359	418
locus_tag=F7O84_RS16190]	6666666.269962.peg.1080	435	277	162	135	69	80	73
locus_tag=F7O84_RS16185]	6666666.269962.peg.1081	297	16	19	16	3	4	3
locus_tag=F7O84_RS10595]	6666666.269962.peg.1082	525	3	4	0	0	0	1
locus_tag=F7O84_RS10590]	6666666.269962.peg.1083	657	101	117	78	35	25	41
locus_tag=F7O84_RS10585]	6666666.269962.peg.1084	435	183	122	94	84	97	102
locus_tag=F7O84_RS10580]	6666666.269962.peg.1085	3876	1532	1442	1412	363	662	642
locus_tag=F7O84_RS10575]	6666666.269962.peg.1086	345	119	71	85	28	44	42
locus_tag=F7O84_RS13855]	6666666.269962.peg.1087	528	177	165	188	52	54	63
locus_tag=F7O84_RS13850]	6666666.269962.peg.1088	654	291	366	324	145	71	156
locus_tag=F7O84_RS13845]	6666666.269962.peg.1089	471	42	59	48	51	35	40
locus_tag=F7O84_RS07910]	6666666.269962.peg.109	276	29	30	21	12	8	17
locus_tag=F7O84_RS13840]	6666666.269962.peg.1090	1650	2005	1801	1409	459	635	817
locus_tag=F7O84_RS13835]	6666666.269962.peg.1091	672	4414	4065	2910	710	1265	1408
locus_tag=F7O84_RS13830]	6666666.269962.peg.1092	1875	849	1062	812	242	133	337
locus_tag=F7O84_RS17150]	6666666.269962.peg.1093	141	46	36	38	11	8	20
locus_tag=F7O84_RS17155]	6666666.269962.peg.1094	1398	351	363	465	66	172	128
locus_tag=F7O84_RS17160]	6666666.269962.peg.1095	216	104	75	54	10	21	30
locus_tag=F7O84_RS17165]	6666666.269962.peg.1096	666	276	264	204	77	99	141
locus_tag=F7O84_RS17170]	6666666.269962.peg.1097	1014	1103	1133	780	147	189	254
locus_tag=F7O84_RS17175]	6666666.269962.peg.1098	768	517	452	591	126	194	203
locus_tag=F7O84_RS17180]	6666666.269962.peg.1099	2214	1373	1435	1086	230	342	516
locus_tag=F7O84_RS12620]	6666666.269962.peg.11	144	11	13	11	4	0	2
locus_tag=F7O84_RS07905]	6666666.269962.peg.110	1335	1040	917	660	295	434	509
locus_tag=F7O84_RS17185]	6666666.269962.peg.1100	420	2	7	2	0	0	1
locus_tag=F7O84_RS17195]	6666666.269962.peg.1101	267	17	13	10	1	5	3
locus_tag=F7O84_RS17200]	6666666.269962.peg.1102	1680	1258	1285	928	289	600	573
locus_tag=F7O84_RS17205]	6666666.269962.peg.1103	474	290	342	360	126	206	191
locus_tag=F7O84_RS17210]	6666666.269962.peg.1104	1083	8	7	1	2	1	0
locus_tag=F7O84_RS17215]	6666666.269962.peg.1105	1002	40	42	30	25	13	21
locus_tag=F7O84_RS17225]	6666666.269962.peg.1106	660	326	262	234	40	57	71
locus_tag=F7O84_RS17230]	6666666.269962.peg.1107	678	321	344	349	33	53	65
locus_tag=F7O84_RS17235]	6666666.269962.peg.1108	756	611	505	402	70	124	139
locus_tag=F7O84_RS17240]	6666666.269962.peg.1109	915	2978	2833	1884	555	815	1004
locus_tag=F7O84_RS07900]	6666666.269962.peg.111	549	423	410	271	128	192	243
locus_tag=F7O84_RS17245]	6666666.269962.peg.1110	801	146	150	100	33	34	58
locus_tag=F7O84_RS17250]	6666666.269962.peg.1111	2316	149	189	133	27	54	64
locus_tag=F7O84_RS17255]	6666666.269962.peg.1112	765	176	153	110	48	69	86
locus_tag=F7O84_RS17260]	6666666.269962.peg.1113	1413	316	254	204	72	62	125
locus_tag=F7O84_RS17265]	6666666.269962.peg.1114	660	88	101	72	42	24	50
locus_tag=F7O84_RS17270]	6666666.269962.peg.1115	3312	1860	1632	1227	489	571	865
locus_tag=F7O84_RS17275]	6666666.269962.peg.1116	1134	4566	3771	2493	1051	1671	2170
locus_tag=F7O84_RS17280]	6666666.269962.peg.1117	1290	2145	2005	1314	400	463	739
locus_tag=F7O84_RS17285]	6666666.269962.peg.1118	753	223	191	152	55	63	84
locus_tag=F7O84_RS17290]	6666666.269962.peg.1119	888	109	103	88	26	33	57
locus_tag=F7O84_RS07895]	6666666.269962.peg.112	897	462	447	359	113	141	159
locus_tag=F7O84_RS17295]	6666666.269962.peg.1120	828	53	49	32	5	11	24
locus_tag=F7O84_RS17300]	6666666.269962.peg.1121	1083	4	8	8	2	5	4
locus_tag=F7O84_RS17305]	6666666.269962.peg.1122	675	246	240	209	54	82	82
locus_tag=F7O84_RS17310]	6666666.269962.peg.1123	708	739	638	578	202	289	301
locus_tag=F7O84_RS17315]	6666666.269962.peg.1124	1725	306	236	200	90	132	134
locus_tag=F7O84_RS17320]	6666666.269962.peg.1125	498	11	13	6	11	8	13
locus_tag=F7O84_RS17325]	6666666.269962.peg.1126	1278	394	342	275	112	187	199
locus_tag=F7O84_RS17330]	6666666.269962.peg.1127	1230	444	418	336	107	188	194
locus_tag=F7O84_RS17335]	6666666.269962.peg.1128	1197	650	670	545	167	191	302
locus_tag=F7O84_RS17340]	6666666.269962.peg.1129	1569	1122	955	746	244	285	416
locus_tag=F7O84_RS07890]	6666666.269962.peg.113	765	162	201	158	107	64	160
locus_tag=F7O84_RS17345]	6666666.269962.peg.1130	711	513	464	322	94	96	160
locus_tag=F7O84_RS17350]	6666666.269962.peg.1131	723	152	176	145	78	40	112
locus_tag=F7O84_RS17355]	6666666.269962.peg.1132	216	9	8	9	3	0	2
locus_tag=F7O84_RS17360]	6666666.269962.peg.1133	1407	36938	34993	23038	20051	26806	38638
locus_tag=F7O84_RS17365]	6666666.269962.peg.1134	1002	903	1052	727	666	528	1094
locus_tag=F7O84_RS17370]	6666666.269962.peg.1135	1494	18682	19653	14532	13034	12490	21022
locus_tag=F7O84_RS17375]	6666666.269962.peg.1136	1482	68469	63640	46898	24103	43416	49048
locus_tag=F7O84_RS17380]	6666666.269962.peg.1137	945	6303	7166	5995	1199	1652	2170
locus_tag=F7O84_RS17385]	6666666.269962.peg.1138	3756	520	489	354	78	101	167
locus_tag=F7O84_RS17390]	6666666.269962.peg.1139	1032	13440	11138	7834	5955	7132	11519
locus_tag=F7O84_RS07885]	6666666.269962.peg.114	1425	1953	1969	1386	427	587	769
locus_tag=F7O84_RS17395]	6666666.269962.peg.1140	963	12109	9755	6638	3217	4494	6521
locus_tag=F7O84_RS17400]	6666666.269962.peg.1141	786	847	756	615	160	241	273
locus_tag=F7O84_RS17405]	6666666.269962.peg.1142	411	14	16	14	11	5	11
locus_tag=F7O84_RS17410]	6666666.269962.peg.1143	477	394	384	296	75	118	150
locus_tag=F7O84_RS17415]	6666666.269962.peg.1144	1794	76	108	106	33	24	38
locus_tag=F7O84_RS17420]	6666666.269962.peg.1145	420	3778	3422	2369	1119	1644	2047
locus_tag=F7O84_RS17425]	6666666.269962.peg.1146	2319	639	568	441	192	170	306
locus_tag=F7O84_RS17430]	6666666.269962.peg.1147	972	69	72	40	20	31	33
locus_tag=F7O84_RS17435]	6666666.269962.peg.1148	924	80	87	74	20	26	31
locus_tag=F7O84_RS17440]	6666666.269962.peg.1149	1662	2091	2001	1712	743	1189	1535
locus_tag=F7O84_RS07880]	6666666.269962.peg.115	1875	20636	18967	12744	5385	7858	9939
locus_tag=F7O84_RS17445]	6666666.269962.peg.1150	1032	721	641	487	237	317	420
locus_tag=F7O84_RS17450]	6666666.269962.peg.1151	267	108	72	47	24	34	29
locus_tag=F7O84_RS17455]	6666666.269962.peg.1152	1557	46	40	28	29	26	54
locus_tag=F7O84_RS17460]	6666666.269962.peg.1153	873	834	869	821	135	160	204
locus_tag=F7O84_RS17465]	6666666.269962.peg.1154	675	1535	1508	1255	222	300	335
locus_tag=F7O84_RS17470]	6666666.269962.peg.1155	642	318	297	200	62	81	106
locus_tag=F7O84_RS17475]	6666666.269962.peg.1156	849	991	1140	1032	208	328	379
locus_tag=F7O84_RS17480]	6666666.269962.peg.1157	450	214	220	201	78	57	114
locus_tag=F7O84_RS17485]	6666666.269962.peg.1158	2724	18	18	23	2	7	8
locus_tag=F7O84_RS17490]	6666666.269962.peg.1159	2772	20	21	18	13	4	9
locus_tag=F7O84_RS07875]	6666666.269962.peg.116	549	200	220	239	69	111	120
locus_tag=F7O84_RS17495]	6666666.269962.peg.1160	741	397	417	313	91	109	151
locus_tag=F7O84_RS17500]	6666666.269962.peg.1161	1377	59	61	44	20	22	20
locus_tag=F7O84_RS17505]	6666666.269962.peg.1162	921	39	52	22	10	10	17
locus_tag=F7O84_RS17510]	6666666.269962.peg.1163	861	52	77	45	17	16	33
locus_tag=F7O84_RS17515]	6666666.269962.peg.1164	459	4446	3512	2795	941	1184	1778
locus_tag=F7O84_RS17520]	6666666.269962.peg.1165	1731	246	215	169	92	154	154
locus_tag=F7O84_RS17525]	6666666.269962.peg.1166	597	30	30	38	17	15	18
locus_tag=F7O84_RS13250]	6666666.269962.peg.1167	120	786	659	606	141	132	253
locus_tag=F7O84_RS17530]	6666666.269962.peg.1168	3129	11191	10405	7957	1433	2193	2648
locus_tag=F7O84_RS10580]	6666666.269962.peg.1169	132	9	9	2	2	3	1
locus_tag=F7O84_RS07870]	6666666.269962.peg.117	477	1906	1584	1101	197	310	379
locus_tag=F7O84_RS17535]	6666666.269962.peg.1170	2463	732	680	536	172	208	289
locus_tag=F7O84_RS17540]	6666666.269962.peg.1171	1437	937	1102	815	308	344	486
locus_tag=F7O84_RS17545]	6666666.269962.peg.1172	912	55	45	42	16	12	30
locus_tag=F7O84_RS17550]	6666666.269962.peg.1173	840	60	64	48	26	35	45
locus_tag=F7O84_RS17555]	6666666.269962.peg.1174	186	67	62	59	23	5	24
locus_tag=F7O84_RS17560]	6666666.269962.peg.1175	669	914	1022	768	226	192	419
locus_tag=F7O84_RS17565]	6666666.269962.peg.1176	444	270	192	206	314	309	301
locus_tag=F7O84_RS17570]	6666666.269962.peg.1177	921	9278	8699	7695	2894	4569	4725
locus_tag=F7O84_RS17575]	6666666.269962.peg.1178	1161	89	95	78	76	56	82
locus_tag=F7O84_RS17580]	6666666.269962.peg.1179	990	1156	958	886	248	358	342
locus_tag=F7O84_RS07865]	6666666.269962.peg.118	1137	12	10	2	1	4	3
locus_tag=F7O84_RS17585]	6666666.269962.peg.1180	258	43	44	47	18	15	18
locus_tag=F7O84_RS17590]	6666666.269962.peg.1181	981	2531	2318	1972	601	768	1112
locus_tag=F7O84_RS17595]	6666666.269962.peg.1182	342	205	201	198	42	39	41
locus_tag=F7O84_RS17600]	6666666.269962.peg.1183	783	1010	869	874	238	266	297
locus_tag=F7O84_RS17605]	6666666.269962.peg.1184	960	2171	1949	1715	292	509	500
locus_tag=F7O84_RS08860]	6666666.269962.peg.1185	117	175	164	138	29	42	35
locus_tag=F7O84_RS17610]	6666666.269962.peg.1186	483	516	487	412	122	151	176
locus_tag=F7O84_RS17615]	6666666.269962.peg.1187	1491	7778	6954	6116	1356	1724	2205
locus_tag=F7O84_RS17620]	6666666.269962.peg.1188	1770	437	476	447	151	85	195
locus_tag=F7O84_RS17625]	6666666.269962.peg.1189	591	81	91	108	3	7	1
locus_tag=F7O84_RS07860]	6666666.269962.peg.119	864	10	4	8	1	3	5
locus_tag=F7O84_RS17630]	6666666.269962.peg.1190	267	4	8	19	2	3	3
locus_tag=F7O84_RS17635]	6666666.269962.peg.1191	582	13	8	14	8	3	9
locus_tag=F7O84_RS17640]	6666666.269962.peg.1192	705	13	19	1	3	2	6
locus_tag=F7O84_RS17645]	6666666.269962.peg.1193	1092	8	4	10	7	1	8
locus_tag=F7O84_RS17650]	6666666.269962.peg.1194	198	1	5	4	1	0	2
locus_tag=F7O84_RS17655]	6666666.269962.peg.1195	1251	826	652	592	634	699	938
locus_tag=F7O84_RS17660]	6666666.269962.peg.1196	1587	841	831	632	228	326	460
locus_tag=F7O84_RS17665]	6666666.269962.peg.1197	333	325	290	223	109	156	154
locus_tag=F7O84_RS17670]	6666666.269962.peg.1198	279	11	3	12	9	0	1
locus_tag=F7O84_RS17675]	6666666.269962.peg.1199	516	135	126	83	63	51	81
locus_tag=F7O84_RS12625]	6666666.269962.peg.12	933	233	190	170	36	21	44
locus_tag=F7O84_RS07855]	6666666.269962.peg.120	909	4	13	3	1	2	2
locus_tag=F7O84_RS17680]	6666666.269962.peg.1200	1812	970	807	715	230	354	398
locus_tag=F7O84_RS17685]	6666666.269962.peg.1201	2046	1299	1142	1027	348	487	600
locus_tag=F7O84_RS17690]	6666666.269962.peg.1202	1743	639	555	462	365	413	517
locus_tag=F7O84_RS17695]	6666666.269962.peg.1203	465	46	32	34	15	27	15
locus_tag=F7O84_RS17700]	6666666.269962.peg.1204	222	8	13	7	6	7	13
locus_tag=F7O84_RS17705]	6666666.269962.peg.1205	399	21	9	9	7	6	7
locus_tag=F7O84_RS17710]	6666666.269962.peg.1206	1545	484	359	375	240	280	315
locus_tag=F7O84_RS17715]	6666666.269962.peg.1207	372	253	222	175	165	143	273
locus_tag=F7O84_RS17720]	6666666.269962.peg.1208	483	434	483	381	199	209	329
locus_tag=F7O84_RS17725]	6666666.269962.peg.1209	810	64430	53521	35076	23487	25942	42769
locus_tag=F7O84_RS07850]	6666666.269962.peg.121	1428	47	32	39	9	18	24
locus_tag=F7O84_RS17730]	6666666.269962.peg.1210	309	53	51	55	7	2	6
locus_tag=F7O84_RS17735]	6666666.269962.peg.1211	1869	920	785	604	323	244	445
locus_tag=F7O84_RS17740]	6666666.269962.peg.1212	1245	452	508	401	91	77	137
locus_tag=F7O84_RS17750]	6666666.269962.peg.1213	363	158	178	138	101	41	101
locus_tag=F7O84_RS17755]	6666666.269962.peg.1214	1287	1411	1881	1563	302	133	378
locus_tag=F7O84_RS17765]	6666666.269962.peg.1215	207	2846	2225	1520	456	585	771
locus_tag=F7O84_RS17770]	6666666.269962.peg.1216	516	33814	29845	21916	3260	5329	6023
locus_tag=F7O84_RS17775]	6666666.269962.peg.1217	426	7515	7855	6337	976	1237	2007
locus_tag=F7O84_RS17780]	6666666.269962.peg.1218	693	65497	67263	56783	6615	12158	13869
locus_tag=F7O84_RS17785]	6666666.269962.peg.1219	2061	199	220	184	26	33	64
locus_tag=F7O84_RS07845]	6666666.269962.peg.122	732	179	121	103	34	56	61
locus_tag=F7O84_RS17790]	6666666.269962.peg.1220	1587	110	137	126	18	12	23
locus_tag=F7O84_RS17795]	6666666.269962.peg.1221	1191	935	932	688	140	137	235
locus_tag=F7O84_RS17800]	6666666.269962.peg.1222	1194	2922	3366	2781	324	449	569
locus_tag=F7O84_RS17805]	6666666.269962.peg.1223	489	14857	12769	8661	2526	3882	5220
locus_tag=F7O84_RS17810]	6666666.269962.peg.1224	372	31785	39100	36514	2738	5116	5154
locus_tag=F7O84_RS17815]	6666666.269962.peg.1225	3861	48417	42211	33383	6490	10085	12566
locus_tag=F7O84_RS17820]	6666666.269962.peg.1226	3696	78179	76287	63422	9998	15760	19239
locus_tag=F7O84_RS17825]	6666666.269962.peg.1227	918	261	218	176	79	69	141
locus_tag=F7O84_RS17830]	6666666.269962.peg.1228	1047	714	664	575	100	166	211
locus_tag=F7O84_RS17835]	6666666.269962.peg.1229	999	1055	950	789	191	334	368
locus_tag=F7O84_RS07840]	6666666.269962.peg.123	996	100	104	79	60	58	103
locus_tag=F7O84_RS17840]	6666666.269962.peg.1230	990	1407	1185	836	241	369	447
locus_tag=F7O84_RS17845]	6666666.269962.peg.1231	1689	59642	51221	41076	9995	16815	19782
locus_tag=F7O84_RS17850]	6666666.269962.peg.1232	1029	6599	6450	5154	3960	4129	6667
locus_tag=F7O84_RS17855]	6666666.269962.peg.1233	1185	703	792	657	225	171	399
locus_tag=F7O84_RS17860]	6666666.269962.peg.1234	420	77662	65334	41948	10332	19114	20035
locus_tag=F7O84_RS17865]	6666666.269962.peg.1235	471	65521	62174	50588	5825	11520	12237
locus_tag=F7O84_RS17870]	6666666.269962.peg.1236	2118	120153	115608	90996	10344	18176	20788
locus_tag=F7O84_RS17875]	6666666.269962.peg.1237	1194	200732	182227	128888	34827	62009	73971
locus_tag=F7O84_RS17880]	6666666.269962.peg.1238	351	177	221	166	68	46	112
locus_tag=F7O84_RS17885]	6666666.269962.peg.1239	1908	2911	2663	1885	609	665	1034
locus_tag=F7O84_RS07835]	6666666.269962.peg.124	840	340	342	301	39	43	62
locus_tag=F7O84_RS17890]	6666666.269962.peg.1240	693	1585	1488	1306	896	828	1219
locus_tag=F7O84_RS17895]	6666666.269962.peg.1241	666	697	636	452	178	193	249
locus_tag=F7O84_RS17900]	6666666.269962.peg.1242	1464	10726	11251	8710	2380	3470	4450
locus_tag=F7O84_RS17905]	6666666.269962.peg.1243	246	136	138	104	30	13	43
locus_tag=F7O84_RS17910]	6666666.269962.peg.1244	693	294	378	375	73	75	104
locus_tag=F7O84_RS17915]	6666666.269962.peg.1245	942	816	883	721	278	232	379
locus_tag=F7O84_RS17920]	6666666.269962.peg.1246	1335	4	15	2	3	7	10
locus_tag=F7O84_RS17925]	6666666.269962.peg.1247	813	5	8	4	2	0	4
locus_tag=F7O84_RS17930]	6666666.269962.peg.1248	1281	37	30	20	10	22	33
locus_tag=F7O84_RS17935]	6666666.269962.peg.1249	1866	182	141	123	64	57	90
locus_tag=F7O84_RS07830]	6666666.269962.peg.125	2100	99	64	65	32	34	42
locus_tag=F7O84_RS17940]	6666666.269962.peg.1250	1986	957	910	642	365	489	585
locus_tag=F7O84_RS17945]	6666666.269962.peg.1251	675	8	9	6	5	3	12
locus_tag=F7O84_RS17950]	6666666.269962.peg.1252	1374	22	40	26	12	8	17
locus_tag=F7O84_RS17955]	6666666.269962.peg.1253	984	19	17	27	2	2	10
locus_tag=F7O84_RS17960]	6666666.269962.peg.1254	2835	2700	2179	1950	448	681	735
locus_tag=F7O84_RS18870]	6666666.269962.peg.1255	324	78	98	70	28	23	32
locus_tag=F7O84_RS18865]	6666666.269962.peg.1256	711	12028	9700	9867	4768	4971	6752
locus_tag=F7O84_RS18860]	6666666.269962.peg.1257	2142	4787	4176	2740	848	1510	1889
locus_tag=F7O84_RS18855]	6666666.269962.peg.1258	540	619	697	474	116	82	167
locus_tag=F7O84_RS18850]	6666666.269962.peg.1259	738	528	590	432	100	94	136
locus_tag=F7O84_RS07825]	6666666.269962.peg.126	981	90	91	57	25	41	54
locus_tag=F7O84_RS18845]	6666666.269962.peg.1260	426	182	167	135	31	13	35
locus_tag=F7O84_RS18840]	6666666.269962.peg.1261	1203	8921	7840	5955	2033	3578	3902
locus_tag=F7O84_RS18835]	6666666.269962.peg.1262	1218	2924	2876	2260	960	1140	1703
locus_tag=F7O84_RS18830]	6666666.269962.peg.1263	444	599	518	303	141	180	216
locus_tag=F7O84_RS18825]	6666666.269962.peg.1264	465	1363	1736	1222	760	702	1228
locus_tag=F7O84_RS18820]	6666666.269962.peg.1265	1002	10495	10237	8937	2354	3532	4113
locus_tag=F7O84_RS18815]	6666666.269962.peg.1266	2565	6896	6053	5080	1525	1949	2576
locus_tag=F7O84_RS18810]	6666666.269962.peg.1267	159	16	19	5	2	2	10
locus_tag=F7O84_RS18805]	6666666.269962.peg.1268	576	31	54	52	14	11	26
locus_tag=F7O84_RS18800]	6666666.269962.peg.1269	528	1332	1321	1074	828	307	808
locus_tag=F7O84_RS07820]	6666666.269962.peg.127	849	8	21	12	4	6	7
locus_tag=F7O84_RS05620]	6666666.269962.peg.1270	177	0	0	0	0	0	0
locus_tag=F7O84_RS00025]	6666666.269962.peg.1271	123	2	0	0	0	0	0
locus_tag=F7O84_RS18795]	6666666.269962.peg.1272	1155	7938	6641	5561	1204	1930	2166
locus_tag=F7O84_RS18790]	6666666.269962.peg.1273	918	463	337	342	123	148	170
locus_tag=F7O84_RS18785]	6666666.269962.peg.1274	738	644	456	346	242	346	399
locus_tag=F7O84_RS18780]	6666666.269962.peg.1275	1284	238	195	165	88	101	153
locus_tag=F7O84_RS18775]	6666666.269962.peg.1276	1371	156	149	117	54	88	90
locus_tag=F7O84_RS18770]	6666666.269962.peg.1277	1041	1235	1130	932	306	423	523
locus_tag=F7O84_RS18765]	6666666.269962.peg.1278	2262	492	514	406	254	227	393
locus_tag=F7O84_RS18760]	6666666.269962.peg.1279	990	233	194	141	43	74	100
locus_tag=F7O84_RS07815]	6666666.269962.peg.128	864	27	17	9	3	3	7
locus_tag=F7O84_RS18755]	6666666.269962.peg.1280	1554	65	66	47	13	29	31
locus_tag=F7O84_RS18750]	6666666.269962.peg.1281	1983	54	35	31	15	13	23
locus_tag=F7O84_RS18745]	6666666.269962.peg.1282	2169	12	24	9	7	5	9
locus_tag=F7O84_RS18740]	6666666.269962.peg.1283	1692	21	7	7	8	12	9
locus_tag=F7O84_RS18735]	6666666.269962.peg.1284	873	0	0	0	2	3	2
locus_tag=F7O84_RS18730]	6666666.269962.peg.1285	957	0	1	1	2	0	1
locus_tag=F7O84_RS18725]	6666666.269962.peg.1286	864	26	19	15	2	5	10
locus_tag=F7O84_RS18720]	6666666.269962.peg.1287	3384	713	742	524	275	396	547
locus_tag=F7O84_RS18715]	6666666.269962.peg.1288	951	125	105	96	39	58	61
locus_tag=F7O84_RS18710]	6666666.269962.peg.1289	282	2	5	4	0	0	0
locus_tag=F7O84_RS07810]	6666666.269962.peg.129	750	21	10	3	10	7	8
locus_tag=F7O84_RS18705]	6666666.269962.peg.1290	1200	15874	17459	15135	6057	6984	9917
locus_tag=F7O84_RS18850]	6666666.269962.peg.1291	138	100	158	164	19	31	24
locus_tag=F7O84_RS18700]	6666666.269962.peg.1292	930	200	226	163	50	39	72
locus_tag=F7O84_RS18695]	6666666.269962.peg.1293	2739	828	704	521	142	231	252
locus_tag=F7O84_RS18690]	6666666.269962.peg.1294	525	43	41	52	25	33	30
locus_tag=F7O84_RS18685]	6666666.269962.peg.1295	873	113	101	75	56	55	97
locus_tag=F7O84_RS18680]	6666666.269962.peg.1296	453	265	268	230	80	87	119
locus_tag=F7O84_RS18675]	6666666.269962.peg.1297	684	369	287	223	141	129	170
locus_tag=F7O84_RS18670]	6666666.269962.peg.1298	612	376	319	228	95	154	152
locus_tag=F7O84_RS02080]	6666666.269962.peg.1299	129	377	370	195	96	174	199
locus_tag=F7O84_RS14750]	6666666.269962.peg.13	1410	37	49	43	15	11	11
locus_tag=F7O84_RS07805]	6666666.269962.peg.130	642	107	68	52	31	48	49
locus_tag=F7O84_RS02085]	6666666.269962.peg.1300	2481	295	313	285	74	133	110
locus_tag=F7O84_RS02090]	6666666.269962.peg.1301	675	46	51	53	11	28	22
locus_tag=F7O84_RS02095]	6666666.269962.peg.1302	1032	3521	3746	3423	443	882	854
locus_tag=F7O84_RS02100]	6666666.269962.peg.1303	672	1097	1333	1508	299	501	552
locus_tag=F7O84_RS02105]	6666666.269962.peg.1304	618	803	973	1640	215	375	310
locus_tag=F7O84_RS03430]	6666666.269962.peg.1305	1284	2564	2502	3253	3835	2665	3198
locus_tag=F7O84_RS00025]	6666666.269962.peg.1306	168	282	256	319	368	252	285
locus_tag=F7O84_RS02185]	6666666.269962.peg.1307	1542	2920	3023	3654	4304	3071	3581
locus_tag=F7O84_RS17440]	6666666.269962.peg.1308	987	1974	1867	2403	2617	1877	2312
locus_tag=F7O84_RS12450]	6666666.269962.peg.1309	669	1058	930	614	205	298	362
locus_tag=F7O84_RS07800]	6666666.269962.peg.131	669	42	7	12	24	19	31
locus_tag=F7O84_RS12445]	6666666.269962.peg.1310	219	306	233	212	59	88	105
locus_tag=F7O84_RS12440]	6666666.269962.peg.1311	804	1157	1071	740	303	331	468
locus_tag=F7O84_RS12435]	6666666.269962.peg.1312	453	235	152	122	54	64	75
locus_tag=F7O84_RS12430]	6666666.269962.peg.1313	1794	147	155	163	18	17	29
locus_tag=F7O84_RS12425]	6666666.269962.peg.1314	1419	166	252	252	81	22	81
locus_tag=F7O84_RS12420]	6666666.269962.peg.1315	1233	383	535	469	158	54	150
locus_tag=F7O84_RS12415]	6666666.269962.peg.1316	234	13492	13799	16144	3532	4982	5099
locus_tag=F7O84_RS12410]	6666666.269962.peg.1317	186	6	12	24	1	0	0
locus_tag=F7O84_RS12405]	6666666.269962.peg.1318	858	176	225	265	66	46	41
locus_tag=F7O84_RS12400]	6666666.269962.peg.1319	633	107	141	119	38	26	33
locus_tag=F7O84_RS07795]	6666666.269962.peg.132	1668	255	214	199	111	127	144
locus_tag=F7O84_RS12395]	6666666.269962.peg.1320	729	129	140	130	34	14	12
locus_tag=F7O84_RS12390]	6666666.269962.peg.1321	369	13	25	5	2	6	4
locus_tag=F7O84_RS12385]	6666666.269962.peg.1322	357	11	14	11	1	4	5
locus_tag=F7O84_RS12380]	6666666.269962.peg.1323	1539	2772	2568	1927	486	839	918
locus_tag=F7O84_RS12375]	6666666.269962.peg.1324	1245	493	393	335	118	241	262
locus_tag=F7O84_RS12370]	6666666.269962.peg.1325	2925	216	227	166	28	71	68
locus_tag=F7O84_RS12365]	6666666.269962.peg.1326	711	67	81	55	31	25	55
locus_tag=F7O84_RS12360]	6666666.269962.peg.1327	1314	379	364	246	135	141	235
locus_tag=F7O84_RS12355]	6666666.269962.peg.1328	2418	66	90	79	16	24	18
locus_tag=F7O84_RS12350]	6666666.269962.peg.1329	600	26	29	28	4	4	9
locus_tag=F7O84_RS07790]	6666666.269962.peg.133	378	24	28	14	16	13	26
locus_tag=F7O84_RS12345]	6666666.269962.peg.1330	810	480	593	434	130	160	223
locus_tag=F7O84_RS12340]	6666666.269962.peg.1331	582	277	225	209	35	65	86
locus_tag=F7O84_RS12335]	6666666.269962.peg.1332	744	150	188	112	31	33	87
locus_tag=F7O84_RS12330]	6666666.269962.peg.1333	891	261	281	173	47	71	89
locus_tag=F7O84_RS12325]	6666666.269962.peg.1334	513	197	117	101	39	58	77
locus_tag=F7O84_RS12320]	6666666.269962.peg.1335	1386	105	86	87	81	90	155
locus_tag=F7O84_RS12315]	6666666.269962.peg.1336	888	24	49	24	8	19	26
locus_tag=F7O84_RS12310]	6666666.269962.peg.1337	864	11	8	4	5	1	7
locus_tag=F7O84_RS12305]	6666666.269962.peg.1338	1551	35	37	24	10	12	28
locus_tag=F7O84_RS12300]	6666666.269962.peg.1339	1566	44	39	30	13	17	27
locus_tag=F7O84_RS07785]	6666666.269962.peg.134	873	177	195	167	48	41	62
locus_tag=F7O84_RS12295]	6666666.269962.peg.1340	978	1758	1479	1124	329	566	593
locus_tag=F7O84_RS12290]	6666666.269962.peg.1341	2736	2022	1727	1293	742	888	1251
locus_tag=F7O84_RS12285]	6666666.269962.peg.1342	1212	1079	1025	839	391	427	644
locus_tag=F7O84_RS12280]	6666666.269962.peg.1343	2049	1422	1090	815	571	719	983
locus_tag=F7O84_RS12275]	6666666.269962.peg.1344	1695	47	39	43	8	17	20
locus_tag=F7O84_RS12270]	6666666.269962.peg.1345	954	118	130	110	37	52	59
locus_tag=F7O84_RS12265]	6666666.269962.peg.1346	1917	638	553	407	107	190	200
locus_tag=F7O84_RS12260]	6666666.269962.peg.1347	1209	2103	1874	1107	359	528	722
locus_tag=F7O84_RS12255]	6666666.269962.peg.1348	309	49	51	33	35	40	52
locus_tag=F7O84_RS12250]	6666666.269962.peg.1349	2769	2666	2520	2071	547	883	914
locus_tag=F7O84_RS07780]	6666666.269962.peg.135	2925	2267	2411	1674	493	473	860
locus_tag=F7O84_RS12245]	6666666.269962.peg.1350	1014	2275	1463	1109	794	1059	1163
locus_tag=F7O84_RS12240]	6666666.269962.peg.1351	1332	3589	3582	2872	1547	1578	2534
locus_tag=F7O84_RS12235]	6666666.269962.peg.1352	2445	558	511	333	84	162	191
locus_tag=F7O84_RS12230]	6666666.269962.peg.1353	987	2	4	3	4	2	5
locus_tag=F7O84_RS12225]	6666666.269962.peg.1354	906	5	11	6	2	1	5
locus_tag=F7O84_RS12220]	6666666.269962.peg.1355	960	1	3	3	4	2	5
locus_tag=F7O84_RS12215]	6666666.269962.peg.1356	1548	37	39	27	23	49	50
locus_tag=F7O84_RS12210]	6666666.269962.peg.1357	2766	74	64	51	19	21	23
locus_tag=F7O84_RS12205]	6666666.269962.peg.1358	2340	68	58	52	17	33	34
locus_tag=F7O84_RS12200]	6666666.269962.peg.1359	1602	19685	16761	11650	3691	6295	7809
locus_tag=F7O84_RS07775]	6666666.269962.peg.136	906	907	809	569	316	472	614
locus_tag=F7O84_RS12195]	6666666.269962.peg.1360	2100	14264	12091	9174	2968	4765	5482
locus_tag=F7O84_RS12190]	6666666.269962.peg.1361	1857	833	765	579	196	232	339
locus_tag=F7O84_RS12185]	6666666.269962.peg.1362	930	1541	1546	1315	407	549	601
locus_tag=F7O84_RS12180]	6666666.269962.peg.1363	933	285	194	175	175	169	189
locus_tag=F7O84_RS12175]	6666666.269962.peg.1364	912	1175	1033	1117	361	519	537
locus_tag=F7O84_RS12170]	6666666.269962.peg.1365	879	1236	985	859	491	472	680
locus_tag=F7O84_RS12165]	6666666.269962.peg.1366	963	494	382	415	223	310	331
locus_tag=F7O84_RS12160]	6666666.269962.peg.1367	261	660	565	774	412	537	421
locus_tag=F7O84_RS12155]	6666666.269962.peg.1368	948	654	627	598	265	305	360
locus_tag=F7O84_RS12150]	6666666.269962.peg.1369	867	4771	3666	3026	2145	3245	3728
locus_tag=F7O84_RS07770]	6666666.269962.peg.137	762	1084	948	772	135	226	245
locus_tag=F7O84_RS12145]	6666666.269962.peg.1370	1770	161	137	156	121	183	230
locus_tag=F7O84_RS12140]	6666666.269962.peg.1371	1407	88	80	57	46	82	112
locus_tag=F7O84_RS12135]	6666666.269962.peg.1372	1002	240	215	208	67	68	90
locus_tag=F7O84_RS12130]	6666666.269962.peg.1373	729	241	224	292	79	110	128
locus_tag=F7O84_RS12125]	6666666.269962.peg.1374	363	919	738	639	236	325	402
locus_tag=F7O84_RS12120]	6666666.269962.peg.1375	525	7925	8148	7501	788	1295	1551
locus_tag=F7O84_RS12115]	6666666.269962.peg.1376	879	46	50	36	38	32	38
locus_tag=F7O84_RS12110]	6666666.269962.peg.1377	786	138	104	81	39	46	54
locus_tag=F7O84_RS12105]	6666666.269962.peg.1378	231	128	122	103	61	66	68
locus_tag=F7O84_RS02155]	6666666.269962.peg.1379	123	7	4	5	0	0	0
locus_tag=F7O84_RS07765]	6666666.269962.peg.138	582	362	322	265	122	65	169
locus_tag=F7O84_RS12100]	6666666.269962.peg.1380	1146	854	711	525	226	367	401
locus_tag=F7O84_RS12095]	6666666.269962.peg.1381	1197	3398	3564	3163	553	767	948
locus_tag=F7O84_RS12085]	6666666.269962.peg.1382	705	351	282	246	58	88	87
locus_tag=F7O84_RS12080]	6666666.269962.peg.1383	837	851	711	553	186	273	380
locus_tag=F7O84_RS12075]	6666666.269962.peg.1384	1920	177	134	116	70	74	105
locus_tag=F7O84_RS12070]	6666666.269962.peg.1385	327	24	23	13	7	8	4
locus_tag=F7O84_RS12065]	6666666.269962.peg.1386	306	21	21	20	19	15	19
locus_tag=F7O84_RS12060]	6666666.269962.peg.1387	1278	183	199	181	71	85	136
locus_tag=F7O84_RS12055]	6666666.269962.peg.1388	2289	90	107	76	33	31	62
locus_tag=F7O84_RS12050]	6666666.269962.peg.1389	714	1350	1008	693	349	382	758
locus_tag=F7O84_RS07760]	6666666.269962.peg.139	1392	5571	4986	4358	1295	1633	2152
locus_tag=F7O84_RS12045]	6666666.269962.peg.1390	1071	792	862	567	235	204	328
locus_tag=F7O84_RS12040]	6666666.269962.peg.1391	798	1152	1159	910	209	331	412
locus_tag=F7O84_RS12035]	6666666.269962.peg.1392	1083	604	478	310	112	162	218
locus_tag=F7O84_RS12030]	6666666.269962.peg.1393	996	67	77	82	18	7	26
locus_tag=F7O84_RS12025]	6666666.269962.peg.1394	1092	3246	2710	2026	743	989	1270
locus_tag=F7O84_RS12020]	6666666.269962.peg.1395	420	824	710	642	140	208	213
locus_tag=F7O84_RS12015]	6666666.269962.peg.1396	948	2077	1641	1384	680	841	1019
locus_tag=F7O84_RS12010]	6666666.269962.peg.1397	489	161	225	213	68	21	72
locus_tag=F7O84_RS12005]	6666666.269962.peg.1398	1053	577	640	463	281	181	403
locus_tag=F7O84_RS12000]	6666666.269962.peg.1399	2190	475	551	400	118	101	180
locus_tag=F7O84_RS14745]	6666666.269962.peg.14	591	48	50	46	14	11	22
locus_tag=F7O84_RS07755]	6666666.269962.peg.140	2628	17556	14375	10591	5878	10031	11932
locus_tag=F7O84_RS11995]	6666666.269962.peg.1400	1569	1303	1337	1131	188	239	373
locus_tag=F7O84_RS11990]	6666666.269962.peg.1401	921	959	839	557	132	185	263
locus_tag=F7O84_RS11985]	6666666.269962.peg.1402	840	1949	1828	1433	294	459	536
locus_tag=F7O84_RS11980]	6666666.269962.peg.1403	1896	211	298	301	22	27	33
locus_tag=F7O84_RS11975]	6666666.269962.peg.1404	999	577	570	479	140	150	214
locus_tag=F7O84_RS11970]	6666666.269962.peg.1405	768	720	636	549	142	136	238
locus_tag=F7O84_RS11965]	6666666.269962.peg.1406	1038	150	191	184	16	8	14
locus_tag=F7O84_RS11960]	6666666.269962.peg.1407	765	137	133	130	37	22	49
locus_tag=F7O84_RS11955]	6666666.269962.peg.1408	918	406	258	284	174	148	194
locus_tag=F7O84_RS11950]	6666666.269962.peg.1409	2067	2419	2453	2240	728	713	1039
locus_tag=F7O84_RS07750]	6666666.269962.peg.141	336	294	279	225	82	164	181
locus_tag=F7O84_RS11945]	6666666.269962.peg.1410	1212	3077	3086	2822	815	1051	1392
locus_tag=F7O84_RS11940]	6666666.269962.peg.1411	783	334	387	323	84	63	109
locus_tag=F7O84_RS11935]	6666666.269962.peg.1412	732	381	302	230	128	139	185
locus_tag=F7O84_RS11930]	6666666.269962.peg.1413	786	532	563	553	117	137	166
locus_tag=F7O84_RS11925]	6666666.269962.peg.1414	696	897	739	615	253	293	406
locus_tag=F7O84_RS11920]	6666666.269962.peg.1415	1065	1892	1501	1164	406	528	733
locus_tag=F7O84_RS11915]	6666666.269962.peg.1416	1221	759	891	729	309	195	498
locus_tag=F7O84_RS11910]	6666666.269962.peg.1417	2286	416	438	423	89	46	97
locus_tag=F7O84_RS11905]	6666666.269962.peg.1418	1161	300	303	297	105	84	123
locus_tag=F7O84_RS11900]	6666666.269962.peg.1419	1008	337	393	398	212	132	213
locus_tag=F7O84_RS07745]	6666666.269962.peg.142	273	29	26	17	5	13	16
locus_tag=F7O84_RS11895]	6666666.269962.peg.1420	1131	1251	1422	1085	257	264	460
locus_tag=F7O84_RS11890]	6666666.269962.peg.1421	570	567	420	365	156	182	257
locus_tag=F7O84_RS11885]	6666666.269962.peg.1422	1086	192	241	241	14	17	23
locus_tag=F7O84_RS11880]	6666666.269962.peg.1423	888	133	189	201	5	18	8
locus_tag=F7O84_RS11875]	6666666.269962.peg.1424	810	1132	990	830	230	227	332
locus_tag=F7O84_RS11870]	6666666.269962.peg.1425	1056	510	555	497	126	53	139
locus_tag=F7O84_RS11865]	6666666.269962.peg.1426	1524	221	245	257	26	16	27
locus_tag=F7O84_RS11860]	6666666.269962.peg.1427	669	25	30	43	20	17	20
locus_tag=F7O84_RS11855]	6666666.269962.peg.1428	1419	453	454	427	168	164	218
locus_tag=F7O84_RS11850]	6666666.269962.peg.1429	1290	924	1015	963	429	297	612
locus_tag=F7O84_RS07740]	6666666.269962.peg.143	222	19	7	12	4	10	13
locus_tag=F7O84_RS11845]	6666666.269962.peg.1430	951	2310	2121	1712	433	510	788
locus_tag=F7O84_RS11840]	6666666.269962.peg.1431	1068	5912	5996	4948	1460	1857	2625
locus_tag=F7O84_RS11835]	6666666.269962.peg.1432	1104	400	337	268	139	141	212
locus_tag=F7O84_RS11830]	6666666.269962.peg.1433	1725	3653	3225	2666	829	1234	1416
locus_tag=F7O84_RS11825]	6666666.269962.peg.1434	747	2150	2015	1376	370	562	818
locus_tag=F7O84_RS11820]	6666666.269962.peg.1435	1434	2777	3024	2424	424	593	799
locus_tag=F7O84_RS11815]	6666666.269962.peg.1436	3303	38057	36597	32259	11188	15931	17668
locus_tag=F7O84_RS11810]	6666666.269962.peg.1437	2421	2561	2346	2023	853	1112	1360
locus_tag=F7O84_RS11805]	6666666.269962.peg.1438	1077	4303	4055	3002	1716	1553	2975
locus_tag=F7O84_RS11800]	6666666.269962.peg.1439	870	3059	2903	2228	726	942	1354
locus_tag=F7O84_RS07735]	6666666.269962.peg.144	582	464	448	286	72	151	152
locus_tag=F7O84_RS11795]	6666666.269962.peg.1440	552	2218	1854	1417	722	976	1254
locus_tag=F7O84_RS11790]	6666666.269962.peg.1441	816	2013	2021	1529	412	627	773
locus_tag=F7O84_RS11785]	6666666.269962.peg.1442	1272	506	552	445	206	218	350
locus_tag=F7O84_RS11780]	6666666.269962.peg.1443	894	299	258	221	123	126	161
locus_tag=F7O84_RS11775]	6666666.269962.peg.1444	2925	1853	1556	1257	571	522	804
locus_tag=F7O84_RS11770]	6666666.269962.peg.1445	396	69	75	64	17	3	22
locus_tag=F7O84_RS11765]	6666666.269962.peg.1446	936	1987	1974	1679	313	470	604
locus_tag=F7O84_RS11760]	6666666.269962.peg.1447	813	732	683	494	247	197	338
locus_tag=F7O84_RS11755]	6666666.269962.peg.1448	873	367	354	349	97	67	142
locus_tag=F7O84_RS11750]	6666666.269962.peg.1449	1470	514	630	480	171	101	187
locus_tag=F7O84_RS07730]	6666666.269962.peg.145	537	50	48	50	13	18	26
locus_tag=F7O84_RS11745]	6666666.269962.peg.1450	405	424	360	305	108	136	184
locus_tag=F7O84_RS11740]	6666666.269962.peg.1451	648	1033	866	710	181	230	328
locus_tag=F7O84_RS11735]	6666666.269962.peg.1452	1611	1779	1468	1084	605	692	1045
locus_tag=F7O84_RS11730]	6666666.269962.peg.1453	699	393	358	272	129	137	252
locus_tag=F7O84_RS11725]	6666666.269962.peg.1454	675	184	235	188	79	53	109
locus_tag=F7O84_RS11720]	6666666.269962.peg.1455	726	720	537	395	174	194	281
locus_tag=F7O84_RS11715]	6666666.269962.peg.1456	1614	532	507	421	140	121	213
locus_tag=F7O84_RS11710]	6666666.269962.peg.1457	2022	1864	1786	1420	473	460	710
locus_tag=F7O84_RS11705]	6666666.269962.peg.1458	1632	2857	2772	2134	801	927	1303
locus_tag=F7O84_RS11700]	6666666.269962.peg.1459	969	801	700	583	99	189	193
locus_tag=F7O84_RS07725]	6666666.269962.peg.146	450	5	6	5	0	1	1
locus_tag=F7O84_RS11695]	6666666.269962.peg.1460	1434	2940	2571	1986	483	543	843
locus_tag=F7O84_RS11690]	6666666.269962.peg.1461	1116	3954	3378	2555	1065	978	1720
locus_tag=F7O84_RS11685]	6666666.269962.peg.1462	918	134	130	122	45	64	57
locus_tag=F7O84_RS11680]	6666666.269962.peg.1463	1482	8184	6974	6580	1215	2095	2024
locus_tag=F7O84_RS10560]	6666666.269962.peg.1464	1713	310	249	206	115	173	209
locus_tag=F7O84_RS10555]	6666666.269962.peg.1465	1326	2	6	4	1	5	4
locus_tag=F7O84_RS10550]	6666666.269962.peg.1466	912	12	4	7	4	3	1
locus_tag=F7O84_RS10545]	6666666.269962.peg.1467	894	1	5	10	7	2	2
locus_tag=F7O84_RS10540]	6666666.269962.peg.1468	1608	14	12	15	7	9	15
locus_tag=F7O84_RS10535]	6666666.269962.peg.1469	1017	231	170	182	65	90	103
locus_tag=F7O84_RS07715]	6666666.269962.peg.147	750	15	22	25	3	9	8
locus_tag=F7O84_RS10530]	6666666.269962.peg.1470	2046	1726	1550	1274	437	727	869
locus_tag=F7O84_RS10525]	6666666.269962.peg.1471	1695	179	184	194	58	90	127
locus_tag=F7O84_RS10520]	6666666.269962.peg.1472	348	379	355	400	122	203	167
locus_tag=F7O84_RS10515]	6666666.269962.peg.1473	834	1462	1074	904	533	832	932
locus_tag=F7O84_RS10510]	6666666.269962.peg.1474	270	1	2	2	0	2	1
locus_tag=F7O84_RS10505]	6666666.269962.peg.1475	1359	3	2	1	0	0	1
locus_tag=F7O84_RS10495]	6666666.269962.peg.1476	486	0	3	6	1	0	0
locus_tag=F7O84_RS10490]	6666666.269962.peg.1477	798	0	1	2	1	1	0
locus_tag=F7O84_RS10485]	6666666.269962.peg.1478	474	1	1	3	1	1	1
locus_tag=F7O84_RS10480]	6666666.269962.peg.1479	1833	7	8	10	1	4	2
locus_tag=F7O84_RS07710]	6666666.269962.peg.148	549	109	103	70	20	26	36
locus_tag=F7O84_RS10475]	6666666.269962.peg.1480	213	0	0	0	0	0	0
locus_tag=F7O84_RS10470]	6666666.269962.peg.1481	867	4	2	2	0	3	1
locus_tag=F7O84_RS10465]	6666666.269962.peg.1482	462	1	0	0	1	1	1
locus_tag=F7O84_RS10460]	6666666.269962.peg.1483	294	0	1	1	0	0	0
locus_tag=F7O84_RS10455]	6666666.269962.peg.1484	159	0	2	4	0	3	1
locus_tag=F7O84_RS10450]	6666666.269962.peg.1485	2364	4	24	27	2	9	3
locus_tag=F7O84_RS10445]	6666666.269962.peg.1486	2004	3	0	15	0	4	2
locus_tag=F7O84_RS10440]	6666666.269962.peg.1487	270	0	0	0	0	0	1
locus_tag=F7O84_RS10435]	6666666.269962.peg.1488	678	9	12	10	3	6	6
locus_tag=F7O84_RS10425]	6666666.269962.peg.1489	471	12	12	17	5	9	16
locus_tag=F7O84_RS11625]	6666666.269962.peg.149	1380	270	277	261	59	56	94
locus_tag=F7O84_RS10420]	6666666.269962.peg.1490	588	15	12	26	9	18	16
locus_tag=F7O84_RS10415]	6666666.269962.peg.1491	183	7	15	26	2	10	7
locus_tag=F7O84_RS10405]	6666666.269962.peg.1492	621	371	482	413	135	113	246
locus_tag=F7O84_RS10400]	6666666.269962.peg.1493	1143	287	336	225	101	66	165
locus_tag=F7O84_RS10390]	6666666.269962.peg.1494	1401	184	243	344	68	163	103
locus_tag=F7O84_RS10385]	6666666.269962.peg.1495	573	186	197	188	30	59	68
locus_tag=F7O84_RS10380]	6666666.269962.peg.1496	726	116	119	111	31	29	72
locus_tag=F7O84_RS10430]	6666666.269962.peg.1497	462	0	0	0	0	0	1
locus_tag=F7O84_RS10370]	6666666.269962.peg.1498	156	2	0	3	1	0	0
locus_tag=F7O84_RS10360]	6666666.269962.peg.1499	264	13	15	19	4	18	8
locus_tag=F7O84_RS14740]	6666666.269962.peg.15	441	148	183	105	91	63	118
locus_tag=F7O84_RS11620]	6666666.269962.peg.150	822	89	48	45	17	49	45
locus_tag=F7O84_RS10355]	6666666.269962.peg.1500	1674	555	601	630	168	243	237
locus_tag=F7O84_RS10350]	6666666.269962.peg.1501	639	7	12	5	28	14	21
locus_tag=F7O84_RS10345]	6666666.269962.peg.1502	201	8	7	6	11	1	10
locus_tag=F7O84_RS10340]	6666666.269962.peg.1503	342	68	104	91	17	10	30
locus_tag=F7O84_RS10330]	6666666.269962.peg.1504	300	352	290	216	38	79	100
locus_tag=F7O84_RS10325]	6666666.269962.peg.1505	261	0	3	2	1	0	0
locus_tag=F7O84_RS10320]	6666666.269962.peg.1506	1668	65	73	45	14	34	33
locus_tag=F7O84_RS10315]	6666666.269962.peg.1507	1302	1988	2195	1700	364	425	650
locus_tag=F7O84_RS10310]	6666666.269962.peg.1508	1287	1	12	2	1	2	2
locus_tag=F7O84_RS10305]	6666666.269962.peg.1509	873	84	98	80	24	19	28
locus_tag=F7O84_RS11615]	6666666.269962.peg.151	1164	2038	1568	1271	799	1033	1188
locus_tag=F7O84_RS10300]	6666666.269962.peg.1510	471	45	53	29	16	18	26
locus_tag=F7O84_RS10295]	6666666.269962.peg.1511	894	107	117	99	30	31	58
locus_tag=F7O84_RS10290]	6666666.269962.peg.1512	942	342	358	369	118	199	177
locus_tag=F7O84_RS10285]	6666666.269962.peg.1513	831	480	530	448	108	139	139
locus_tag=F7O84_RS10280]	6666666.269962.peg.1514	438	305	308	212	65	42	96
locus_tag=F7O84_RS10275]	6666666.269962.peg.1515	774	846	922	806	130	140	242
locus_tag=F7O84_RS10270]	6666666.269962.peg.1516	2433	185	147	121	38	58	51
locus_tag=F7O84_RS10265]	6666666.269962.peg.1517	1368	78	92	71	56	75	94
locus_tag=F7O84_RS10260]	6666666.269962.peg.1518	2100	12	17	16	8	10	11
locus_tag=F7O84_RS10255]	6666666.269962.peg.1519	444	5	3	1	2	3	5
locus_tag=F7O84_RS06990]	6666666.269962.peg.152	159	36	52	34	15	7	18
locus_tag=F7O84_RS10250]	6666666.269962.peg.1520	930	6	10	9	9	14	8
locus_tag=F7O84_RS10245]	6666666.269962.peg.1521	1263	54	36	36	44	39	64
locus_tag=F7O84_RS10240]	6666666.269962.peg.1522	264	14	5	3	6	9	12
locus_tag=F7O84_RS10235]	6666666.269962.peg.1523	1323	15	19	9	9	9	11
locus_tag=F7O84_RS10230]	6666666.269962.peg.1524	612	67	62	56	17	33	29
locus_tag=F7O84_RS10225]	6666666.269962.peg.1525	468	45	36	25	10	13	19
locus_tag=F7O84_RS10220]	6666666.269962.peg.1526	1377	373	308	260	84	131	151
locus_tag=F7O84_RS10215]	6666666.269962.peg.1527	909	592	627	460	163	252	362
locus_tag=F7O84_RS10210]	6666666.269962.peg.1528	1725	14	9	7	16	29	15
locus_tag=F7O84_RS10205]	6666666.269962.peg.1529	1602	38	27	25	31	42	60
locus_tag=F7O84_RS11610]	6666666.269962.peg.153	465	1256	1356	1259	117	257	258
locus_tag=F7O84_RS10200]	6666666.269962.peg.1530	1371	305	280	255	86	179	176
locus_tag=F7O84_RS10195]	6666666.269962.peg.1531	879	58	50	39	15	20	32
locus_tag=F7O84_RS10190]	6666666.269962.peg.1532	828	20	14	23	14	16	20
locus_tag=F7O84_RS10185]	6666666.269962.peg.1533	1854	72	106	47	36	42	71
locus_tag=F7O84_RS10180]	6666666.269962.peg.1534	165	3	1	3	1	2	3
locus_tag=F7O84_RS10175]	6666666.269962.peg.1535	1191	16558	12803	9048	7100	11224	13691
locus_tag=F7O84_RS10170]	6666666.269962.peg.1536	888	1190	1510	1419	240	362	437
locus_tag=F7O84_RS10165]	6666666.269962.peg.1537	972	995	969	791	281	324	453
locus_tag=F7O84_RS10160]	6666666.269962.peg.1538	759	3005	2534	1885	675	935	1216
locus_tag=F7O84_RS10155]	6666666.269962.peg.1539	711	3250	2699	1975	665	1297	1416
locus_tag=F7O84_RS11610]	6666666.269962.peg.154	390	622	600	590	99	158	154
locus_tag=F7O84_RS10150]	6666666.269962.peg.1540	627	2851	2611	2116	965	1341	1513
locus_tag=F7O84_RS10145]	6666666.269962.peg.1541	315	228	228	209	41	65	105
locus_tag=F7O84_RS10140]	6666666.269962.peg.1542	1089	749	855	671	313	295	471
locus_tag=F7O84_RS11980]	6666666.269962.peg.1543	120	0	0	0	0	0	1
locus_tag=F7O84_RS10135]	6666666.269962.peg.1544	1518	919	828	707	304	349	534
locus_tag=F7O84_RS10130]	6666666.269962.peg.1545	1530	358	383	302	123	111	204
locus_tag=F7O84_RS10125]	6666666.269962.peg.1546	2814	89	82	77	50	84	75
locus_tag=F7O84_RS10120]	6666666.269962.peg.1547	777	60	61	51	34	46	43
locus_tag=F7O84_RS10115]	6666666.269962.peg.1548	273	39	23	14	14	24	25
locus_tag=F7O84_RS10110]	6666666.269962.peg.1549	798	197	150	156	127	96	121
locus_tag=F7O84_RS08680]	6666666.269962.peg.155	171	51	46	69	1	3	3
locus_tag=F7O84_RS10105]	6666666.269962.peg.1550	978	893	701	589	541	657	698
locus_tag=F7O84_RS10100]	6666666.269962.peg.1551	1512	544	611	459	185	359	366
locus_tag=F7O84_RS10095]	6666666.269962.peg.1552	747	97	56	42	29	35	46
locus_tag=F7O84_RS10090]	6666666.269962.peg.1553	678	293	246	172	121	199	193
locus_tag=F7O84_RS10085]	6666666.269962.peg.1554	468	166	181	91	71	80	135
locus_tag=F7O84_RS10990]	6666666.269962.peg.1555	132	68	67	32	45	67	77
locus_tag=F7O84_RS10080]	6666666.269962.peg.1556	1770	40	63	37	22	18	32
locus_tag=F7O84_RS10075]	6666666.269962.peg.1557	1590	76	74	56	28	26	37
locus_tag=F7O84_RS10070]	6666666.269962.peg.1558	1716	220	196	148	73	118	129
locus_tag=F7O84_RS10065]	6666666.269962.peg.1559	978	26	31	18	11	19	13
locus_tag=F7O84_RS11605]	6666666.269962.peg.156	747	3164	3343	2731	962	1051	1714
locus_tag=F7O84_RS10060]	6666666.269962.peg.1560	909	39	26	37	7	11	14
locus_tag=F7O84_RS10055]	6666666.269962.peg.1561	1137	88	51	62	16	30	30
locus_tag=F7O84_RS10050]	6666666.269962.peg.1562	1551	140	111	101	38	52	52
locus_tag=F7O84_RS10045]	6666666.269962.peg.1563	1533	224	205	116	81	109	138
locus_tag=F7O84_RS10040]	6666666.269962.peg.1564	2706	1203	933	767	335	492	562
locus_tag=F7O84_RS10035]	6666666.269962.peg.1565	1239	742	694	559	114	189	226
locus_tag=F7O84_RS10030]	6666666.269962.peg.1566	699	549	400	334	118	196	239
locus_tag=F7O84_RS10025]	6666666.269962.peg.1567	1005	1148	1000	708	225	322	430
locus_tag=F7O84_RS10020]	6666666.269962.peg.1568	597	1988	1751	1363	533	725	1038
locus_tag=F7O84_RS10015]	6666666.269962.peg.1569	663	1963	1695	1397	424	517	706
locus_tag=F7O84_RS11600]	6666666.269962.peg.157	552	558	506	476	79	138	151
locus_tag=F7O84_RS10010]	6666666.269962.peg.1570	732	2895	2512	2155	440	757	851
locus_tag=F7O84_RS10005]	6666666.269962.peg.1571	894	2788	2639	2159	705	1022	1137
locus_tag=F7O84_RS10000]	6666666.269962.peg.1572	732	2181	2005	1440	196	285	342
locus_tag=F7O84_RS09995]	6666666.269962.peg.1573	540	16	17	22	3	6	12
locus_tag=F7O84_RS09990]	6666666.269962.peg.1574	2712	453	413	367	145	221	244
locus_tag=F7O84_RS09985]	6666666.269962.peg.1575	633	287	290	243	68	52	126
locus_tag=F7O84_RS09980]	6666666.269962.peg.1576	795	83	43	37	39	50	60
locus_tag=F7O84_RS09975]	6666666.269962.peg.1577	279	106	117	102	25	48	32
locus_tag=F7O84_RS09970]	6666666.269962.peg.1578	1665	536	524	411	145	248	222
locus_tag=F7O84_RS09965]	6666666.269962.peg.1579	639	193	158	153	65	103	111
locus_tag=F7O84_RS11595]	6666666.269962.peg.158	528	188	138	99	55	65	81
locus_tag=F7O84_RS09960]	6666666.269962.peg.1580	393	91	86	40	59	62	78
locus_tag=F7O84_RS09955]	6666666.269962.peg.1581	1821	677	670	597	178	313	296
locus_tag=F7O84_RS09950]	6666666.269962.peg.1582	309	51	39	22	19	17	35
locus_tag=F7O84_RS09945]	6666666.269962.peg.1583	996	217	140	136	83	100	110
locus_tag=F7O84_RS09940]	6666666.269962.peg.1584	600	222	211	141	37	29	53
locus_tag=F7O84_RS09935]	6666666.269962.peg.1585	996	8	10	6	0	5	4
locus_tag=F7O84_RS09930]	6666666.269962.peg.1586	1296	94	95	54	17	14	36
locus_tag=F7O84_RS09925]	6666666.269962.peg.1587	1395	127	137	106	35	24	35
locus_tag=F7O84_RS09920]	6666666.269962.peg.1588	873	297	268	209	57	58	94
locus_tag=F7O84_RS09915]	6666666.269962.peg.1589	504	13962	13088	9534	4080	6279	9439
locus_tag=F7O84_RS03215]	6666666.269962.peg.159	1437	774	653	532	530	669	841
locus_tag=F7O84_RS09910]	6666666.269962.peg.1590	477	0	0	0	1	0	1
locus_tag=F7O84_RS12205]	6666666.269962.peg.1591	210	0	0	0	0	0	0
locus_tag=F7O84_RS09900]	6666666.269962.peg.1592	249	31	38	40	15	4	22
locus_tag=F7O84_RS09895]	6666666.269962.peg.1593	336	143	167	160	30	35	50
locus_tag=F7O84_RS09890]	6666666.269962.peg.1594	1155	20	21	22	6	11	10
locus_tag=F7O84_RS09885]	6666666.269962.peg.1595	426	14	15	9	4	7	7
locus_tag=F7O84_RS09880]	6666666.269962.peg.1596	1437	481	516	344	175	111	290
locus_tag=F7O84_RS09875]	6666666.269962.peg.1597	294	0	0	1	0	0	0
locus_tag=F7O84_RS09870]	6666666.269962.peg.1598	1131	4	14	9	4	5	10
locus_tag=F7O84_RS09865]	6666666.269962.peg.1599	2886	257	302	314	17	19	28
locus_tag=F7O84_RS14735]	6666666.269962.peg.16	990	381	436	401	197	148	275
locus_tag=F7O84_RS03220]	6666666.269962.peg.160	723	305	327	226	204	195	274
locus_tag=F7O84_RS09860]	6666666.269962.peg.1600	660	31	49	44	0	4	2
locus_tag=F7O84_RS09855]	6666666.269962.peg.1601	1059	500	405	347	101	215	221
locus_tag=F7O84_RS09850]	6666666.269962.peg.1602	1725	257	248	173	58	76	72
locus_tag=F7O84_RS09845]	6666666.269962.peg.1603	2382	2671	2497	2462	722	1055	1137
locus_tag=F7O84_RS09840]	6666666.269962.peg.1604	738	58	46	48	44	48	64
locus_tag=F7O84_RS09835]	6666666.269962.peg.1605	1878	460	379	358	214	267	284
locus_tag=F7O84_RS09830]	6666666.269962.peg.1606	861	446	266	255	181	223	218
locus_tag=F7O84_RS09825]	6666666.269962.peg.1607	291	58	61	31	52	35	64
locus_tag=F7O84_RS01515]	6666666.269962.peg.1608	1017	88	93	102	19	33	28
locus_tag=F7O84_RS01510]	6666666.269962.peg.1609	456	8	17	13	2	1	5
locus_tag=F7O84_RS03225]	6666666.269962.peg.161	402	461	456	450	221	308	354
locus_tag=F7O84_RS01505]	6666666.269962.peg.1610	417	15	17	12	4	1	8
locus_tag=F7O84_RS01500]	6666666.269962.peg.1611	624	24	17	12	7	2	6
locus_tag=F7O84_RS07465]	6666666.269962.peg.1612	162	3	7	2	1	1	1
locus_tag=F7O84_RS01495]	6666666.269962.peg.1613	720	44	36	32	14	19	30
locus_tag=F7O84_RS01490]	6666666.269962.peg.1614	438	170	82	79	48	63	77
locus_tag=F7O84_RS01485]	6666666.269962.peg.1615	336	14	11	11	9	2	6
locus_tag=F7O84_RS01480]	6666666.269962.peg.1616	1374	1437	1770	1307	646	533	1089
locus_tag=F7O84_RS00625]	6666666.269962.peg.1617	147	102	102	71	47	50	83
locus_tag=F7O84_RS01475]	6666666.269962.peg.1618	1344	723	609	490	187	230	298
locus_tag=F7O84_RS01470]	6666666.269962.peg.1619	1401	4626	4383	3679	1113	1595	1967
locus_tag=F7O84_RS03230]	6666666.269962.peg.162	1152	754	736	770	501	742	776
locus_tag=F7O84_RS01465]	6666666.269962.peg.1620	2019	979	851	626	156	225	310
locus_tag=F7O84_RS01460]	6666666.269962.peg.1621	2643	5975	4994	3580	956	1340	1792
locus_tag=F7O84_RS01455]	6666666.269962.peg.1622	1167	45	50	55	9	4	19
locus_tag=F7O84_RS01450]	6666666.269962.peg.1623	1140	50	31	23	7	6	21
locus_tag=F7O84_RS01445]	6666666.269962.peg.1624	942	53	49	33	15	12	23
locus_tag=F7O84_RS01440]	6666666.269962.peg.1625	879	809	707	646	25	25	43
locus_tag=F7O84_RS01435]	6666666.269962.peg.1626	903	1081	1006	792	26	52	39
locus_tag=F7O84_RS01430]	6666666.269962.peg.1627	1200	953	858	715	30	34	38
locus_tag=F7O84_RS01425]	6666666.269962.peg.1628	630	190	183	124	95	61	158
locus_tag=F7O84_RS01420]	6666666.269962.peg.1629	618	101	81	69	37	39	38
locus_tag=F7O84_RS03235]	6666666.269962.peg.163	1413	7451	7081	5796	2783	4978	4966
locus_tag=F7O84_RS01415]	6666666.269962.peg.1630	696	37	22	39	12	9	15
locus_tag=F7O84_RS01415]	6666666.269962.peg.1631	132	0	1	0	0	0	0
locus_tag=F7O84_RS01410]	6666666.269962.peg.1632	345	3393	3208	2382	825	1077	1560
locus_tag=F7O84_RS01405]	6666666.269962.peg.1633	1470	707	644	463	160	163	245
locus_tag=F7O84_RS01400]	6666666.269962.peg.1634	840	4268	3767	3050	1536	1603	2514
locus_tag=F7O84_RS01395]	6666666.269962.peg.1635	1662	7664	7361	5841	1950	2509	3274
locus_tag=F7O84_RS01390]	6666666.269962.peg.1636	1494	596	568	434	71	81	157
locus_tag=F7O84_RS01385]	6666666.269962.peg.1637	1452	4879	4971	4064	831	1356	1514
locus_tag=F7O84_RS01380]	6666666.269962.peg.1638	186	62	45	31	4	2	10
locus_tag=F7O84_RS01375]	6666666.269962.peg.1639	201	23	40	30	3	1	1
locus_tag=F7O84_RS03240]	6666666.269962.peg.164	915	484	437	321	144	154	227
locus_tag=F7O84_RS01370]	6666666.269962.peg.1640	417	198	226	159	51	40	64
locus_tag=F7O84_RS01365]	6666666.269962.peg.1641	696	908	899	557	216	268	458
locus_tag=F7O84_RS01360]	6666666.269962.peg.1642	1479	30	47	36	63	65	87
locus_tag=F7O84_RS01355]	6666666.269962.peg.1643	1167	13	18	25	46	39	46
locus_tag=F7O84_RS01350]	6666666.269962.peg.1644	1065	73	62	53	19	21	29
locus_tag=F7O84_RS01345]	6666666.269962.peg.1645	1611	56	53	34	16	25	38
locus_tag=F7O84_RS01340]	6666666.269962.peg.1646	924	1	2	1	0	0	0
locus_tag=F7O84_RS01335]	6666666.269962.peg.1647	960	5	4	5	0	3	0
locus_tag=F7O84_RS01330]	6666666.269962.peg.1648	2055	303	298	238	60	39	85
locus_tag=F7O84_RS01325]	6666666.269962.peg.1649	978	437	349	275	60	62	69
locus_tag=F7O84_RS03245]	6666666.269962.peg.165	1230	1027	1183	910	196	238	305
locus_tag=F7O84_RS01320]	6666666.269962.peg.1650	1554	174	142	138	17	33	62
locus_tag=F7O84_RS01315]	6666666.269962.peg.1651	1101	2	1	4	4	0	0
locus_tag=F7O84_RS01310]	6666666.269962.peg.1652	384	124	166	125	26	6	26
locus_tag=F7O84_RS01300]	6666666.269962.peg.1653	618	141	123	91	112	101	136
locus_tag=F7O84_RS01295]	6666666.269962.peg.1654	744	399	364	364	84	170	137
locus_tag=F7O84_RS01290]	6666666.269962.peg.1655	447	175	121	116	59	74	77
locus_tag=F7O84_RS01285]	6666666.269962.peg.1656	1398	670	631	555	137	133	218
locus_tag=F7O84_RS01280]	6666666.269962.peg.1657	669	376	348	333	61	84	97
locus_tag=F7O84_RS01275]	6666666.269962.peg.1658	1161	831	1008	1028	220	229	339
locus_tag=F7O84_RS01270]	6666666.269962.peg.1659	567	388	318	320	72	115	133
locus_tag=F7O84_RS03250]	6666666.269962.peg.166	669	318	225	189	128	81	156
locus_tag=F7O84_RS01255]	6666666.269962.peg.1660	180	731	644	517	178	250	276
locus_tag=F7O84_RS01250]	6666666.269962.peg.1661	675	836	704	561	301	348	472
locus_tag=F7O84_RS01245]	6666666.269962.peg.1662	1716	176	191	171	32	35	56
locus_tag=F7O84_RS01240]	6666666.269962.peg.1663	705	119	96	85	39	29	57
locus_tag=F7O84_RS03745]	6666666.269962.peg.1664	123	0	2	0	0	0	2
locus_tag=F7O84_RS01235]	6666666.269962.peg.1665	759	5	5	5	4	1	3
locus_tag=F7O84_RS01230]	6666666.269962.peg.1666	489	4	5	5	1	2	7
locus_tag=F7O84_RS06340]	6666666.269962.peg.1667	132	0	0	1	0	0	0
locus_tag=F7O84_RS01225]	6666666.269962.peg.1668	195	1	0	0	0	0	0
locus_tag=F7O84_RS01220]	6666666.269962.peg.1669	330	0	2	0	1	2	1
locus_tag=F7O84_RS03260]	6666666.269962.peg.167	1857	9209	8017	7197	3559	4167	6102
locus_tag=F7O84_RS01215]	6666666.269962.peg.1670	831	2	2	2	2	0	2
locus_tag=F7O84_RS01210]	6666666.269962.peg.1671	378	1	2	4	1	3	3
locus_tag=F7O84_RS01205]	6666666.269962.peg.1672	3750	6125	5562	4619	955	1447	1827
locus_tag=F7O84_RS01200]	6666666.269962.peg.1673	720	181	232	179	69	30	78
locus_tag=F7O84_RS01195]	6666666.269962.peg.1674	936	837	792	606	112	173	206
locus_tag=F7O84_RS01190]	6666666.269962.peg.1675	939	733	658	510	99	176	195
locus_tag=F7O84_RS01185]	6666666.269962.peg.1676	795	3588	3310	2638	986	1544	1778
locus_tag=F7O84_RS01180]	6666666.269962.peg.1677	963	3248	3457	3058	884	1208	1580
locus_tag=F7O84_RS01175]	6666666.269962.peg.1678	1032	36202	36759	30430	8259	15123	16326
locus_tag=F7O84_RS01170]	6666666.269962.peg.1679	447	2052	2946	2876	62	166	184
locus_tag=F7O84_RS03265]	6666666.269962.peg.168	774	693	819	706	354	197	553
locus_tag=F7O84_RS01165]	6666666.269962.peg.1680	624	3526	5204	4964	667	584	819
locus_tag=F7O84_RS01160]	6666666.269962.peg.1681	789	1468	1578	1577	818	638	666
locus_tag=F7O84_RS01155]	6666666.269962.peg.1682	1707	4878	5099	4839	2995	2441	3357
locus_tag=F7O84_RS01150]	6666666.269962.peg.1683	1263	11730	11326	9580	3053	3742	4540
locus_tag=F7O84_RS01145]	6666666.269962.peg.1684	738	1871	2444	2133	751	230	617
locus_tag=F7O84_RS01140]	6666666.269962.peg.1685	846	9756	11204	9167	10049	6962	12927
locus_tag=F7O84_RS17385]	6666666.269962.peg.1686	117	11266	7817	6615	22168	18587	21091
locus_tag=F7O84_RS01135]	6666666.269962.peg.1687	594	129	229	171	73	51	137
locus_tag=F7O84_RS01130]	6666666.269962.peg.1688	1638	165	170	149	54	38	66
locus_tag=F7O84_RS01125]	6666666.269962.peg.1689	924	56	68	56	9	2	13
locus_tag=F7O84_RS03270]	6666666.269962.peg.169	1134	134	190	175	14	4	31
locus_tag=F7O84_RS01120]	6666666.269962.peg.1690	876	954	1009	784	179	224	332
locus_tag=F7O84_RS01115]	6666666.269962.peg.1691	2352	831	764	673	149	172	232
locus_tag=F7O84_RS01110]	6666666.269962.peg.1692	231	233	234	189	39	6	43
locus_tag=F7O84_RS01105]	6666666.269962.peg.1693	822	30	38	24	13	13	18
locus_tag=F7O84_RS01100]	6666666.269962.peg.1694	1344	415	417	305	128	154	250
locus_tag=F7O84_RS01095]	6666666.269962.peg.1695	186	33	35	33	19	15	23
locus_tag=F7O84_RS01090]	6666666.269962.peg.1696	885	39	34	32	33	30	26
locus_tag=F7O84_RS01085]	6666666.269962.peg.1697	717	18	12	8	19	10	20
locus_tag=F7O84_RS01080]	6666666.269962.peg.1698	327	5	1	1	4	3	9
locus_tag=F7O84_RS01075]	6666666.269962.peg.1699	186	761	638	496	144	201	197
locus_tag=F7O84_RS14730]	6666666.269962.peg.17	909	1370	1063	735	576	838	971
locus_tag=F7O84_RS03275]	6666666.269962.peg.170	1317	3163	3113	2566	674	1075	1238
locus_tag=F7O84_RS01070]	6666666.269962.peg.1700	1350	773	849	668	236	194	372
locus_tag=F7O84_RS01065]	6666666.269962.peg.1701	603	155	131	109	18	32	35
locus_tag=F7O84_RS01060]	6666666.269962.peg.1702	495	667	642	500	196	302	356
locus_tag=F7O84_RS01055]	6666666.269962.peg.1703	381	228	172	144	62	85	100
locus_tag=F7O84_RS01050]	6666666.269962.peg.1704	3702	902	732	552	257	354	452
locus_tag=F7O84_RS01045]	6666666.269962.peg.1705	3432	944	833	597	268	299	376
locus_tag=F7O84_RS01040]	6666666.269962.peg.1706	1431	2475	2417	1865	470	756	854
locus_tag=F7O84_RS01035]	6666666.269962.peg.1707	1473	942	873	746	220	322	350
locus_tag=F7O84_RS01030]	6666666.269962.peg.1708	294	32	29	23	22	13	28
locus_tag=F7O84_RS01025]	6666666.269962.peg.1709	195	47	47	57	26	22	26
locus_tag=F7O84_RS03285]	6666666.269962.peg.171	1479	1021	805	704	314	419	487
locus_tag=F7O84_RS05620]	6666666.269962.peg.1710	141	0	0	2	0	0	0
locus_tag=F7O84_RS01020]	6666666.269962.peg.1711	1758	401	441	345	90	96	134
locus_tag=F7O84_RS01015]	6666666.269962.peg.1712	885	775	756	568	251	296	482
locus_tag=F7O84_RS01010]	6666666.269962.peg.1713	2178	197	210	146	85	54	141
locus_tag=F7O84_RS01005]	6666666.269962.peg.1714	954	1421	1333	1024	348	332	576
locus_tag=F7O84_RS01000]	6666666.269962.peg.1715	1446	1189	1153	871	351	308	515
locus_tag=F7O84_RS00995]	6666666.269962.peg.1716	558	2754	2303	2823	1229	1761	1752
locus_tag=F7O84_RS00990]	6666666.269962.peg.1717	843	551	508	494	170	254	281
locus_tag=F7O84_RS00985]	6666666.269962.peg.1718	834	75	108	86	26	8	35
locus_tag=F7O84_RS00980]	6666666.269962.peg.1719	1716	630	553	394	146	188	241
locus_tag=F7O84_RS03290]	6666666.269962.peg.172	672	659	563	508	181	239	326
locus_tag=F7O84_RS00975]	6666666.269962.peg.1720	885	357	302	287	112	97	147
locus_tag=F7O84_RS00970]	6666666.269962.peg.1721	690	414	218	176	221	239	277
locus_tag=F7O84_RS00965]	6666666.269962.peg.1722	606	528	630	615	204	257	250
locus_tag=F7O84_RS00960]	6666666.269962.peg.1723	432	58	60	41	10	16	17
locus_tag=F7O84_RS00955]	6666666.269962.peg.1724	1569	1676	1458	1118	412	427	661
locus_tag=F7O84_RS00950]	6666666.269962.peg.1725	1182	6411	5504	4410	1016	1470	1856
locus_tag=F7O84_RS00945]	6666666.269962.peg.1726	897	1518	1142	990	254	348	402
locus_tag=F7O84_RS00940]	6666666.269962.peg.1727	1224	2925	2773	2239	343	583	532
locus_tag=F7O84_RS00935]	6666666.269962.peg.1728	441	379	266	274	77	123	123
locus_tag=F7O84_RS00930]	6666666.269962.peg.1729	1041	5365	4824	4117	505	822	901
locus_tag=F7O84_RS03295]	6666666.269962.peg.173	576	228	201	224	56	79	99
locus_tag=F7O84_RS00925]	6666666.269962.peg.1730	1224	116743	119709	94823	11450	19581	23318
locus_tag=F7O84_RS00920]	6666666.269962.peg.1731	591	6788	6551	4460	1338	1870	2954
locus_tag=F7O84_RS00915]	6666666.269962.peg.1732	978	4672	4888	3967	1026	1224	1807
locus_tag=F7O84_RS00910]	6666666.269962.peg.1733	249	465	635	402	170	110	320
locus_tag=F7O84_RS00905]	6666666.269962.peg.1734	840	4931	5338	4421	763	1008	1444
locus_tag=F7O84_RS00900]	6666666.269962.peg.1735	1299	1026	878	765	275	332	409
locus_tag=F7O84_RS00895]	6666666.269962.peg.1736	132	30	27	21	19	24	44
locus_tag=F7O84_RS00890]	6666666.269962.peg.1737	504	333	320	288	64	53	114
locus_tag=F7O84_RS00885]	6666666.269962.peg.1738	2064	899	972	884	317	190	435
locus_tag=F7O84_RS00880]	6666666.269962.peg.1739	852	20	13	18	8	13	9
locus_tag=F7O84_RS03300]	6666666.269962.peg.174	792	1348	1429	1584	317	459	552
locus_tag=F7O84_RS00875]	6666666.269962.peg.1740	2049	537	409	474	372	333	456
locus_tag=F7O84_RS00870]	6666666.269962.peg.1741	381	356	390	328	344	331	557
locus_tag=F7O84_RS00865]	6666666.269962.peg.1742	1065	442	346	217	169	175	287
locus_tag=F7O84_RS00860]	6666666.269962.peg.1743	1413	796	766	600	268	388	430
locus_tag=F7O84_RS00855]	6666666.269962.peg.1744	618	324	321	205	78	70	128
locus_tag=F7O84_RS00850]	6666666.269962.peg.1745	741	51	72	51	45	23	76
locus_tag=F7O84_RS00845]	6666666.269962.peg.1746	687	31	42	32	13	12	17
locus_tag=F7O84_RS00840]	6666666.269962.peg.1747	1272	1314	1174	967	249	348	409
locus_tag=F7O84_RS00835]	6666666.269962.peg.1748	837	2445	2435	1967	666	1144	1112
locus_tag=F7O84_RS00830]	6666666.269962.peg.1749	1344	460	465	423	110	131	185
locus_tag=F7O84_RS03305]	6666666.269962.peg.175	984	181	208	164	47	43	71
locus_tag=F7O84_RS00825]	6666666.269962.peg.1750	966	217	202	162	68	66	87
locus_tag=F7O84_RS00820]	6666666.269962.peg.1751	1227	2105	2152	1978	471	699	812
locus_tag=F7O84_RS00815]	6666666.269962.peg.1752	1380	340	291	256	76	107	102
locus_tag=F7O84_RS00810]	6666666.269962.peg.1753	1539	705	683	491	126	137	221
locus_tag=F7O84_RS00805]	6666666.269962.peg.1754	186	5	9	5	19	6	16
locus_tag=F7O84_RS00800]	6666666.269962.peg.1755	246	10	13	5	14	16	28
locus_tag=F7O84_RS00795]	6666666.269962.peg.1756	1182	1269	1124	820	553	721	961
locus_tag=F7O84_RS00775]	6666666.269962.peg.1757	1356	884	716	625	202	282	336
locus_tag=F7O84_RS00770]	6666666.269962.peg.1758	414	5785	4453	3225	2093	2381	3842
locus_tag=F7O84_RS00765]	6666666.269962.peg.1759	2475	5622	4907	3633	1481	2004	2476
locus_tag=F7O84_RS03310]	6666666.269962.peg.176	1266	807	693	492	239	374	425
locus_tag=F7O84_RS00760]	6666666.269962.peg.1760	369	388	355	216	121	147	202
locus_tag=F7O84_RS00755]	6666666.269962.peg.1761	594	92	119	104	14	12	22
locus_tag=F7O84_RS00750]	6666666.269962.peg.1762	1434	420	320	278	222	335	427
locus_tag=F7O84_RS00745]	6666666.269962.peg.1763	1902	478	518	439	401	436	640
locus_tag=F7O84_RS00740]	6666666.269962.peg.1764	1500	2654	2322	2168	659	949	1092
locus_tag=F7O84_RS00735]	6666666.269962.peg.1765	1632	10483	9705	7482	5412	6601	9171
locus_tag=F7O84_RS00730]	6666666.269962.peg.1766	258	1066	773	641	645	784	813
locus_tag=F7O84_RS00725]	6666666.269962.peg.1767	1413	973	901	773	595	648	906
locus_tag=F7O84_RS00720]	6666666.269962.peg.1768	819	144	148	92	142	136	214
locus_tag=F7O84_RS00715]	6666666.269962.peg.1769	834	3401	3246	2618	1561	1582	2251
locus_tag=F7O84_RS03315]	6666666.269962.peg.177	1185	74	124	93	26	5	36
locus_tag=F7O84_RS00710]	6666666.269962.peg.1770	7770	964	852	757	298	441	523
locus_tag=F7O84_RS00705]	6666666.269962.peg.1771	474	6616	8190	7924	1458	1835	2175
locus_tag=F7O84_RS00700]	6666666.269962.peg.1772	2607	183	137	109	41	52	72
locus_tag=F7O84_RS00695]	6666666.269962.peg.1773	1368	83	72	55	32	25	44
locus_tag=F7O84_RS00690]	6666666.269962.peg.1774	996	182	210	195	34	26	41
locus_tag=F7O84_RS00685]	6666666.269962.peg.1775	1899	796	766	678	130	189	229
locus_tag=F7O84_RS00680]	6666666.269962.peg.1776	1740	270	233	168	57	74	95
locus_tag=F7O84_RS00675]	6666666.269962.peg.1777	429	92	93	119	41	20	34
locus_tag=F7O84_RS00670]	6666666.269962.peg.1778	1719	2364	2347	1870	2880	3181	4920
locus_tag=F7O84_RS00665]	6666666.269962.peg.1779	933	808	866	679	845	869	1324
locus_tag=F7O84_RS03320]	6666666.269962.peg.178	537	9	26	26	4	1	1
locus_tag=F7O84_RS00660]	6666666.269962.peg.1780	1077	478	399	306	340	343	453
locus_tag=F7O84_RS00655]	6666666.269962.peg.1781	201	8792	7309	5542	10000	6875	13649
locus_tag=F7O84_RS00650]	6666666.269962.peg.1782	795	1801	1804	1810	385	546	576
locus_tag=F7O84_RS00645]	6666666.269962.peg.1783	411	1056	1292	1299	131	244	256
locus_tag=F7O84_RS00640]	6666666.269962.peg.1784	585	43	79	46	10	1	6
locus_tag=F7O84_RS00635]	6666666.269962.peg.1785	1458	451	408	341	108	91	117
locus_tag=F7O84_RS00630]	6666666.269962.peg.1786	864	86	108	94	16	11	21
locus_tag=F7O84_RS00625]	6666666.269962.peg.1787	1026	226	195	139	29	35	62
locus_tag=F7O84_RS00620]	6666666.269962.peg.1788	1959	2325	2452	1950	632	613	1105
locus_tag=F7O84_RS00615]	6666666.269962.peg.1789	1005	314	291	259	69	105	133
locus_tag=F7O84_RS03325]	6666666.269962.peg.179	1155	439	318	491	224	275	250
locus_tag=F7O84_RS00610]	6666666.269962.peg.1790	1272	2008	1618	1348	581	849	908
locus_tag=F7O84_RS00605]	6666666.269962.peg.1791	627	220	140	121	143	158	194
locus_tag=F7O84_RS00600]	6666666.269962.peg.1792	1026	872	683	688	341	399	418
locus_tag=F7O84_RS00595]	6666666.269962.peg.1793	516	455	349	352	110	176	145
locus_tag=F7O84_RS00590]	6666666.269962.peg.1794	1128	1429	1183	977	317	396	512
locus_tag=F7O84_RS00585]	6666666.269962.peg.1795	2082	4940	5079	3868	1085	833	1564
locus_tag=F7O84_RS00580]	6666666.269962.peg.1796	204	151	105	92	30	33	39
locus_tag=F7O84_RS00575]	6666666.269962.peg.1797	465	90	113	75	52	30	68
locus_tag=F7O84_RS02305]	6666666.269962.peg.1798	153	434	257	239	155	209	217
locus_tag=F7O84_RS00570]	6666666.269962.peg.1799	675	2619	1806	1462	791	1178	1286
locus_tag=F7O84_RS14725]	6666666.269962.peg.18	738	772	702	556	291	321	457
locus_tag=F7O84_RS03330]	6666666.269962.peg.180	939	493	406	330	253	306	392
locus_tag=F7O84_RS00565]	6666666.269962.peg.1800	903	3675	2874	2283	770	1237	1274
locus_tag=F7O84_RS00560]	6666666.269962.peg.1801	777	2212	1722	1408	499	737	889
locus_tag=F7O84_RS00555]	6666666.269962.peg.1802	924	2690	2400	2268	709	970	1168
locus_tag=F7O84_RS00550]	6666666.269962.peg.1803	1287	7974	7427	6052	1254	2050	2248
locus_tag=F7O84_RS00545]	6666666.269962.peg.1804	2469	658	630	588	155	162	233
locus_tag=F7O84_RS00540]	6666666.269962.peg.1805	1680	554	525	445	79	99	164
locus_tag=F7O84_RS00535]	6666666.269962.peg.1806	2418	7520	6707	5170	1832	2231	3028
locus_tag=F7O84_RS00530]	6666666.269962.peg.1807	1251	5073	4706	3720	892	1549	1629
locus_tag=F7O84_RS00525]	6666666.269962.peg.1808	1050	1339	1391	1162	486	450	744
locus_tag=F7O84_RS00520]	6666666.269962.peg.1809	1491	662	623	496	444	431	703
locus_tag=F7O84_RS03335]	6666666.269962.peg.181	411	121	136	118	11	15	16
locus_tag=F7O84_RS00515]	6666666.269962.peg.1810	993	374	378	340	171	269	231
locus_tag=F7O84_RS00510]	6666666.269962.peg.1811	1164	195	150	116	112	113	136
locus_tag=F7O84_RS00505]	6666666.269962.peg.1812	870	620	585	347	222	257	438
locus_tag=F7O84_RS00500]	6666666.269962.peg.1813	756	1419	1351	867	504	673	935
locus_tag=F7O84_RS00495]	6666666.269962.peg.1814	891	1135	1154	732	362	499	657
locus_tag=F7O84_RS09865]	6666666.269962.peg.1815	162	43	28	25	29	27	52
locus_tag=F7O84_RS00490]	6666666.269962.peg.1816	1152	3731	3509	2514	700	1072	1506
locus_tag=F7O84_RS00485]	6666666.269962.peg.1817	930	919	982	730	298	175	372
locus_tag=F7O84_RS00480]	6666666.269962.peg.1818	516	1093	1126	879	298	242	519
locus_tag=F7O84_RS00475]	6666666.269962.peg.1819	1326	841	895	736	271	385	423
locus_tag=F7O84_RS03340]	6666666.269962.peg.182	909	1288	1301	1046	252	294	456
locus_tag=F7O84_RS00470]	6666666.269962.peg.1820	690	56	63	46	27	24	28
locus_tag=F7O84_RS00465]	6666666.269962.peg.1821	174	55	51	38	13	8	23
locus_tag=F7O84_RS00460]	6666666.269962.peg.1822	2586	3505	3142	2619	475	763	936
locus_tag=F7O84_RS00455]	6666666.269962.peg.1823	1872	742	651	475	165	271	317
locus_tag=F7O84_RS00450]	6666666.269962.peg.1824	222	293	273	195	63	58	121
locus_tag=F7O84_RS00445]	6666666.269962.peg.1825	363	67	81	67	25	13	17
locus_tag=F7O84_RS00440]	6666666.269962.peg.1826	1248	27665	26637	18868	6610	7728	11578
locus_tag=F7O84_RS00435]	6666666.269962.peg.1827	1161	18250	16115	12286	4673	6214	8909
locus_tag=F7O84_RS00430]	6666666.269962.peg.1828	984	1308	1260	924	258	271	394
locus_tag=F7O84_RS00425]	6666666.269962.peg.1829	921	696	752	569	217	128	330
locus_tag=F7O84_RS03345]	6666666.269962.peg.183	1308	1364	1018	907	529	635	827
locus_tag=F7O84_RS00420]	6666666.269962.peg.1830	594	659	680	467	166	177	282
locus_tag=F7O84_RS00415]	6666666.269962.peg.1831	2337	3375	3414	2926	661	901	1016
locus_tag=F7O84_RS00410]	6666666.269962.peg.1832	1299	10487	7985	6369	2541	3469	4085
locus_tag=F7O84_RS00405]	6666666.269962.peg.1833	582	1781	1544	1162	520	497	647
locus_tag=F7O84_RS00400]	6666666.269962.peg.1834	1290	23547	21234	14448	8796	10219	16032
locus_tag=F7O84_RS00395]	6666666.269962.peg.1835	669	407	421	356	194	256	348
locus_tag=F7O84_RS00390]	6666666.269962.peg.1836	204	42	59	25	85	74	99
locus_tag=F7O84_RS00385]	6666666.269962.peg.1837	453	43	33	47	73	48	81
locus_tag=F7O84_RS00380]	6666666.269962.peg.1838	555	120	117	121	68	67	89
locus_tag=F7O84_RS00375]	6666666.269962.peg.1839	582	177	179	131	44	18	59
locus_tag=F7O84_RS03350]	6666666.269962.peg.184	864	3630	2838	2383	861	1278	1231
locus_tag=F7O84_RS00370]	6666666.269962.peg.1840	1776	1746	1654	1311	436	705	867
locus_tag=F7O84_RS00365]	6666666.269962.peg.1841	738	68	46	46	14	19	23
locus_tag=F7O84_RS00360]	6666666.269962.peg.1842	1281	1694	1572	1438	174	279	333
locus_tag=F7O84_RS00355]	6666666.269962.peg.1843	1410	42	34	18	7	11	6
locus_tag=F7O84_RS00350]	6666666.269962.peg.1844	831	85	96	63	11	9	23
locus_tag=F7O84_RS00345]	6666666.269962.peg.1845	999	182	193	148	50	34	80
locus_tag=F7O84_RS00340]	6666666.269962.peg.1846	456	185	259	197	23	17	54
locus_tag=F7O84_RS00335]	6666666.269962.peg.1847	1293	61062	46990	29605	5070	9024	10597
locus_tag=F7O84_RS00330]	6666666.269962.peg.1848	468	906	912	768	119	112	189
locus_tag=F7O84_RS00325]	6666666.269962.peg.1849	579	65679	72557	56533	14046	16397	25999
locus_tag=F7O84_RS03355]	6666666.269962.peg.185	771	1355	1369	889	629	589	1018
locus_tag=F7O84_RS00320]	6666666.269962.peg.1850	753	4604	3762	2592	2471	3302	4660
locus_tag=F7O84_RS00315]	6666666.269962.peg.1851	909	3902	3392	2759	829	1378	1407
locus_tag=F7O84_RS00310]	6666666.269962.peg.1852	669	723	665	488	227	315	419
locus_tag=F7O84_RS00305]	6666666.269962.peg.1853	1284	659	811	651	388	166	521
locus_tag=F7O84_RS07660]	6666666.269962.peg.1854	174	45170	32670	22012	12410	25148	22808
locus_tag=F7O84_RS13570]	6666666.269962.peg.1855	147	3760	4225	4240	2777	1622	2827
locus_tag=F7O84_RS00295]	6666666.269962.peg.1856	348	88	87	60	15	6	22
locus_tag=F7O84_RS00290]	6666666.269962.peg.1857	894	162	210	120	88	59	121
locus_tag=F7O84_RS00810]	6666666.269962.peg.1858	153	0	0	1	0	0	0
locus_tag=F7O84_RS00285]	6666666.269962.peg.1859	3006	525	460	314	171	167	277
locus_tag=F7O84_RS03360]	6666666.269962.peg.186	366	82	77	87	64	40	53
locus_tag=F7O84_RS00280]	6666666.269962.peg.1860	789	1248	1319	1101	262	336	392
locus_tag=F7O84_RS00275]	6666666.269962.peg.1861	1014	550	513	418	167	149	221
locus_tag=F7O84_RS00235]	6666666.269962.peg.1862	960	3460	3164	2857	888	1555	1601
locus_tag=F7O84_RS00230]	6666666.269962.peg.1863	489	143	131	117	96	81	118
locus_tag=F7O84_RS00225]	6666666.269962.peg.1864	600	442	399	328	255	293	320
locus_tag=F7O84_RS00220]	6666666.269962.peg.1865	1077	1796	1867	1467	662	667	967
locus_tag=F7O84_RS00215]	6666666.269962.peg.1866	1713	2500	2155	1841	749	869	1175
locus_tag=F7O84_RS00210]	6666666.269962.peg.1867	1149	2931	2407	1762	1193	1315	1979
locus_tag=F7O84_RS00205]	6666666.269962.peg.1868	543	490	508	421	204	172	281
locus_tag=F7O84_RS00200]	6666666.269962.peg.1869	303	4	4	5	0	1	1
locus_tag=F7O84_RS03365]	6666666.269962.peg.187	1611	198	217	170	116	91	165
locus_tag=F7O84_RS06515]	6666666.269962.peg.1870	240	0	1	2	5	2	6
locus_tag=F7O84_RS00190]	6666666.269962.peg.1871	552	17569	19018	14828	2628	2703	4359
locus_tag=F7O84_RS00185]	6666666.269962.peg.1872	486	673	745	525	250	214	392
locus_tag=F7O84_RS00180]	6666666.269962.peg.1873	528	22293	21235	15586	2997	2732	4995
locus_tag=F7O84_RS00175]	6666666.269962.peg.1874	1161	76023	88572	75375	11211	11616	18829
locus_tag=F7O84_RS03205]	6666666.269962.peg.1875	717	97	99	100	32	18	34
locus_tag=F7O84_RS03200]	6666666.269962.peg.1876	3546	112183	92914	68346	25692	38564	49042
locus_tag=F7O84_RS03195]	6666666.269962.peg.1877	1482	2228	2360	2145	2836	2557	3752
locus_tag=F7O84_RS03190]	6666666.269962.peg.1878	3750	4939	5732	4282	1090	1288	1844
locus_tag=F7O84_RS03185]	6666666.269962.peg.1879	738	102	91	76	34	38	49
locus_tag=F7O84_RS03370]	6666666.269962.peg.188	864	273	224	193	54	74	96
locus_tag=F7O84_RS03180]	6666666.269962.peg.1880	219	269	214	272	104	152	162
locus_tag=F7O84_RS00415]	6666666.269962.peg.1881	153	1	2	1	0	0	1
locus_tag=F7O84_RS03175]	6666666.269962.peg.1882	462	18	17	18	10	8	14
locus_tag=F7O84_RS03170]	6666666.269962.peg.1883	270	55	49	40	8	16	32
locus_tag=F7O84_RS03165]	6666666.269962.peg.1884	789	430	319	243	105	168	214
locus_tag=F7O84_RS03160]	6666666.269962.peg.1885	2526	410	392	359	141	202	226
locus_tag=F7O84_RS03155]	6666666.269962.peg.1886	834	593	749	648	230	158	349
locus_tag=F7O84_RS03150]	6666666.269962.peg.1887	1557	1792	1799	1427	435	628	786
locus_tag=F7O84_RS03145]	6666666.269962.peg.1888	1779	2452	2276	1855	610	950	1030
locus_tag=F7O84_RS03140]	6666666.269962.peg.1889	504	75	88	57	46	46	29
locus_tag=F7O84_RS03375]	6666666.269962.peg.189	1647	340	347	229	102	114	155
locus_tag=F7O84_RS03135]	6666666.269962.peg.1890	1176	26508	26169	20479	6132	9159	11677
locus_tag=F7O84_RS03130]	6666666.269962.peg.1891	2406	6532	6057	4773	1273	1916	2443
locus_tag=F7O84_RS03125]	6666666.269962.peg.1892	219	101	108	102	56	42	86
locus_tag=F7O84_RS03120]	6666666.269962.peg.1893	1020	252	233	198	120	151	158
locus_tag=F7O84_RS03115]	6666666.269962.peg.1894	1188	87	70	47	19	26	35
locus_tag=F7O84_RS03110]	6666666.269962.peg.1895	930	1743	1508	963	373	603	753
locus_tag=F7O84_RS03105]	6666666.269962.peg.1896	576	82	48	37	11	14	22
locus_tag=F7O84_RS03100]	6666666.269962.peg.1897	552	174	241	154	25	33	50
locus_tag=F7O84_RS03095]	6666666.269962.peg.1898	1173	1229	1135	919	348	401	566
locus_tag=F7O84_RS03090]	6666666.269962.peg.1899	720	1227	1135	811	448	466	680
locus_tag=F7O84_RS14720]	6666666.269962.peg.19	846	560	558	475	199	214	275
locus_tag=F7O84_RS03380]	6666666.269962.peg.190	1293	262	224	199	86	107	167
locus_tag=F7O84_RS03085]	6666666.269962.peg.1900	1476	477	468	423	238	208	352
locus_tag=F7O84_RS03080]	6666666.269962.peg.1901	684	291	204	167	110	132	174
locus_tag=F7O84_RS03075]	6666666.269962.peg.1902	540	51	73	60	51	12	27
locus_tag=F7O84_RS03070]	6666666.269962.peg.1903	180	0	1	0	0	0	0
locus_tag=F7O84_RS03065]	6666666.269962.peg.1904	771	2	1	8	0	1	2
locus_tag=F7O84_RS05840]	6666666.269962.peg.1905	129	11020	7186	6851	1368	2472	1943
locus_tag=F7O84_RS03055]	6666666.269962.peg.1906	885	261	305	260	55	71	98
locus_tag=F7O84_RS03050]	6666666.269962.peg.1907	813	97	98	78	21	32	48
locus_tag=F7O84_RS03045]	6666666.269962.peg.1908	1245	138	105	83	29	43	38
locus_tag=F7O84_RS03040]	6666666.269962.peg.1909	867	78	76	66	16	15	20
locus_tag=F7O84_RS03385]	6666666.269962.peg.191	2307	1246	1152	888	279	449	513
locus_tag=F7O84_RS03035]	6666666.269962.peg.1910	234	352	356	279	103	129	156
locus_tag=F7O84_RS03030]	6666666.269962.peg.1911	468	101	127	91	63	52	112
locus_tag=F7O84_RS03025]	6666666.269962.peg.1912	2151	633	578	537	217	291	343
locus_tag=F7O84_RS03020]	6666666.269962.peg.1913	240	1693	1718	1778	233	469	402
locus_tag=F7O84_RS03015]	6666666.269962.peg.1914	876	272	314	264	68	72	109
locus_tag=F7O84_RS03010]	6666666.269962.peg.1915	1542	5329	4864	3870	1220	1846	2248
locus_tag=F7O84_RS03005]	6666666.269962.peg.1916	1092	4681	4212	3382	977	1591	2002
locus_tag=F7O84_RS03000]	6666666.269962.peg.1917	528	612	634	569	93	151	212
locus_tag=F7O84_RS02995]	6666666.269962.peg.1918	1854	753	740	618	252	249	441
locus_tag=F7O84_RS02990]	6666666.269962.peg.1919	1797	958	721	493	162	277	312
locus_tag=F7O84_RS03390]	6666666.269962.peg.192	1104	1138	1148	994	304	457	539
locus_tag=F7O84_RS02985]	6666666.269962.peg.1920	621	104	92	64	26	40	67
locus_tag=F7O84_RS02980]	6666666.269962.peg.1921	2214	267	258	199	84	87	145
locus_tag=F7O84_RS02975]	6666666.269962.peg.1922	831	55	49	43	13	24	22
locus_tag=F7O84_RS02970]	6666666.269962.peg.1923	897	44	29	19	7	25	14
locus_tag=F7O84_RS02965]	6666666.269962.peg.1924	1293	71	44	51	37	58	61
locus_tag=F7O84_RS02960]	6666666.269962.peg.1925	861	128	132	87	42	63	82
locus_tag=F7O84_RS02955]	6666666.269962.peg.1926	372	689	551	395	327	378	677
locus_tag=F7O84_RS02950]	6666666.269962.peg.1927	459	773	704	575	209	267	377
locus_tag=F7O84_RS02945]	6666666.269962.peg.1928	165	60	65	48	29	9	38
locus_tag=F7O84_RS02940]	6666666.269962.peg.1929	639	263	229	161	93	92	135
locus_tag=F7O84_RS03395]	6666666.269962.peg.193	1833	402	423	305	168	148	275
locus_tag=F7O84_RS02935]	6666666.269962.peg.1930	579	139	188	145	82	61	133
locus_tag=F7O84_RS02930]	6666666.269962.peg.1931	402	87	77	80	25	28	26
locus_tag=F7O84_RS02925]	6666666.269962.peg.1932	1869	395	351	252	133	153	181
locus_tag=F7O84_RS02925]	6666666.269962.peg.1933	1161	480	365	307	125	142	204
locus_tag=F7O84_RS02920]	6666666.269962.peg.1934	465	12	11	9	3	8	12
locus_tag=F7O84_RS02915]	6666666.269962.peg.1935	456	4	4	9	3	2	8
locus_tag=F7O84_RS02910]	6666666.269962.peg.1936	981	8	8	9	4	4	12
locus_tag=F7O84_RS02905]	6666666.269962.peg.1937	402	54	38	30	16	19	27
locus_tag=F7O84_RS02900]	6666666.269962.peg.1938	750	5638	4985	3851	2116	2676	3747
locus_tag=F7O84_RS02895]	6666666.269962.peg.1939	1191	14963	13610	11002	3738	5823	6612
locus_tag=F7O84_RS03400]	6666666.269962.peg.194	1632	204	166	103	185	166	198
locus_tag=F7O84_RS02890]	6666666.269962.peg.1940	1014	42244	40716	28218	11120	13523	21403
locus_tag=F7O84_RS02885]	6666666.269962.peg.1941	1665	765	736	578	390	403	623
locus_tag=F7O84_RS02880]	6666666.269962.peg.1942	1089	608	596	396	161	166	254
locus_tag=F7O84_RS02875]	6666666.269962.peg.1943	1179	7	4	7	0	3	1
locus_tag=F7O84_RS02870]	6666666.269962.peg.1944	1398	6	6	9	2	7	6
locus_tag=F7O84_RS02865]	6666666.269962.peg.1945	1032	5932	5632	3909	1030	1235	1890
locus_tag=F7O84_RS02860]	6666666.269962.peg.1946	885	1379	1801	1262	827	598	1420
locus_tag=F7O84_RS02855]	6666666.269962.peg.1947	609	121	158	157	15	14	25
locus_tag=F7O84_RS02850]	6666666.269962.peg.1948	537	301	267	201	81	77	116
locus_tag=F7O84_RS02845]	6666666.269962.peg.1949	798	563	580	492	115	150	160
locus_tag=F7O84_RS03405]	6666666.269962.peg.195	612	8	9	7	2	1	2
locus_tag=F7O84_RS02840]	6666666.269962.peg.1950	1554	28218	23028	18130	9096	13647	15294
locus_tag=F7O84_RS02835]	6666666.269962.peg.1951	633	48	33	24	9	7	19
locus_tag=F7O84_RS02830]	6666666.269962.peg.1952	1038	1492	1075	900	488	685	664
locus_tag=F7O84_RS02825]	6666666.269962.peg.1953	177	2853	3042	2278	2564	1244	3542
locus_tag=F7O84_RS02820]	6666666.269962.peg.1954	2880	4160	3835	2726	1004	1319	1746
locus_tag=F7O84_RS02815]	6666666.269962.peg.1955	5367	93	145	73	25	20	29
locus_tag=F7O84_RS02805]	6666666.269962.peg.1956	1800	4233	3528	2859	607	963	996
locus_tag=F7O84_RS02800]	6666666.269962.peg.1957	1260	1416	1093	903	219	317	356
locus_tag=F7O84_RS02795]	6666666.269962.peg.1958	582	114	160	106	24	13	34
locus_tag=F7O84_RS02790]	6666666.269962.peg.1959	1473	1690	1775	1315	210	221	367
locus_tag=F7O84_RS03410]	6666666.269962.peg.196	1746	65	57	27	17	23	25
locus_tag=F7O84_RS02785]	6666666.269962.peg.1960	633	895	744	509	137	167	207
locus_tag=F7O84_RS02780]	6666666.269962.peg.1961	2304	3178	2837	2291	589	748	878
locus_tag=F7O84_RS02775]	6666666.269962.peg.1962	525	982	1033	800	625	412	1003
locus_tag=F7O84_RS02770]	6666666.269962.peg.1963	435	724	573	539	149	230	241
locus_tag=F7O84_RS02765]	6666666.269962.peg.1964	1185	492	434	408	167	187	253
locus_tag=F7O84_RS02760]	6666666.269962.peg.1965	1290	3698	3445	2534	618	846	1159
locus_tag=F7O84_RS18720]	6666666.269962.peg.1966	156	17	14	22	8	1	10
locus_tag=F7O84_RS02755]	6666666.269962.peg.1967	438	1019	1013	817	148	289	353
locus_tag=F7O84_RS02750]	6666666.269962.peg.1968	645	173	235	150	32	33	62
locus_tag=F7O84_RS02745]	6666666.269962.peg.1969	2385	3167	2632	1786	500	773	945
locus_tag=F7O84_RS03415]	6666666.269962.peg.197	1734	49	44	35	6	12	19
locus_tag=F7O84_RS02740]	6666666.269962.peg.1970	867	3252	3161	2442	827	1358	1563
locus_tag=F7O84_RS02735]	6666666.269962.peg.1971	264	17	15	11	3	9	14
locus_tag=F7O84_RS02730]	6666666.269962.peg.1972	273	14	22	25	6	6	6
locus_tag=F7O84_RS02725]	6666666.269962.peg.1973	531	26	28	22	13	9	16
locus_tag=F7O84_RS02720]	6666666.269962.peg.1974	459	34	46	35	15	3	11
locus_tag=F7O84_RS02715]	6666666.269962.peg.1975	303	61	70	67	27	14	34
locus_tag=F7O84_RS02710]	6666666.269962.peg.1976	384	10	20	27	1	1	3
locus_tag=F7O84_RS02705]	6666666.269962.peg.1977	783	67	86	50	16	6	13
locus_tag=F7O84_RS02700]	6666666.269962.peg.1978	1203	6962	6645	4559	1461	1796	2654
locus_tag=F7O84_RS02695]	6666666.269962.peg.1979	801	1606	1490	1290	291	337	486
locus_tag=F7O84_RS03420]	6666666.269962.peg.198	2178	3806	3571	2517	1174	1810	2186
locus_tag=F7O84_RS02690]	6666666.269962.peg.1980	2088	20715	18637	13435	3311	5385	6809
locus_tag=F7O84_RS02685]	6666666.269962.peg.1981	267	16105	12836	9484	4733	5250	8331
locus_tag=F7O84_RS02680]	6666666.269962.peg.1982	1251	5451	5022	4020	831	1400	1517
locus_tag=F7O84_RS02675]	6666666.269962.peg.1983	549	624	565	441	149	201	288
locus_tag=F7O84_RS02670]	6666666.269962.peg.1984	1338	2538	2476	1744	550	741	998
locus_tag=F7O84_RS02665]	6666666.269962.peg.1985	1050	7	9	10	3	3	3
locus_tag=F7O84_RS02660]	6666666.269962.peg.1986	933	10	9	11	2	1	2
locus_tag=F7O84_RS02655]	6666666.269962.peg.1987	462	16	27	32	40	12	54
locus_tag=F7O84_RS02650]	6666666.269962.peg.1988	594	4	5	6	10	3	3
locus_tag=F7O84_RS02645]	6666666.269962.peg.1989	1029	14	15	13	9	10	9
locus_tag=F7O84_RS03425]	6666666.269962.peg.199	642	320	289	241	113	96	162
locus_tag=F7O84_RS02640]	6666666.269962.peg.1990	960	9	12	9	1	6	6
locus_tag=F7O84_RS02635]	6666666.269962.peg.1991	1047	10	10	9	5	2	2
locus_tag=F7O84_RS02630]	6666666.269962.peg.1992	1221	3	3	4	0	1	0
locus_tag=F7O84_RS13230]	6666666.269962.peg.1993	213	65	57	61	23	25	36
locus_tag=F7O84_RS13235]	6666666.269962.peg.1994	1242	484	460	386	95	181	176
locus_tag=F7O84_RS13240]	6666666.269962.peg.1995	456	27	31	16	4	4	1
locus_tag=F7O84_RS13245]	6666666.269962.peg.1996	2595	690	819	695	358	179	409
locus_tag=F7O84_RS13250]	6666666.269962.peg.1997	3207	261	295	311	77	31	64
locus_tag=F7O84_RS13255]	6666666.269962.peg.1998	1032	417	333	312	86	131	146
locus_tag=F7O84_RS07035]	6666666.269962.peg.1999	120	14	8	13	0	5	2
locus_tag=F7O84_RS12570]	6666666.269962.peg.2	918	20	17	18	9	7	9
locus_tag=F7O84_RS14715]	6666666.269962.peg.20	1719	97	73	55	28	37	41
locus_tag=F7O84_RS03430]	6666666.269962.peg.200	2436	405	404	316	65	149	151
locus_tag=F7O84_RS13260]	6666666.269962.peg.2000	381	2	3	0	2	0	4
locus_tag=F7O84_RS13265]	6666666.269962.peg.2001	969	9	11	13	11	6	5
locus_tag=F7O84_RS13270]	6666666.269962.peg.2002	375	2	5	0	3	0	1
locus_tag=F7O84_RS13275]	6666666.269962.peg.2003	1077	17	11	12	2	6	8
locus_tag=F7O84_RS13280]	6666666.269962.peg.2004	195	4	1	0	0	1	3
locus_tag=F7O84_RS13285]	6666666.269962.peg.2005	540	119	98	78	29	41	44
locus_tag=F7O84_RS13290]	6666666.269962.peg.2006	900	44	69	59	3	3	4
locus_tag=F7O84_RS13295]	6666666.269962.peg.2007	921	37	34	41	4	1	2
locus_tag=F7O84_RS13300]	6666666.269962.peg.2008	1542	16749	12766	11691	2329	4068	4107
locus_tag=F7O84_RS13305]	6666666.269962.peg.2009	1344	958	905	722	355	627	583
locus_tag=F7O84_RS03435]	6666666.269962.peg.201	1020	124	96	83	42	56	54
locus_tag=F7O84_RS13310]	6666666.269962.peg.2010	1188	636	596	609	280	350	358
locus_tag=F7O84_RS13315]	6666666.269962.peg.2011	267	3	1	5	1	3	7
locus_tag=F7O84_RS13320]	6666666.269962.peg.2012	1098	4217	4175	2873	965	1326	1686
locus_tag=F7O84_RS13325]	6666666.269962.peg.2013	1119	404	397	263	76	109	129
locus_tag=F7O84_RS13330]	6666666.269962.peg.2014	1158	201	206	148	47	52	67
locus_tag=F7O84_RS13335]	6666666.269962.peg.2015	1473	199	134	123	70	64	112
locus_tag=F7O84_RS13340]	6666666.269962.peg.2016	174	7	2	6	1	1	1
locus_tag=F7O84_RS13340]	6666666.269962.peg.2017	117	0	0	0	0	0	0
locus_tag=F7O84_RS13345]	6666666.269962.peg.2018	1470	36	31	26	21	23	20
locus_tag=F7O84_RS13350]	6666666.269962.peg.2019	990	15	18	13	8	10	16
locus_tag=F7O84_RS03440]	6666666.269962.peg.202	1413	798	608	586	257	375	424
locus_tag=F7O84_RS13355]	6666666.269962.peg.2020	1644	103	70	73	22	20	40
locus_tag=F7O84_RS13360]	6666666.269962.peg.2021	897	46	54	32	6	10	12
locus_tag=F7O84_RS13365]	6666666.269962.peg.2022	936	28	33	13	3	3	4
locus_tag=F7O84_RS13370]	6666666.269962.peg.2023	1056	904	985	658	216	276	456
locus_tag=F7O84_RS13375]	6666666.269962.peg.2024	642	408	368	272	93	133	165
locus_tag=F7O84_RS13380]	6666666.269962.peg.2025	1560	22462	20117	16865	6602	10582	11804
locus_tag=F7O84_RS13385]	6666666.269962.peg.2026	780	747	684	542	123	175	246
locus_tag=F7O84_RS13390]	6666666.269962.peg.2027	654	367	257	201	65	83	96
locus_tag=F7O84_RS13395]	6666666.269962.peg.2028	1386	443	459	360	85	121	156
locus_tag=F7O84_RS13400]	6666666.269962.peg.2029	975	4721	4233	4824	1274	1913	1875
locus_tag=F7O84_RS00750]	6666666.269962.peg.203	123	3	5	4	0	0	0
locus_tag=F7O84_RS13405]	6666666.269962.peg.2030	3483	7492	6389	5079	1380	2345	2395
locus_tag=F7O84_RS13410]	6666666.269962.peg.2031	1380	1295	1154	779	312	496	636
locus_tag=F7O84_RS13415]	6666666.269962.peg.2032	1074	1536	1545	1035	252	308	486
locus_tag=F7O84_RS13420]	6666666.269962.peg.2033	981	1349	1235	860	323	380	668
locus_tag=F7O84_RS13425]	6666666.269962.peg.2034	1188	6704	5740	3827	1122	1480	2061
locus_tag=F7O84_RS13430]	6666666.269962.peg.2035	462	1008	811	659	239	319	376
locus_tag=F7O84_RS13435]	6666666.269962.peg.2036	1134	276	331	261	65	45	66
locus_tag=F7O84_RS13440]	6666666.269962.peg.2037	1818	5218	5482	4317	1272	1908	2554
locus_tag=F7O84_RS13445]	6666666.269962.peg.2038	2157	3517	3242	2551	509	835	806
locus_tag=F7O84_RS13450]	6666666.269962.peg.2039	510	472	405	304	97	133	209
locus_tag=F7O84_RS03445]	6666666.269962.peg.204	1005	168	210	163	68	46	94
locus_tag=F7O84_RS13455]	6666666.269962.peg.2040	1167	10857	10414	8018	1257	2056	2587
locus_tag=F7O84_RS13460]	6666666.269962.peg.2041	486	2104	1689	1214	504	618	878
locus_tag=F7O84_RS13465]	6666666.269962.peg.2042	990	6629	5018	4684	1916	2191	2813
locus_tag=F7O84_RS13470]	6666666.269962.peg.2043	1521	5034	4514	3408	1051	1411	1824
locus_tag=F7O84_RS13475]	6666666.269962.peg.2044	603	260	329	283	84	27	92
locus_tag=F7O84_RS13480]	6666666.269962.peg.2045	711	328	335	271	68	70	102
locus_tag=F7O84_RS13485]	6666666.269962.peg.2046	660	124	129	85	75	63	79
locus_tag=F7O84_RS13490]	6666666.269962.peg.2047	1737	350	379	246	98	83	169
locus_tag=F7O84_RS13495]	6666666.269962.peg.2048	918	2570	2597	2253	521	702	1092
locus_tag=F7O84_RS13500]	6666666.269962.peg.2049	927	36	48	30	7	10	13
locus_tag=F7O84_RS03450]	6666666.269962.peg.205	909	249	255	165	67	74	122
locus_tag=F7O84_RS13505]	6666666.269962.peg.2050	876	18	18	8	2	2	3
locus_tag=F7O84_RS13510]	6666666.269962.peg.2051	1401	453	404	300	116	155	208
locus_tag=F7O84_RS13515]	6666666.269962.peg.2052	438	94	73	62	32	26	56
locus_tag=F7O84_RS13520]	6666666.269962.peg.2053	198	86	76	33	21	10	28
locus_tag=F7O84_RS13525]	6666666.269962.peg.2054	1818	121	118	68	13	29	36
locus_tag=F7O84_RS13530]	6666666.269962.peg.2055	1557	194	182	134	26	35	59
locus_tag=F7O84_RS13535]	6666666.269962.peg.2056	1482	2396	2141	1671	289	456	509
locus_tag=F7O84_RS13540]	6666666.269962.peg.2057	1791	1218	1147	1065	138	215	249
locus_tag=F7O84_RS13545]	6666666.269962.peg.2058	915	8	12	3	0	2	2
locus_tag=F7O84_RS13550]	6666666.269962.peg.2059	948	3	4	1	0	1	3
locus_tag=F7O84_RS03455]	6666666.269962.peg.206	1005	72	56	31	40	54	45
locus_tag=F7O84_RS13555]	6666666.269962.peg.2060	663	3	4	2	2	1	1
locus_tag=F7O84_RS13560]	6666666.269962.peg.2061	660	36	36	49	43	31	69
locus_tag=F7O84_RS13565]	6666666.269962.peg.2062	477	45	27	29	61	62	53
locus_tag=F7O84_RS13570]	6666666.269962.peg.2063	1203	67	76	69	86	120	116
locus_tag=F7O84_RS13575]	6666666.269962.peg.2064	648	122	93	67	84	114	122
locus_tag=F7O84_RS13580]	6666666.269962.peg.2065	1104	441	430	334	212	346	410
locus_tag=F7O84_RS13585]	6666666.269962.peg.2066	1137	1199	945	764	277	419	565
locus_tag=F7O84_RS13590]	6666666.269962.peg.2067	1479	352	327	215	116	145	195
locus_tag=F7O84_RS13595]	6666666.269962.peg.2068	426	512	531	480	77	112	134
locus_tag=F7O84_RS13615]	6666666.269962.peg.2069	1341	74	66	73	6	5	12
locus_tag=F7O84_RS03460]	6666666.269962.peg.207	1434	102	105	83	58	64	70
locus_tag=F7O84_RS13620]	6666666.269962.peg.2070	501	17	32	23	1	0	4
locus_tag=F7O84_RS13635]	6666666.269962.peg.2071	2091	1110	1011	882	277	443	507
locus_tag=F7O84_RS13640]	6666666.269962.peg.2072	336	202	275	222	34	12	53
locus_tag=F7O84_RS13645]	6666666.269962.peg.2073	1584	1489	1632	1387	171	238	310
locus_tag=F7O84_RS13650]	6666666.269962.peg.2074	2007	457	430	308	151	139	248
locus_tag=F7O84_RS13655]	6666666.269962.peg.2075	852	107	83	105	22	26	55
locus_tag=F7O84_RS13660]	6666666.269962.peg.2076	918	99	108	108	64	45	81
locus_tag=F7O84_RS13665]	6666666.269962.peg.2077	1383	2098	2132	1825	688	870	1109
locus_tag=F7O84_RS13670]	6666666.269962.peg.2078	1536	192	207	168	117	73	138
locus_tag=F7O84_RS13675]	6666666.269962.peg.2079	1749	235	250	197	78	73	92
locus_tag=F7O84_RS03465]	6666666.269962.peg.208	264	3	3	2	4	3	6
locus_tag=F7O84_RS13680]	6666666.269962.peg.2080	2526	1646	1327	1019	536	683	853
locus_tag=F7O84_RS13685]	6666666.269962.peg.2081	1182	592	608	463	116	153	203
locus_tag=F7O84_RS13690]	6666666.269962.peg.2082	504	144	115	141	69	53	97
locus_tag=F7O84_RS13695]	6666666.269962.peg.2083	753	439	391	250	106	126	194
locus_tag=F7O84_RS13700]	6666666.269962.peg.2084	327	849	788	572	110	146	236
locus_tag=F7O84_RS13710]	6666666.269962.peg.2085	408	13254	12604	10384	2677	5088	5441
locus_tag=F7O84_RS13715]	6666666.269962.peg.2086	1392	27657	27294	23093	4843	8233	9139
locus_tag=F7O84_RS13720]	6666666.269962.peg.2087	861	7416	6200	4369	1884	3019	3684
locus_tag=F7O84_RS13725]	6666666.269962.peg.2088	1506	18277	15149	11438	3583	6432	6380
locus_tag=F7O84_RS13730]	6666666.269962.peg.2089	549	2057	1413	1093	808	944	1193
locus_tag=F7O84_RS03470]	6666666.269962.peg.209	1041	122	99	88	67	94	82
locus_tag=F7O84_RS13735]	6666666.269962.peg.2090	516	3683	2668	2159	1570	2022	2460
locus_tag=F7O84_RS13740]	6666666.269962.peg.2091	267	3027	3414	3707	661	1102	1122
locus_tag=F7O84_RS13745]	6666666.269962.peg.2092	744	1955	2226	1840	845	677	1370
locus_tag=F7O84_RS13750]	6666666.269962.peg.2093	387	253	269	214	60	55	82
locus_tag=F7O84_RS13755]	6666666.269962.peg.2094	219	23	35	40	38	35	51
locus_tag=F7O84_RS13760]	6666666.269962.peg.2095	855	69	34	31	19	30	31
locus_tag=F7O84_RS13765]	6666666.269962.peg.2096	945	232	208	147	48	69	76
locus_tag=F7O84_RS13770]	6666666.269962.peg.2097	528	17	28	30	7	1	4
locus_tag=F7O84_RS13775]	6666666.269962.peg.2098	1188	4087	4116	3360	779	1241	1557
locus_tag=F7O84_RS13780]	6666666.269962.peg.2099	1068	4738	4855	4072	1077	1352	2095
locus_tag=F7O84_RS14710]	6666666.269962.peg.21	579	8	10	12	3	5	5
locus_tag=F7O84_RS03475]	6666666.269962.peg.210	1419	385	407	465	145	188	193
locus_tag=F7O84_RS13785]	6666666.269962.peg.2100	1293	4892	3728	3182	1188	2004	1962
locus_tag=F7O84_RS13790]	6666666.269962.peg.2101	1551	7278	7942	7026	1145	1904	2412
locus_tag=F7O84_RS13795]	6666666.269962.peg.2102	516	178	167	150	85	71	103
locus_tag=F7O84_RS13800]	6666666.269962.peg.2103	1212	2245	2439	1863	248	481	550
locus_tag=F7O84_RS13805]	6666666.269962.peg.2104	588	47	65	38	7	9	9
locus_tag=F7O84_RS17975]	6666666.269962.peg.2105	993	3629	3039	2558	777	1220	1314
locus_tag=F7O84_RS17980]	6666666.269962.peg.2106	774	3833	3731	3402	988	1411	1690
locus_tag=F7O84_RS17985]	6666666.269962.peg.2107	813	14852	13311	9860	2834	4596	5203
locus_tag=F7O84_RS17990]	6666666.269962.peg.2108	333	1949	1618	1311	817	768	1417
locus_tag=F7O84_RS17995]	6666666.269962.peg.2109	2217	563	495	432	187	199	285
locus_tag=F7O84_RS03480]	6666666.269962.peg.211	1191	514	485	350	155	257	303
locus_tag=F7O84_RS18000]	6666666.269962.peg.2110	738	39	33	36	17	7	20
locus_tag=F7O84_RS18005]	6666666.269962.peg.2111	417	645	493	331	408	443	602
locus_tag=F7O84_RS18010]	6666666.269962.peg.2112	456	112	180	153	33	14	17
locus_tag=F7O84_RS18015]	6666666.269962.peg.2113	1002	361	456	332	66	25	59
locus_tag=F7O84_RS18020]	6666666.269962.peg.2114	882	1273	1035	827	274	387	471
locus_tag=F7O84_RS18025]	6666666.269962.peg.2115	1275	681	604	488	195	200	310
locus_tag=F7O84_RS18030]	6666666.269962.peg.2116	1350	1317	1109	999	287	387	409
locus_tag=F7O84_RS18035]	6666666.269962.peg.2117	264	59	45	49	37	28	47
locus_tag=F7O84_RS18040]	6666666.269962.peg.2118	1659	2183	1951	1721	696	931	1078
locus_tag=F7O84_RS18045]	6666666.269962.peg.2119	657	786	672	537	230	223	359
locus_tag=F7O84_RS11290]	6666666.269962.peg.212	1290	749	850	690	94	131	183
locus_tag=F7O84_RS18050]	6666666.269962.peg.2120	2049	5409	4168	2914	1033	1518	2026
locus_tag=F7O84_RS18055]	6666666.269962.peg.2121	1527	384	383	319	98	81	157
locus_tag=F7O84_RS18060]	6666666.269962.peg.2122	543	399	359	294	96	118	165
locus_tag=F7O84_RS18065]	6666666.269962.peg.2123	1041	319	309	254	126	103	170
locus_tag=F7O84_RS18070]	6666666.269962.peg.2124	1008	543	465	430	160	194	221
locus_tag=F7O84_RS18075]	6666666.269962.peg.2125	1056	1653	1559	1288	400	543	690
locus_tag=F7O84_RS18080]	6666666.269962.peg.2126	777	414	485	395	131	81	192
locus_tag=F7O84_RS18085]	6666666.269962.peg.2127	3018	3166	2797	2538	790	1029	1409
locus_tag=F7O84_RS18090]	6666666.269962.peg.2128	1206	486	538	429	123	174	210
locus_tag=F7O84_RS18095]	6666666.269962.peg.2129	744	408	404	411	121	170	221
locus_tag=F7O84_RS11295]	6666666.269962.peg.213	675	151	128	123	47	56	53
locus_tag=F7O84_RS07525]	6666666.269962.peg.2130	114	27	22	17	19	10	27
locus_tag=F7O84_RS18100]	6666666.269962.peg.2131	687	431	458	355	144	142	248
locus_tag=F7O84_RS18105]	6666666.269962.peg.2132	402	84	126	93	34	11	27
locus_tag=F7O84_RS18110]	6666666.269962.peg.2133	1191	272	300	274	35	44	59
locus_tag=F7O84_RS18115]	6666666.269962.peg.2134	1221	1059	1113	899	252	236	399
locus_tag=F7O84_RS18120]	6666666.269962.peg.2135	1146	621	633	560	122	115	200
locus_tag=F7O84_RS18125]	6666666.269962.peg.2136	1098	290	339	298	93	60	120
locus_tag=F7O84_RS18130]	6666666.269962.peg.2137	1812	252	266	216	110	95	195
locus_tag=F7O84_RS18135]	6666666.269962.peg.2138	375	2719	2785	2909	378	594	588
locus_tag=F7O84_RS18140]	6666666.269962.peg.2139	234	2346	1708	1594	690	569	1047
locus_tag=F7O84_RS11300]	6666666.269962.peg.214	480	30	18	30	5	4	10
locus_tag=F7O84_RS18145]	6666666.269962.peg.2140	1020	810	864	565	351	305	585
locus_tag=F7O84_RS18150]	6666666.269962.peg.2141	192	307	312	285	199	107	350
locus_tag=F7O84_RS18155]	6666666.269962.peg.2142	672	629	553	513	142	138	244
locus_tag=F7O84_RS18160]	6666666.269962.peg.2143	858	919	902	802	295	308	406
locus_tag=F7O84_RS18165]	6666666.269962.peg.2144	1086	1636	1436	1138	423	537	684
locus_tag=F7O84_RS18170]	6666666.269962.peg.2145	687	1382	1022	672	373	441	615
locus_tag=F7O84_RS18175]	6666666.269962.peg.2146	909	1239	1216	931	288	293	447
locus_tag=F7O84_RS18180]	6666666.269962.peg.2147	1269	3311	3090	2234	949	1256	1642
locus_tag=F7O84_RS18185]	6666666.269962.peg.2148	1248	5839	4506	2995	1024	1821	1923
locus_tag=F7O84_RS18190]	6666666.269962.peg.2149	903	2350	2270	2122	475	770	843
locus_tag=F7O84_RS11305]	6666666.269962.peg.215	798	248	243	160	48	84	108
locus_tag=F7O84_RS18195]	6666666.269962.peg.2150	1554	635	614	470	73	111	124
locus_tag=F7O84_RS18200]	6666666.269962.peg.2151	303	354	342	264	104	125	180
locus_tag=F7O84_RS18205]	6666666.269962.peg.2152	318	5286	4599	3412	623	1016	1256
locus_tag=F7O84_RS18210]	6666666.269962.peg.2153	681	10990	9562	7375	1904	2712	3260
locus_tag=F7O84_RS18215]	6666666.269962.peg.2154	621	7288	6663	6623	665	1212	1220
locus_tag=F7O84_RS18220]	6666666.269962.peg.2155	300	2521	2488	1880	716	860	1224
locus_tag=F7O84_RS18225]	6666666.269962.peg.2156	849	13113	11865	10142	1802	3031	3319
locus_tag=F7O84_RS18230]	6666666.269962.peg.2157	282	2988	2420	1799	572	835	977
locus_tag=F7O84_RS18235]	6666666.269962.peg.2158	390	2040	1807	1425	492	506	643
locus_tag=F7O84_RS18240]	6666666.269962.peg.2159	657	5932	5094	4226	959	1188	1473
locus_tag=F7O84_RS11310]	6666666.269962.peg.216	1167	63	48	54	17	10	13
locus_tag=F7O84_RS18245]	6666666.269962.peg.2160	438	5936	4269	3552	878	1607	1666
locus_tag=F7O84_RS18250]	6666666.269962.peg.2161	201	580	520	394	184	180	262
locus_tag=F7O84_RS18255]	6666666.269962.peg.2162	255	305	335	308	148	51	163
locus_tag=F7O84_RS18260]	6666666.269962.peg.2163	369	3732	2981	2453	624	1026	1036
locus_tag=F7O84_RS18265]	6666666.269962.peg.2164	312	1289	1076	976	367	458	608
locus_tag=F7O84_RS18270]	6666666.269962.peg.2165	540	8317	6177	4440	1499	2235	2709
locus_tag=F7O84_RS18275]	6666666.269962.peg.2166	186	1389	1092	865	268	430	489
locus_tag=F7O84_RS18280]	6666666.269962.peg.2167	402	3477	2517	1838	511	677	929
locus_tag=F7O84_RS18285]	6666666.269962.peg.2168	540	7711	8180	7544	1228	1513	2028
locus_tag=F7O84_RS18290]	6666666.269962.peg.2169	369	5431	4502	3293	1146	1537	1973
locus_tag=F7O84_RS11315]	6666666.269962.peg.217	1077	1749	1426	1284	331	499	501
locus_tag=F7O84_RS18295]	6666666.269962.peg.2170	510	12072	11312	10007	1152	2067	2218
locus_tag=F7O84_RS18300]	6666666.269962.peg.2171	183	2740	2243	1930	314	596	622
locus_tag=F7O84_RS18305]	6666666.269962.peg.2172	441	9171	10460	11430	1251	1803	2197
locus_tag=F7O84_RS18310]	6666666.269962.peg.2173	1317	15931	15307	12233	2753	3200	5478
locus_tag=F7O84_RS18315]	6666666.269962.peg.2174	645	7689	7560	6706	915	1330	1420
locus_tag=F7O84_RS18320]	6666666.269962.peg.2175	759	11009	10561	8039	1079	1793	2025
locus_tag=F7O84_RS18325]	6666666.269962.peg.2176	282	2915	2480	1849	452	637	926
locus_tag=F7O84_RS18330]	6666666.269962.peg.2177	219	614	747	530	206	130	316
locus_tag=F7O84_RS18340]	6666666.269962.peg.2178	369	10953	8980	6201	1334	2059	2804
locus_tag=F7O84_RS18345]	6666666.269962.peg.2179	396	19581	21572	17340	2335	3564	4063
locus_tag=F7O84_RS11320]	6666666.269962.peg.218	828	870	786	592	229	321	425
locus_tag=F7O84_RS18350]	6666666.269962.peg.2180	594	11095	10373	7556	1782	1717	3258
locus_tag=F7O84_RS18355]	6666666.269962.peg.2181	960	25042	21718	16394	3875	5895	7745
locus_tag=F7O84_RS18360]	6666666.269962.peg.2182	534	10992	9562	6662	2298	2473	4413
locus_tag=F7O84_RS18365]	6666666.269962.peg.2183	861	94	123	98	40	24	59
locus_tag=F7O84_RS18370]	6666666.269962.peg.2184	828	4706	3997	2817	704	1311	1433
locus_tag=F7O84_RS18375]	6666666.269962.peg.2185	804	3711	3776	2879	932	1228	1816
locus_tag=F7O84_RS18380]	6666666.269962.peg.2186	2637	1494	1377	1070	254	296	417
locus_tag=F7O84_RS18385]	6666666.269962.peg.2187	606	1094	1033	757	149	190	278
locus_tag=F7O84_RS18390]	6666666.269962.peg.2188	300	1667	1251	798	252	396	442
locus_tag=F7O84_RS18395]	6666666.269962.peg.2189	1797	253	275	205	63	104	139
locus_tag=F7O84_RS11325]	6666666.269962.peg.219	954	697	638	475	129	178	167
locus_tag=F7O84_RS18400]	6666666.269962.peg.2190	1602	55	71	60	20	17	28
locus_tag=F7O84_RS18405]	6666666.269962.peg.2191	1791	97	88	91	27	27	50
locus_tag=F7O84_RS18410]	6666666.269962.peg.2192	1359	1140	1120	883	329	435	567
locus_tag=F7O84_RS18415]	6666666.269962.peg.2193	912	114	97	87	10	13	22
locus_tag=F7O84_RS18420]	6666666.269962.peg.2194	834	36	34	27	2	1	3
locus_tag=F7O84_RS18425]	6666666.269962.peg.2195	1161	86	90	98	25	39	50
locus_tag=F7O84_RS18430]	6666666.269962.peg.2196	1728	1154	1044	920	274	443	551
locus_tag=F7O84_RS18435]	6666666.269962.peg.2197	375	34	38	20	10	10	17
locus_tag=F7O84_RS18440]	6666666.269962.peg.2198	1290	255	242	211	63	69	115
locus_tag=F7O84_RS18445]	6666666.269962.peg.2199	750	212	287	209	144	167	238
locus_tag=F7O84_RS14705]	6666666.269962.peg.22	525	20	21	16	6	7	14
locus_tag=F7O84_RS11330]	6666666.269962.peg.220	210	5035	3832	3252	1376	1602	2375
locus_tag=F7O84_RS18450]	6666666.269962.peg.2200	732	137	108	81	42	56	85
locus_tag=F7O84_RS18455]	6666666.269962.peg.2201	744	132	138	114	32	62	54
locus_tag=F7O84_RS18460]	6666666.269962.peg.2202	2625	1765	1651	1250	725	1069	1542
locus_tag=F7O84_RS18465]	6666666.269962.peg.2203	1125	39	58	31	11	19	23
locus_tag=F7O84_RS18470]	6666666.269962.peg.2204	1473	685	687	528	188	291	346
locus_tag=F7O84_RS18475]	6666666.269962.peg.2205	1473	735	705	619	208	412	411
locus_tag=F7O84_RS18480]	6666666.269962.peg.2206	1236	8115	7123	6678	6214	8679	9198
locus_tag=F7O84_RS18485]	6666666.269962.peg.2207	852	15466	14342	11493	6514	10912	11070
locus_tag=F7O84_RS18490]	6666666.269962.peg.2208	852	10148	10043	8085	5952	8344	10400
locus_tag=F7O84_RS18495]	6666666.269962.peg.2209	801	5121	4792	4190	3173	4294	5653
locus_tag=F7O84_RS11335]	6666666.269962.peg.221	1428	7736	7300	5698	1939	3051	3533
locus_tag=F7O84_RS18500]	6666666.269962.peg.2210	738	3672	3423	3273	3960	5515	6138
locus_tag=F7O84_RS18505]	6666666.269962.peg.2211	966	697	582	551	1456	1222	1850
locus_tag=F7O84_RS18510]	6666666.269962.peg.2212	429	3968	3366	2420	2068	1878	3331
locus_tag=F7O84_RS18515]	6666666.269962.peg.2213	387	15762	15564	13854	3572	6190	7082
locus_tag=F7O84_RS08915]	6666666.269962.peg.2214	117	7032	5288	3324	871	2074	2213
locus_tag=F7O84_RS18520]	6666666.269962.peg.2215	1056	211	192	172	30	32	45
locus_tag=F7O84_RS18525]	6666666.269962.peg.2216	588	86	56	55	20	27	19
locus_tag=F7O84_RS18530]	6666666.269962.peg.2217	249	3	1	0	0	0	2
locus_tag=F7O84_RS18535]	6666666.269962.peg.2218	1383	175	250	197	48	30	73
locus_tag=F7O84_RS18540]	6666666.269962.peg.2219	951	171	186	138	48	37	46
locus_tag=F7O84_RS11340]	6666666.269962.peg.222	630	45	25	22	19	25	40
locus_tag=F7O84_RS18545]	6666666.269962.peg.2220	765	168	93	97	82	76	98
locus_tag=F7O84_RS18550]	6666666.269962.peg.2221	873	300	184	157	105	134	143
locus_tag=F7O84_RS18555]	6666666.269962.peg.2222	816	61	85	79	25	12	23
locus_tag=F7O84_RS18560]	6666666.269962.peg.2223	1029	656	604	504	112	205	223
locus_tag=F7O84_RS18565]	6666666.269962.peg.2224	609	40	21	13	14	11	13
locus_tag=F7O84_RS18570]	6666666.269962.peg.2225	1146	62	65	43	17	15	34
locus_tag=F7O84_RS18575]	6666666.269962.peg.2226	996	273	211	191	68	109	89
locus_tag=F7O84_RS18580]	6666666.269962.peg.2227	975	280	268	212	71	85	125
locus_tag=F7O84_RS18585]	6666666.269962.peg.2228	1758	40	39	28	19	14	18
locus_tag=F7O84_RS18590]	6666666.269962.peg.2229	564	900	691	599	341	565	647
locus_tag=F7O84_RS03865]	6666666.269962.peg.223	114	0	3	0	0	0	0
locus_tag=F7O84_RS18595]	6666666.269962.peg.2230	888	41	13	17	27	45	38
locus_tag=F7O84_RS18600]	6666666.269962.peg.2231	747	132	128	90	19	23	53
locus_tag=F7O84_RS18605]	6666666.269962.peg.2232	969	1094	904	679	270	355	559
locus_tag=F7O84_RS18610]	6666666.269962.peg.2233	435	11	12	8	4	6	9
locus_tag=F7O84_RS18615]	6666666.269962.peg.2234	450	37	40	30	6	10	12
locus_tag=F7O84_RS18620]	6666666.269962.peg.2235	348	32	43	19	25	27	45
locus_tag=F7O84_RS18625]	6666666.269962.peg.2236	537	257	277	226	75	83	124
locus_tag=F7O84_RS18630]	6666666.269962.peg.2237	474	20	35	43	6	6	11
locus_tag=F7O84_RS18635]	6666666.269962.peg.2238	309	22	19	21	8	13	11
locus_tag=F7O84_RS18640]	6666666.269962.peg.2239	903	75	62	79	34	39	44
locus_tag=F7O84_RS11345]	6666666.269962.peg.224	1827	5686	5136	3793	603	1012	1218
locus_tag=F7O84_RS18645]	6666666.269962.peg.2240	438	62	45	40	6	20	22
locus_tag=F7O84_RS18650]	6666666.269962.peg.2241	708	183	150	138	35	61	75
locus_tag=F7O84_RS18655]	6666666.269962.peg.2242	573	626	550	368	101	165	179
locus_tag=F7O84_RS18660]	6666666.269962.peg.2243	453	68	55	52	13	9	13
locus_tag=F7O84_RS16165]	6666666.269962.peg.2244	396	294	171	185	160	142	170
locus_tag=F7O84_RS16170]	6666666.269962.peg.2245	465	158	240	196	31	4	25
locus_tag=F7O84_RS09865]	6666666.269962.peg.2246	231	49	54	59	1	2	1
locus_tag=F7O84_RS11275]	6666666.269962.peg.2247	2289	169	143	140	32	43	64
locus_tag=F7O84_RS11270]	6666666.269962.peg.2248	888	55	58	53	14	18	30
locus_tag=F7O84_RS11265]	6666666.269962.peg.2249	846	53	47	33	13	16	29
locus_tag=F7O84_RS11350]	6666666.269962.peg.225	885	333	393	220	75	109	169
locus_tag=F7O84_RS11260]	6666666.269962.peg.2250	1692	30	13	15	7	2	10
locus_tag=F7O84_RS11255]	6666666.269962.peg.2251	1020	69	61	53	18	10	13
locus_tag=F7O84_RS11250]	6666666.269962.peg.2252	666	768	556	404	201	311	388
locus_tag=F7O84_RS11245]	6666666.269962.peg.2253	798	68	69	60	66	70	78
locus_tag=F7O84_RS11240]	6666666.269962.peg.2254	1263	285	229	237	116	267	240
locus_tag=F7O84_RS11235]	6666666.269962.peg.2255	873	41	43	50	23	26	51
locus_tag=F7O84_RS11230]	6666666.269962.peg.2256	837	38	33	30	37	35	61
locus_tag=F7O84_RS11225]	6666666.269962.peg.2257	798	40	45	36	55	66	55
locus_tag=F7O84_RS11220]	6666666.269962.peg.2258	939	58	57	39	21	49	49
locus_tag=F7O84_RS11215]	6666666.269962.peg.2259	396	3	2	2	5	6	12
locus_tag=F7O84_RS11355]	6666666.269962.peg.226	819	185	255	183	71	43	100
locus_tag=F7O84_RS11210]	6666666.269962.peg.2260	660	40	27	22	33	27	40
locus_tag=F7O84_RS11205]	6666666.269962.peg.2261	426	27	18	16	22	50	48
locus_tag=F7O84_RS11200]	6666666.269962.peg.2262	462	372	399	236	200	314	448
locus_tag=F7O84_RS11195]	6666666.269962.peg.2263	864	591	515	293	283	377	553
locus_tag=F7O84_RS11190]	6666666.269962.peg.2264	873	207	218	162	49	82	111
locus_tag=F7O84_RS11185]	6666666.269962.peg.2265	1746	831	859	607	221	216	353
locus_tag=F7O84_RS11180]	6666666.269962.peg.2266	396	313	254	178	69	97	112
locus_tag=F7O84_RS11175]	6666666.269962.peg.2267	894	697	655	498	137	141	211
locus_tag=F7O84_RS11170]	6666666.269962.peg.2268	1065	9526	6671	4523	1355	1941	2499
locus_tag=F7O84_RS11165]	6666666.269962.peg.2269	891	819	787	685	145	127	244
locus_tag=F7O84_RS11360]	6666666.269962.peg.227	1761	77	74	76	45	62	49
locus_tag=F7O84_RS11160]	6666666.269962.peg.2270	1008	256	281	224	33	38	57
locus_tag=F7O84_RS11155]	6666666.269962.peg.2271	753	246	236	216	23	29	51
locus_tag=F7O84_RS11150]	6666666.269962.peg.2272	885	424	394	347	137	174	215
locus_tag=F7O84_RS11145]	6666666.269962.peg.2273	1911	2611	2677	2037	300	430	541
locus_tag=F7O84_RS11140]	6666666.269962.peg.2274	441	439	382	246	106	141	190
locus_tag=F7O84_RS11135]	6666666.269962.peg.2275	1293	5379	3700	2602	1380	2390	2806
locus_tag=F7O84_RS18695]	6666666.269962.peg.2276	132	7	8	4	1	0	3
locus_tag=F7O84_RS11130]	6666666.269962.peg.2277	1335	1047	1081	850	150	254	294
locus_tag=F7O84_RS11125]	6666666.269962.peg.2278	549	485	529	355	89	148	185
locus_tag=F7O84_RS11115]	6666666.269962.peg.2279	348	22	44	41	8	1	5
locus_tag=F7O84_RS11365]	6666666.269962.peg.228	1140	64	49	43	23	43	30
locus_tag=F7O84_RS11110]	6666666.269962.peg.2280	444	28	42	28	18	11	14
locus_tag=F7O84_RS11105]	6666666.269962.peg.2281	858	516	489	546	165	241	243
locus_tag=F7O84_RS11100]	6666666.269962.peg.2282	240	46	43	52	23	17	25
locus_tag=F7O84_RS11095]	6666666.269962.peg.2283	1578	5553	6100	5147	1175	2372	2597
locus_tag=F7O84_RS11090]	6666666.269962.peg.2284	936	4579	4382	3830	806	1449	1596
locus_tag=F7O84_RS11085]	6666666.269962.peg.2285	357	62	56	22	15	10	19
locus_tag=F7O84_RS11080]	6666666.269962.peg.2286	930	3513	2931	2265	1038	1488	2194
locus_tag=F7O84_RS11075]	6666666.269962.peg.2287	837	257	222	198	31	59	64
locus_tag=F7O84_RS11070]	6666666.269962.peg.2288	1029	330	314	260	102	133	144
locus_tag=F7O84_RS11065]	6666666.269962.peg.2289	939	358	281	196	94	141	143
locus_tag=F7O84_RS11370]	6666666.269962.peg.229	1263	150	151	137	58	104	114
locus_tag=F7O84_RS11060]	6666666.269962.peg.2290	192	2	2	0	1	2	1
locus_tag=F7O84_RS11055]	6666666.269962.peg.2291	636	49	50	66	16	21	14
locus_tag=F7O84_RS11050]	6666666.269962.peg.2292	654	63	77	66	19	17	33
locus_tag=F7O84_RS11045]	6666666.269962.peg.2293	321	872	593	385	320	385	525
locus_tag=F7O84_RS11040]	6666666.269962.peg.2294	1224	2272	2596	2106	351	573	748
locus_tag=F7O84_RS11035]	6666666.269962.peg.2295	927	404	336	289	60	84	129
locus_tag=F7O84_RS11030]	6666666.269962.peg.2296	669	428	551	478	156	63	158
locus_tag=F7O84_RS11025]	6666666.269962.peg.2297	333	54	67	54	31	9	24
locus_tag=F7O84_RS11020]	6666666.269962.peg.2298	1017	825	790	523	179	159	249
locus_tag=F7O84_RS11015]	6666666.269962.peg.2299	687	21772	21742	18883	5264	7164	10474
locus_tag=F7O84_RS14700]	6666666.269962.peg.23	1005	64	74	47	27	28	51
locus_tag=F7O84_RS11375]	6666666.269962.peg.230	912	18	21	13	15	25	26
locus_tag=F7O84_RS11010]	6666666.269962.peg.2300	1107	158	208	140	76	71	128
locus_tag=F7O84_RS11005]	6666666.269962.peg.2301	1017	779	739	528	233	358	426
locus_tag=F7O84_RS11000]	6666666.269962.peg.2302	1026	0	6	1	2	0	7
locus_tag=F7O84_RS10995]	6666666.269962.peg.2303	675	4	1	3	0	0	2
locus_tag=F7O84_RS10990]	6666666.269962.peg.2304	2286	17	16	15	5	3	12
locus_tag=F7O84_RS10985]	6666666.269962.peg.2305	7629	238	179	191	53	85	68
locus_tag=F7O84_RS10980]	6666666.269962.peg.2306	324	4	7	15	9	0	5
locus_tag=F7O84_RS10975]	6666666.269962.peg.2307	255	0	2	0	1	0	2
locus_tag=F7O84_RS10970]	6666666.269962.peg.2308	357	0	1	1	0	0	1
locus_tag=F7O84_RS10965]	6666666.269962.peg.2309	906	26	29	21	6	10	4
locus_tag=F7O84_RS11380]	6666666.269962.peg.231	1080	14	15	8	24	14	14
locus_tag=F7O84_RS10960]	6666666.269962.peg.2310	462	31	23	14	2	10	8
locus_tag=F7O84_RS10955]	6666666.269962.peg.2311	576	41	27	25	4	10	15
locus_tag=F7O84_RS10950]	6666666.269962.peg.2312	1233	19	17	15	4	1	9
locus_tag=F7O84_RS10945]	6666666.269962.peg.2313	273	89	60	41	19	24	49
locus_tag=F7O84_RS10940]	6666666.269962.peg.2314	534	72	69	37	37	18	34
locus_tag=F7O84_RS10970]	6666666.269962.peg.2315	156	8	17	20	0	1	0
locus_tag=F7O84_RS10935]	6666666.269962.peg.2316	906	18	21	22	10	9	8
locus_tag=F7O84_RS07580]	6666666.269962.peg.2317	120	0	0	0	0	0	0
locus_tag=F7O84_RS10930]	6666666.269962.peg.2318	462	1	3	0	0	0	1
locus_tag=F7O84_RS10925]	6666666.269962.peg.2319	687	9	5	4	1	4	4
locus_tag=F7O84_RS11385]	6666666.269962.peg.232	2514	37	40	42	38	43	56
locus_tag=F7O84_RS10920]	6666666.269962.peg.2320	354	3	4	0	1	0	0
locus_tag=F7O84_RS10920]	6666666.269962.peg.2321	882	8	13	7	1	2	1
locus_tag=F7O84_RS10915]	6666666.269962.peg.2322	120	0	0	2	2	0	0
locus_tag=F7O84_RS10910]	6666666.269962.peg.2323	591	7	3	4	0	0	2
locus_tag=F7O84_RS10905]	6666666.269962.peg.2324	255	26	18	19	9	13	16
locus_tag=F7O84_RS10895]	6666666.269962.peg.2325	381	0	0	1	0	0	0
locus_tag=F7O84_RS10890]	6666666.269962.peg.2326	789	1	6	3	6	6	7
locus_tag=F7O84_RS10885]	6666666.269962.peg.2327	399	4	10	9	2	0	0
locus_tag=F7O84_RS10880]	6666666.269962.peg.2328	696	13	15	9	7	5	6
locus_tag=F7O84_RS10875]	6666666.269962.peg.2329	1005	36	36	35	8	21	23
locus_tag=F7O84_RS11390]	6666666.269962.peg.233	837	7	7	5	7	6	8
locus_tag=F7O84_RS10870]	6666666.269962.peg.2330	558	12	16	13	2	2	2
locus_tag=F7O84_RS10865]	6666666.269962.peg.2331	330	1	7	3	0	0	0
locus_tag=F7O84_RS10860]	6666666.269962.peg.2332	1524	407	381	287	164	119	253
locus_tag=F7O84_RS10855]	6666666.269962.peg.2333	1785	363	419	270	88	87	125
locus_tag=F7O84_RS10850]	6666666.269962.peg.2334	1338	1349	1199	878	186	306	373
locus_tag=F7O84_RS10845]	6666666.269962.peg.2335	933	114	117	64	21	24	44
locus_tag=F7O84_RS10840]	6666666.269962.peg.2336	852	159	197	156	22	48	51
locus_tag=F7O84_RS10835]	6666666.269962.peg.2337	3150	606	590	450	71	119	119
locus_tag=F7O84_RS10830]	6666666.269962.peg.2338	1326	213	213	179	28	38	28
locus_tag=F7O84_RS10825]	6666666.269962.peg.2339	1770	5041	4967	3633	923	1378	1850
locus_tag=F7O84_RS11395]	6666666.269962.peg.234	876	17	12	10	6	11	14
locus_tag=F7O84_RS10820]	6666666.269962.peg.2340	837	127	121	88	29	13	23
locus_tag=F7O84_RS10815]	6666666.269962.peg.2341	387	41	59	46	19	11	25
locus_tag=F7O84_RS10810]	6666666.269962.peg.2342	360	1923	2302	2037	450	516	748
locus_tag=F7O84_RS10805]	6666666.269962.peg.2343	1602	2876	2630	1855	595	730	1099
locus_tag=F7O84_RS04420]	6666666.269962.peg.2344	144	120	119	110	9	23	29
locus_tag=F7O84_RS10800]	6666666.269962.peg.2345	900	2376	2010	1493	442	696	807
locus_tag=F7O84_RS10790]	6666666.269962.peg.2346	1002	61	78	56	11	15	21
locus_tag=F7O84_RS10785]	6666666.269962.peg.2347	540	22	16	7	6	7	15
locus_tag=F7O84_RS10780]	6666666.269962.peg.2348	711	429	408	349	56	69	90
locus_tag=F7O84_RS10775]	6666666.269962.peg.2349	312	700	695	601	282	254	424
locus_tag=F7O84_RS11400]	6666666.269962.peg.235	2490	372	425	302	112	139	257
locus_tag=F7O84_RS10770]	6666666.269962.peg.2350	411	549	695	663	402	330	614
locus_tag=F7O84_RS10765]	6666666.269962.peg.2351	609	502	749	574	157	52	171
locus_tag=F7O84_RS10760]	6666666.269962.peg.2352	681	1644	1568	1119	577	774	985
locus_tag=F7O84_RS10755]	6666666.269962.peg.2353	987	463	380	388	159	163	207
locus_tag=F7O84_RS10750]	6666666.269962.peg.2354	2211	3323	2689	1868	889	1147	1531
locus_tag=F7O84_RS10745]	6666666.269962.peg.2355	258	670	813	707	258	83	218
locus_tag=F7O84_RS10740]	6666666.269962.peg.2356	1440	246	219	184	77	99	101
locus_tag=F7O84_RS10735]	6666666.269962.peg.2357	1197	8	8	7	1	3	6
locus_tag=F7O84_RS10730]	6666666.269962.peg.2358	456	92	85	75	91	75	112
locus_tag=F7O84_RS10725]	6666666.269962.peg.2359	1872	126	104	77	36	42	46
locus_tag=F7O84_RS11405]	6666666.269962.peg.236	822	835	779	544	159	273	324
locus_tag=F7O84_RS16350]	6666666.269962.peg.2360	114	0	0	1	0	0	0
locus_tag=F7O84_RS13155]	6666666.269962.peg.2361	315	14	19	18	16	3	14
locus_tag=F7O84_RS13150]	6666666.269962.peg.2362	696	217	267	271	113	113	168
locus_tag=F7O84_RS13145]	6666666.269962.peg.2363	192	5035	3506	2209	1430	2143	2703
locus_tag=F7O84_RS13140]	6666666.269962.peg.2364	1398	294	295	256	67	62	90
locus_tag=F7O84_RS13135]	6666666.269962.peg.2365	1056	215	202	145	50	53	105
locus_tag=F7O84_RS13130]	6666666.269962.peg.2366	1434	295	338	248	105	68	188
locus_tag=F7O84_RS13125]	6666666.269962.peg.2367	1668	106	134	110	34	25	47
locus_tag=F7O84_RS13120]	6666666.269962.peg.2368	726	4	8	2	0	3	1
locus_tag=F7O84_RS13115]	6666666.269962.peg.2369	1305	32	26	36	15	4	21
locus_tag=F7O84_RS11410]	6666666.269962.peg.237	657	322	184	169	76	86	101
locus_tag=F7O84_RS13110]	6666666.269962.peg.2370	576	7295	5836	4152	1484	1022	1836
locus_tag=F7O84_RS13105]	6666666.269962.peg.2371	132	1162	870	1016	802	775	912
locus_tag=F7O84_RS15115]	6666666.269962.peg.2372	123	1667	1464	1982	387	625	572
locus_tag=F7O84_RS13100]	6666666.269962.peg.2373	873	8290	6154	5527	3936	4855	5539
locus_tag=F7O84_RS13095]	6666666.269962.peg.2374	996	5195	3806	3782	5361	4730	6654
locus_tag=F7O84_RS13090]	6666666.269962.peg.2375	837	421	329	382	87	127	124
locus_tag=F7O84_RS13085]	6666666.269962.peg.2376	999	118	113	101	29	39	34
locus_tag=F7O84_RS13080]	6666666.269962.peg.2377	465	88	87	71	34	49	41
locus_tag=F7O84_RS13075]	6666666.269962.peg.2378	822	619	608	562	218	239	376
locus_tag=F7O84_RS13070]	6666666.269962.peg.2379	804	1942	1618	1245	307	493	587
locus_tag=F7O84_RS11415]	6666666.269962.peg.238	222	352	465	409	147	34	102
locus_tag=F7O84_RS13065]	6666666.269962.peg.2380	744	3968	4328	3249	722	1092	1358
locus_tag=F7O84_RS13060]	6666666.269962.peg.2381	1338	414	393	298	81	151	155
locus_tag=F7O84_RS13055]	6666666.269962.peg.2382	690	120	127	94	55	39	77
locus_tag=F7O84_RS13050]	6666666.269962.peg.2383	705	82	111	71	21	22	54
locus_tag=F7O84_RS13045]	6666666.269962.peg.2384	1188	1321	1132	956	334	551	602
locus_tag=F7O84_RS13040]	6666666.269962.peg.2385	1902	187	178	174	100	79	132
locus_tag=F7O84_RS13035]	6666666.269962.peg.2386	1014	974	888	624	201	306	385
locus_tag=F7O84_RS13030]	6666666.269962.peg.2387	756	151	148	109	65	34	82
locus_tag=F7O84_RS13025]	6666666.269962.peg.2388	753	171	154	118	52	68	75
locus_tag=F7O84_RS13020]	6666666.269962.peg.2389	399	60	74	70	0	7	7
locus_tag=F7O84_RS17815]	6666666.269962.peg.239	129	128	177	173	147	56	149
locus_tag=F7O84_RS13015]	6666666.269962.peg.2390	294	38	52	57	21	15	23
locus_tag=F7O84_RS13010]	6666666.269962.peg.2391	2418	612	648	588	228	134	309
locus_tag=F7O84_RS13005]	6666666.269962.peg.2392	1104	20	26	18	8	9	13
locus_tag=F7O84_RS13000]	6666666.269962.peg.2393	915	25	22	22	12	8	20
locus_tag=F7O84_RS12995]	6666666.269962.peg.2394	1599	108	133	116	54	25	78
locus_tag=F7O84_RS12990]	6666666.269962.peg.2395	1032	112	87	68	28	22	47
locus_tag=F7O84_RS12985]	6666666.269962.peg.2396	1446	79	90	73	34	26	43
locus_tag=F7O84_RS12980]	6666666.269962.peg.2397	1017	486	420	292	154	233	245
locus_tag=F7O84_RS12975]	6666666.269962.peg.2398	2397	61	62	47	31	9	25
locus_tag=F7O84_RS12970]	6666666.269962.peg.2399	1419	41	40	21	25	29	36
locus_tag=F7O84_RS14695]	6666666.269962.peg.24	1401	17	7	8	4	10	8
locus_tag=F7O84_RS06790]	6666666.269962.peg.240	150	57	97	98	4	8	9
locus_tag=F7O84_RS12965]	6666666.269962.peg.2400	2670	145	137	134	62	68	77
locus_tag=F7O84_RS12960]	6666666.269962.peg.2401	666	67	52	40	27	26	31
locus_tag=F7O84_RS12955]	6666666.269962.peg.2402	2325	119	140	93	29	28	36
locus_tag=F7O84_RS12950]	6666666.269962.peg.2403	1821	74	73	56	27	30	34
locus_tag=F7O84_RS12945]	6666666.269962.peg.2404	1434	84	60	52	25	34	38
locus_tag=F7O84_RS12940]	6666666.269962.peg.2405	1476	36	42	43	9	17	24
locus_tag=F7O84_RS12935]	6666666.269962.peg.2406	975	76	54	53	15	21	24
locus_tag=F7O84_RS18405]	6666666.269962.peg.2407	258	5	4	4	0	3	0
locus_tag=F7O84_RS12930]	6666666.269962.peg.2408	960	2	7	2	2	1	2
locus_tag=F7O84_RS12925]	6666666.269962.peg.2409	1011	3	10	5	5	1	5
locus_tag=F7O84_RS11420]	6666666.269962.peg.241	2802	12884	12251	10225	2614	4555	5021
locus_tag=F7O84_RS12920]	6666666.269962.peg.2410	393	4	2	1	3	3	0
locus_tag=F7O84_RS12915]	6666666.269962.peg.2411	1059	33	39	28	12	14	14
locus_tag=F7O84_RS12910]	6666666.269962.peg.2412	1539	207	187	198	46	36	73
locus_tag=F7O84_RS12905]	6666666.269962.peg.2413	240	0	0	0	0	0	0
locus_tag=F7O84_RS12900]	6666666.269962.peg.2414	1749	25	38	17	5	6	12
locus_tag=F7O84_RS12895]	6666666.269962.peg.2415	1014	5	3	4	3	3	0
locus_tag=F7O84_RS12890]	6666666.269962.peg.2416	1125	0	6	4	0	1	1
locus_tag=F7O84_RS12885]	6666666.269962.peg.2417	543	4	0	3	0	0	1
locus_tag=F7O84_RS12880]	6666666.269962.peg.2418	1278	41	39	30	14	12	20
locus_tag=F7O84_RS12875]	6666666.269962.peg.2419	915	38	51	35	28	27	69
locus_tag=F7O84_RS11425]	6666666.269962.peg.242	231	665	701	572	122	233	244
locus_tag=F7O84_RS12870]	6666666.269962.peg.2420	1536	45	46	41	15	12	31
locus_tag=F7O84_RS12865]	6666666.269962.peg.2421	945	1	1	1	0	0	0
locus_tag=F7O84_RS12860]	6666666.269962.peg.2422	1482	9	5	6	3	4	8
locus_tag=F7O84_RS12855]	6666666.269962.peg.2423	2091	24	22	26	5	13	7
locus_tag=F7O84_RS12850]	6666666.269962.peg.2424	1083	7	4	4	1	2	0
locus_tag=F7O84_RS12845]	6666666.269962.peg.2425	684	66	64	56	28	17	45
locus_tag=F7O84_RS12840]	6666666.269962.peg.2426	540	4	4	2	2	1	4
locus_tag=F7O84_RS12835]	6666666.269962.peg.2427	1593	1705	1316	1019	408	617	717
locus_tag=F7O84_RS12830]	6666666.269962.peg.2428	831	5397	5551	5439	795	1515	1638
locus_tag=F7O84_RS12825]	6666666.269962.peg.2429	381	211	189	151	43	65	81
locus_tag=F7O84_RS11430]	6666666.269962.peg.243	2604	128	128	115	126	99	202
locus_tag=F7O84_RS12820]	6666666.269962.peg.2430	1104	981	872	758	146	282	311
locus_tag=F7O84_RS12815]	6666666.269962.peg.2431	999	544	527	462	123	205	212
locus_tag=F7O84_RS12810]	6666666.269962.peg.2432	1035	423	420	369	95	166	162
locus_tag=F7O84_RS12805]	6666666.269962.peg.2433	804	290	278	185	59	84	113
locus_tag=F7O84_RS12800]	6666666.269962.peg.2434	480	427	465	382	78	135	115
locus_tag=F7O84_RS17785]	6666666.269962.peg.2435	153	5	4	1	0	1	2
locus_tag=F7O84_RS12795]	6666666.269962.peg.2436	441	53	34	18	19	13	30
locus_tag=F7O84_RS12790]	6666666.269962.peg.2437	495	30	30	16	9	6	10
locus_tag=F7O84_RS12785]	6666666.269962.peg.2438	888	348	310	220	77	144	153
locus_tag=F7O84_RS12780]	6666666.269962.peg.2439	699	147	154	116	54	50	88
locus_tag=F7O84_RS11435]	6666666.269962.peg.244	771	43	24	36	18	38	39
locus_tag=F7O84_RS12775]	6666666.269962.peg.2440	2067	501	525	467	266	308	421
locus_tag=F7O84_RS12770]	6666666.269962.peg.2441	1299	39	36	34	23	45	47
locus_tag=F7O84_RS12765]	6666666.269962.peg.2442	999	70	50	49	21	24	27
locus_tag=F7O84_RS12760]	6666666.269962.peg.2443	975	251	279	185	90	150	169
locus_tag=F7O84_RS12755]	6666666.269962.peg.2444	288	1	1	1	0	1	1
locus_tag=F7O84_RS12750]	6666666.269962.peg.2445	339	20	18	9	2	2	3
locus_tag=F7O84_RS12745]	6666666.269962.peg.2446	1176	19	36	11	8	7	15
locus_tag=F7O84_RS12740]	6666666.269962.peg.2447	1410	34	18	19	10	20	34
locus_tag=F7O84_RS12735]	6666666.269962.peg.2448	657	96	67	59	35	41	51
locus_tag=F7O84_RS12730]	6666666.269962.peg.2449	780	4317	3827	2620	475	685	889
locus_tag=F7O84_RS11440]	6666666.269962.peg.245	603	1	4	7	4	11	10
locus_tag=F7O84_RS12725]	6666666.269962.peg.2450	849	96	116	102	32	22	54
locus_tag=F7O84_RS12720]	6666666.269962.peg.2451	1392	255	252	175	44	45	93
locus_tag=F7O84_RS12715]	6666666.269962.peg.2452	660	63	60	31	18	17	19
locus_tag=F7O84_RS12710]	6666666.269962.peg.2453	765	369	340	302	63	92	137
locus_tag=F7O84_RS12705]	6666666.269962.peg.2454	564	39	58	65	34	10	36
locus_tag=F7O84_RS12700]	6666666.269962.peg.2455	852	7559	6253	4911	1911	2623	2977
locus_tag=F7O84_RS12695]	6666666.269962.peg.2456	651	6647	7373	6740	1551	2322	2826
locus_tag=F7O84_RS12690]	6666666.269962.peg.2457	765	7500	6886	5230	2198	3377	4327
locus_tag=F7O84_RS12685]	6666666.269962.peg.2458	246	34	23	27	18	6	19
locus_tag=F7O84_RS12680]	6666666.269962.peg.2459	1038	138	110	110	56	57	66
locus_tag=F7O84_RS11445]	6666666.269962.peg.246	579	0	2	0	2	2	1
locus_tag=F7O84_RS12675]	6666666.269962.peg.2460	951	11	4	11	5	4	7
locus_tag=F7O84_RS12670]	6666666.269962.peg.2461	897	6	6	12	3	2	9
locus_tag=F7O84_RS12665]	6666666.269962.peg.2462	1602	73	43	36	29	45	53
locus_tag=F7O84_RS12660]	6666666.269962.peg.2463	1749	331	316	226	49	87	111
locus_tag=F7O84_RS12655]	6666666.269962.peg.2464	903	165	152	113	36	25	57
locus_tag=F7O84_RS12650]	6666666.269962.peg.2465	2394	267	252	184	67	100	159
locus_tag=F7O84_RS12645]	6666666.269962.peg.2466	1287	220	225	193	84	65	130
locus_tag=F7O84_RS12640]	6666666.269962.peg.2467	345	133	89	131	79	114	90
locus_tag=F7O84_RS12635]	6666666.269962.peg.2468	1611	401	378	328	101	158	150
locus_tag=F7O84_RS17035]	6666666.269962.peg.2469	126	1	3	2	0	0	1
locus_tag=F7O84_RS11450]	6666666.269962.peg.247	1083	3	7	3	2	0	6
locus_tag=F7O84_RS02125]	6666666.269962.peg.2470	1332	27	40	84	5	20	13
locus_tag=F7O84_RS02130]	6666666.269962.peg.2471	186	17	15	25	3	4	4
locus_tag=F7O84_RS02135]	6666666.269962.peg.2472	1623	6889	8931	11528	1948	3593	3145
locus_tag=F7O84_RS02140]	6666666.269962.peg.2473	459	519	602	457	212	272	346
locus_tag=F7O84_RS02145]	6666666.269962.peg.2474	1101	1002	1234	948	245	193	404
locus_tag=F7O84_RS02150]	6666666.269962.peg.2475	3567	376	447	394	223	139	295
locus_tag=F7O84_RS02155]	6666666.269962.peg.2476	1293	233	228	192	91	86	137
locus_tag=F7O84_RS02160]	6666666.269962.peg.2477	801	92	80	82	35	28	42
locus_tag=F7O84_RS02165]	6666666.269962.peg.2478	1185	176	161	134	113	87	131
locus_tag=F7O84_RS02170]	6666666.269962.peg.2479	708	445	420	366	240	199	347
locus_tag=F7O84_RS11455]	6666666.269962.peg.248	387	0	0	0	0	0	1
locus_tag=F7O84_RS02175]	6666666.269962.peg.2480	1446	6398	5960	5158	908	1738	1876
locus_tag=F7O84_RS02180]	6666666.269962.peg.2481	1431	2505	1978	1437	396	676	814
locus_tag=F7O84_RS02185]	6666666.269962.peg.2482	1761	2072	2249	1702	472	672	1038
locus_tag=F7O84_RS02190]	6666666.269962.peg.2483	885	21	24	26	9	8	12
locus_tag=F7O84_RS02195]	6666666.269962.peg.2484	1281	1994	1637	1627	415	622	616
locus_tag=F7O84_RS02200]	6666666.269962.peg.2485	651	46	53	39	14	10	21
locus_tag=F7O84_RS02205]	6666666.269962.peg.2486	255	86	99	59	34	25	41
locus_tag=F7O84_RS02210]	6666666.269962.peg.2487	597	68	90	56	42	37	51
locus_tag=F7O84_RS02215]	6666666.269962.peg.2488	645	614	729	619	260	122	299
locus_tag=F7O84_RS02225]	6666666.269962.peg.2489	1635	7049	7652	5891	1165	1435	2182
locus_tag=F7O84_RS11460]	6666666.269962.peg.249	195	0	2	1	1	1	1
locus_tag=F7O84_RS02230]	6666666.269962.peg.2490	879	1672	1639	1499	398	536	590
locus_tag=F7O84_RS02235]	6666666.269962.peg.2491	246	311	306	384	71	111	154
locus_tag=F7O84_RS02240]	6666666.269962.peg.2492	621	698	586	620	238	282	358
locus_tag=F7O84_RS02245]	6666666.269962.peg.2493	249	1997	1520	1011	613	927	904
locus_tag=F7O84_RS02250]	6666666.269962.peg.2494	1839	9201	8307	6247	3412	3576	5907
locus_tag=F7O84_RS02255]	6666666.269962.peg.2495	264	1558	1761	1419	137	129	293
locus_tag=F7O84_RS02260]	6666666.269962.peg.2496	1836	17	13	15	11	12	14
locus_tag=F7O84_RS02265]	6666666.269962.peg.2497	1758	18	15	16	7	3	12
locus_tag=F7O84_RS02270]	6666666.269962.peg.2498	972	7	8	2	0	7	1
locus_tag=F7O84_RS02275]	6666666.269962.peg.2499	1296	37	32	20	6	7	12
locus_tag=F7O84_RS14690]	6666666.269962.peg.25	819	4	3	10	3	5	6
locus_tag=F7O84_RS11465]	6666666.269962.peg.250	519	3	9	3	0	0	4
locus_tag=F7O84_RS02280]	6666666.269962.peg.2500	1812	7017	6253	4664	1076	1754	2053
locus_tag=F7O84_RS02285]	6666666.269962.peg.2501	1146	189	200	172	97	111	149
locus_tag=F7O84_RS02290]	6666666.269962.peg.2502	426	1541	1474	1363	386	589	702
locus_tag=F7O84_RS02295]	6666666.269962.peg.2503	771	66	55	40	8	24	31
locus_tag=F7O84_RS02300]	6666666.269962.peg.2504	906	43	39	30	24	25	19
locus_tag=F7O84_RS02305]	6666666.269962.peg.2505	1905	424	406	399	169	234	281
locus_tag=F7O84_RS12995]	6666666.269962.peg.2506	129	0	1	2	0	0	0
locus_tag=F7O84_RS02310]	6666666.269962.peg.2507	1293	1354	1228	823	336	438	700
locus_tag=F7O84_RS02315]	6666666.269962.peg.2508	351	346	303	241	177	191	280
locus_tag=F7O84_RS02320]	6666666.269962.peg.2509	1518	31	27	7	16	22	27
locus_tag=F7O84_RS11470]	6666666.269962.peg.251	957	3	5	1	2	2	5
locus_tag=F7O84_RS02325]	6666666.269962.peg.2510	1482	26	17	11	28	25	33
locus_tag=F7O84_RS02330]	6666666.269962.peg.2511	792	36	26	12	10	26	25
locus_tag=F7O84_RS02335]	6666666.269962.peg.2512	1725	14	10	16	17	30	22
locus_tag=F7O84_RS02340]	6666666.269962.peg.2513	1035	13	21	19	17	25	29
locus_tag=F7O84_RS02345]	6666666.269962.peg.2514	1392	93	85	83	68	80	107
locus_tag=F7O84_RS02350]	6666666.269962.peg.2515	882	9	13	13	7	8	11
locus_tag=F7O84_RS02355]	6666666.269962.peg.2516	843	3	6	3	4	1	2
locus_tag=F7O84_RS02360]	6666666.269962.peg.2517	1248	16	11	15	5	17	12
locus_tag=F7O84_RS02365]	6666666.269962.peg.2518	681	27	29	10	13	11	15
locus_tag=F7O84_RS02370]	6666666.269962.peg.2519	1968	46	53	42	14	31	27
locus_tag=F7O84_RS11475]	6666666.269962.peg.252	240	105	158	105	54	29	91
locus_tag=F7O84_RS02375]	6666666.269962.peg.2520	3066	122	104	88	31	73	80
locus_tag=F7O84_RS02380]	6666666.269962.peg.2521	1707	147	153	104	35	71	96
locus_tag=F7O84_RS02385]	6666666.269962.peg.2522	333	24	15	14	1	4	6
locus_tag=F7O84_RS02390]	6666666.269962.peg.2523	591	2	4	1	2	2	0
locus_tag=F7O84_RS02395]	6666666.269962.peg.2524	363	4	3	4	5	0	3
locus_tag=F7O84_RS02400]	6666666.269962.peg.2525	366	9	18	6	1	0	0
locus_tag=F7O84_RS02405]	6666666.269962.peg.2526	1563	514	553	371	90	110	168
locus_tag=F7O84_RS02410]	6666666.269962.peg.2527	1116	471	427	356	91	177	203
locus_tag=F7O84_RS02415]	6666666.269962.peg.2528	2622	167	174	115	66	98	116
locus_tag=F7O84_RS02420]	6666666.269962.peg.2529	141	263	245	198	342	167	401
locus_tag=F7O84_RS11480]	6666666.269962.peg.253	738	201	177	121	31	32	80
locus_tag=F7O84_RS02425]	6666666.269962.peg.2530	1413	2014	1793	1505	353	530	627
locus_tag=F7O84_RS02430]	6666666.269962.peg.2531	2148	11161	9757	7059	1745	2818	3386
locus_tag=F7O84_RS02435]	6666666.269962.peg.2532	1191	107	107	85	15	18	24
locus_tag=F7O84_RS02440]	6666666.269962.peg.2533	705	1053	1153	876	499	443	864
locus_tag=F7O84_RS02445]	6666666.269962.peg.2534	1470	2163	1892	1436	738	920	1305
locus_tag=F7O84_RS02450]	6666666.269962.peg.2535	2226	3824	3081	2587	976	1388	1616
locus_tag=F7O84_RS02455]	6666666.269962.peg.2536	474	165	148	137	77	87	88
locus_tag=F7O84_RS02460]	6666666.269962.peg.2537	933	647	595	549	183	236	302
locus_tag=F7O84_RS02465]	6666666.269962.peg.2538	714	1622	1557	1317	318	543	603
locus_tag=F7O84_RS02470]	6666666.269962.peg.2539	1356	320	261	189	109	95	142
locus_tag=F7O84_RS11485]	6666666.269962.peg.254	690	459	451	360	101	127	154
locus_tag=F7O84_RS02475]	6666666.269962.peg.2540	1053	163	161	147	54	65	61
locus_tag=F7O84_RS02480]	6666666.269962.peg.2541	744	197	153	146	94	96	105
locus_tag=F7O84_RS02485]	6666666.269962.peg.2542	2082	3057	2177	2064	982	1215	1328
locus_tag=F7O84_RS02490]	6666666.269962.peg.2543	879	1201	1123	988	335	298	459
locus_tag=F7O84_RS02495]	6666666.269962.peg.2544	666	771	525	415	216	365	462
locus_tag=F7O84_RS02500]	6666666.269962.peg.2545	651	168	197	149	60	56	91
locus_tag=F7O84_RS02505]	6666666.269962.peg.2546	1098	321	284	290	145	108	152
locus_tag=F7O84_RS02510]	6666666.269962.peg.2547	855	469	326	351	161	165	165
locus_tag=F7O84_RS02515]	6666666.269962.peg.2548	180	134	169	131	76	54	120
locus_tag=F7O84_RS02520]	6666666.269962.peg.2549	432	7284	3410	1944	335	528	568
locus_tag=F7O84_RS11490]	6666666.269962.peg.255	1056	470	392	400	279	428	374
locus_tag=F7O84_RS02525]	6666666.269962.peg.2550	939	1348	1157	924	427	424	669
locus_tag=F7O84_RS02530]	6666666.269962.peg.2551	516	1296	1214	912	303	288	443
locus_tag=F7O84_RS02535]	6666666.269962.peg.2552	2067	694	709	781	253	302	271
locus_tag=F7O84_RS02540]	6666666.269962.peg.2553	1932	1080	953	792	229	324	397
locus_tag=F7O84_RS02545]	6666666.269962.peg.2554	957	723	695	574	130	152	256
locus_tag=F7O84_RS02550]	6666666.269962.peg.2555	1356	1892	1924	1543	353	502	669
locus_tag=F7O84_RS02555]	6666666.269962.peg.2556	1119	854	895	673	201	159	284
locus_tag=F7O84_RS02560]	6666666.269962.peg.2557	1251	498	382	367	188	204	257
locus_tag=F7O84_RS02565]	6666666.269962.peg.2558	723	108	117	88	43	44	91
locus_tag=F7O84_RS02570]	6666666.269962.peg.2559	1179	10018	9799	9165	1852	3082	3500
locus_tag=F7O84_RS11495]	6666666.269962.peg.256	147	3	7	3	0	1	0
locus_tag=F7O84_RS02575]	6666666.269962.peg.2560	855	3	10	13	7	1	10
locus_tag=F7O84_RS02580]	6666666.269962.peg.2561	741	27	31	26	17	12	30
locus_tag=F7O84_RS02585]	6666666.269962.peg.2562	1620	24	29	23	21	8	19
locus_tag=F7O84_RS02590]	6666666.269962.peg.2563	1473	21	21	13	20	12	18
locus_tag=F7O84_RS02595]	6666666.269962.peg.2564	1083	93	69	81	39	98	92
locus_tag=F7O84_RS02600]	6666666.269962.peg.2565	1521	30	19	12	14	22	26
locus_tag=F7O84_RS02605]	6666666.269962.peg.2566	1053	19	30	17	9	7	12
locus_tag=F7O84_RS02610]	6666666.269962.peg.2567	1029	22	11	12	9	14	15
locus_tag=F7O84_RS02615]	6666666.269962.peg.2568	1071	78	86	72	51	25	58
locus_tag=F7O84_RS02070]	6666666.269962.peg.2569	252	105	91	43	36	49	56
locus_tag=F7O84_RS11500]	6666666.269962.peg.257	876	96	107	67	14	12	11
locus_tag=F7O84_RS02065]	6666666.269962.peg.2570	1113	157	164	155	38	23	34
locus_tag=F7O84_RS02060]	6666666.269962.peg.2571	1350	238	200	159	48	61	99
locus_tag=F7O84_RS02055]	6666666.269962.peg.2572	540	1830	1676	1176	346	567	623
locus_tag=F7O84_RS02050]	6666666.269962.peg.2573	228	517	551	327	274	235	441
locus_tag=F7O84_RS02045]	6666666.269962.peg.2574	987	111	95	76	67	66	83
locus_tag=F7O84_RS02040]	6666666.269962.peg.2575	975	9533	10137	8586	1433	2768	3057
locus_tag=F7O84_RS02035]	6666666.269962.peg.2576	387	272	262	224	141	124	237
locus_tag=F7O84_RS02030]	6666666.269962.peg.2577	1368	2013	1985	1539	509	710	905
locus_tag=F7O84_RS02025]	6666666.269962.peg.2578	759	665	682	643	126	178	184
locus_tag=F7O84_RS02020]	6666666.269962.peg.2579	717	182	219	134	48	58	95
locus_tag=F7O84_RS11505]	6666666.269962.peg.258	999	348	395	328	105	84	152
locus_tag=F7O84_RS02015]	6666666.269962.peg.2580	327	27	37	27	8	0	10
locus_tag=F7O84_RS02010]	6666666.269962.peg.2581	594	1672	1792	1453	368	511	649
locus_tag=F7O84_RS02005]	6666666.269962.peg.2582	768	1068	935	620	250	324	395
locus_tag=F7O84_RS02000]	6666666.269962.peg.2583	393	40	37	26	23	10	40
locus_tag=F7O84_RS01995]	6666666.269962.peg.2584	981	719	711	630	119	113	168
locus_tag=F7O84_RS01990]	6666666.269962.peg.2585	1113	269	230	253	38	44	57
locus_tag=F7O84_RS01985]	6666666.269962.peg.2586	1539	505	360	300	78	87	122
locus_tag=F7O84_RS01980]	6666666.269962.peg.2587	1254	8704	7506	5974	803	1400	1509
locus_tag=F7O84_RS01975]	6666666.269962.peg.2588	2169	1738	1682	1307	241	337	405
locus_tag=F7O84_RS01970]	6666666.269962.peg.2589	513	803	800	1058	239	374	430
locus_tag=F7O84_RS11510]	6666666.269962.peg.259	900	694	647	478	171	239	275
locus_tag=F7O84_RS01965]	6666666.269962.peg.2590	891	349	409	339	71	40	73
locus_tag=F7O84_RS01960]	6666666.269962.peg.2591	681	169	128	126	50	47	71
locus_tag=F7O84_RS01955]	6666666.269962.peg.2592	1053	764	756	628	78	124	120
locus_tag=F7O84_RS01950]	6666666.269962.peg.2593	717	366	360	373	61	68	76
locus_tag=F7O84_RS01945]	6666666.269962.peg.2594	906	114	134	108	55	36	52
locus_tag=F7O84_RS01940]	6666666.269962.peg.2595	1005	321	255	211	200	256	269
locus_tag=F7O84_RS01935]	6666666.269962.peg.2596	831	273	314	278	200	152	225
locus_tag=F7O84_RS01930]	6666666.269962.peg.2597	1506	540	590	455	464	284	605
locus_tag=F7O84_RS01925]	6666666.269962.peg.2598	357	2733	3661	2863	7543	3931	11530
locus_tag=F7O84_RS01920]	6666666.269962.peg.2599	1293	14201	11222	8985	14422	20913	24066
locus_tag=F7O84_RS14685]	6666666.269962.peg.26	936	20	11	11	3	13	10
locus_tag=F7O84_RS11515]	6666666.269962.peg.260	459	542	376	258	70	90	143
locus_tag=F7O84_RS01915]	6666666.269962.peg.2600	522	9608	9060	7558	10224	13082	17288
locus_tag=F7O84_RS01910]	6666666.269962.peg.2601	1077	83052	67685	46497	74573	110135	140741
locus_tag=F7O84_RS01905]	6666666.269962.peg.2602	933	622	656	482	258	244	431
locus_tag=F7O84_RS01900]	6666666.269962.peg.2603	1956	1348	1206	918	208	226	309
locus_tag=F7O84_RS01895]	6666666.269962.peg.2604	783	422	375	268	78	88	110
locus_tag=F7O84_RS01890]	6666666.269962.peg.2605	432	9	15	13	3	1	5
locus_tag=F7O84_RS01885]	6666666.269962.peg.2606	1203	12981	14001	12094	2536	4378	4699
locus_tag=F7O84_RS01875]	6666666.269962.peg.2607	897	22	20	20	6	4	5
locus_tag=F7O84_RS01870]	6666666.269962.peg.2608	558	3199	3432	3083	794	807	1241
locus_tag=F7O84_RS01865]	6666666.269962.peg.2609	507	74	81	76	13	5	24
locus_tag=F7O84_RS11520]	6666666.269962.peg.261	642	44	54	43	15	14	42
locus_tag=F7O84_RS01860]	6666666.269962.peg.2610	909	149	163	136	31	21	33
locus_tag=F7O84_RS01855]	6666666.269962.peg.2611	867	1479	1394	1266	256	391	473
locus_tag=F7O84_RS01850]	6666666.269962.peg.2612	1014	4429	3804	3166	3327	3970	5761
locus_tag=F7O84_RS01845]	6666666.269962.peg.2613	1062	119521	95454	66553	51503	87500	99527
locus_tag=F7O84_RS01840]	6666666.269962.peg.2614	1020	8144	6805	6262	3385	3655	4937
locus_tag=F7O84_RS01835]	6666666.269962.peg.2615	1530	11771	9095	7033	4506	4940	7309
locus_tag=F7O84_RS01830]	6666666.269962.peg.2616	834	450	353	284	69	69	107
locus_tag=F7O84_RS01825]	6666666.269962.peg.2617	1398	1067	1017	872	126	161	221
locus_tag=F7O84_RS01820]	6666666.269962.peg.2618	1125	20031	19214	15470	1591	2112	3063
locus_tag=F7O84_RS01815]	6666666.269962.peg.2619	1203	15411	13054	9536	1490	2193	2742
locus_tag=F7O84_RS11525]	6666666.269962.peg.262	807	41	26	28	6	10	14
locus_tag=F7O84_RS01810]	6666666.269962.peg.2620	852	3615	3102	2424	398	544	652
locus_tag=F7O84_RS01805]	6666666.269962.peg.2621	1446	14345	13301	11469	911	1456	1657
locus_tag=F7O84_RS01800]	6666666.269962.peg.2622	750	970	912	788	163	168	296
locus_tag=F7O84_RS01795]	6666666.269962.peg.2623	453	571	474	382	117	156	198
locus_tag=F7O84_RS01790]	6666666.269962.peg.2624	1701	44	54	42	22	26	26
locus_tag=F7O84_RS01785]	6666666.269962.peg.2625	315	293	268	230	51	105	119
locus_tag=F7O84_RS01780]	6666666.269962.peg.2626	699	460	511	368	111	133	145
locus_tag=F7O84_RS01775]	6666666.269962.peg.2627	789	170	184	141	18	12	26
locus_tag=F7O84_RS01770]	6666666.269962.peg.2628	1557	4462	4335	3904	725	1309	1464
locus_tag=F7O84_RS01765]	6666666.269962.peg.2629	744	512	535	481	67	96	102
locus_tag=F7O84_RS11530]	6666666.269962.peg.263	984	96	96	81	19	31	28
locus_tag=F7O84_RS01760]	6666666.269962.peg.2630	606	285	377	254	89	58	155
locus_tag=F7O84_RS01755]	6666666.269962.peg.2631	720	646	609	487	167	121	258
locus_tag=F7O84_RS01750]	6666666.269962.peg.2632	648	329	251	196	85	85	121
locus_tag=F7O84_RS01745]	6666666.269962.peg.2633	1455	44960	43658	33258	3558	6034	6467
locus_tag=F7O84_RS01740]	6666666.269962.peg.2634	492	163	156	105	54	29	42
locus_tag=F7O84_RS01735]	6666666.269962.peg.2635	672	241	343	268	104	48	150
locus_tag=F7O84_RS01730]	6666666.269962.peg.2636	777	50	48	48	14	7	12
locus_tag=F7O84_RS01725]	6666666.269962.peg.2637	804	159	156	108	20	30	55
locus_tag=F7O84_RS01720]	6666666.269962.peg.2638	801	502	512	376	52	71	98
locus_tag=F7O84_RS01715]	6666666.269962.peg.2639	186	3	2	1	0	0	2
locus_tag=F7O84_RS11535]	6666666.269962.peg.264	309	76	65	30	17	30	27
locus_tag=F7O84_RS01710]	6666666.269962.peg.2640	1623	8749	7487	5448	2330	3305	3836
locus_tag=F7O84_RS01705]	6666666.269962.peg.2641	285	1234	1191	1048	268	356	417
locus_tag=F7O84_RS01700]	6666666.269962.peg.2642	906	156	134	162	50	36	58
locus_tag=F7O84_RS01695]	6666666.269962.peg.2643	1005	764	802	676	183	185	296
locus_tag=F7O84_RS01690]	6666666.269962.peg.2644	690	265	232	192	40	57	63
locus_tag=F7O84_RS01685]	6666666.269962.peg.2645	552	96	111	84	23	20	32
locus_tag=F7O84_RS01680]	6666666.269962.peg.2646	1989	775	813	622	255	270	380
locus_tag=F7O84_RS01675]	6666666.269962.peg.2647	252	10	10	17	0	0	3
locus_tag=F7O84_RS01675]	6666666.269962.peg.2648	156	16	27	21	6	3	7
locus_tag=F7O84_RS01670]	6666666.269962.peg.2649	438	23	27	20	8	3	6
locus_tag=F7O84_RS11540]	6666666.269962.peg.265	2694	906	927	825	125	198	244
locus_tag=F7O84_RS01665]	6666666.269962.peg.2650	915	143	89	71	25	27	26
locus_tag=F7O84_RS01660]	6666666.269962.peg.2651	939	25	21	12	7	9	8
locus_tag=F7O84_RS01655]	6666666.269962.peg.2652	1485	1428	1126	1070	245	364	344
locus_tag=F7O84_RS01650]	6666666.269962.peg.2653	4557	3218	2975	2412	556	731	915
locus_tag=F7O84_RS01645]	6666666.269962.peg.2654	885	222	296	227	91	70	153
locus_tag=F7O84_RS01640]	6666666.269962.peg.2655	906	568	688	464	105	121	212
locus_tag=F7O84_RS01635]	6666666.269962.peg.2656	3201	28388	26273	21068	4253	6611	7888
locus_tag=F7O84_RS01630]	6666666.269962.peg.2657	1086	4486	3555	2819	850	1082	1305
locus_tag=F7O84_RS01625]	6666666.269962.peg.2658	1266	1242	1001	855	158	256	262
locus_tag=F7O84_RS01620]	6666666.269962.peg.2659	195	6	3	5	1	1	1
locus_tag=F7O84_RS11545]	6666666.269962.peg.266	1344	302	289	257	76	105	111
locus_tag=F7O84_RS01615]	6666666.269962.peg.2660	1071	2031	1481	1578	500	715	721
locus_tag=F7O84_RS01610]	6666666.269962.peg.2661	492	452	333	292	79	125	163
locus_tag=F7O84_RS01605]	6666666.269962.peg.2662	849	377	273	260	102	129	157
locus_tag=F7O84_RS01600]	6666666.269962.peg.2663	759	877	952	715	233	175	406
locus_tag=F7O84_RS01595]	6666666.269962.peg.2664	753	16897	15083	10673	3513	4964	6500
locus_tag=F7O84_RS01590]	6666666.269962.peg.2665	873	1039	840	911	275	428	380
locus_tag=F7O84_RS01580]	6666666.269962.peg.2666	771	374	397	385	51	35	84
locus_tag=F7O84_RS01575]	6666666.269962.peg.2667	678	996	943	1062	717	640	848
locus_tag=F7O84_RS01570]	6666666.269962.peg.2668	744	756	698	628	269	306	424
locus_tag=F7O84_RS01565]	6666666.269962.peg.2669	1377	2567	2228	2084	784	1094	1251
locus_tag=F7O84_RS11550]	6666666.269962.peg.267	1365	952	904	728	157	294	314
locus_tag=F7O84_RS01560]	6666666.269962.peg.2670	1647	5471	4907	4022	1171	1739	2040
locus_tag=F7O84_RS01555]	6666666.269962.peg.2671	759	267	313	249	118	115	134
locus_tag=F7O84_RS01550]	6666666.269962.peg.2672	1035	126	144	113	88	51	104
locus_tag=F7O84_RS03025]	6666666.269962.peg.2673	135	25	48	23	16	25	25
locus_tag=F7O84_RS01545]	6666666.269962.peg.2674	1239	4903	4469	3686	1162	1887	2148
locus_tag=F7O84_RS01540]	6666666.269962.peg.2675	1203	168	147	147	55	52	98
locus_tag=F7O84_RS01535]	6666666.269962.peg.2676	879	51	57	65	36	14	40
locus_tag=F7O84_RS01530]	6666666.269962.peg.2677	1416	313	258	220	89	133	152
locus_tag=F7O84_RS01525]	6666666.269962.peg.2678	1875	133	92	77	50	64	95
locus_tag=F7O84_RS02120]	6666666.269962.peg.2679	216	4	9	14	1	3	0
locus_tag=F7O84_RS11555]	6666666.269962.peg.268	1599	395	291	255	89	138	122
locus_tag=F7O84_RS02115]	6666666.269962.peg.2680	366	9	13	16	0	4	6
locus_tag=F7O84_RS00110]	6666666.269962.peg.2681	804	172	161	162	62	64	85
locus_tag=F7O84_RS00105]	6666666.269962.peg.2682	1020	498	419	369	218	297	319
locus_tag=F7O84_RS00100]	6666666.269962.peg.2683	591	376	418	388	205	194	254
locus_tag=F7O84_RS00095]	6666666.269962.peg.2684	918	322	254	188	174	232	251
locus_tag=F7O84_RS00090]	6666666.269962.peg.2685	249	39	45	43	11	15	30
locus_tag=F7O84_RS05480]	6666666.269962.peg.2686	138	27	40	15	5	13	9
locus_tag=F7O84_RS00085]	6666666.269962.peg.2687	453	501	403	268	104	138	151
locus_tag=F7O84_RS00080]	6666666.269962.peg.2688	702	1146	1095	876	125	209	248
locus_tag=F7O84_RS00075]	6666666.269962.peg.2689	441	603	532	350	88	136	154
locus_tag=F7O84_RS11560]	6666666.269962.peg.269	384	73	57	46	9	13	13
locus_tag=F7O84_RS00070]	6666666.269962.peg.2690	501	119	140	106	26	12	33
locus_tag=F7O84_RS00065]	6666666.269962.peg.2691	1230	2843	2420	1870	1102	1458	1875
locus_tag=F7O84_RS00060]	6666666.269962.peg.2692	1611	2433	2078	1674	789	927	1177
locus_tag=F7O84_RS00055]	6666666.269962.peg.2693	702	446	427	362	148	151	185
locus_tag=F7O84_RS00050]	6666666.269962.peg.2694	621	1177	1214	1083	667	470	1043
locus_tag=F7O84_RS00045]	6666666.269962.peg.2695	1146	5399	5772	5159	1325	1939	2382
locus_tag=F7O84_RS00040]	6666666.269962.peg.2696	1755	12161	11207	9108	3073	4615	5156
locus_tag=F7O84_RS00035]	6666666.269962.peg.2697	882	1846	2141	1902	640	498	790
locus_tag=F7O84_RS00030]	6666666.269962.peg.2698	972	1406	1664	1294	350	234	491
locus_tag=F7O84_RS00025]	6666666.269962.peg.2699	2244	17810	18616	14140	7298	6005	11846
locus_tag=F7O84_RS14680]	6666666.269962.peg.27	1455	28	26	13	23	24	25
locus_tag=F7O84_RS11565]	6666666.269962.peg.270	330	42	17	15	11	20	23
locus_tag=F7O84_RS00020]	6666666.269962.peg.2700	1677	1530	1478	1083	426	559	710
locus_tag=F7O84_RS00015]	6666666.269962.peg.2701	717	443	402	409	134	169	191
locus_tag=F7O84_RS00010]	6666666.269962.peg.2702	711	592	606	509	233	184	305
locus_tag=F7O84_RS00010]	6666666.269962.peg.2703	117	7	8	11	2	0	1
locus_tag=F7O84_RS13865]	6666666.269962.peg.2704	738	304	340	288	37	73	98
locus_tag=F7O84_RS13870]	6666666.269962.peg.2705	750	23	24	13	0	2	5
locus_tag=F7O84_RS13875]	6666666.269962.peg.2706	912	36	34	14	3	8	8
locus_tag=F7O84_RS13880]	6666666.269962.peg.2707	732	230	241	170	37	43	65
locus_tag=F7O84_RS13885]	6666666.269962.peg.2708	1377	876	804	560	218	281	408
locus_tag=F7O84_RS13890]	6666666.269962.peg.2709	1788	599	585	491	96	143	202
locus_tag=F7O84_RS11570]	6666666.269962.peg.271	822	85	35	53	25	32	36
locus_tag=F7O84_RS13895]	6666666.269962.peg.2710	1794	143	172	140	36	41	57
locus_tag=F7O84_RS13900]	6666666.269962.peg.2711	783	266	270	197	63	67	110
locus_tag=F7O84_RS13905]	6666666.269962.peg.2712	117	2	3	6	0	1	0
locus_tag=F7O84_RS13910]	6666666.269962.peg.2713	1779	983	1031	833	163	232	303
locus_tag=F7O84_RS13915]	6666666.269962.peg.2714	1350	5755	4490	3106	1022	1433	1918
locus_tag=F7O84_RS13920]	6666666.269962.peg.2715	777	101	99	78	36	35	42
locus_tag=F7O84_RS13925]	6666666.269962.peg.2716	657	874	746	551	195	293	376
locus_tag=F7O84_RS13930]	6666666.269962.peg.2717	240	1016	1234	946	168	284	307
locus_tag=F7O84_RS13935]	6666666.269962.peg.2718	1062	2433	2373	1908	581	727	1034
locus_tag=F7O84_RS13940]	6666666.269962.peg.2719	411	1229	1192	863	392	439	651
locus_tag=F7O84_RS11575]	6666666.269962.peg.272	1077	12	10	8	4	2	3
locus_tag=F7O84_RS13945]	6666666.269962.peg.2720	741	2576	2384	1654	428	553	760
locus_tag=F7O84_RS13950]	6666666.269962.peg.2721	990	1379	1235	888	440	384	582
locus_tag=F7O84_RS13955]	6666666.269962.peg.2722	636	855	1041	1056	267	74	197
locus_tag=F7O84_RS13960]	6666666.269962.peg.2723	1323	9	15	10	6	1	3
locus_tag=F7O84_RS13965]	6666666.269962.peg.2724	441	1	0	0	0	0	0
locus_tag=F7O84_RS13970]	6666666.269962.peg.2725	426	0	1	2	2	1	2
locus_tag=F7O84_RS13975]	6666666.269962.peg.2726	915	4	4	3	1	0	2
locus_tag=F7O84_RS13980]	6666666.269962.peg.2727	1548	6	15	8	2	3	3
locus_tag=F7O84_RS13985]	6666666.269962.peg.2728	174	10	11	8	2	1	4
locus_tag=F7O84_RS13990]	6666666.269962.peg.2729	1479	6	10	7	1	0	1
locus_tag=F7O84_RS11580]	6666666.269962.peg.273	672	15	7	9	5	3	6
locus_tag=F7O84_RS13995]	6666666.269962.peg.2730	741	1	0	0	1	0	3
locus_tag=F7O84_RS14000]	6666666.269962.peg.2731	1227	8	3	0	4	1	1
locus_tag=F7O84_RS14005]	6666666.269962.peg.2732	1023	2	1	1	0	5	0
locus_tag=F7O84_RS14010]	6666666.269962.peg.2733	330	1	5	3	1	0	0
locus_tag=F7O84_RS14015]	6666666.269962.peg.2734	273	1	1	0	0	0	0
locus_tag=F7O84_RS14020]	6666666.269962.peg.2735	273	1	5	1	1	0	1
locus_tag=F7O84_RS14025]	6666666.269962.peg.2736	477	438	375	263	133	168	257
locus_tag=F7O84_RS14030]	6666666.269962.peg.2737	1524	2463	2009	1406	509	849	971
locus_tag=F7O84_RS14035]	6666666.269962.peg.2738	3147	1740	1504	1075	416	591	754
locus_tag=F7O84_RS14040]	6666666.269962.peg.2739	1680	455	501	395	106	106	155
locus_tag=F7O84_RS11585]	6666666.269962.peg.274	834	24	18	26	7	10	9
locus_tag=F7O84_RS14045]	6666666.269962.peg.2740	840	231	254	148	47	81	102
locus_tag=F7O84_RS14050]	6666666.269962.peg.2741	498	170	149	86	17	30	45
locus_tag=F7O84_RS14055]	6666666.269962.peg.2742	837	308	304	288	111	95	165
locus_tag=F7O84_RS14060]	6666666.269962.peg.2743	729	302	326	257	187	160	316
locus_tag=F7O84_RS14065]	6666666.269962.peg.2744	939	104	142	125	58	20	56
locus_tag=F7O84_RS14070]	6666666.269962.peg.2745	1251	105	140	124	20	9	21
locus_tag=F7O84_RS14075]	6666666.269962.peg.2746	474	51	63	54	29	13	17
locus_tag=F7O84_RS14080]	6666666.269962.peg.2747	480	14	10	10	9	7	8
locus_tag=F7O84_RS14085]	6666666.269962.peg.2748	1089	89	103	85	50	23	54
locus_tag=F7O84_RS14090]	6666666.269962.peg.2749	1230	71	65	40	36	28	56
locus_tag=F7O84_RS14805]	6666666.269962.peg.275	708	143	186	147	18	7	18
locus_tag=F7O84_RS14095]	6666666.269962.peg.2750	2325	516	523	394	205	152	255
locus_tag=F7O84_RS14100]	6666666.269962.peg.2751	1221	316	296	265	76	106	139
locus_tag=F7O84_RS14105]	6666666.269962.peg.2752	1491	990	801	630	240	356	432
locus_tag=F7O84_RS14110]	6666666.269962.peg.2753	1008	307	269	214	111	166	198
locus_tag=F7O84_RS14115]	6666666.269962.peg.2754	945	143	208	164	106	57	150
locus_tag=F7O84_RS14120]	6666666.269962.peg.2755	1920	1399	1113	903	428	638	677
locus_tag=F7O84_RS14125]	6666666.269962.peg.2756	1155	700	603	575	526	783	1043
locus_tag=F7O84_RS14130]	6666666.269962.peg.2757	1539	446	383	339	393	544	597
locus_tag=F7O84_RS14135]	6666666.269962.peg.2758	1158	2635	2428	2255	2836	4796	5144
locus_tag=F7O84_RS14140]	6666666.269962.peg.2759	1032	71	79	81	87	124	134
locus_tag=F7O84_RS14810]	6666666.269962.peg.276	537	430	373	333	57	83	91
locus_tag=F7O84_RS14145]	6666666.269962.peg.2760	1605	56	31	26	38	46	71
locus_tag=F7O84_RS14150]	6666666.269962.peg.2761	1524	23	32	18	23	14	30
locus_tag=F7O84_RS14155]	6666666.269962.peg.2762	1041	33	21	14	24	27	41
locus_tag=F7O84_RS14160]	6666666.269962.peg.2763	2523	3599	3151	2283	1192	1474	1978
locus_tag=F7O84_RS14165]	6666666.269962.peg.2764	2289	11582	11112	9437	1285	2110	2429
locus_tag=F7O84_RS14170]	6666666.269962.peg.2765	1392	368	379	330	74	33	81
locus_tag=F7O84_RS14175]	6666666.269962.peg.2766	258	32	46	24	9	11	23
locus_tag=F7O84_RS14180]	6666666.269962.peg.2767	213	5	4	9	1	0	1
locus_tag=F7O84_RS14185]	6666666.269962.peg.2768	402	65	63	66	18	20	21
locus_tag=F7O84_RS14190]	6666666.269962.peg.2769	810	82	51	55	43	53	73
locus_tag=F7O84_RS14815]	6666666.269962.peg.277	846	699	877	717	130	180	259
locus_tag=F7O84_RS14195]	6666666.269962.peg.2770	795	6	4	3	1	1	5
locus_tag=F7O84_RS14200]	6666666.269962.peg.2771	639	5	8	3	2	5	2
locus_tag=F7O84_RS14205]	6666666.269962.peg.2772	1209	12	26	29	5	4	4
locus_tag=F7O84_RS14210]	6666666.269962.peg.2773	804	46	26	34	5	6	14
locus_tag=F7O84_RS14215]	6666666.269962.peg.2774	1347	334	317	265	62	117	127
locus_tag=F7O84_RS14220]	6666666.269962.peg.2775	1404	89	69	64	20	23	37
locus_tag=F7O84_RS14225]	6666666.269962.peg.2776	234	6	2	2	0	0	0
locus_tag=F7O84_RS14230]	6666666.269962.peg.2777	1215	122	118	103	37	34	66
locus_tag=F7O84_RS14235]	6666666.269962.peg.2778	2214	100	75	66	20	41	45
locus_tag=F7O84_RS14240]	6666666.269962.peg.2779	1470	24	15	25	3	4	11
locus_tag=F7O84_RS14820]	6666666.269962.peg.278	1590	136	224	204	2	6	7
locus_tag=F7O84_RS14245]	6666666.269962.peg.2780	2229	51	47	39	12	10	13
locus_tag=F7O84_RS14250]	6666666.269962.peg.2781	1800	107	97	99	37	46	54
locus_tag=F7O84_RS14255]	6666666.269962.peg.2782	1008	36	39	28	5	6	14
locus_tag=F7O84_RS14260]	6666666.269962.peg.2783	570	9	36	14	9	5	25
locus_tag=F7O84_RS16350]	6666666.269962.peg.2784	129	4	1	0	7	1	3
locus_tag=F7O84_RS14265]	6666666.269962.peg.2785	612	300	277	194	132	126	191
locus_tag=F7O84_RS14270]	6666666.269962.peg.2786	474	988	967	797	348	387	558
locus_tag=F7O84_RS14275]	6666666.269962.peg.2787	327	71	61	58	15	9	18
locus_tag=F7O84_RS14280]	6666666.269962.peg.2788	273	20	28	32	5	3	8
locus_tag=F7O84_RS14285]	6666666.269962.peg.2789	309	17	27	13	7	3	4
locus_tag=F7O84_RS14825]	6666666.269962.peg.279	2499	8997	8349	6493	1476	1970	2740
locus_tag=F7O84_RS14290]	6666666.269962.peg.2790	255	2	2	1	0	0	0
locus_tag=F7O84_RS14295]	6666666.269962.peg.2791	165	1	2	0	0	0	0
locus_tag=F7O84_RS14300]	6666666.269962.peg.2792	201	0	0	0	1	0	1
locus_tag=F7O84_RS10910]	6666666.269962.peg.2793	123	0	0	0	0	0	0
locus_tag=F7O84_RS11805]	6666666.269962.peg.2794	171	1	0	0	2	0	2
locus_tag=F7O84_RS14305]	6666666.269962.peg.2795	642	1	4	1	1	0	1
locus_tag=F7O84_RS07580]	6666666.269962.peg.2796	249	51	81	86	1	2	5
locus_tag=F7O84_RS14310]	6666666.269962.peg.2797	867	649	573	513	342	277	485
[truncated: 1,770 more rows]

## Sheet: RAST_NCBI_locusTag
RAST	NCBI
6666666.269962.peg.1	locus_tag=F7O84_RS12565]
6666666.269962.peg.10	locus_tag=F7O84_RS12615]
6666666.269962.peg.100	locus_tag=F7O84_RS07955]
6666666.269962.peg.1000	locus_tag=F7O84_RS16570]
6666666.269962.peg.1001	locus_tag=F7O84_RS16565]
6666666.269962.peg.1002	locus_tag=F7O84_RS16560]
6666666.269962.peg.1003	locus_tag=F7O84_RS16555]
6666666.269962.peg.1004	locus_tag=F7O84_RS16550]
6666666.269962.peg.1005	locus_tag=F7O84_RS16545]
6666666.269962.peg.1006	locus_tag=F7O84_RS16540]
6666666.269962.peg.1007	locus_tag=F7O84_RS16535]
6666666.269962.peg.1008	locus_tag=F7O84_RS16530]
6666666.269962.peg.1009	locus_tag=F7O84_RS16525]
6666666.269962.peg.101	locus_tag=F7O84_RS07950]
6666666.269962.peg.1010	locus_tag=F7O84_RS16520]
6666666.269962.peg.1011	locus_tag=F7O84_RS16515]
6666666.269962.peg.1012	locus_tag=F7O84_RS16510]
6666666.269962.peg.1013	locus_tag=F7O84_RS16505]
6666666.269962.peg.1014	locus_tag=F7O84_RS16500]
6666666.269962.peg.1015	locus_tag=F7O84_RS16495]
6666666.269962.peg.1016	locus_tag=F7O84_RS16490]
6666666.269962.peg.1017	locus_tag=F7O84_RS16485]
6666666.269962.peg.1018	locus_tag=F7O84_RS16480]
6666666.269962.peg.1019	locus_tag=F7O84_RS16475]
6666666.269962.peg.102	locus_tag=F7O84_RS07945]
6666666.269962.peg.1020	locus_tag=F7O84_RS16470]
6666666.269962.peg.1021	locus_tag=F7O84_RS11400]
6666666.269962.peg.1022	locus_tag=F7O84_RS16465]
6666666.269962.peg.1023	locus_tag=F7O84_RS16455]
6666666.269962.peg.1024	locus_tag=F7O84_RS16490]
6666666.269962.peg.1025	locus_tag=F7O84_RS16450]
6666666.269962.peg.1026	locus_tag=F7O84_RS16445]
6666666.269962.peg.1027	locus_tag=F7O84_RS16440]
6666666.269962.peg.1028	locus_tag=F7O84_RS16435]
6666666.269962.peg.1029	locus_tag=F7O84_RS16430]
6666666.269962.peg.103	locus_tag=F7O84_RS07940]
6666666.269962.peg.1030	locus_tag=F7O84_RS17130]
6666666.269962.peg.1031	locus_tag=F7O84_RS10620]
6666666.269962.peg.1032	locus_tag=F7O84_RS16420]
6666666.269962.peg.1033	locus_tag=F7O84_RS16415]
6666666.269962.peg.1034	locus_tag=F7O84_RS16410]
6666666.269962.peg.1035	locus_tag=F7O84_RS16405]
6666666.269962.peg.1036	locus_tag=F7O84_RS02590]
6666666.269962.peg.1037	locus_tag=F7O84_RS16400]
6666666.269962.peg.1038	locus_tag=F7O84_RS16395]
6666666.269962.peg.1039	locus_tag=F7O84_RS16390]
6666666.269962.peg.104	locus_tag=F7O84_RS07935]
6666666.269962.peg.1040	locus_tag=F7O84_RS16385]
6666666.269962.peg.1041	locus_tag=F7O84_RS16380]
6666666.269962.peg.1042	locus_tag=F7O84_RS16375]
6666666.269962.peg.1043	locus_tag=F7O84_RS16365]
6666666.269962.peg.1044	locus_tag=F7O84_RS16360]
6666666.269962.peg.1045	locus_tag=F7O84_RS16355]
6666666.269962.peg.1046	locus_tag=F7O84_RS16350]
6666666.269962.peg.1047	locus_tag=F7O84_RS16345]
6666666.269962.peg.1048	locus_tag=F7O84_RS16340]
6666666.269962.peg.1049	locus_tag=F7O84_RS16335]
6666666.269962.peg.105	locus_tag=F7O84_RS07930]
6666666.269962.peg.1050	locus_tag=F7O84_RS16330]
6666666.269962.peg.1051	locus_tag=F7O84_RS16675]
6666666.269962.peg.1052	locus_tag=F7O84_RS16325]
6666666.269962.peg.1053	locus_tag=F7O84_RS16320]
6666666.269962.peg.1054	locus_tag=F7O84_RS16310]
6666666.269962.peg.1055	locus_tag=F7O84_RS16305]
6666666.269962.peg.1056	locus_tag=F7O84_RS16300]
6666666.269962.peg.1057	locus_tag=F7O84_RS16295]
6666666.269962.peg.1058	locus_tag=F7O84_RS16290]
6666666.269962.peg.1059	locus_tag=F7O84_RS16285]
6666666.269962.peg.106	locus_tag=F7O84_RS07925]
6666666.269962.peg.1060	locus_tag=F7O84_RS16280]
6666666.269962.peg.1061	locus_tag=F7O84_RS16275]
6666666.269962.peg.1062	locus_tag=F7O84_RS16270]
6666666.269962.peg.1063	locus_tag=F7O84_RS16265]
6666666.269962.peg.1064	locus_tag=F7O84_RS03670]
6666666.269962.peg.1065	locus_tag=F7O84_RS16260]
6666666.269962.peg.1066	locus_tag=F7O84_RS16255]
6666666.269962.peg.1067	locus_tag=F7O84_RS02185]
6666666.269962.peg.1068	locus_tag=F7O84_RS16250]
6666666.269962.peg.1069	locus_tag=F7O84_RS16245]
6666666.269962.peg.107	locus_tag=F7O84_RS07920]
6666666.269962.peg.1070	locus_tag=F7O84_RS16240]
6666666.269962.peg.1071	locus_tag=F7O84_RS16235]
6666666.269962.peg.1072	locus_tag=F7O84_RS16230]
6666666.269962.peg.1073	locus_tag=F7O84_RS16225]
6666666.269962.peg.1074	locus_tag=F7O84_RS16220]
6666666.269962.peg.1075	locus_tag=F7O84_RS16215]
6666666.269962.peg.1076	locus_tag=F7O84_RS16210]
6666666.269962.peg.1077	locus_tag=F7O84_RS16205]
6666666.269962.peg.1078	locus_tag=F7O84_RS16200]
6666666.269962.peg.1079	locus_tag=F7O84_RS16195]
6666666.269962.peg.108	locus_tag=F7O84_RS07915]
6666666.269962.peg.1080	locus_tag=F7O84_RS16190]
6666666.269962.peg.1081	locus_tag=F7O84_RS16185]
6666666.269962.peg.1082	locus_tag=F7O84_RS10595]
6666666.269962.peg.1083	locus_tag=F7O84_RS10590]
6666666.269962.peg.1084	locus_tag=F7O84_RS10585]
6666666.269962.peg.1085	locus_tag=F7O84_RS10580]
6666666.269962.peg.1086	locus_tag=F7O84_RS10575]
6666666.269962.peg.1087	locus_tag=F7O84_RS13855]
6666666.269962.peg.1088	locus_tag=F7O84_RS13850]
6666666.269962.peg.1089	locus_tag=F7O84_RS13845]
6666666.269962.peg.109	locus_tag=F7O84_RS07910]
6666666.269962.peg.1090	locus_tag=F7O84_RS13840]
6666666.269962.peg.1091	locus_tag=F7O84_RS13835]
6666666.269962.peg.1092	locus_tag=F7O84_RS13830]
6666666.269962.peg.1093	locus_tag=F7O84_RS17150]
6666666.269962.peg.1094	locus_tag=F7O84_RS17155]
6666666.269962.peg.1095	locus_tag=F7O84_RS17160]
6666666.269962.peg.1096	locus_tag=F7O84_RS17165]
6666666.269962.peg.1097	locus_tag=F7O84_RS17170]
6666666.269962.peg.1098	locus_tag=F7O84_RS17175]
6666666.269962.peg.1099	locus_tag=F7O84_RS17180]
6666666.269962.peg.11	locus_tag=F7O84_RS12620]
6666666.269962.peg.110	locus_tag=F7O84_RS07905]
6666666.269962.peg.1100	locus_tag=F7O84_RS17185]
6666666.269962.peg.1101	locus_tag=F7O84_RS17195]
6666666.269962.peg.1102	locus_tag=F7O84_RS17200]
6666666.269962.peg.1103	locus_tag=F7O84_RS17205]
6666666.269962.peg.1104	locus_tag=F7O84_RS17210]
6666666.269962.peg.1105	locus_tag=F7O84_RS17215]
6666666.269962.peg.1106	locus_tag=F7O84_RS17225]
6666666.269962.peg.1107	locus_tag=F7O84_RS17230]
6666666.269962.peg.1108	locus_tag=F7O84_RS17235]
6666666.269962.peg.1109	locus_tag=F7O84_RS17240]
6666666.269962.peg.111	locus_tag=F7O84_RS07900]
6666666.269962.peg.1110	locus_tag=F7O84_RS17245]
6666666.269962.peg.1111	locus_tag=F7O84_RS17250]
6666666.269962.peg.1112	locus_tag=F7O84_RS17255]
6666666.269962.peg.1113	locus_tag=F7O84_RS17260]
6666666.269962.peg.1114	locus_tag=F7O84_RS17265]
6666666.269962.peg.1115	locus_tag=F7O84_RS17270]
6666666.269962.peg.1116	locus_tag=F7O84_RS17275]
6666666.269962.peg.1117	locus_tag=F7O84_RS17280]
6666666.269962.peg.1118	locus_tag=F7O84_RS17285]
6666666.269962.peg.1119	locus_tag=F7O84_RS17290]
6666666.269962.peg.112	locus_tag=F7O84_RS07895]
6666666.269962.peg.1120	locus_tag=F7O84_RS17295]
6666666.269962.peg.1121	locus_tag=F7O84_RS17300]
6666666.269962.peg.1122	locus_tag=F7O84_RS17305]
6666666.269962.peg.1123	locus_tag=F7O84_RS17310]
6666666.269962.peg.1124	locus_tag=F7O84_RS17315]
6666666.269962.peg.1125	locus_tag=F7O84_RS17320]
6666666.269962.peg.1126	locus_tag=F7O84_RS17325]
6666666.269962.peg.1127	locus_tag=F7O84_RS17330]
6666666.269962.peg.1128	locus_tag=F7O84_RS17335]
6666666.269962.peg.1129	locus_tag=F7O84_RS17340]
6666666.269962.peg.113	locus_tag=F7O84_RS07890]
6666666.269962.peg.1130	locus_tag=F7O84_RS17345]
6666666.269962.peg.1131	locus_tag=F7O84_RS17350]
6666666.269962.peg.1132	locus_tag=F7O84_RS17355]
6666666.269962.peg.1133	locus_tag=F7O84_RS17360]
6666666.269962.peg.1134	locus_tag=F7O84_RS17365]
6666666.269962.peg.1135	locus_tag=F7O84_RS17370]
6666666.269962.peg.1136	locus_tag=F7O84_RS17375]
6666666.269962.peg.1137	locus_tag=F7O84_RS17380]
6666666.269962.peg.1138	locus_tag=F7O84_RS17385]
6666666.269962.peg.1139	locus_tag=F7O84_RS17390]
6666666.269962.peg.114	locus_tag=F7O84_RS07885]
6666666.269962.peg.1140	locus_tag=F7O84_RS17395]
6666666.269962.peg.1141	locus_tag=F7O84_RS17400]
6666666.269962.peg.1142	locus_tag=F7O84_RS17405]
6666666.269962.peg.1143	locus_tag=F7O84_RS17410]
6666666.269962.peg.1144	locus_tag=F7O84_RS17415]
6666666.269962.peg.1145	locus_tag=F7O84_RS17420]
6666666.269962.peg.1146	locus_tag=F7O84_RS17425]
6666666.269962.peg.1147	locus_tag=F7O84_RS17430]
6666666.269962.peg.1148	locus_tag=F7O84_RS17435]
6666666.269962.peg.1149	locus_tag=F7O84_RS17440]
6666666.269962.peg.115	locus_tag=F7O84_RS07880]
6666666.269962.peg.1150	locus_tag=F7O84_RS17445]
6666666.269962.peg.1151	locus_tag=F7O84_RS17450]
6666666.269962.peg.1152	locus_tag=F7O84_RS17455]
6666666.269962.peg.1153	locus_tag=F7O84_RS17460]
6666666.269962.peg.1154	locus_tag=F7O84_RS17465]
6666666.269962.peg.1155	locus_tag=F7O84_RS17470]
6666666.269962.peg.1156	locus_tag=F7O84_RS17475]
6666666.269962.peg.1157	locus_tag=F7O84_RS17480]
6666666.269962.peg.1158	locus_tag=F7O84_RS17485]
6666666.269962.peg.1159	locus_tag=F7O84_RS17490]
6666666.269962.peg.116	locus_tag=F7O84_RS07875]
6666666.269962.peg.1160	locus_tag=F7O84_RS17495]
6666666.269962.peg.1161	locus_tag=F7O84_RS17500]
6666666.269962.peg.1162	locus_tag=F7O84_RS17505]
6666666.269962.peg.1163	locus_tag=F7O84_RS17510]
6666666.269962.peg.1164	locus_tag=F7O84_RS17515]
6666666.269962.peg.1165	locus_tag=F7O84_RS17520]
6666666.269962.peg.1166	locus_tag=F7O84_RS17525]
6666666.269962.peg.1167	locus_tag=F7O84_RS13250]
6666666.269962.peg.1168	locus_tag=F7O84_RS17530]
6666666.269962.peg.1169	locus_tag=F7O84_RS10580]
6666666.269962.peg.117	locus_tag=F7O84_RS07870]
6666666.269962.peg.1170	locus_tag=F7O84_RS17535]
6666666.269962.peg.1171	locus_tag=F7O84_RS17540]
6666666.269962.peg.1172	locus_tag=F7O84_RS17545]
6666666.269962.peg.1173	locus_tag=F7O84_RS17550]
6666666.269962.peg.1174	locus_tag=F7O84_RS17555]
6666666.269962.peg.1175	locus_tag=F7O84_RS17560]
6666666.269962.peg.1176	locus_tag=F7O84_RS17565]
6666666.269962.peg.1177	locus_tag=F7O84_RS17570]
6666666.269962.peg.1178	locus_tag=F7O84_RS17575]
6666666.269962.peg.1179	locus_tag=F7O84_RS17580]
6666666.269962.peg.118	locus_tag=F7O84_RS07865]
6666666.269962.peg.1180	locus_tag=F7O84_RS17585]
6666666.269962.peg.1181	locus_tag=F7O84_RS17590]
6666666.269962.peg.1182	locus_tag=F7O84_RS17595]
6666666.269962.peg.1183	locus_tag=F7O84_RS17600]
6666666.269962.peg.1184	locus_tag=F7O84_RS17605]
6666666.269962.peg.1185	locus_tag=F7O84_RS08860]
6666666.269962.peg.1186	locus_tag=F7O84_RS17610]
6666666.269962.peg.1187	locus_tag=F7O84_RS17615]
6666666.269962.peg.1188	locus_tag=F7O84_RS17620]
6666666.269962.peg.1189	locus_tag=F7O84_RS17625]
6666666.269962.peg.119	locus_tag=F7O84_RS07860]
6666666.269962.peg.1190	locus_tag=F7O84_RS17630]
6666666.269962.peg.1191	locus_tag=F7O84_RS17635]
6666666.269962.peg.1192	locus_tag=F7O84_RS17640]
6666666.269962.peg.1193	locus_tag=F7O84_RS17645]
6666666.269962.peg.1194	locus_tag=F7O84_RS17650]
6666666.269962.peg.1195	locus_tag=F7O84_RS17655]
6666666.269962.peg.1196	locus_tag=F7O84_RS17660]
6666666.269962.peg.1197	locus_tag=F7O84_RS17665]
6666666.269962.peg.1198	locus_tag=F7O84_RS17670]
6666666.269962.peg.1199	locus_tag=F7O84_RS17675]
6666666.269962.peg.12	locus_tag=F7O84_RS12625]
6666666.269962.peg.120	locus_tag=F7O84_RS07855]
6666666.269962.peg.1200	locus_tag=F7O84_RS17680]
6666666.269962.peg.1201	locus_tag=F7O84_RS17685]
6666666.269962.peg.1202	locus_tag=F7O84_RS17690]
6666666.269962.peg.1203	locus_tag=F7O84_RS17695]
6666666.269962.peg.1204	locus_tag=F7O84_RS17700]
6666666.269962.peg.1205	locus_tag=F7O84_RS17705]
6666666.269962.peg.1206	locus_tag=F7O84_RS17710]
6666666.269962.peg.1207	locus_tag=F7O84_RS17715]
6666666.269962.peg.1208	locus_tag=F7O84_RS17720]
6666666.269962.peg.1209	locus_tag=F7O84_RS17725]
6666666.269962.peg.121	locus_tag=F7O84_RS07850]
6666666.269962.peg.1210	locus_tag=F7O84_RS17730]
6666666.269962.peg.1211	locus_tag=F7O84_RS17735]
6666666.269962.peg.1212	locus_tag=F7O84_RS17740]
6666666.269962.peg.1213	locus_tag=F7O84_RS17750]
6666666.269962.peg.1214	locus_tag=F7O84_RS17755]
6666666.269962.peg.1215	locus_tag=F7O84_RS17765]
6666666.269962.peg.1216	locus_tag=F7O84_RS17770]
6666666.269962.peg.1217	locus_tag=F7O84_RS17775]
6666666.269962.peg.1218	locus_tag=F7O84_RS17780]
6666666.269962.peg.1219	locus_tag=F7O84_RS17785]
6666666.269962.peg.122	locus_tag=F7O84_RS07845]
6666666.269962.peg.1220	locus_tag=F7O84_RS17790]
6666666.269962.peg.1221	locus_tag=F7O84_RS17795]
6666666.269962.peg.1222	locus_tag=F7O84_RS17800]
6666666.269962.peg.1223	locus_tag=F7O84_RS17805]
6666666.269962.peg.1224	locus_tag=F7O84_RS17810]
6666666.269962.peg.1225	locus_tag=F7O84_RS17815]
6666666.269962.peg.1226	locus_tag=F7O84_RS17820]
6666666.269962.peg.1227	locus_tag=F7O84_RS17825]
6666666.269962.peg.1228	locus_tag=F7O84_RS17830]
6666666.269962.peg.1229	locus_tag=F7O84_RS17835]
6666666.269962.peg.123	locus_tag=F7O84_RS07840]
6666666.269962.peg.1230	locus_tag=F7O84_RS17840]
6666666.269962.peg.1231	locus_tag=F7O84_RS17845]
6666666.269962.peg.1232	locus_tag=F7O84_RS17850]
6666666.269962.peg.1233	locus_tag=F7O84_RS17855]
6666666.269962.peg.1234	locus_tag=F7O84_RS17860]
6666666.269962.peg.1235	locus_tag=F7O84_RS17865]
6666666.269962.peg.1236	locus_tag=F7O84_RS17870]
6666666.269962.peg.1237	locus_tag=F7O84_RS17875]
6666666.269962.peg.1238	locus_tag=F7O84_RS17880]
6666666.269962.peg.1239	locus_tag=F7O84_RS17885]
6666666.269962.peg.124	locus_tag=F7O84_RS07835]
6666666.269962.peg.1240	locus_tag=F7O84_RS17890]
6666666.269962.peg.1241	locus_tag=F7O84_RS17895]
6666666.269962.peg.1242	locus_tag=F7O84_RS17900]
6666666.269962.peg.1243	locus_tag=F7O84_RS17905]
6666666.269962.peg.1244	locus_tag=F7O84_RS17910]
6666666.269962.peg.1245	locus_tag=F7O84_RS17915]
6666666.269962.peg.1246	locus_tag=F7O84_RS17920]
6666666.269962.peg.1247	locus_tag=F7O84_RS17925]
6666666.269962.peg.1248	locus_tag=F7O84_RS17930]
6666666.269962.peg.1249	locus_tag=F7O84_RS17935]
6666666.269962.peg.125	locus_tag=F7O84_RS07830]
6666666.269962.peg.1250	locus_tag=F7O84_RS17940]
6666666.269962.peg.1251	locus_tag=F7O84_RS17945]
6666666.269962.peg.1252	locus_tag=F7O84_RS17950]
6666666.269962.peg.1253	locus_tag=F7O84_RS17955]
[truncated: 3,484 more rows]
